# Supplementary material for: Highly accurate ab initio gene annotation with ANNEVO
Source: Research Square preprint supplement (doi:10.21203/rs.3.rs-6402260/v1), 2025-04-24

Additional Genes Near BUSCO genes Predicted by  
ANNEVO and Fully Supported by RNA-Seq

Missing BUSCO Gene in Ensembl

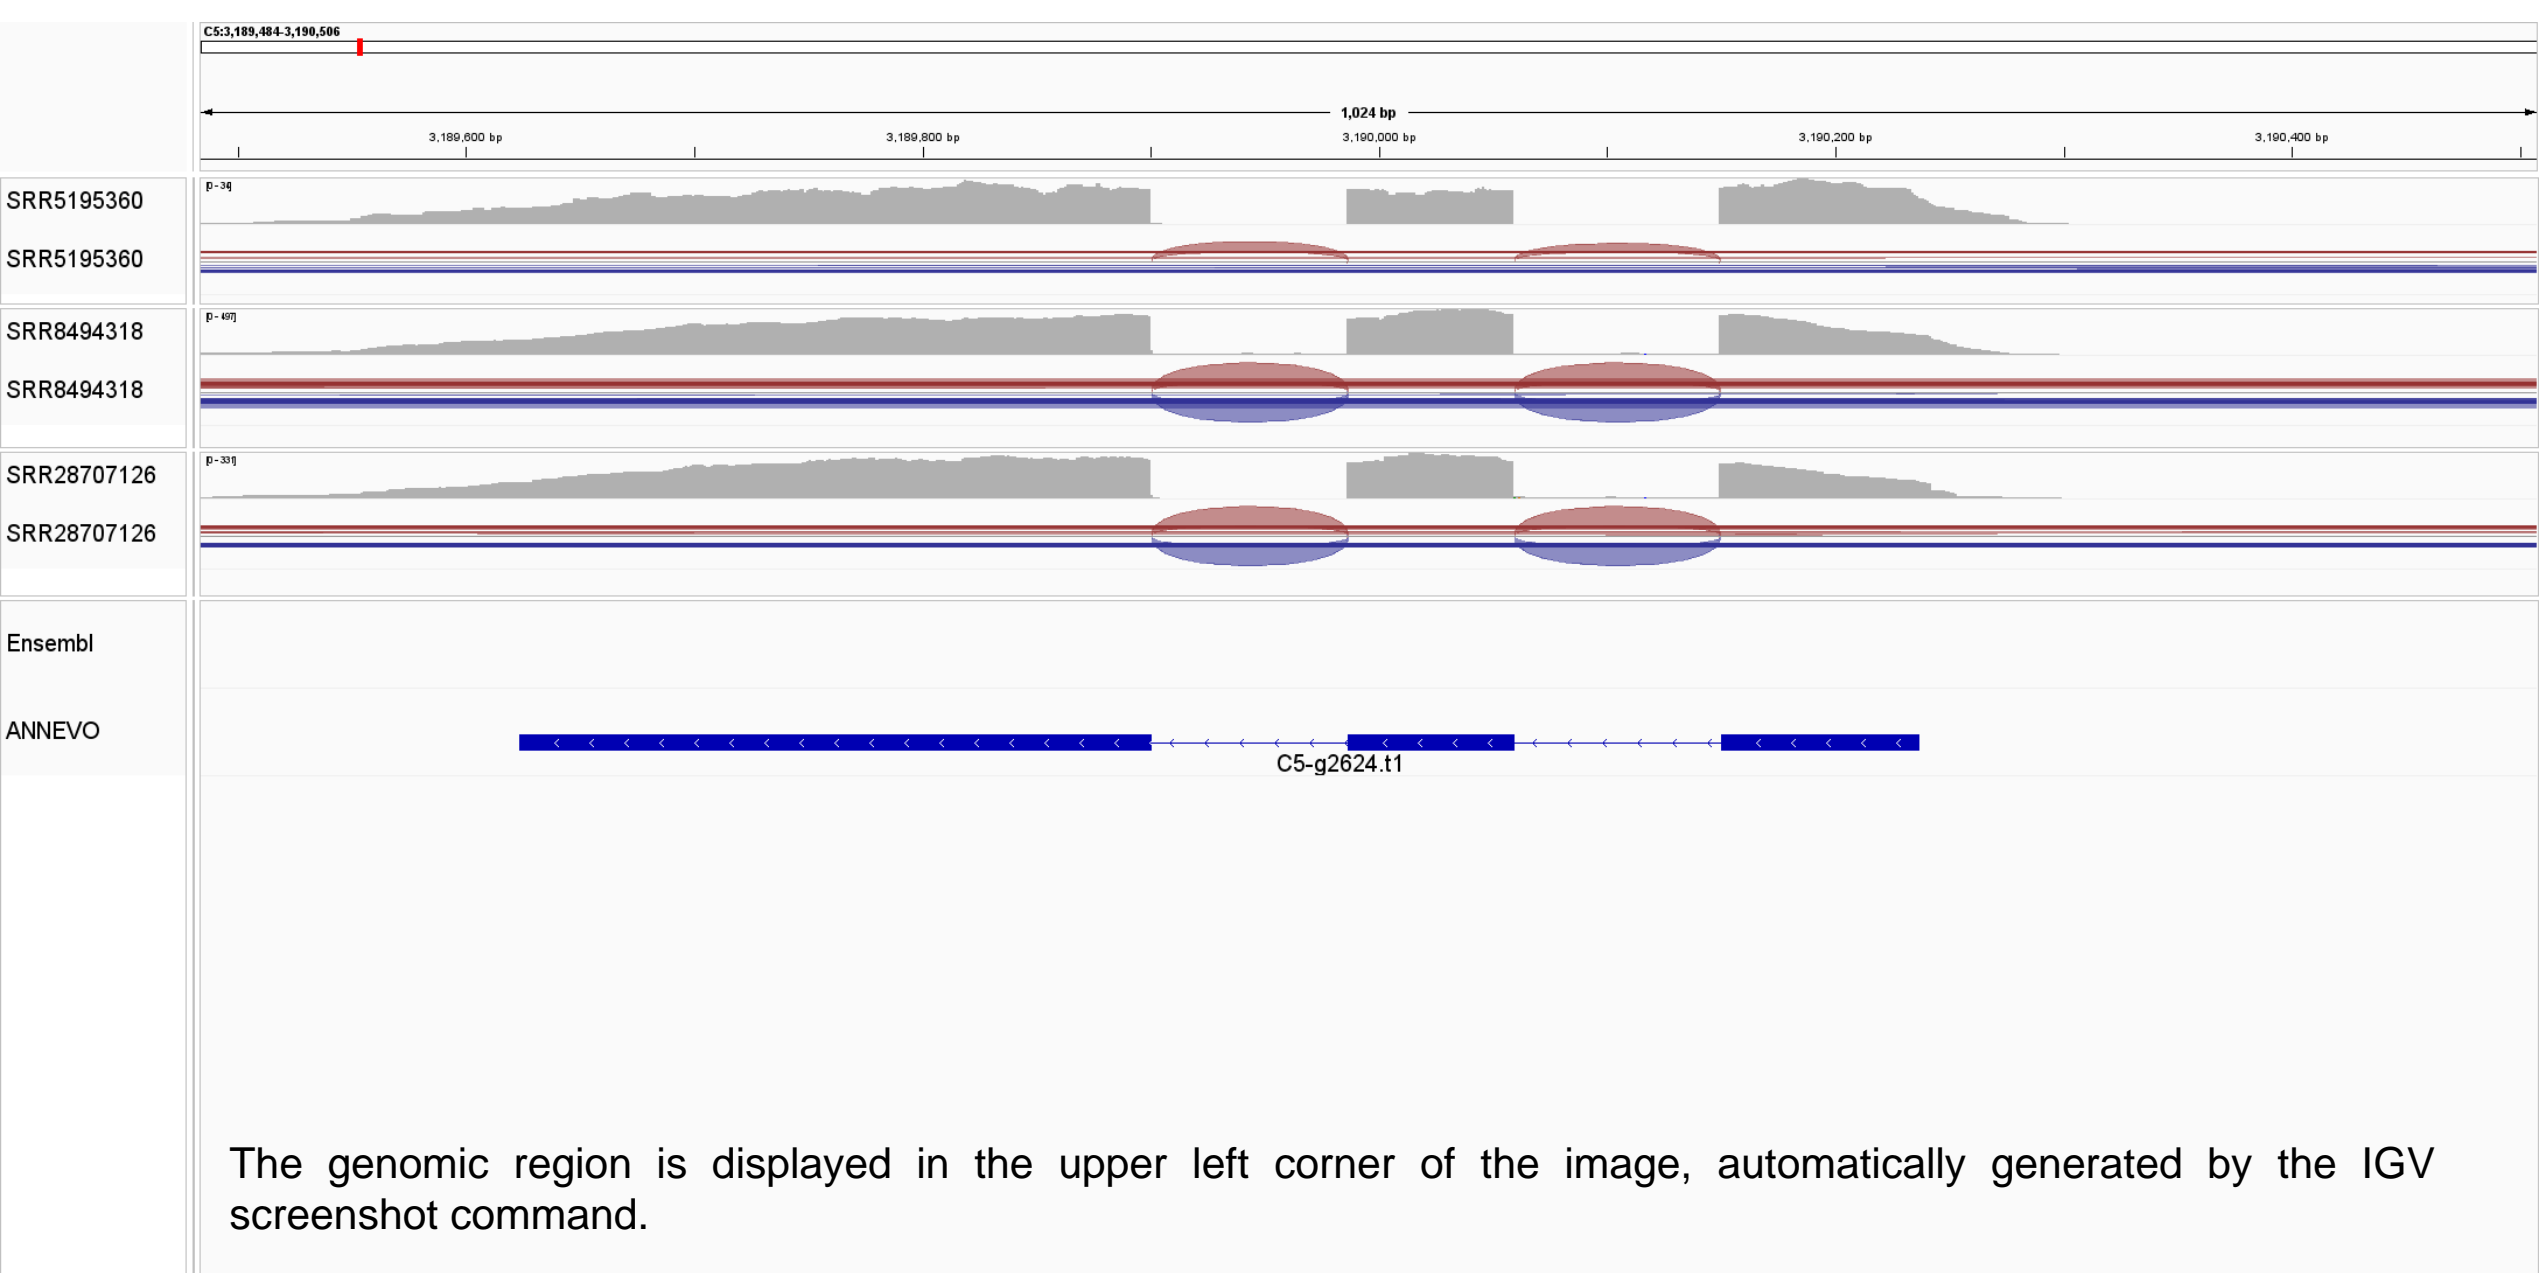

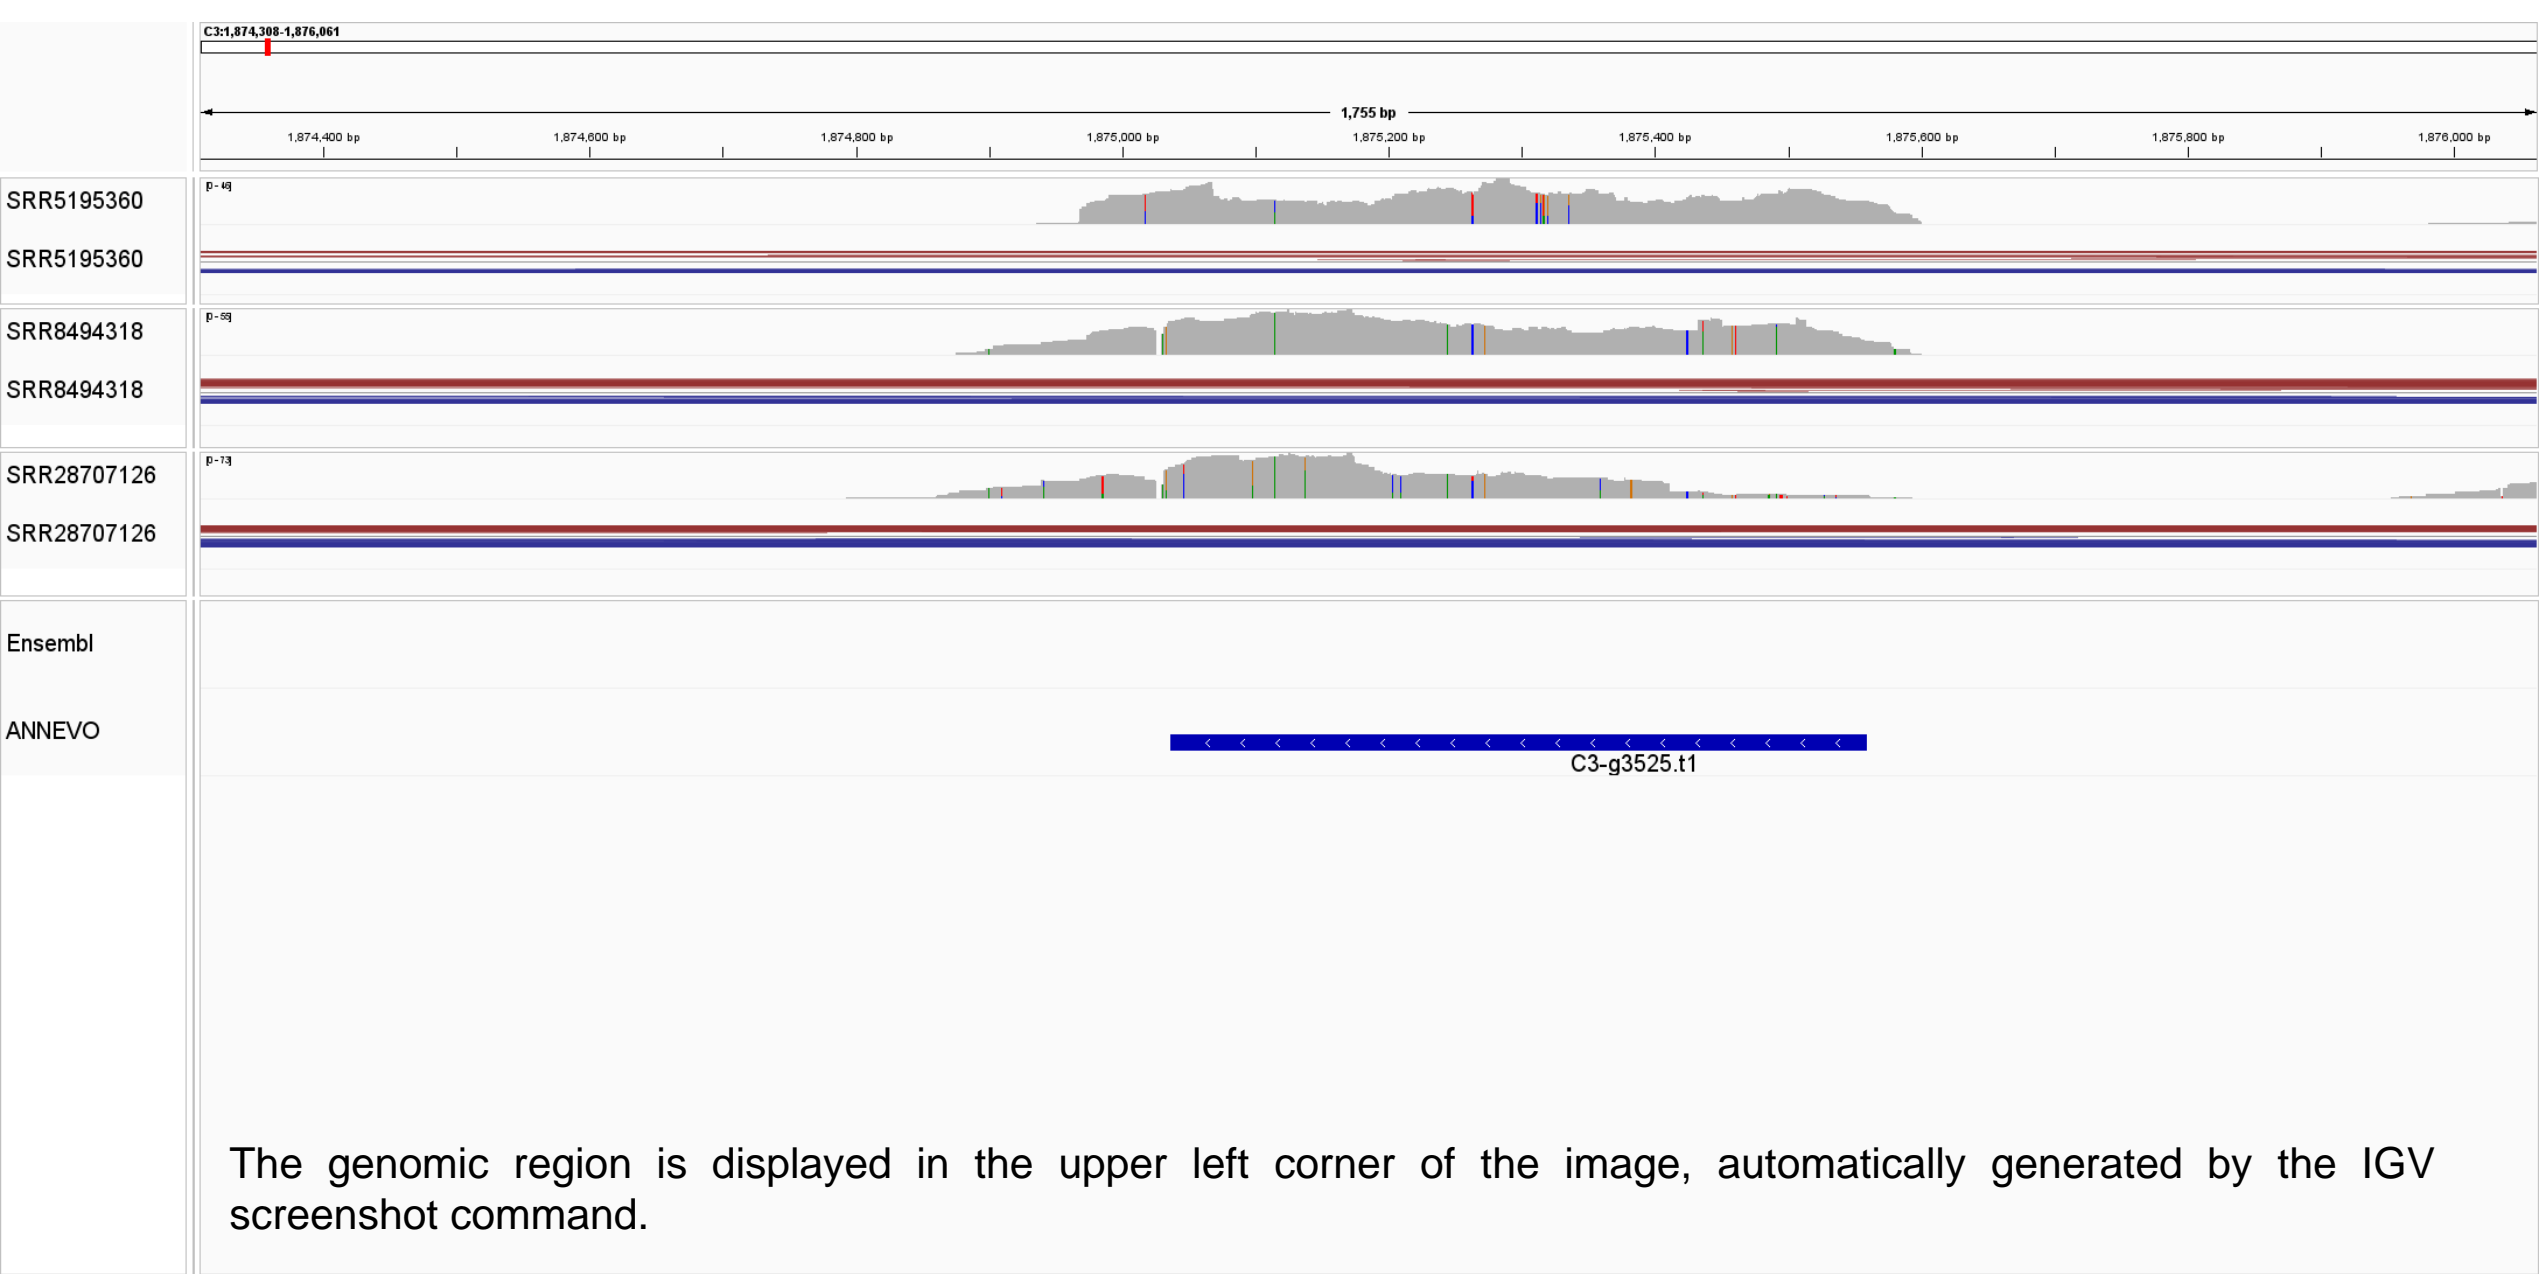

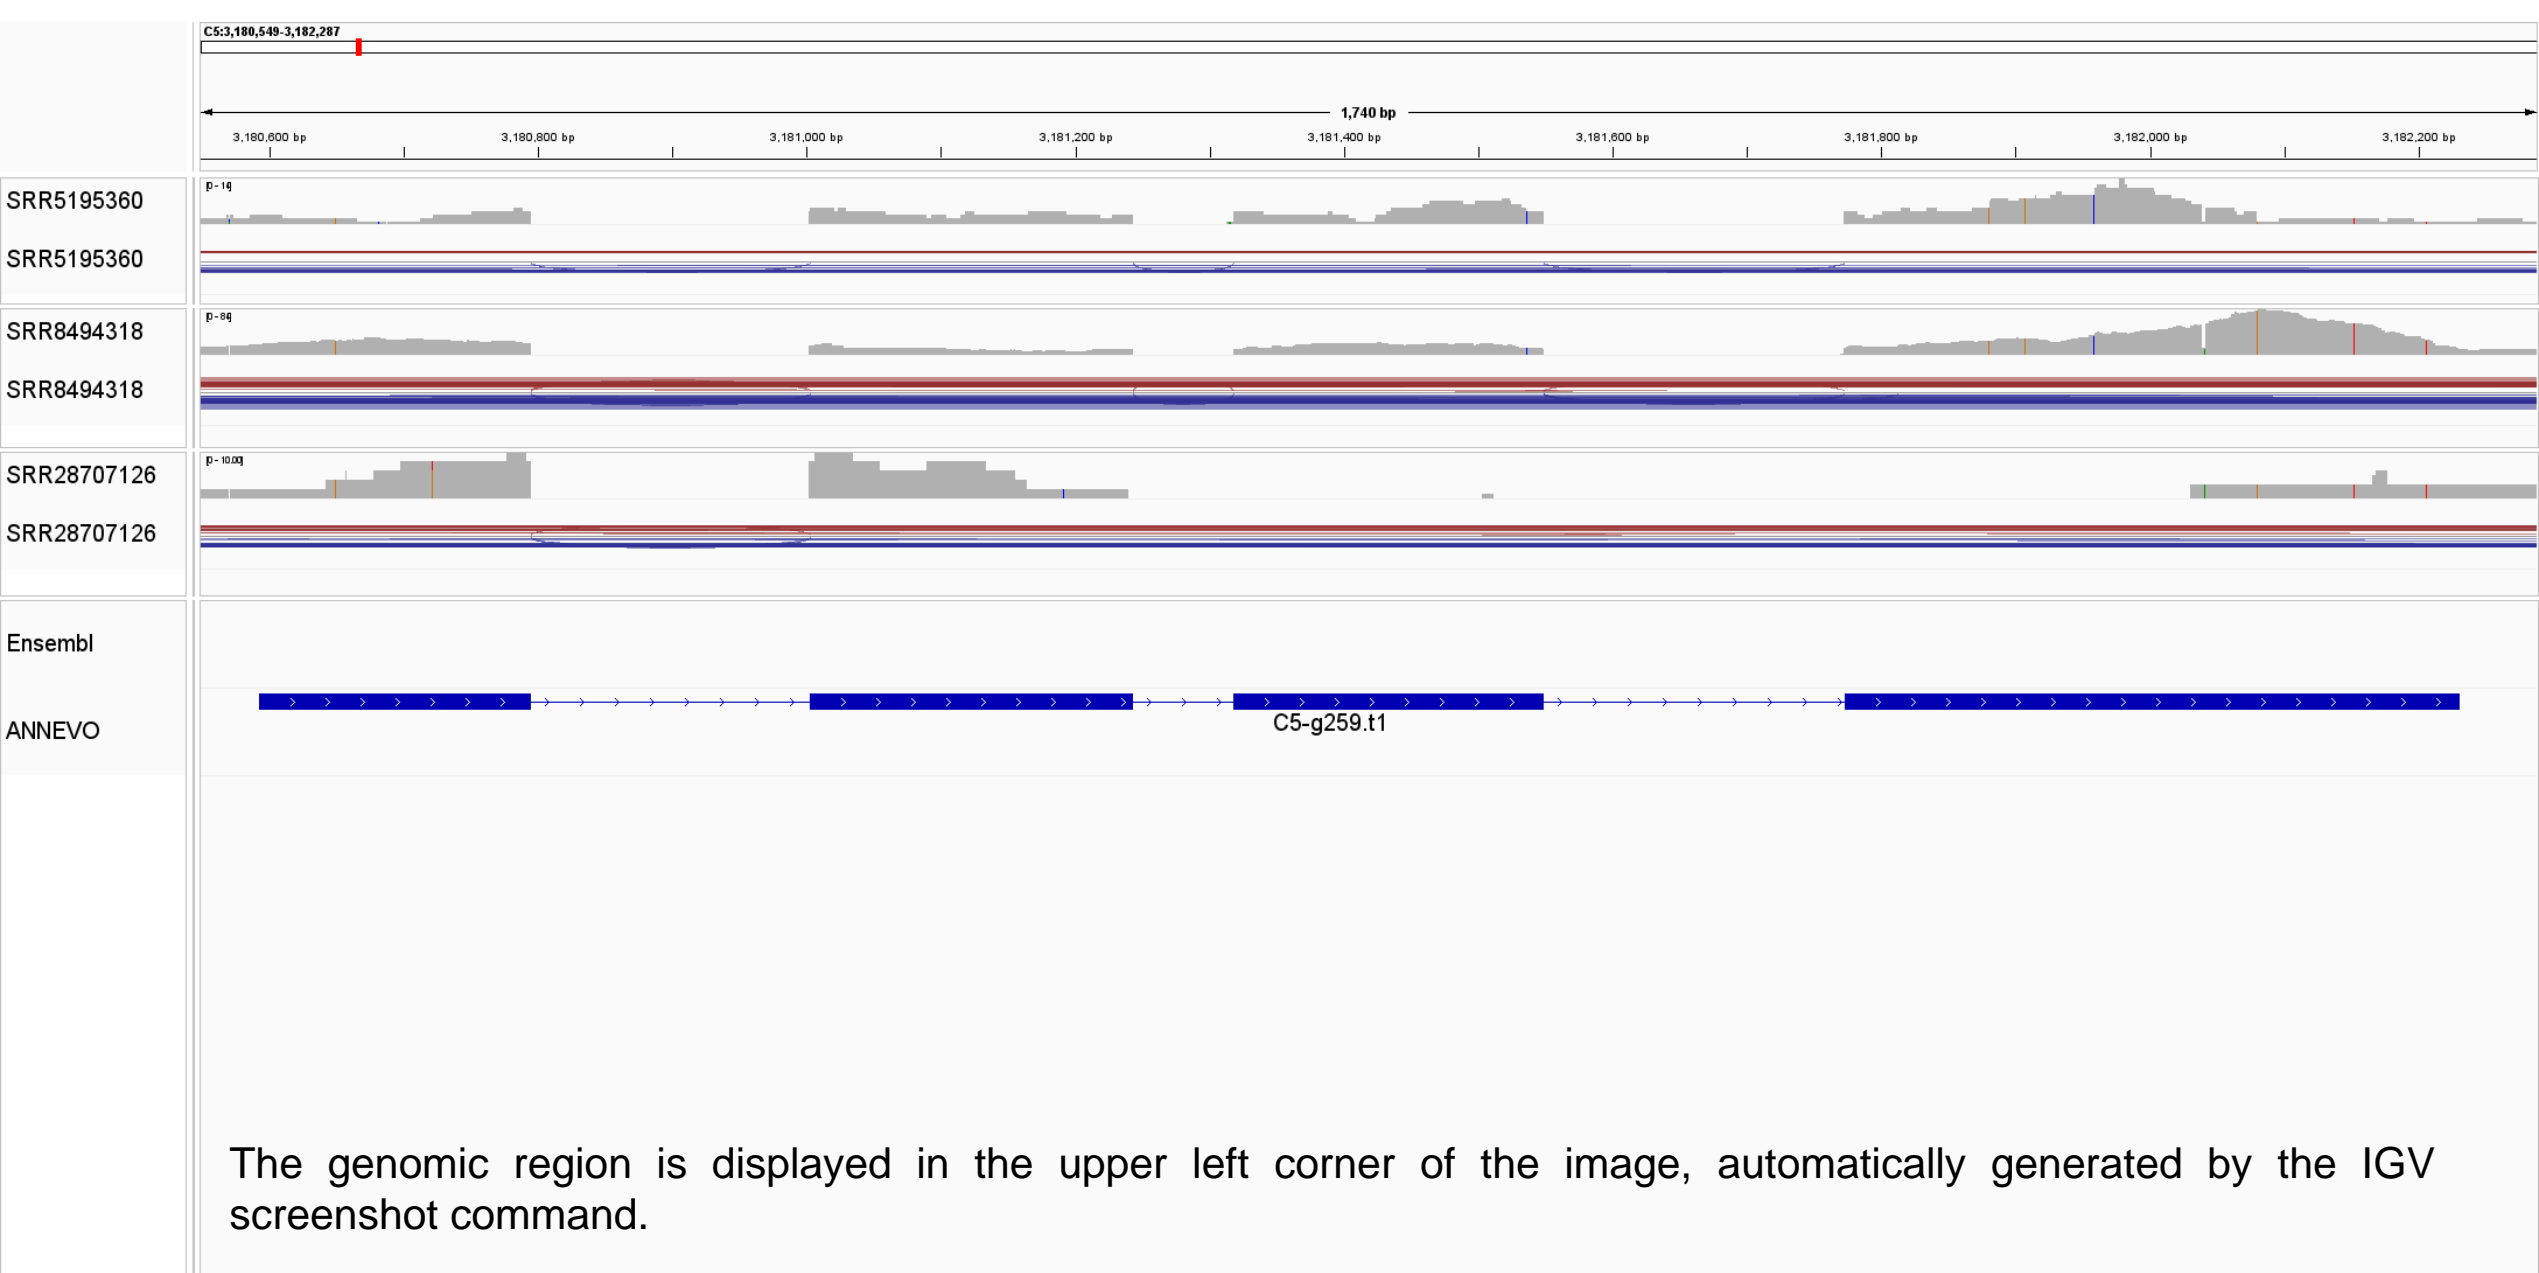

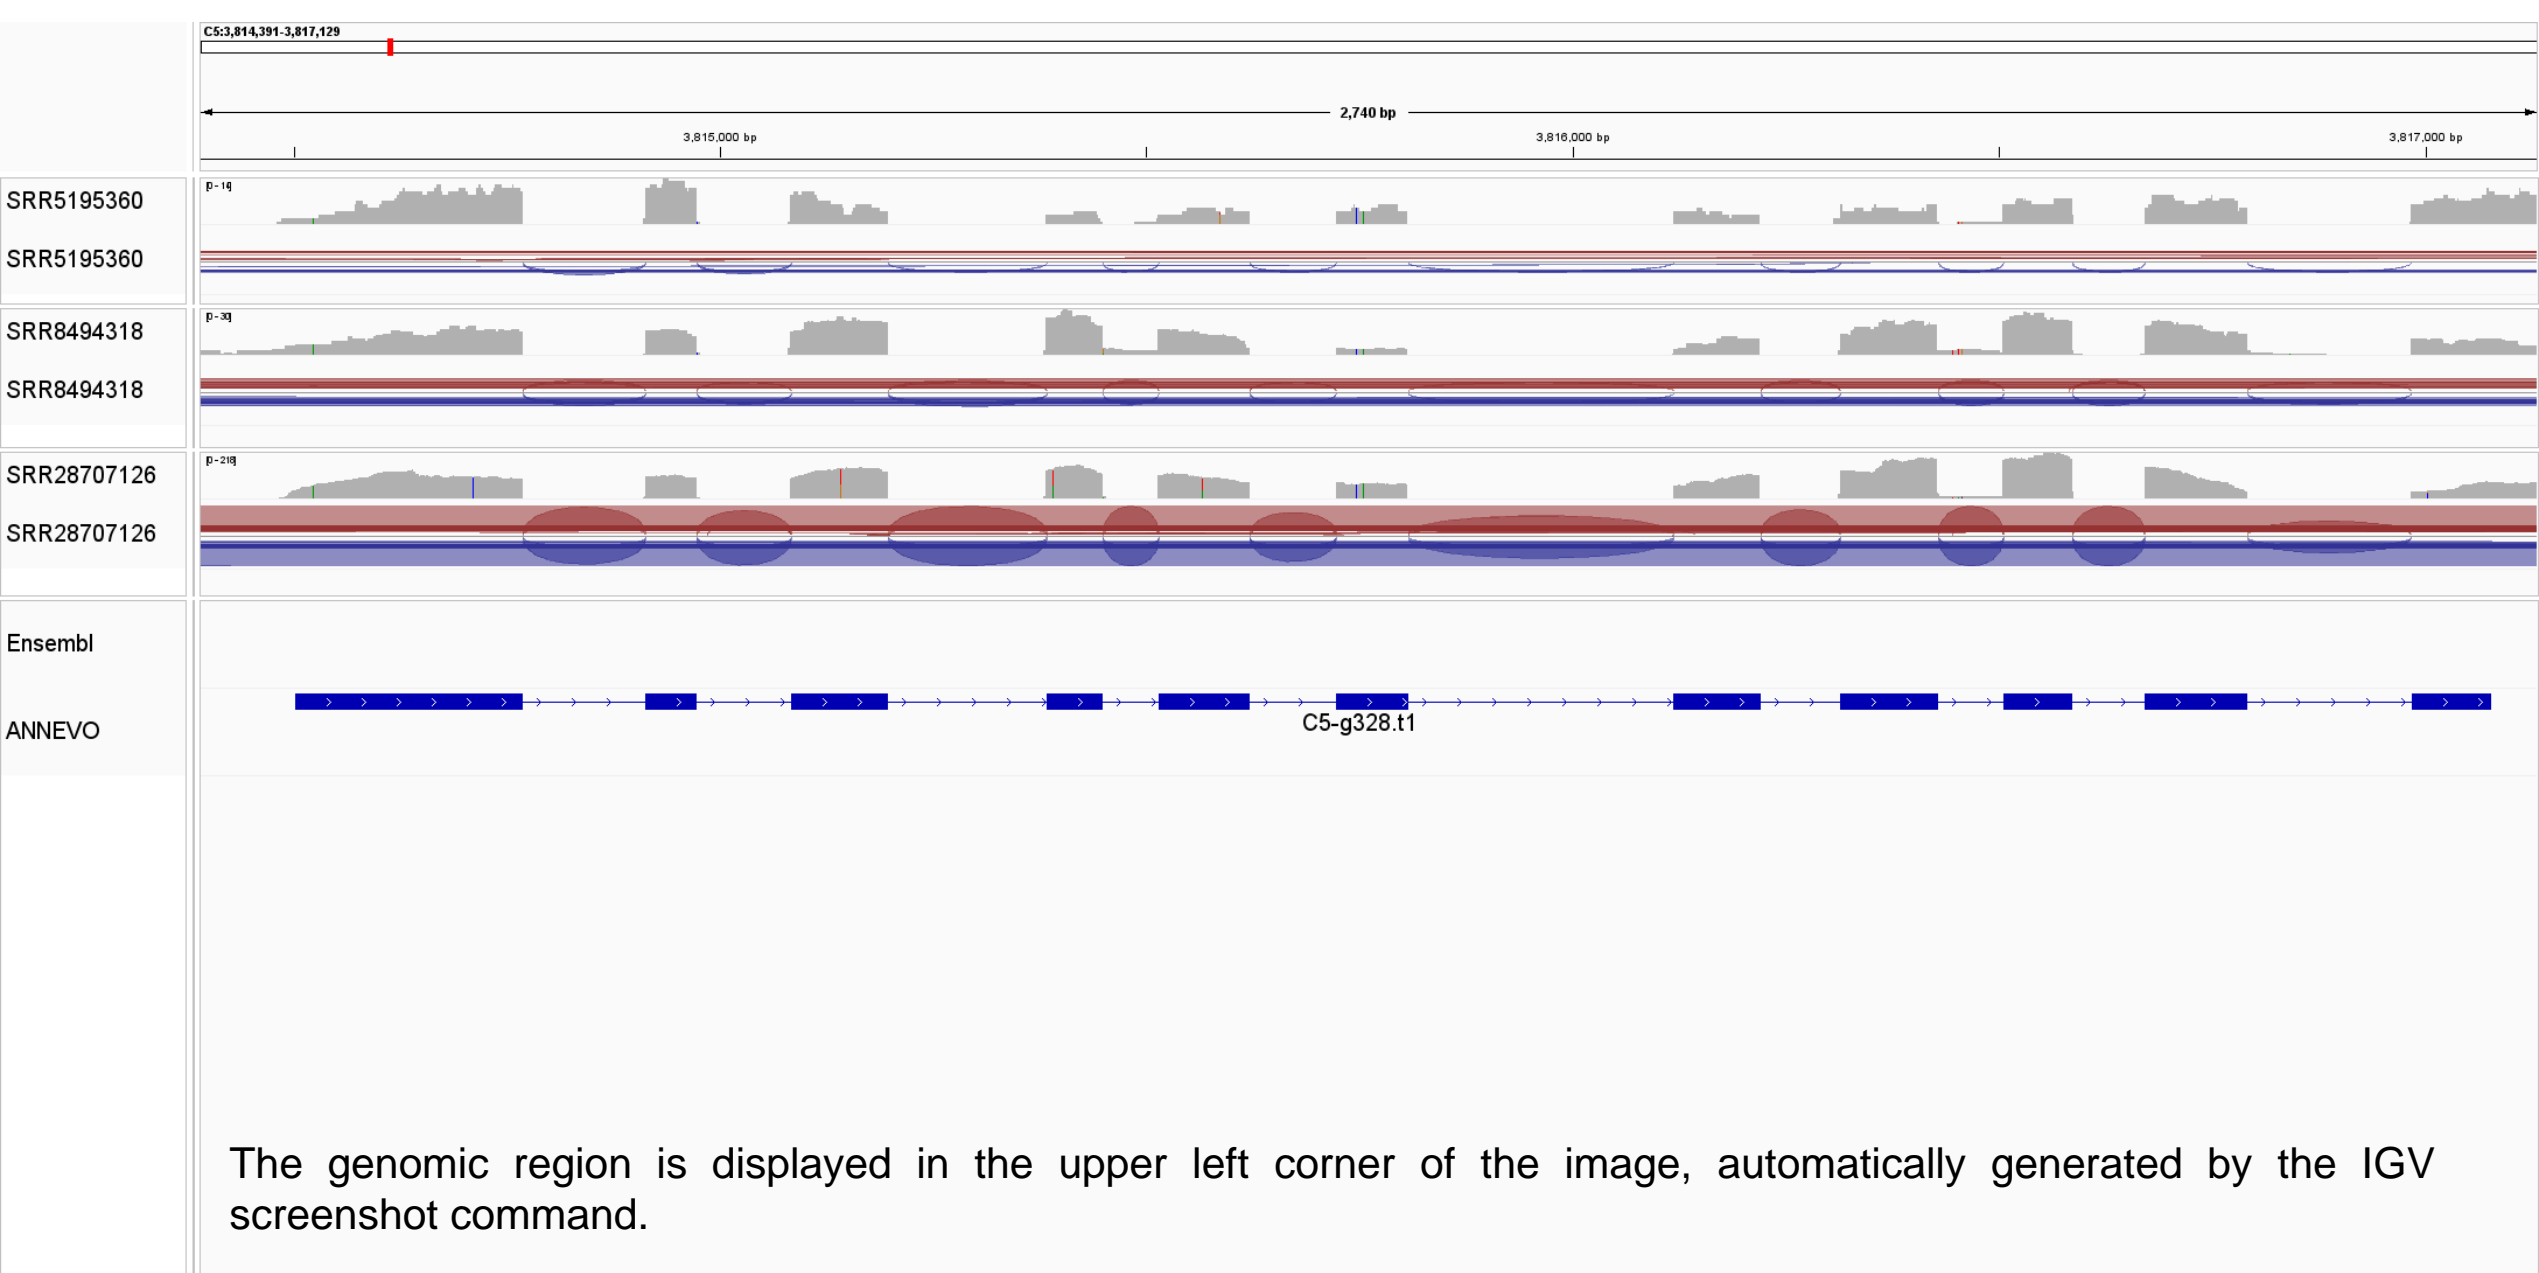

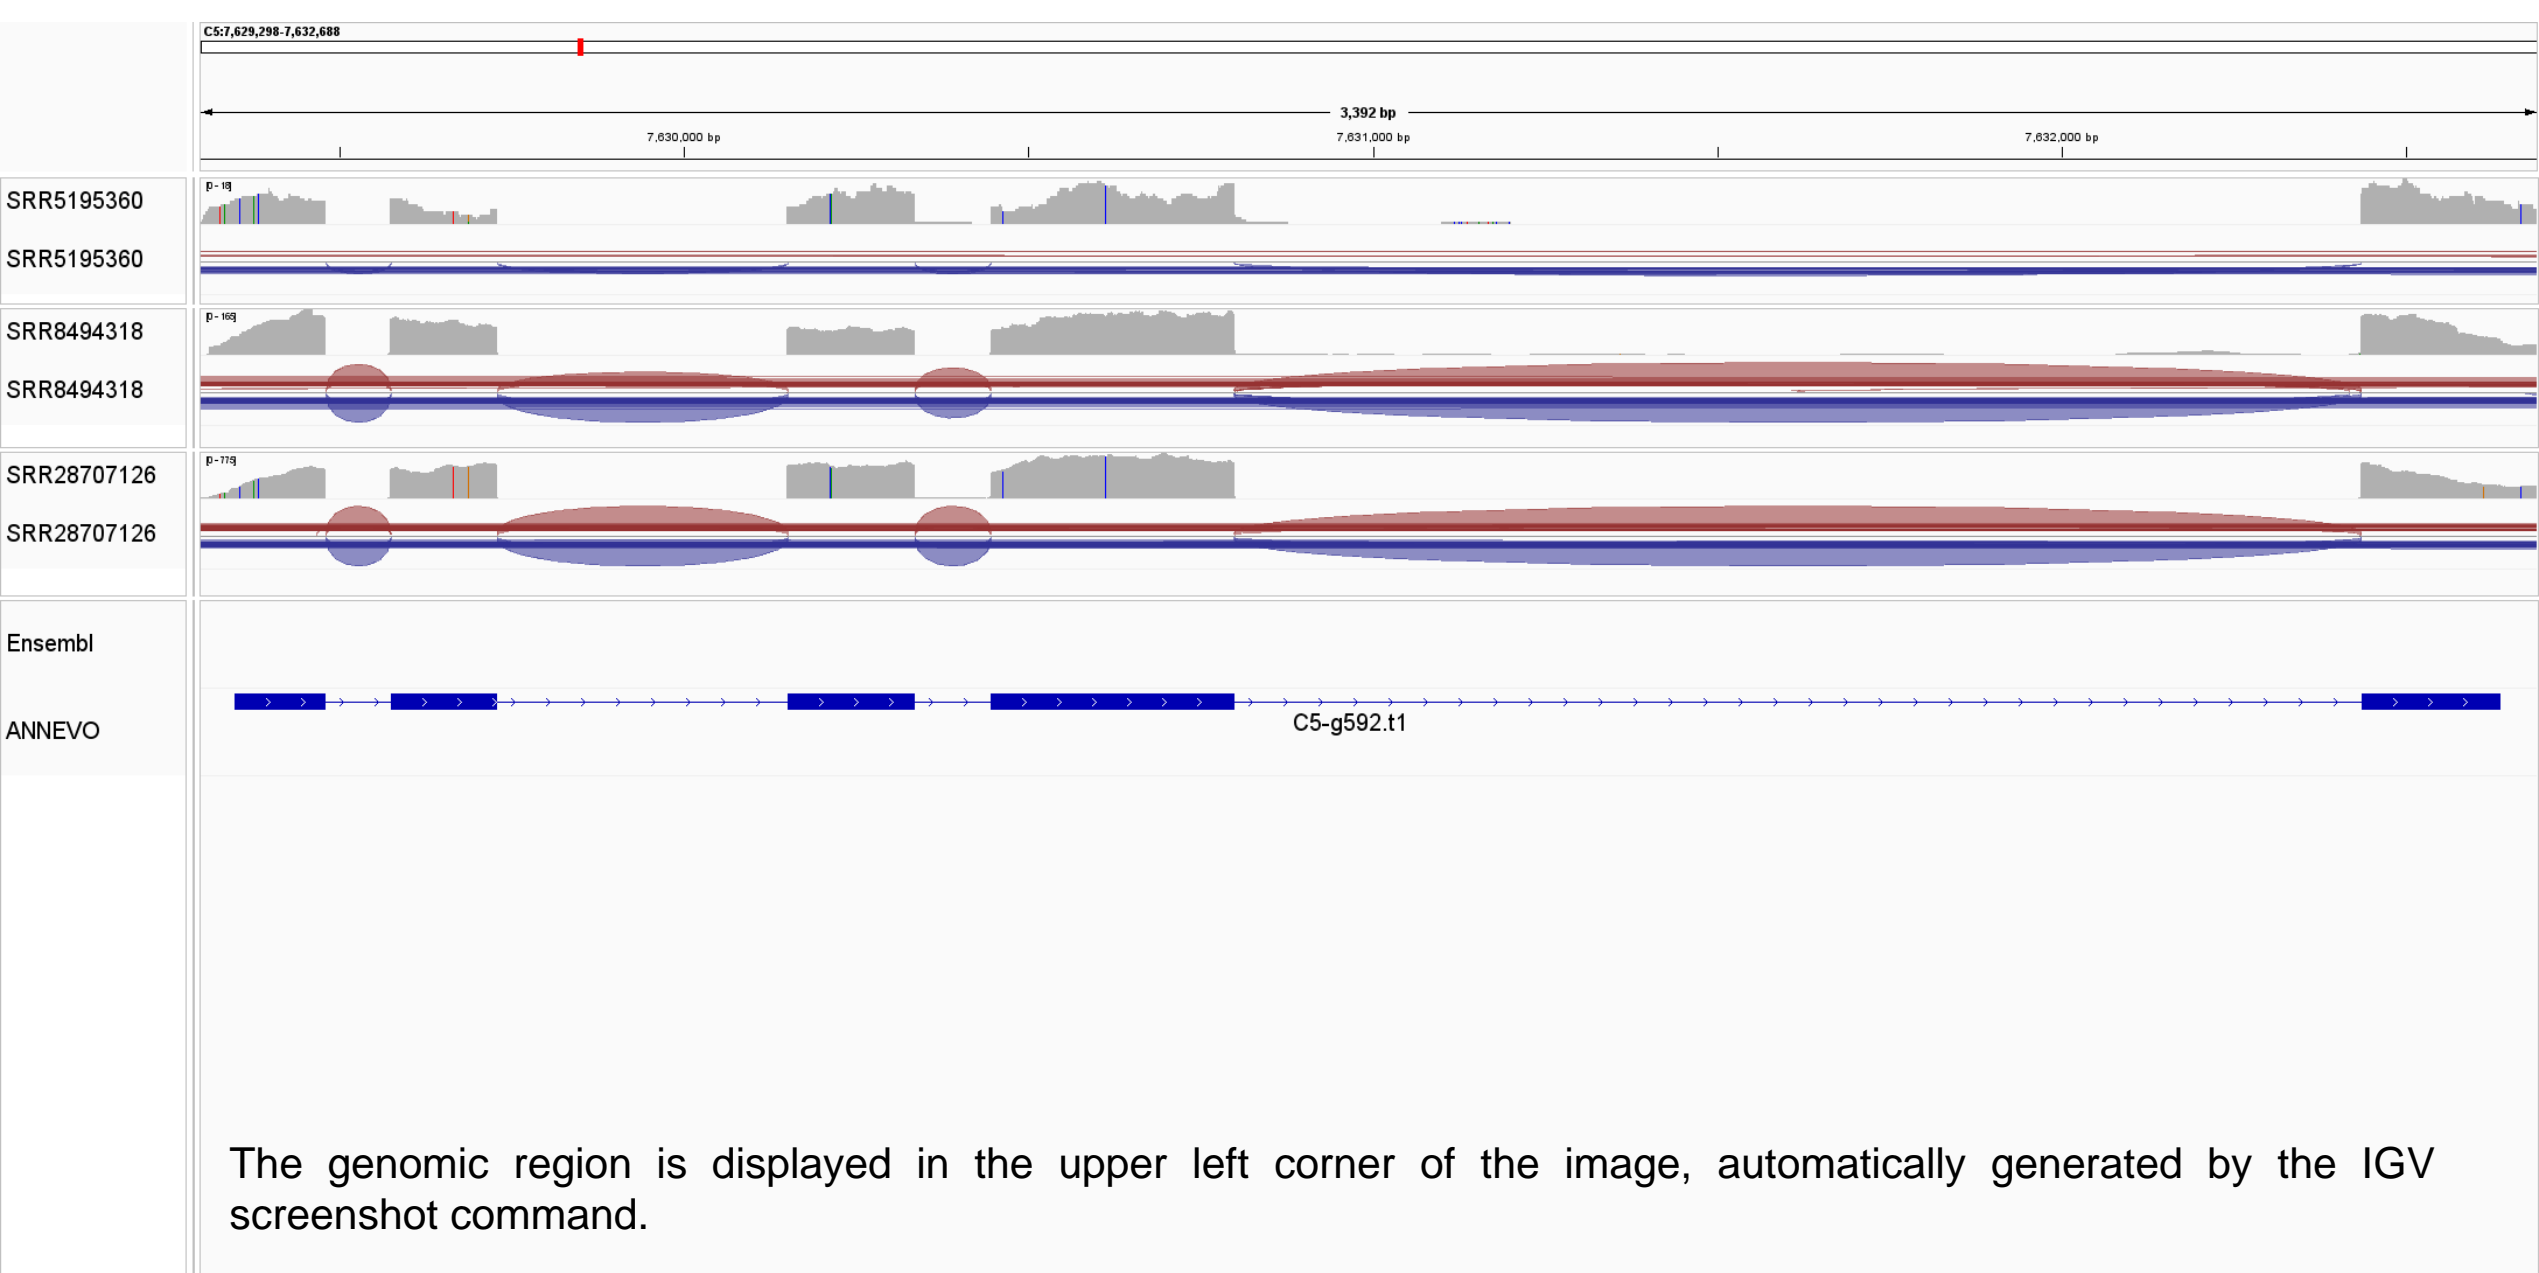

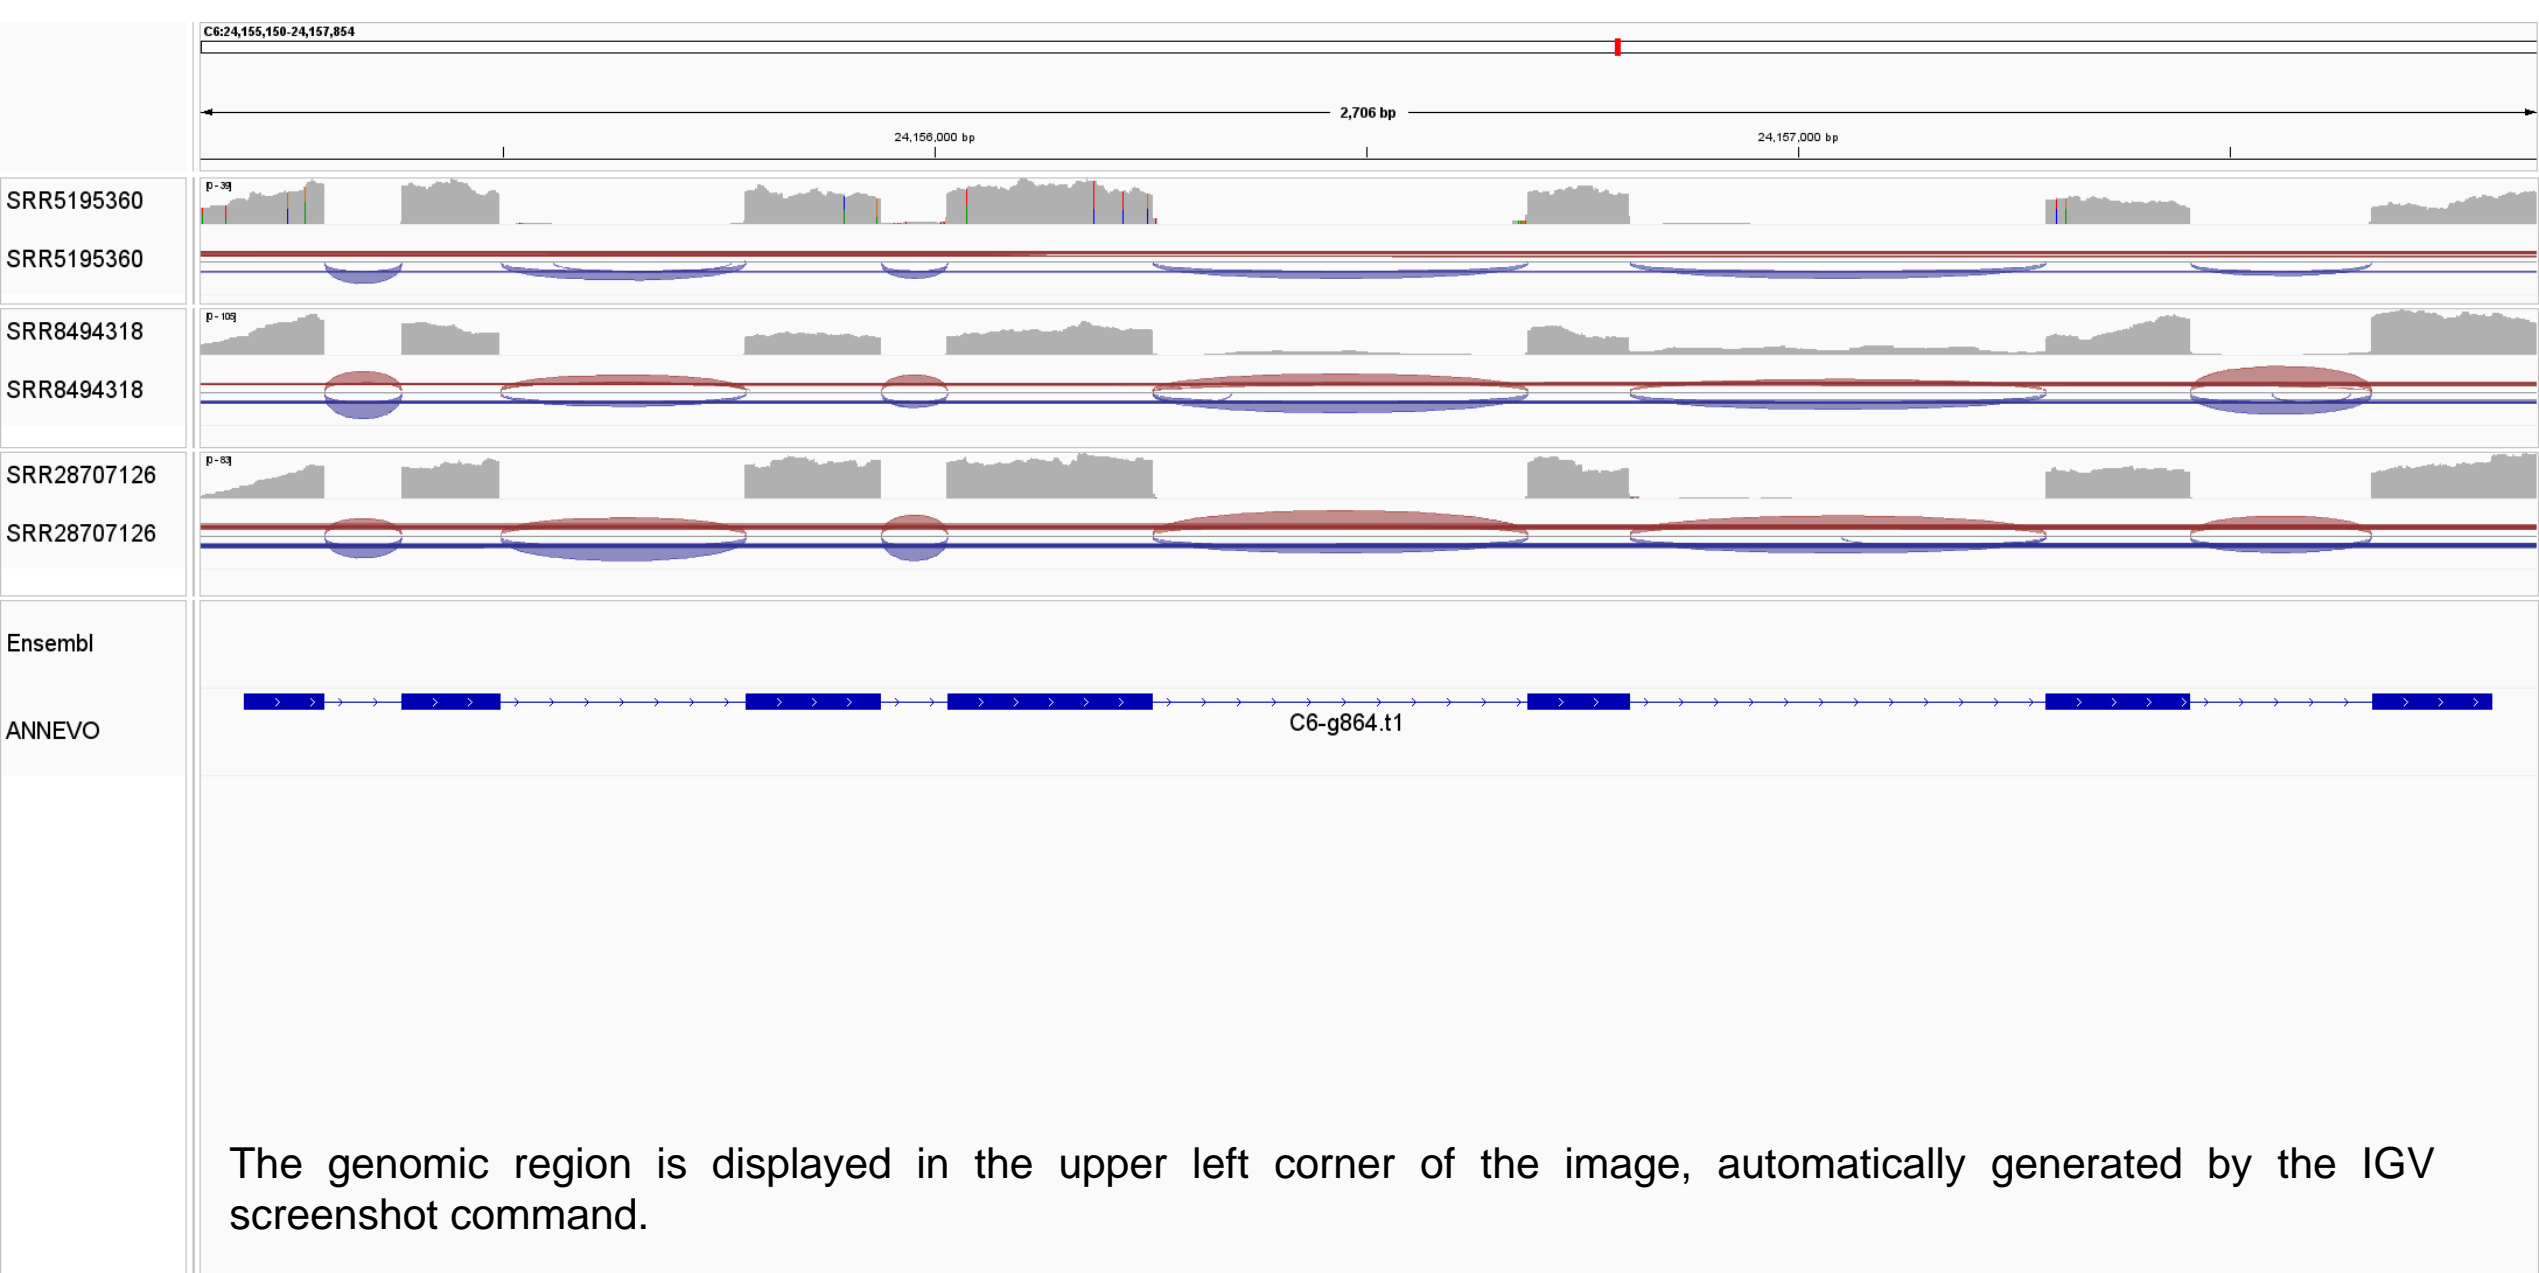



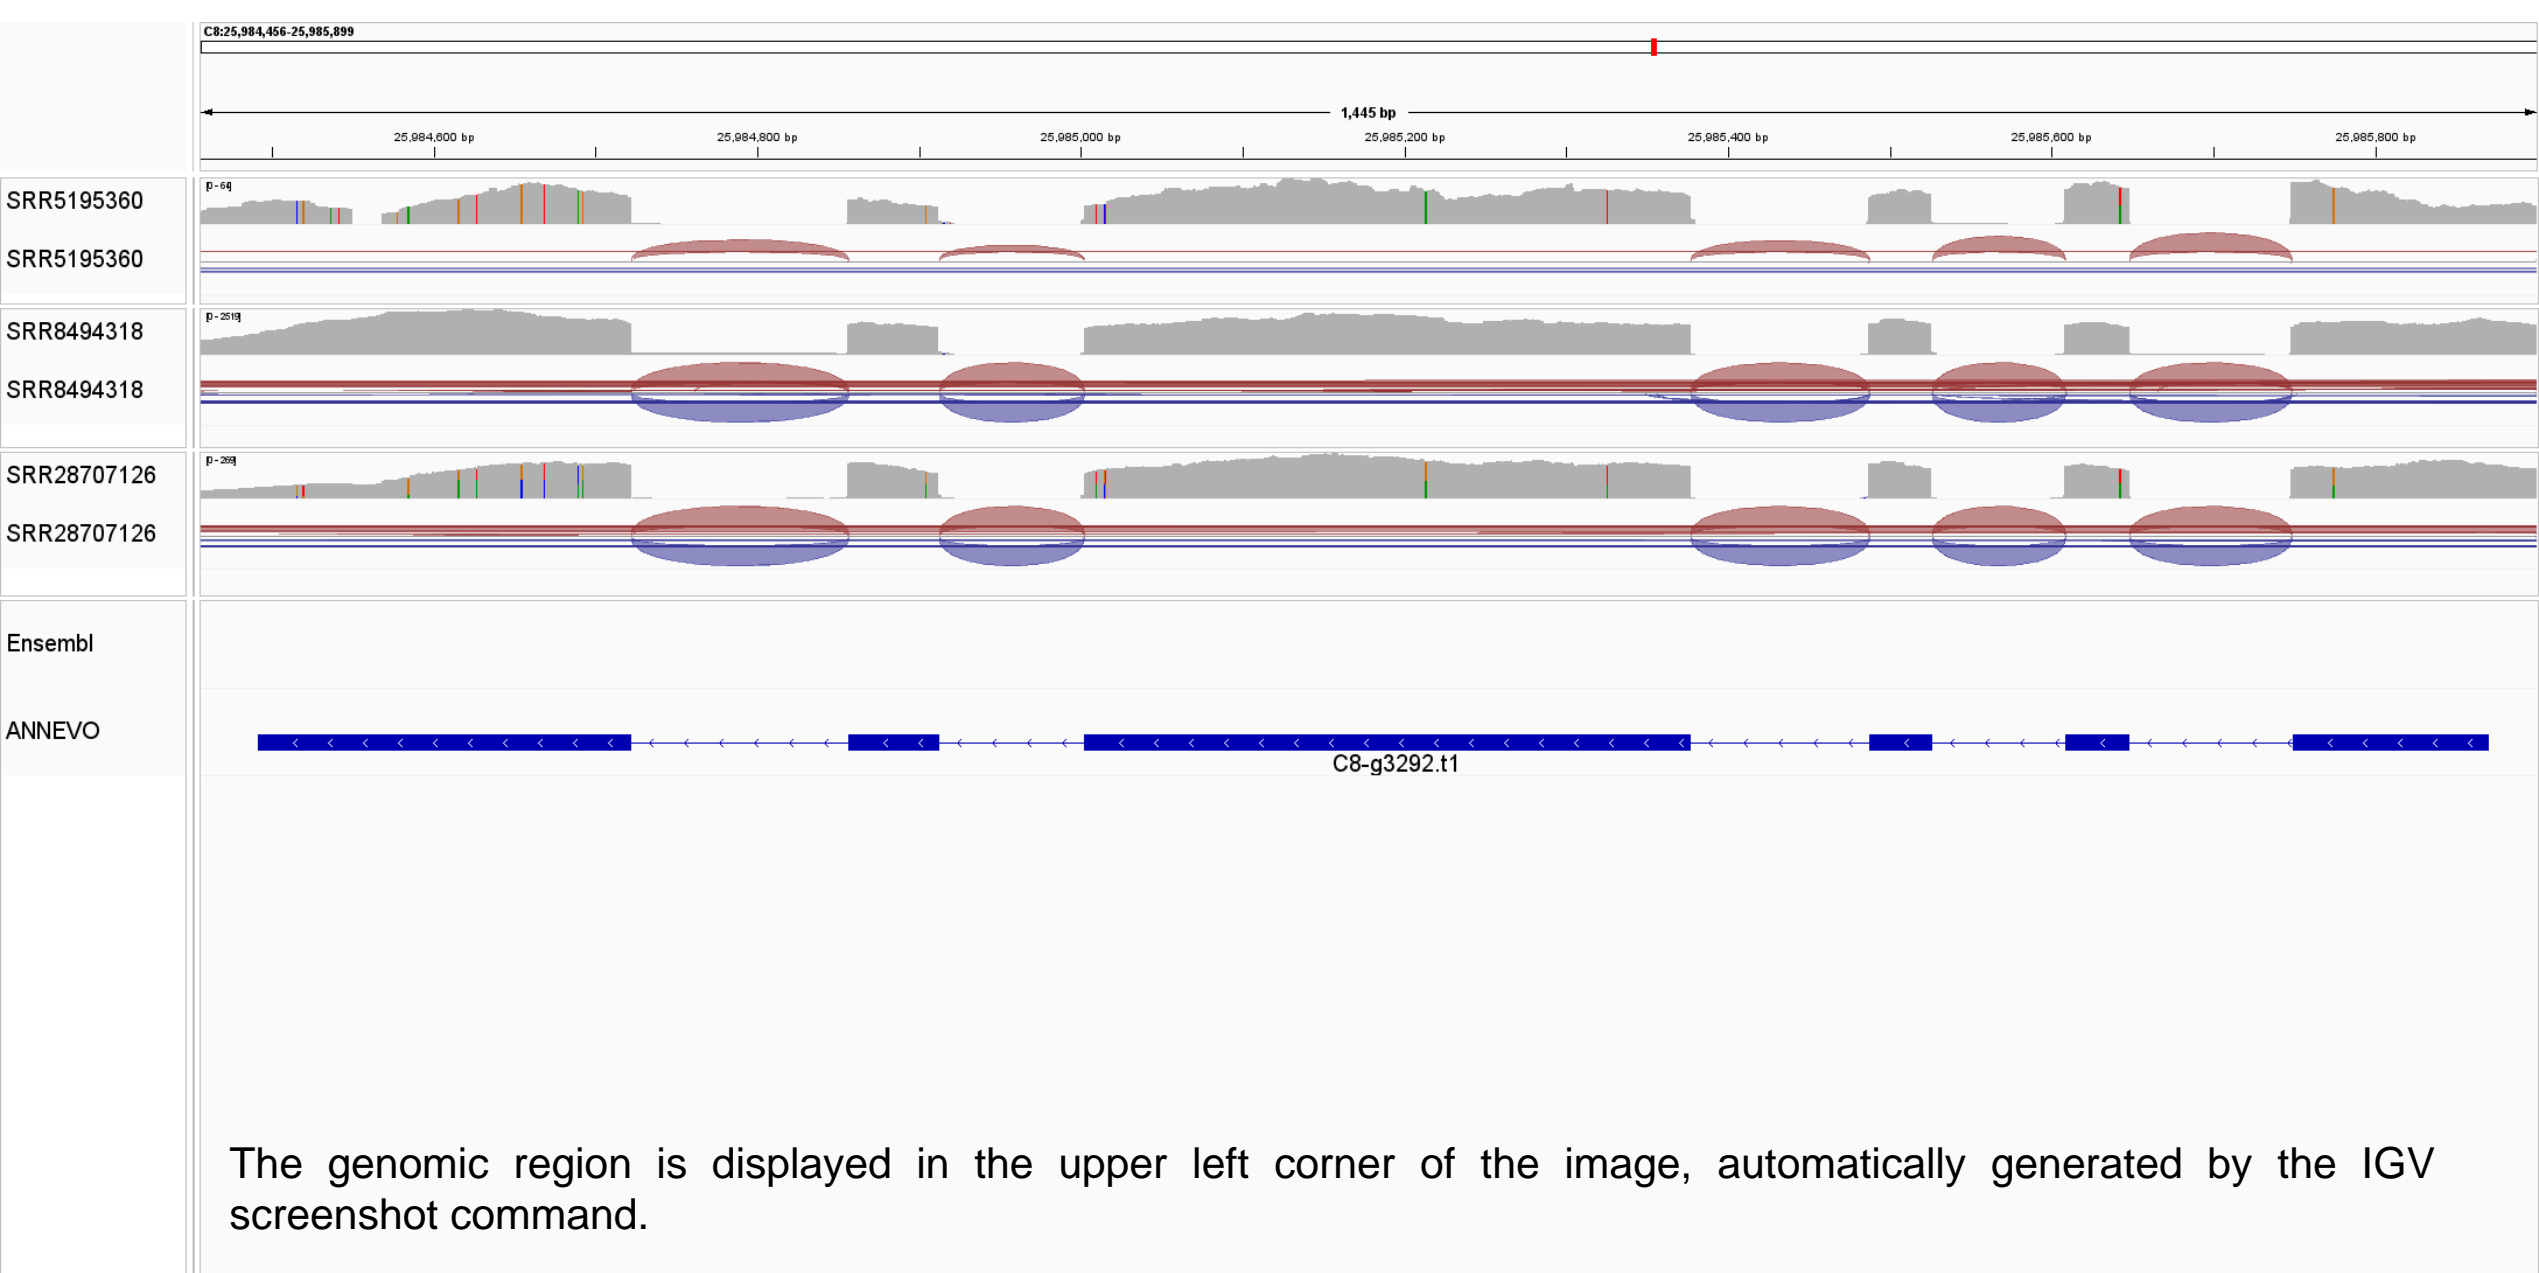

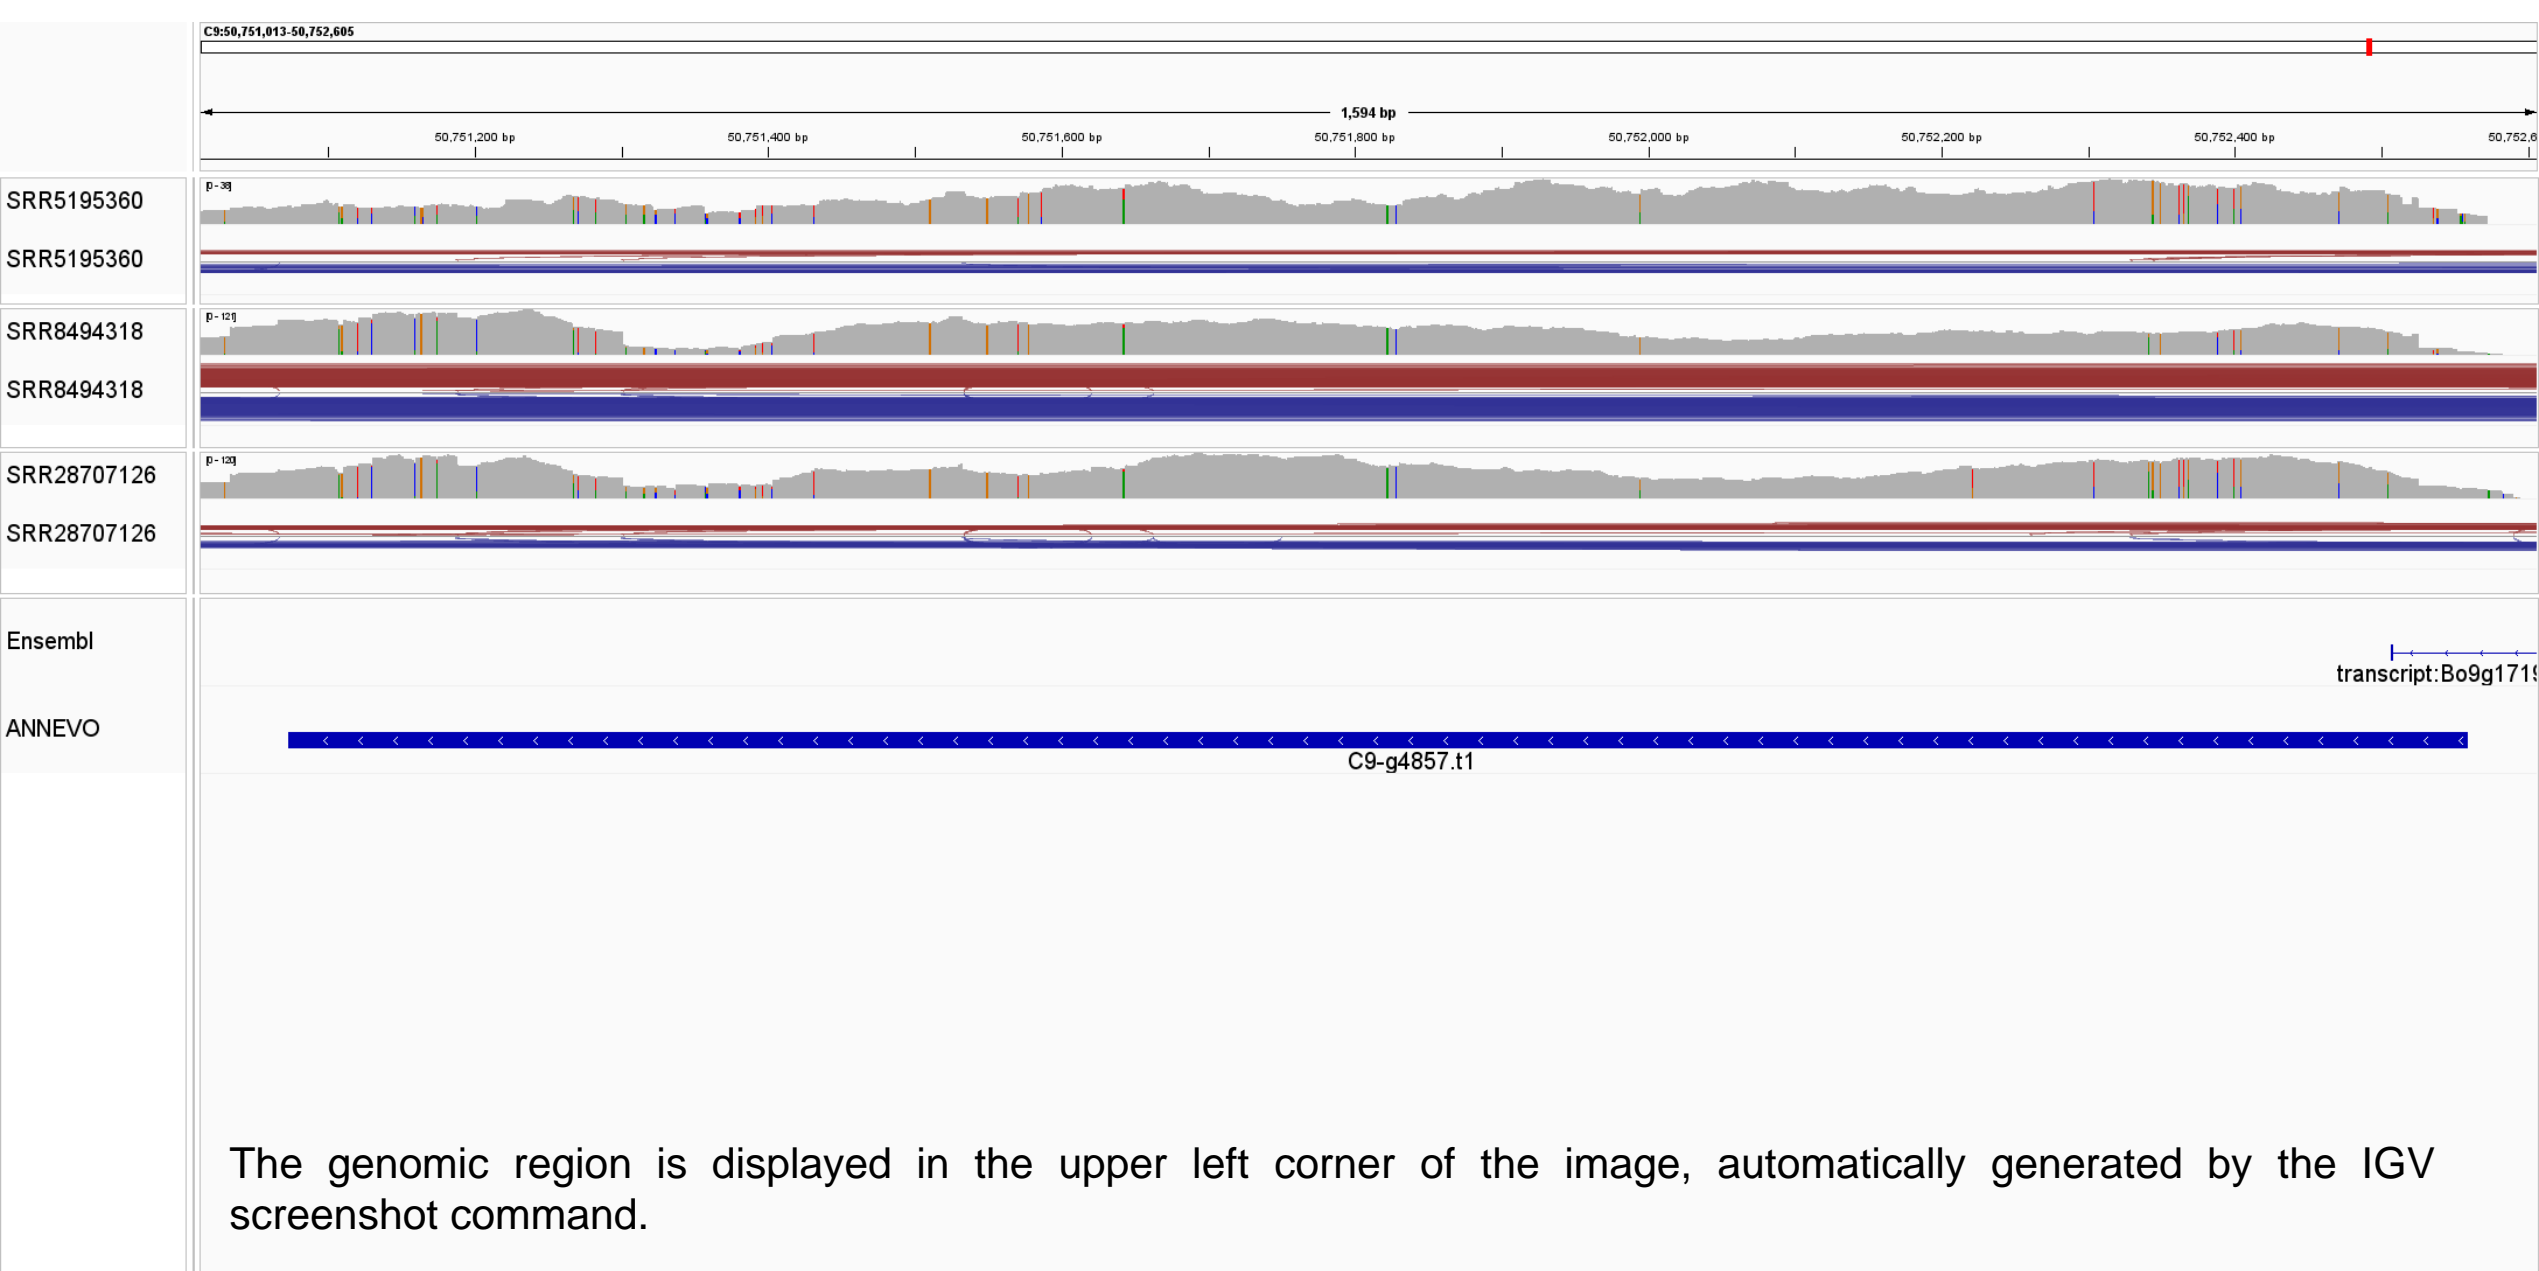

Incomplete Gene in Ensembl

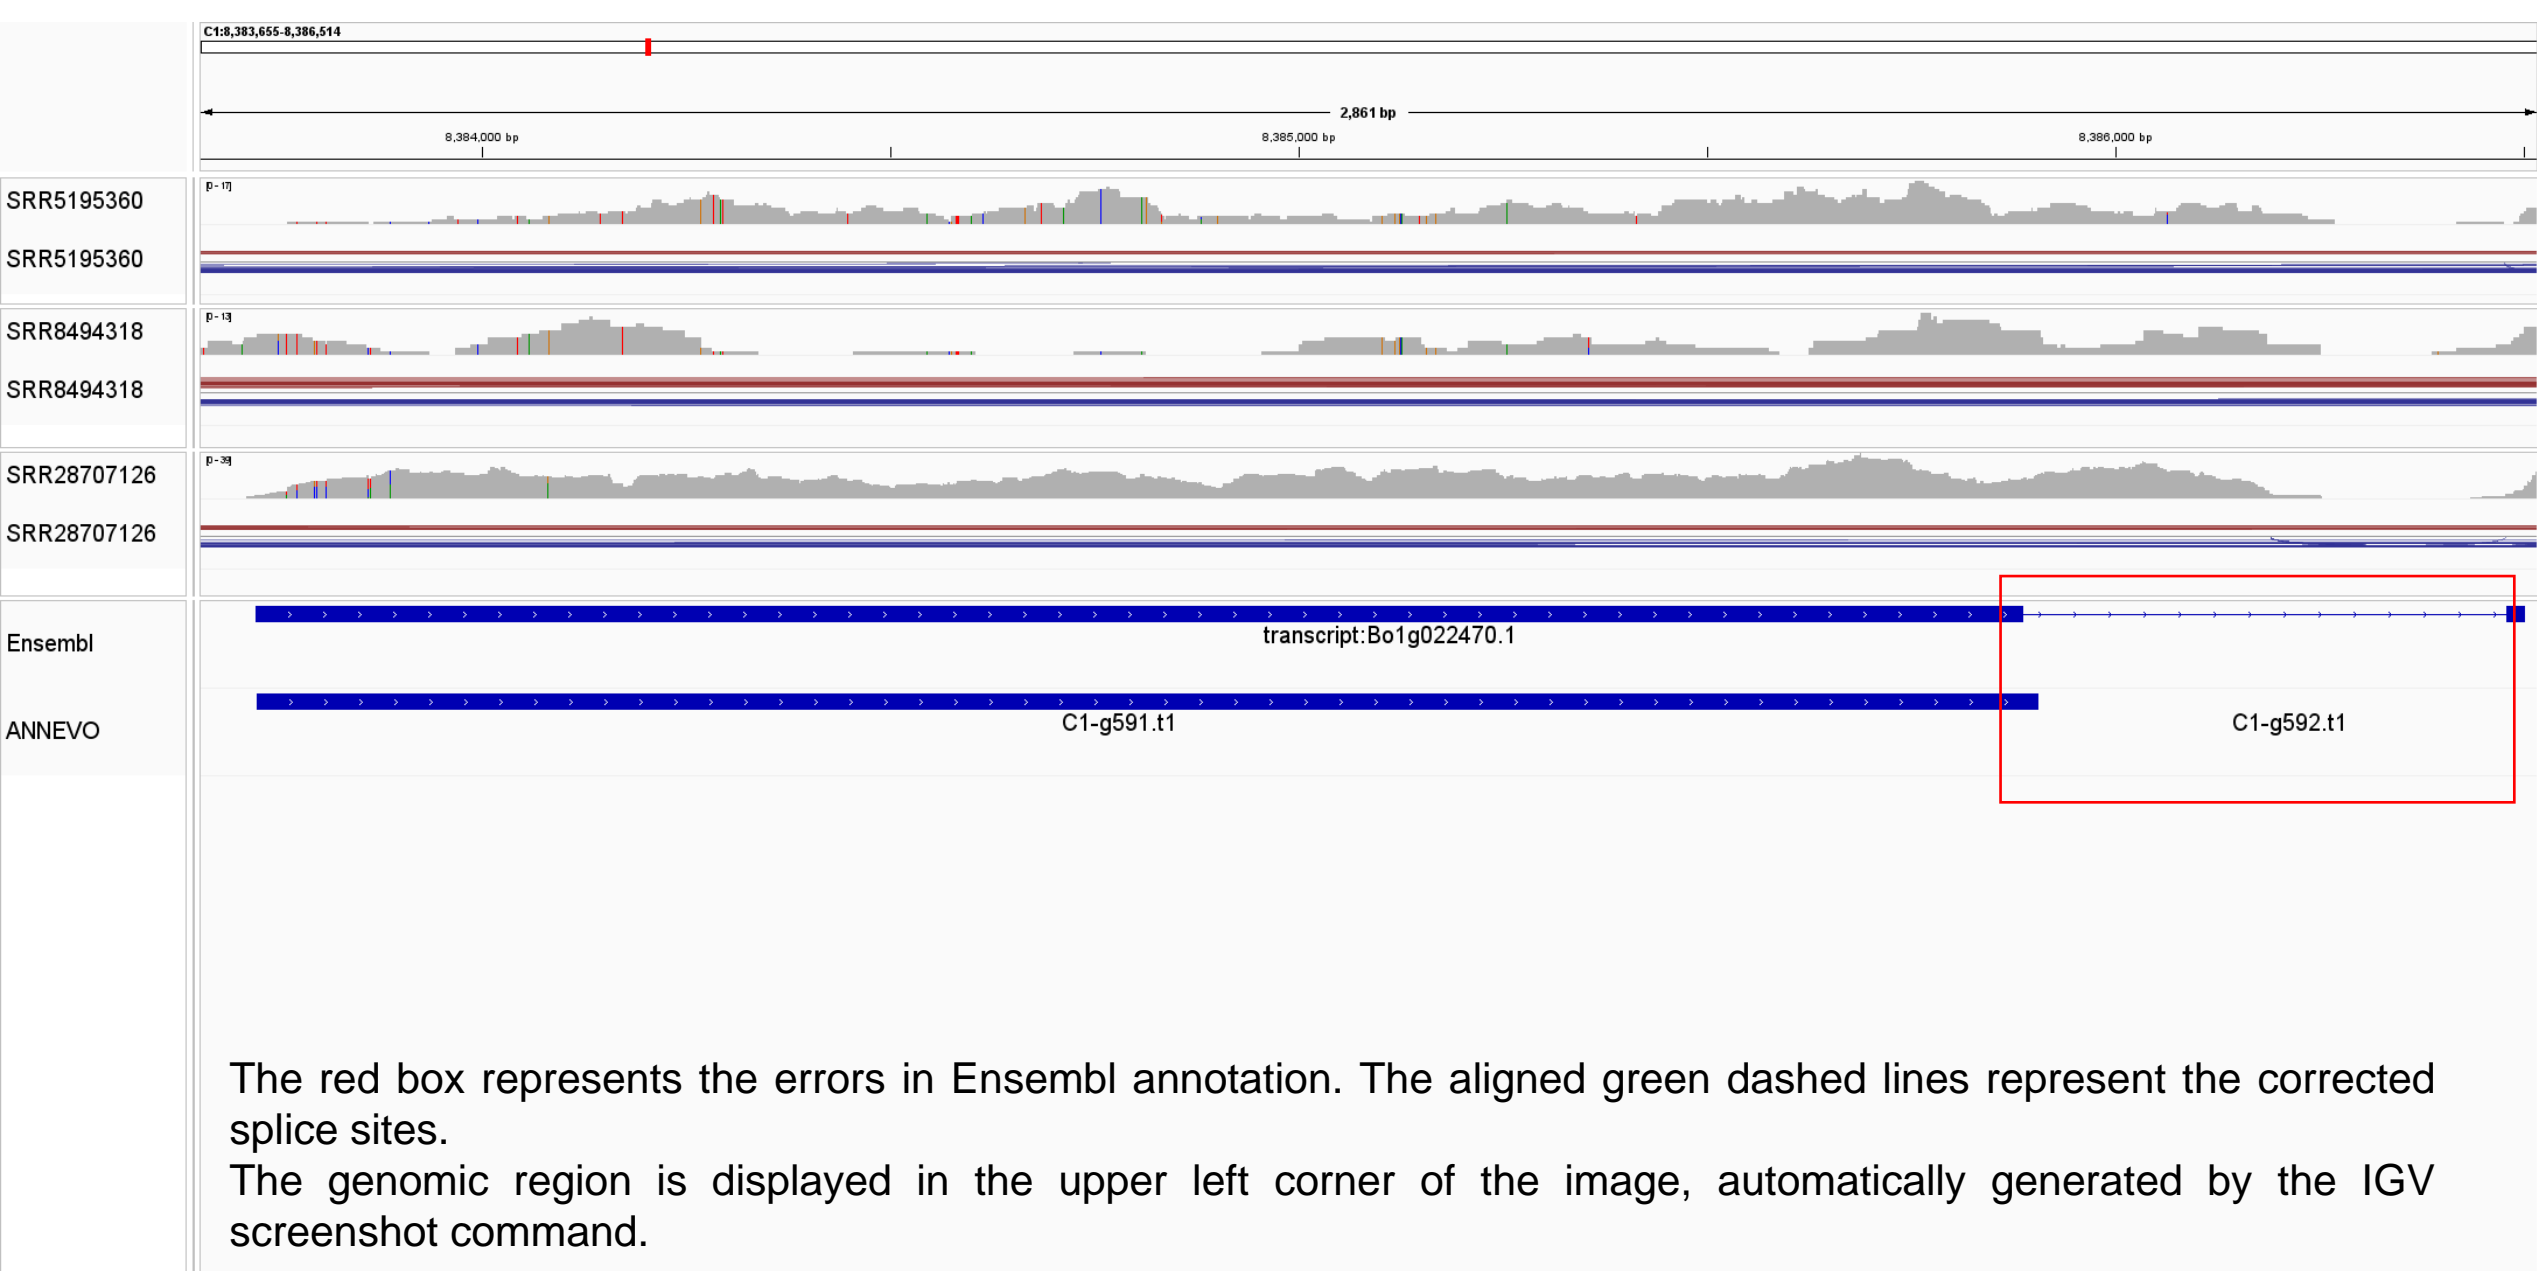

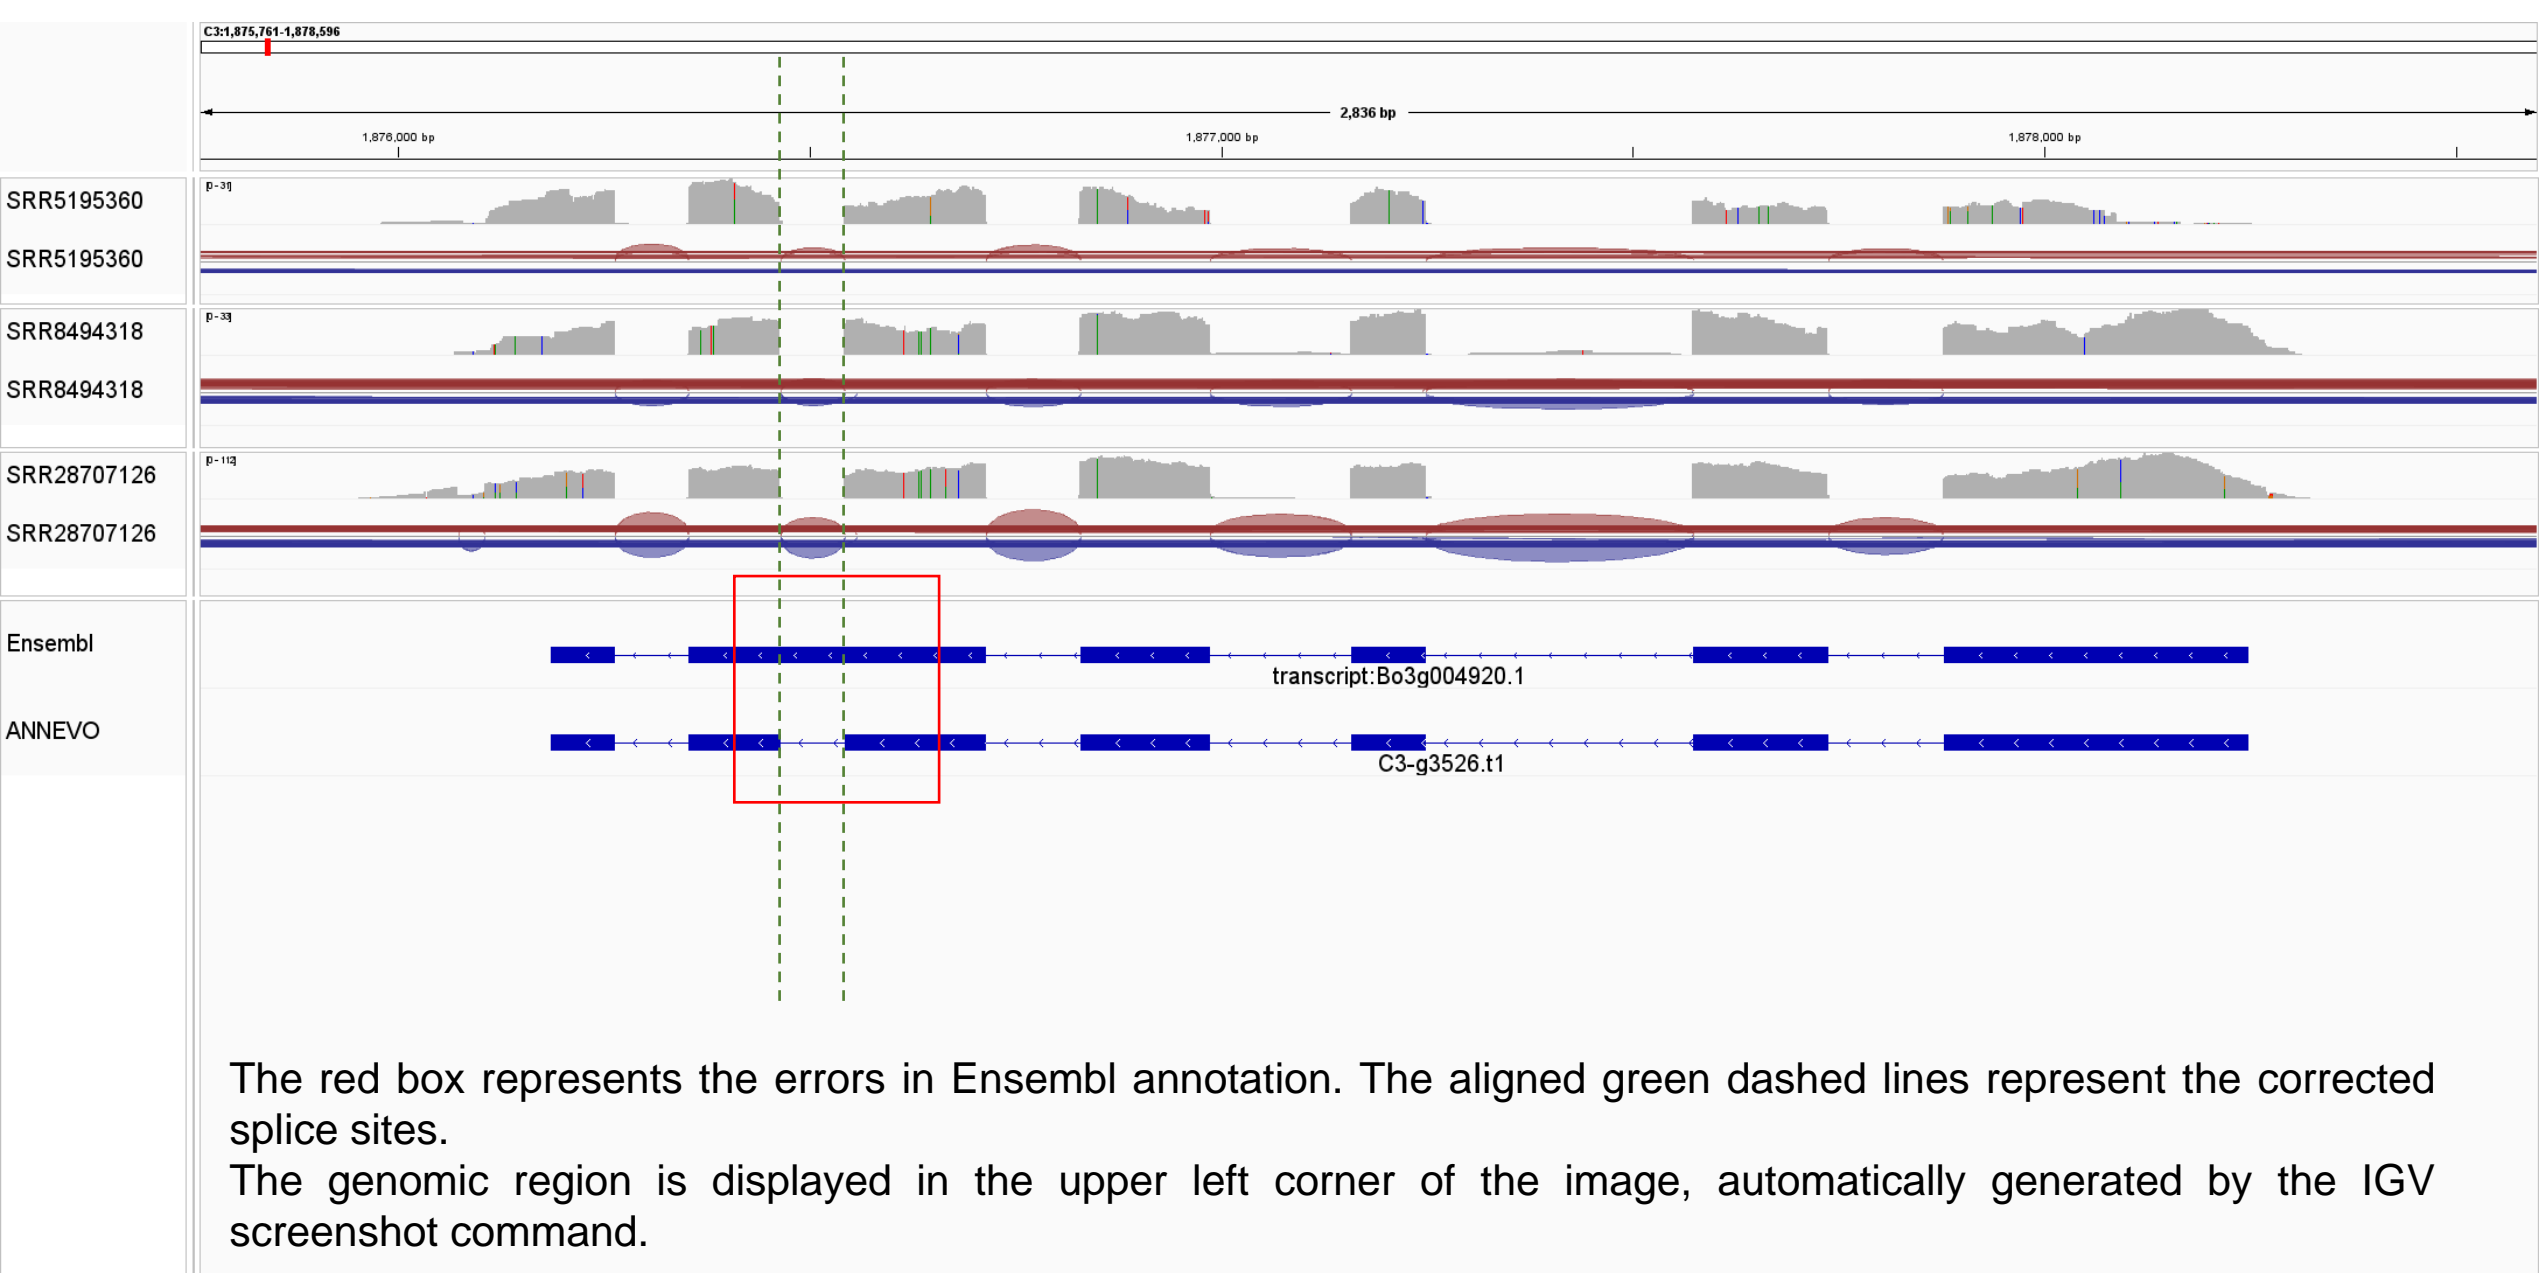

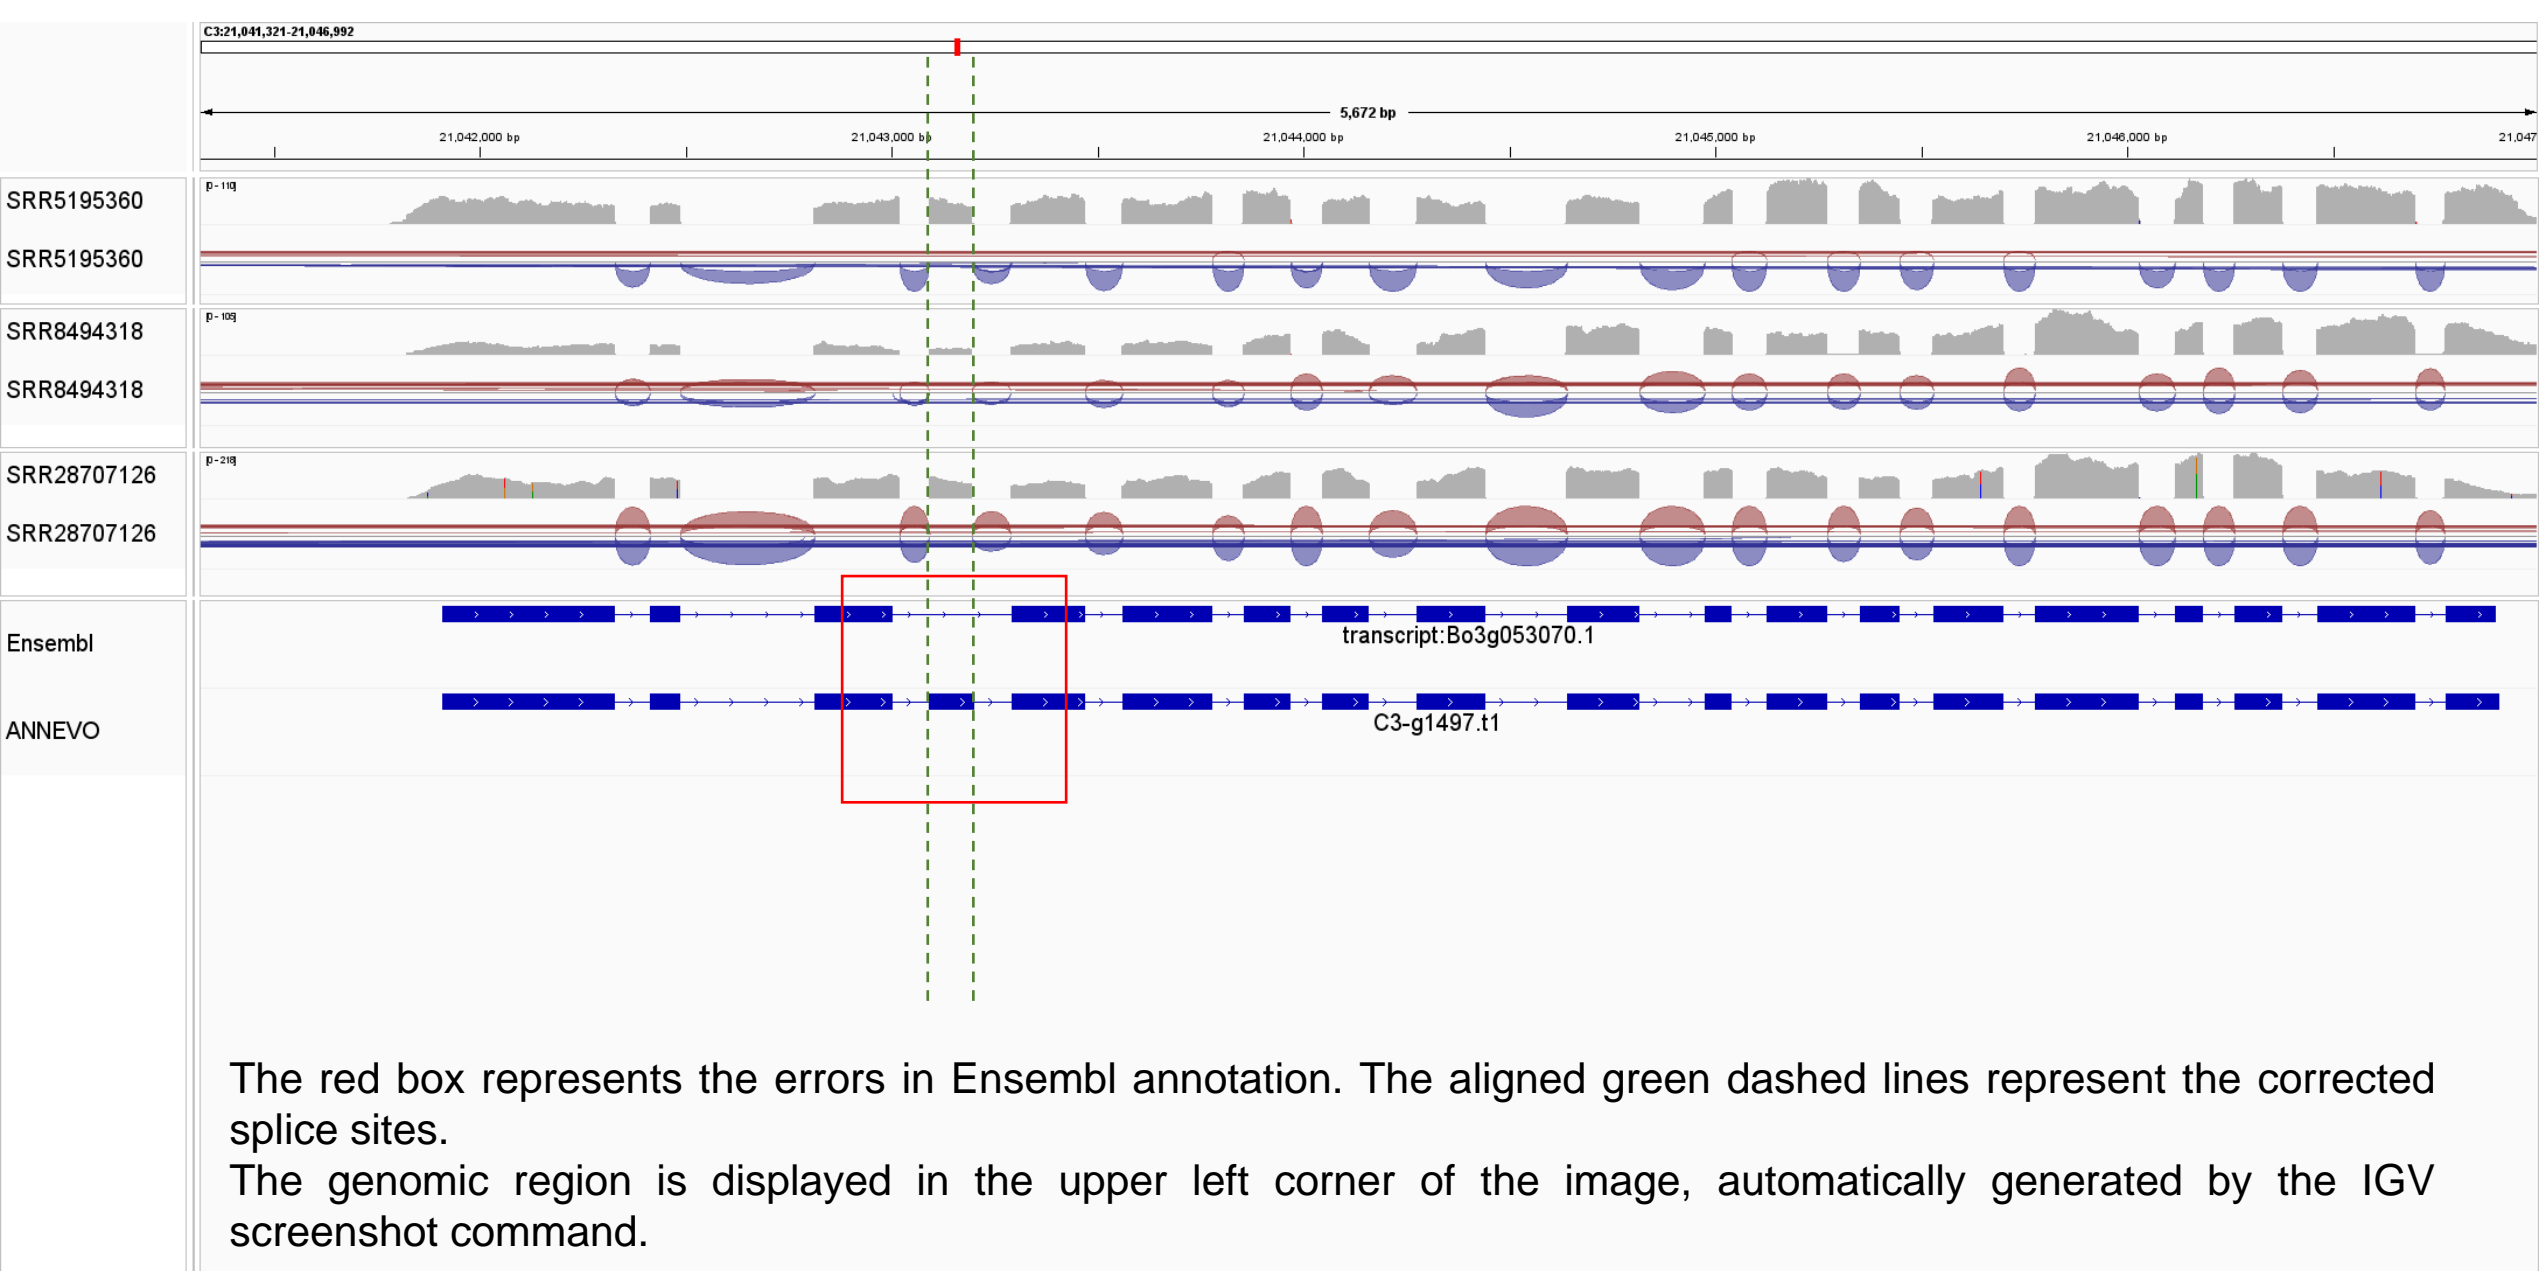

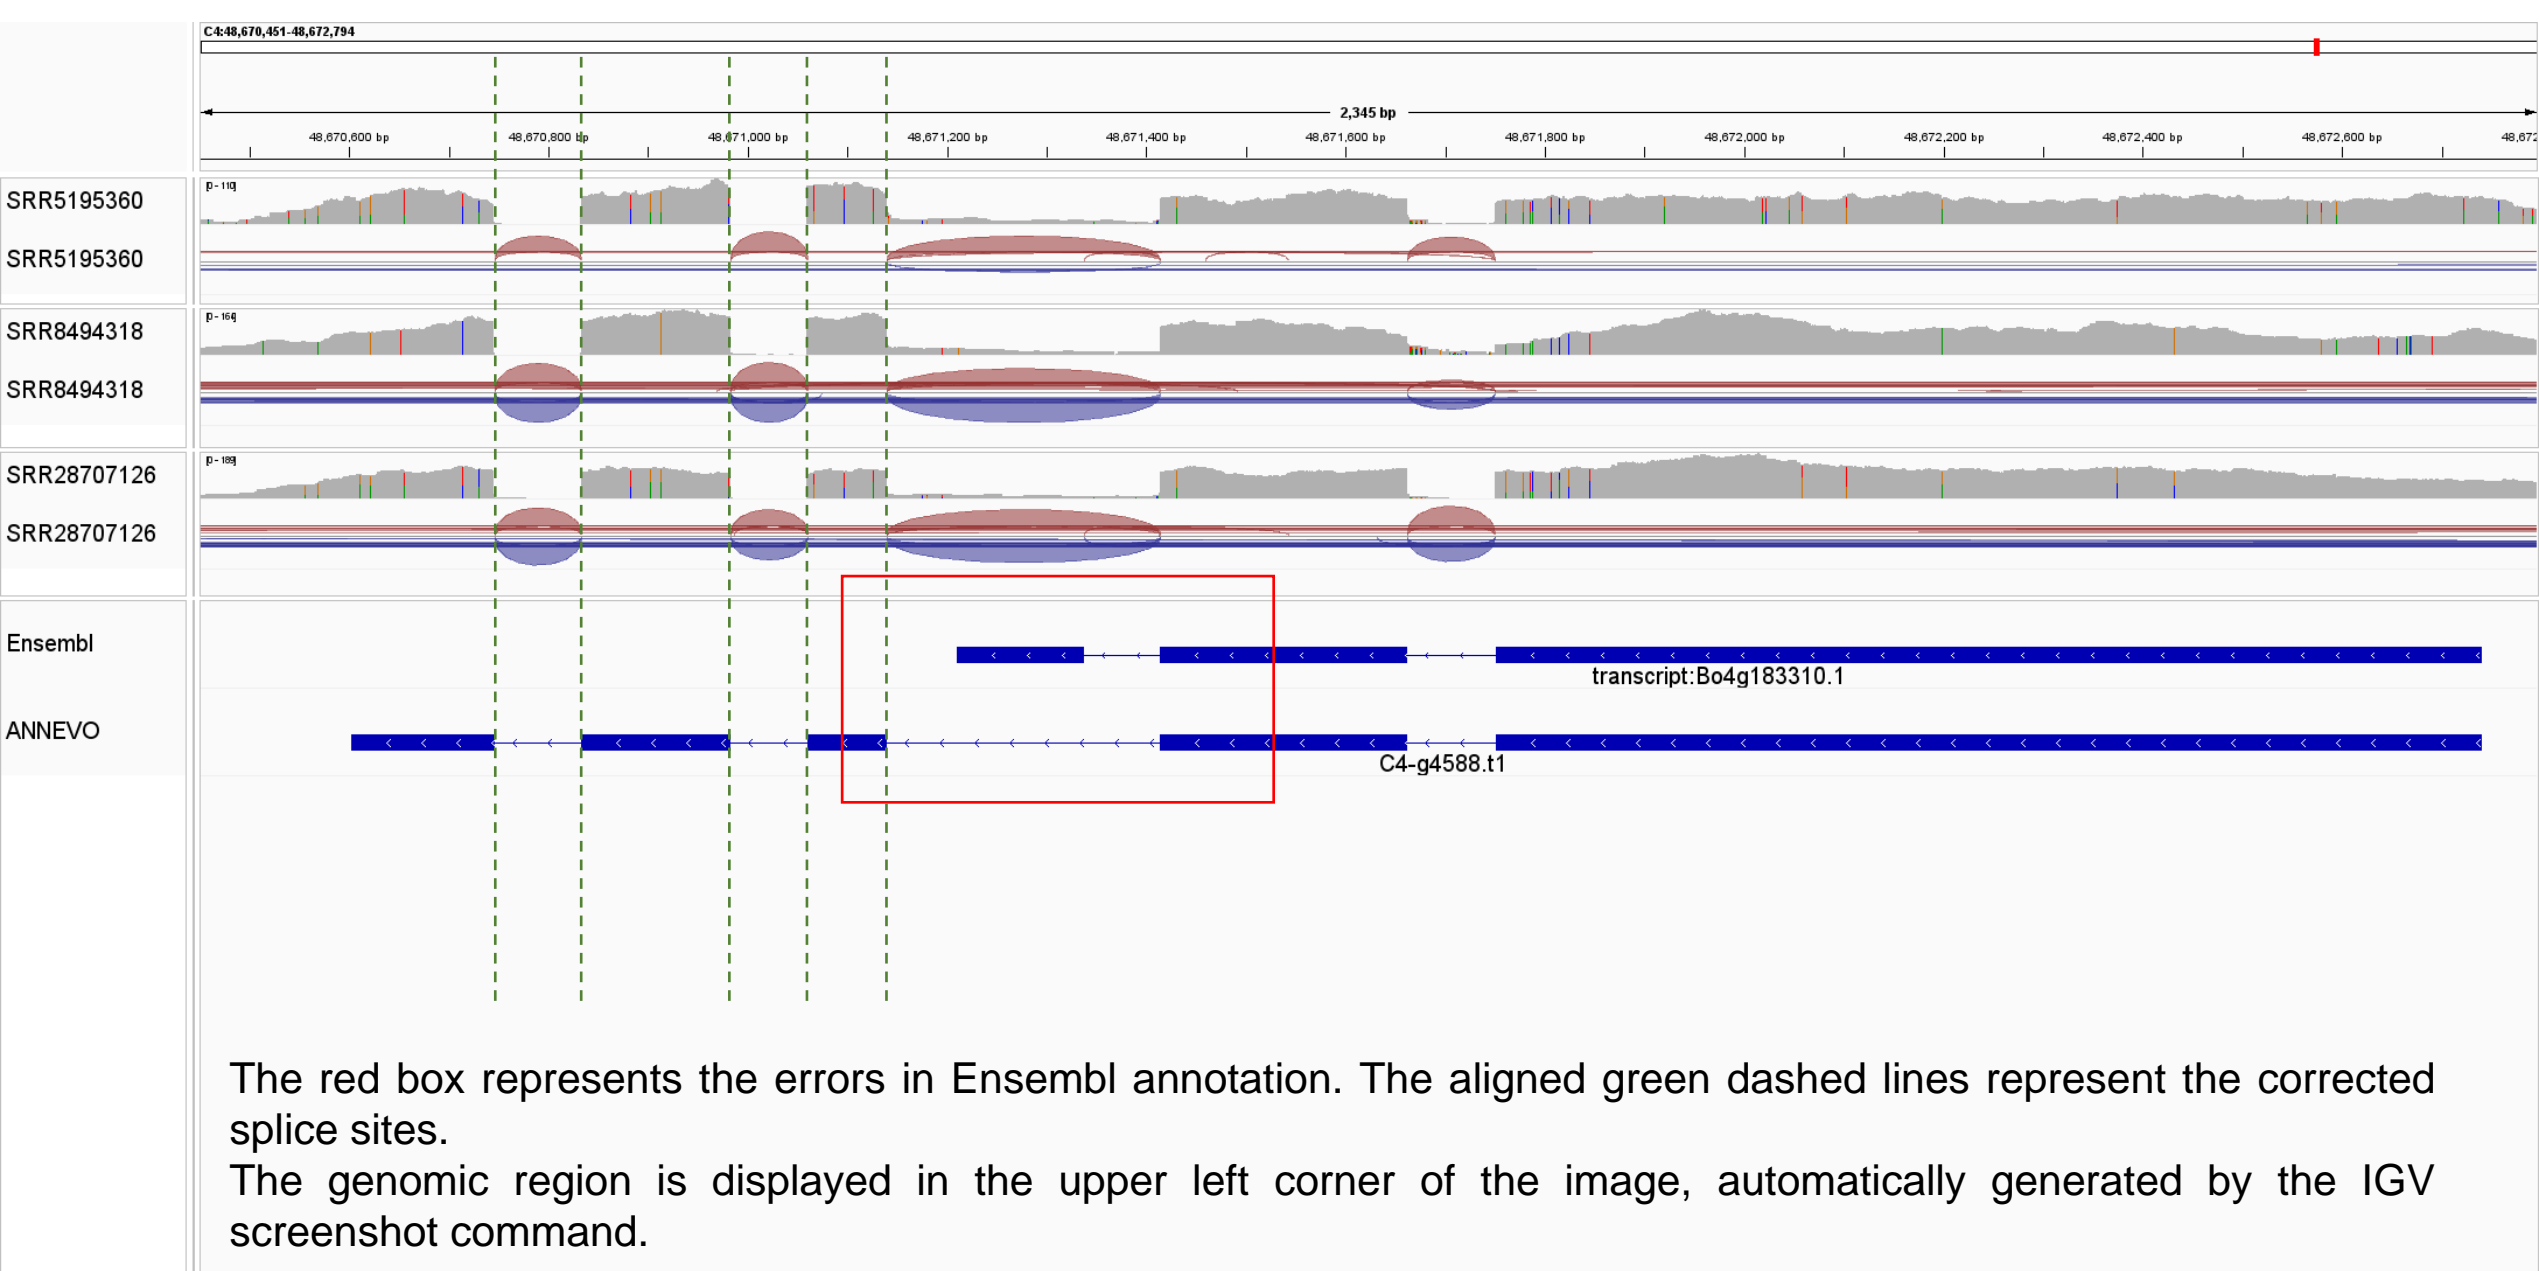

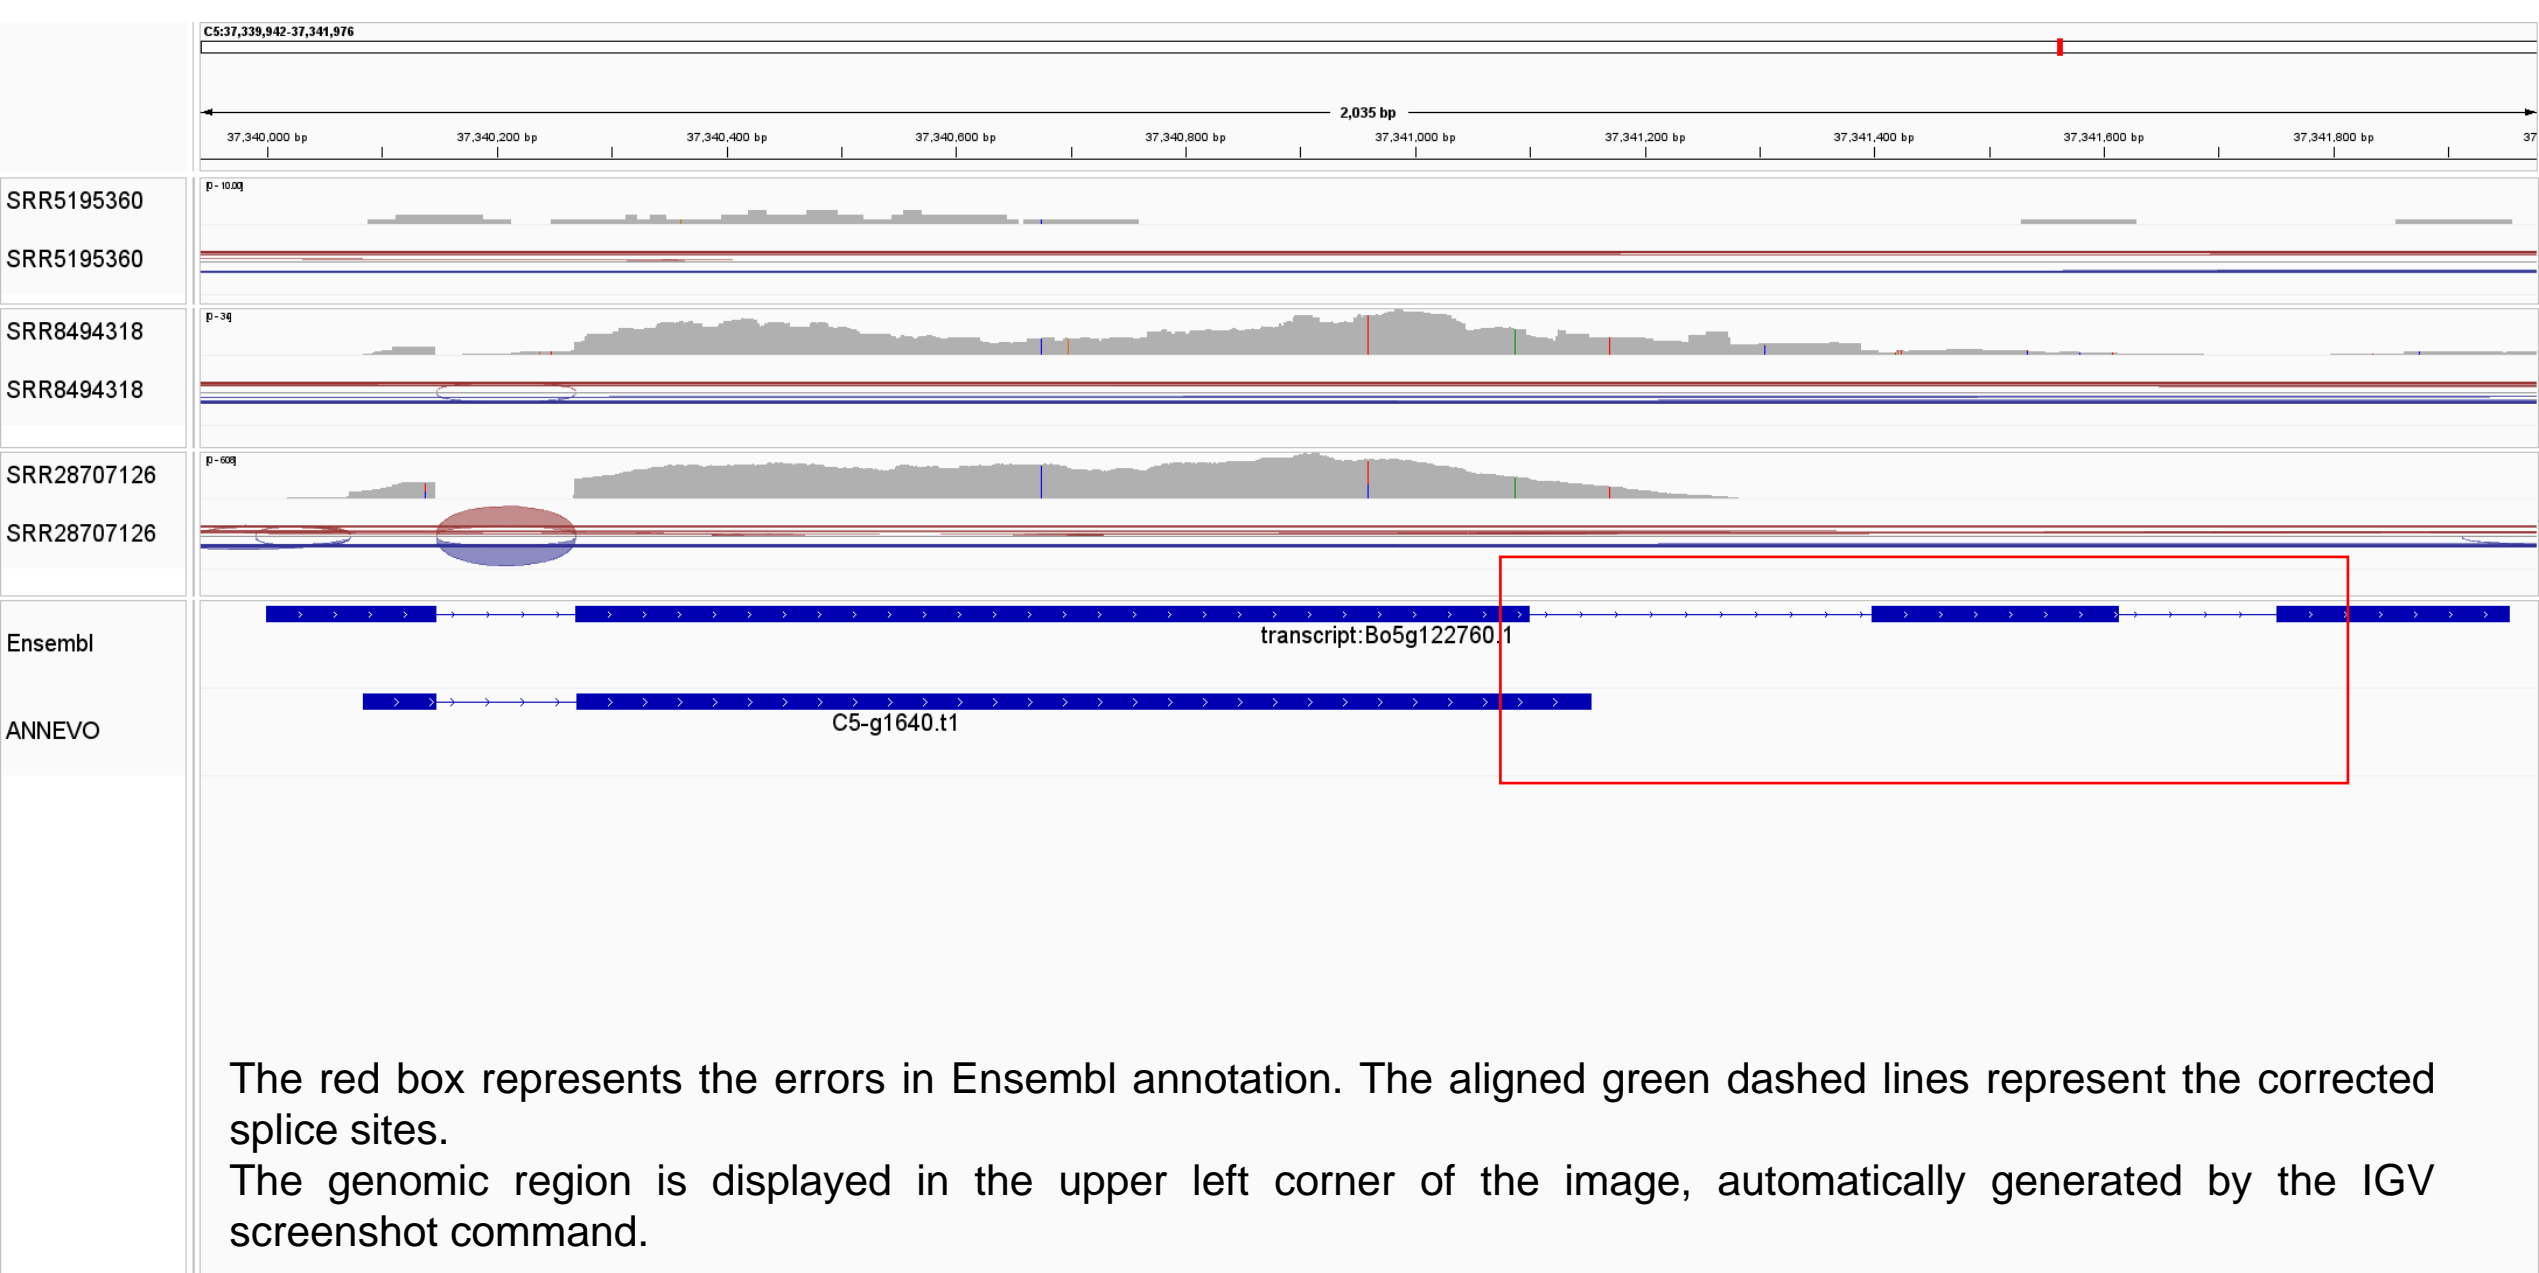

The red box represents the errors in Ensembl annotation. The aligned green dashed lines represent the corrected splice sites.

The genomic region is displayed in the upper left corner of the image, automatically generated by the IGV screenshot command.



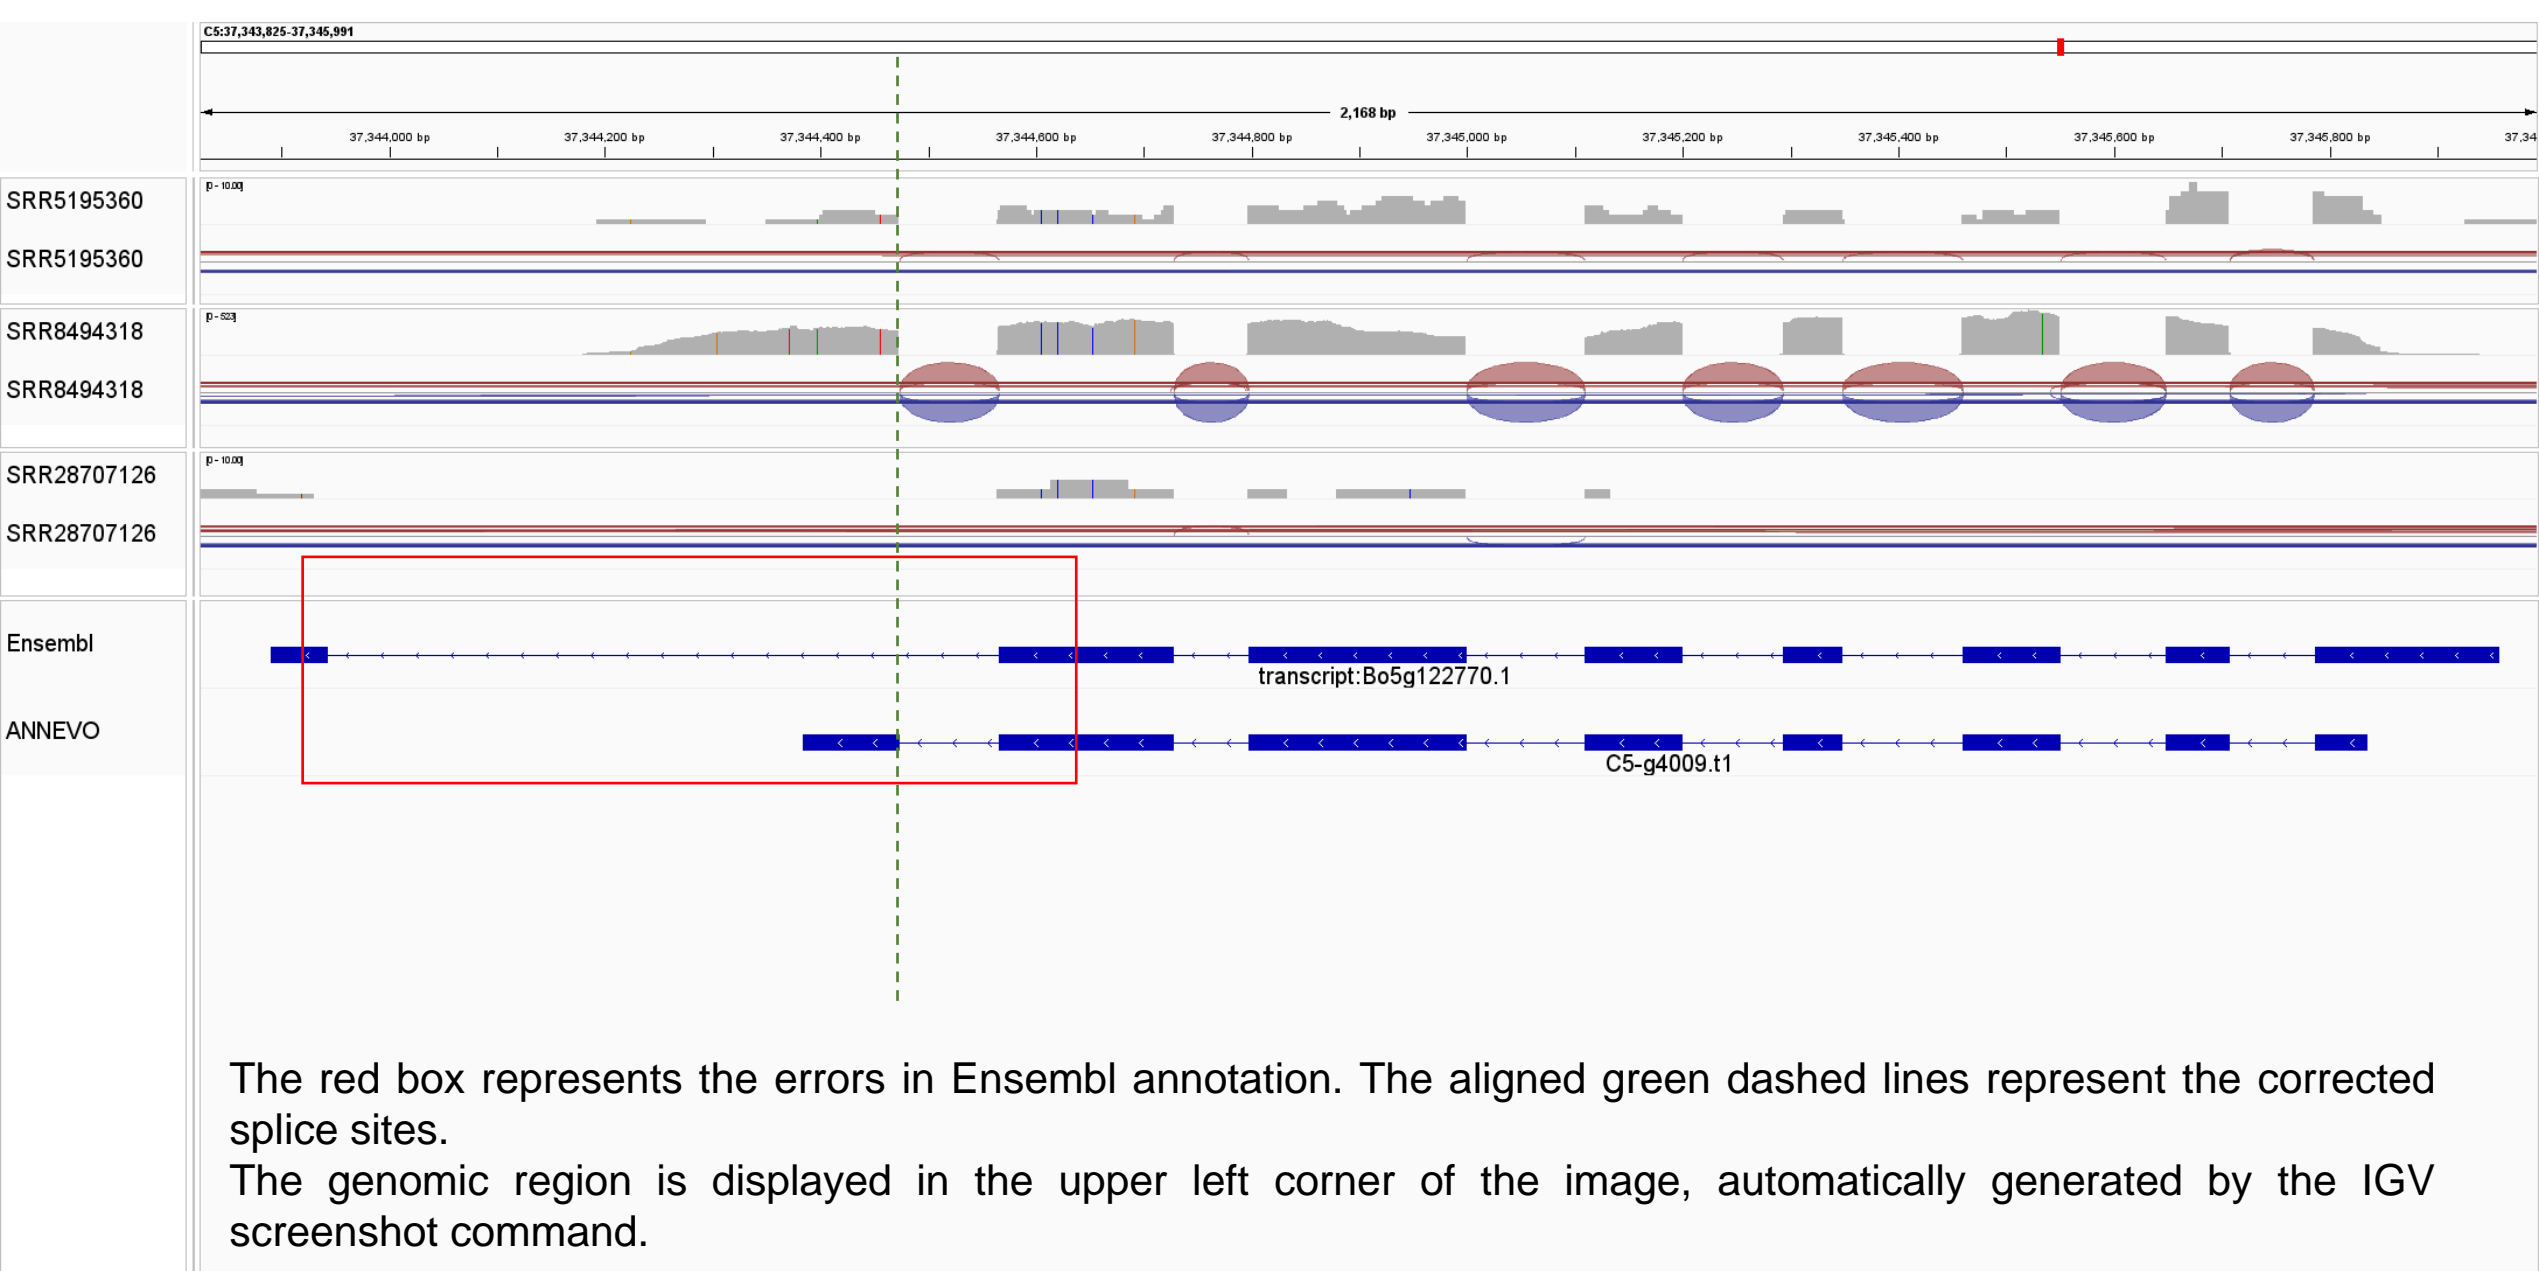

Erroneous Gene Fusion in Ensembl

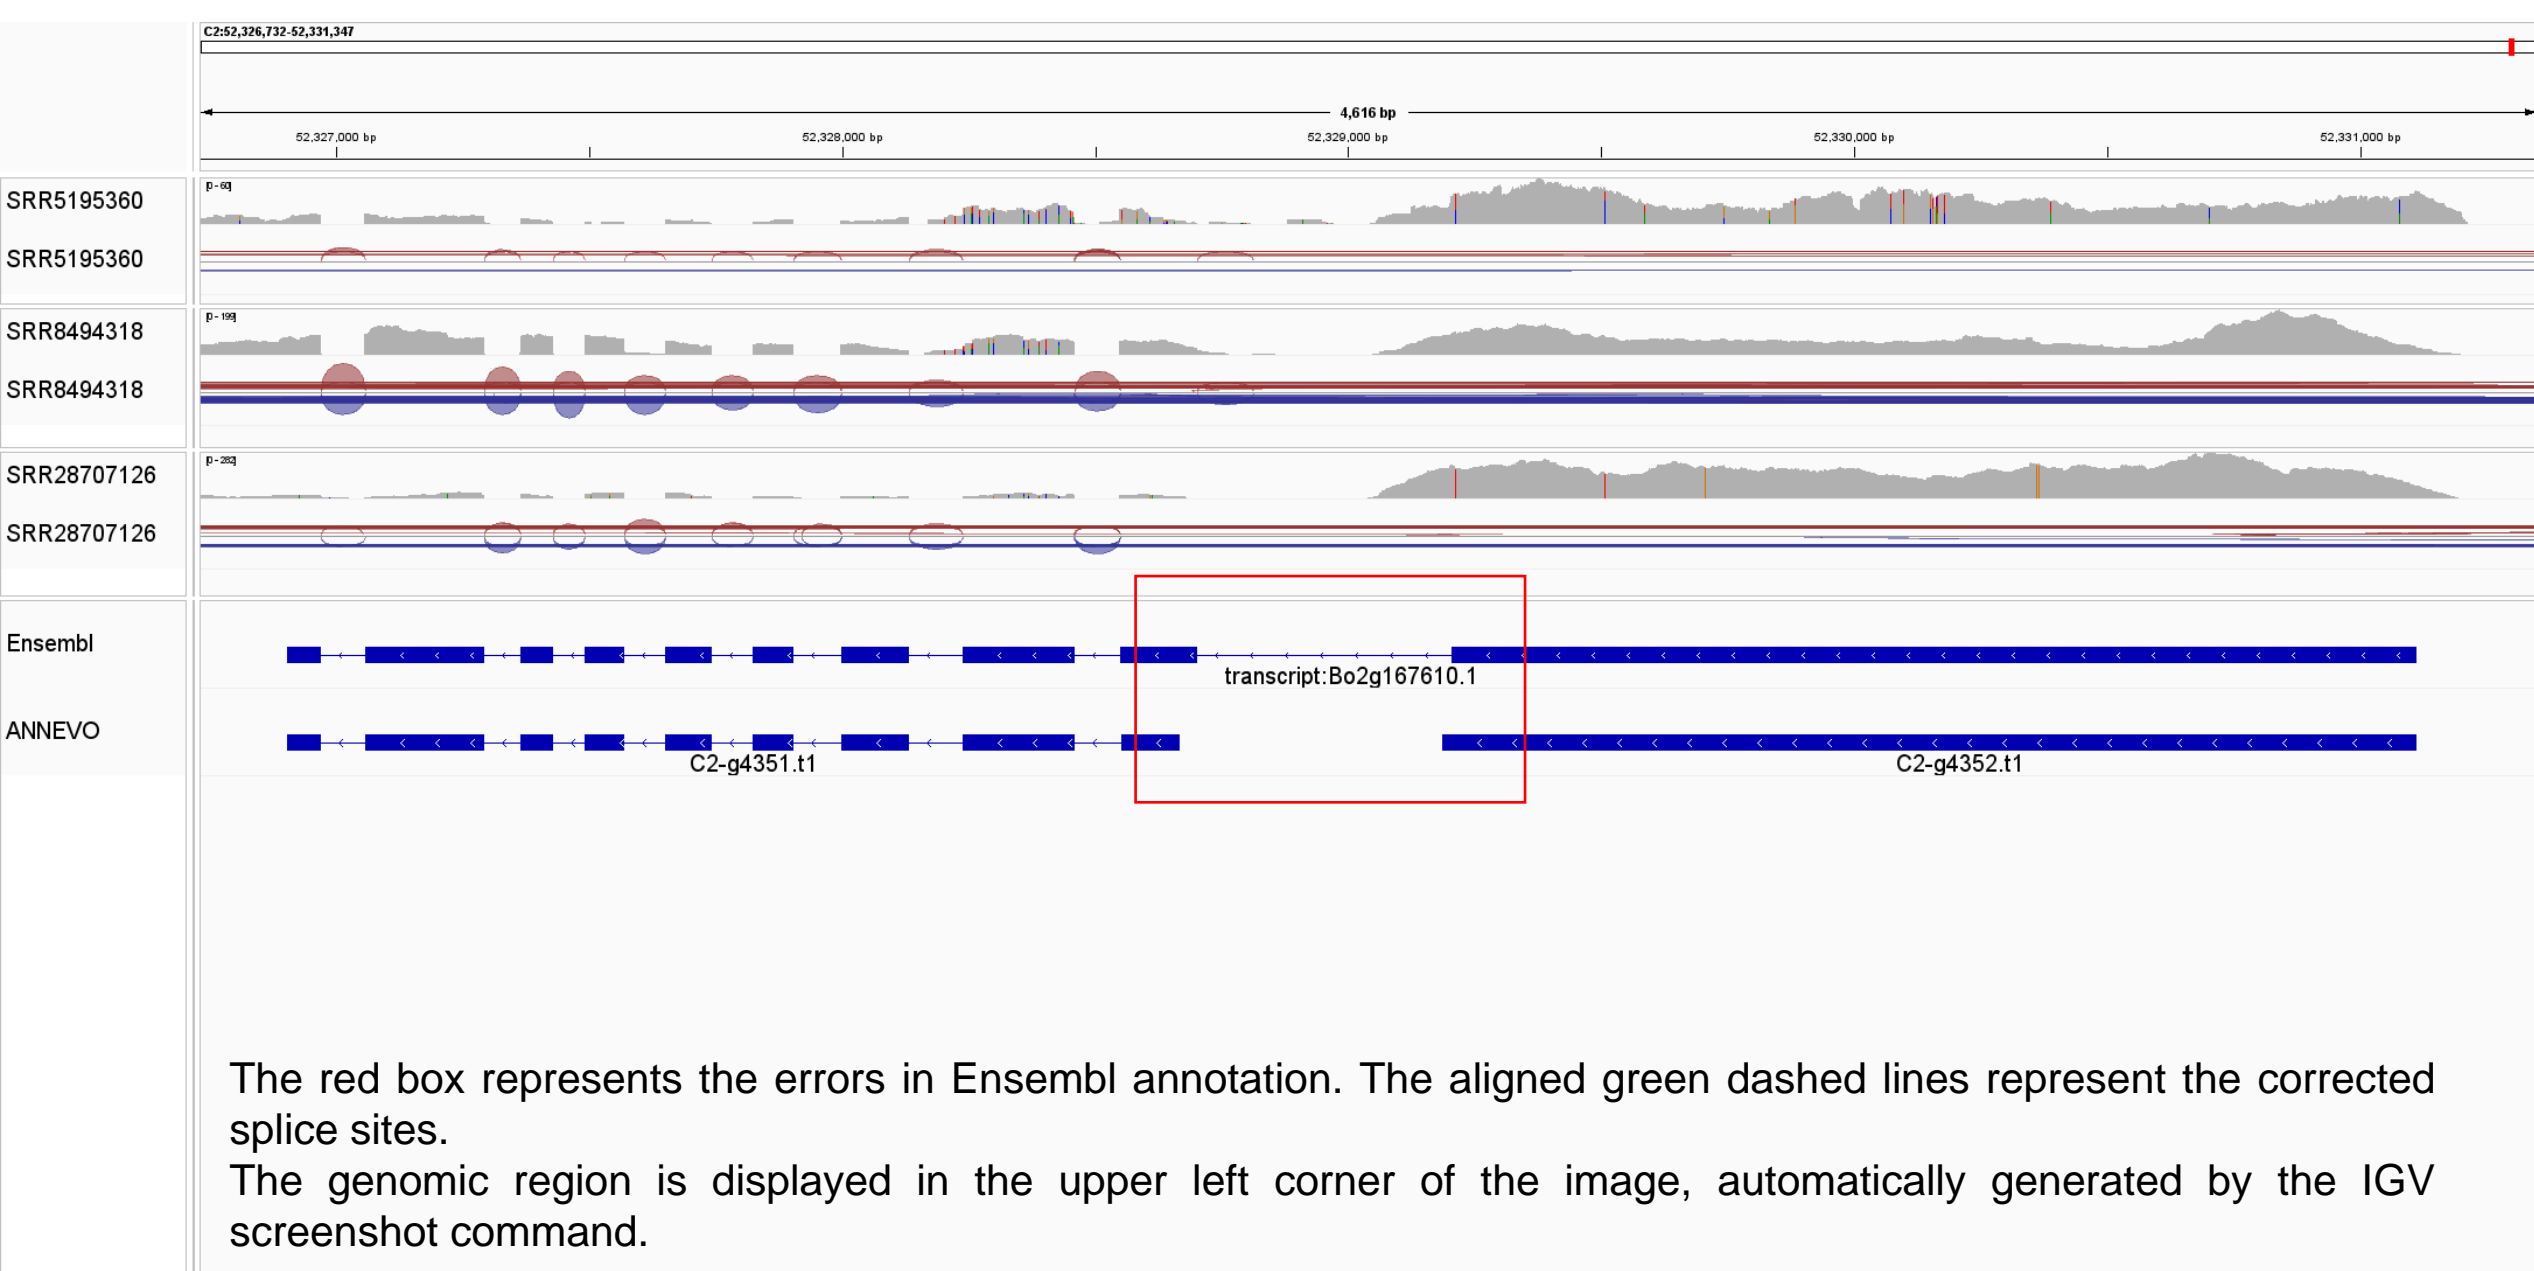

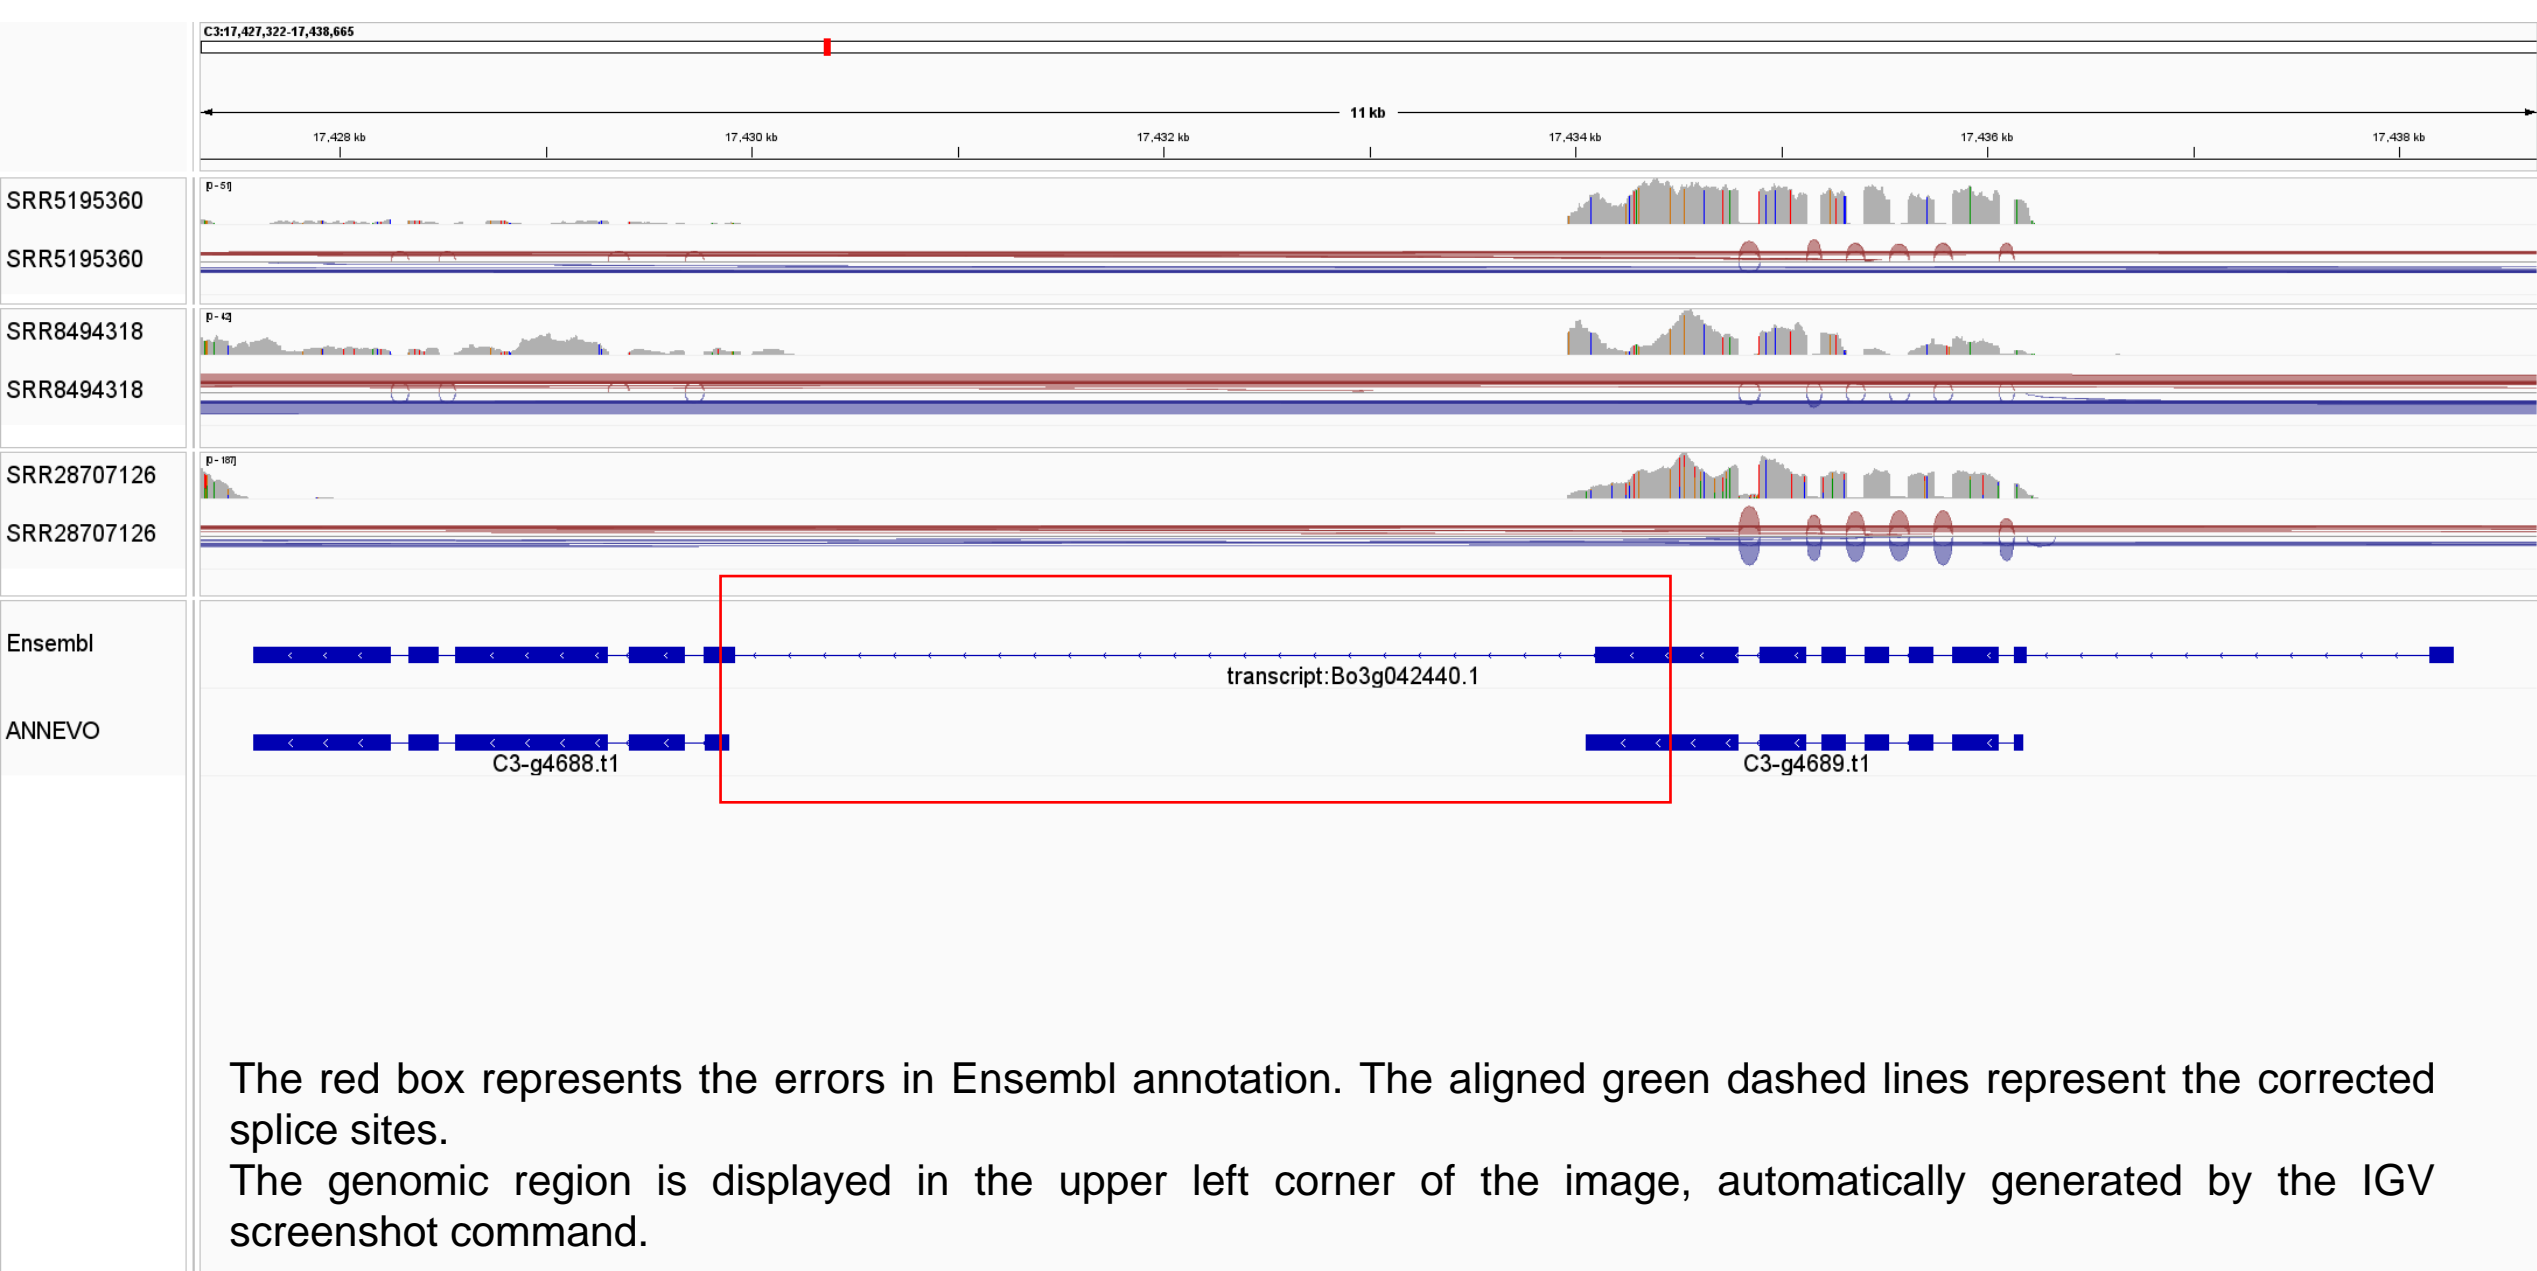

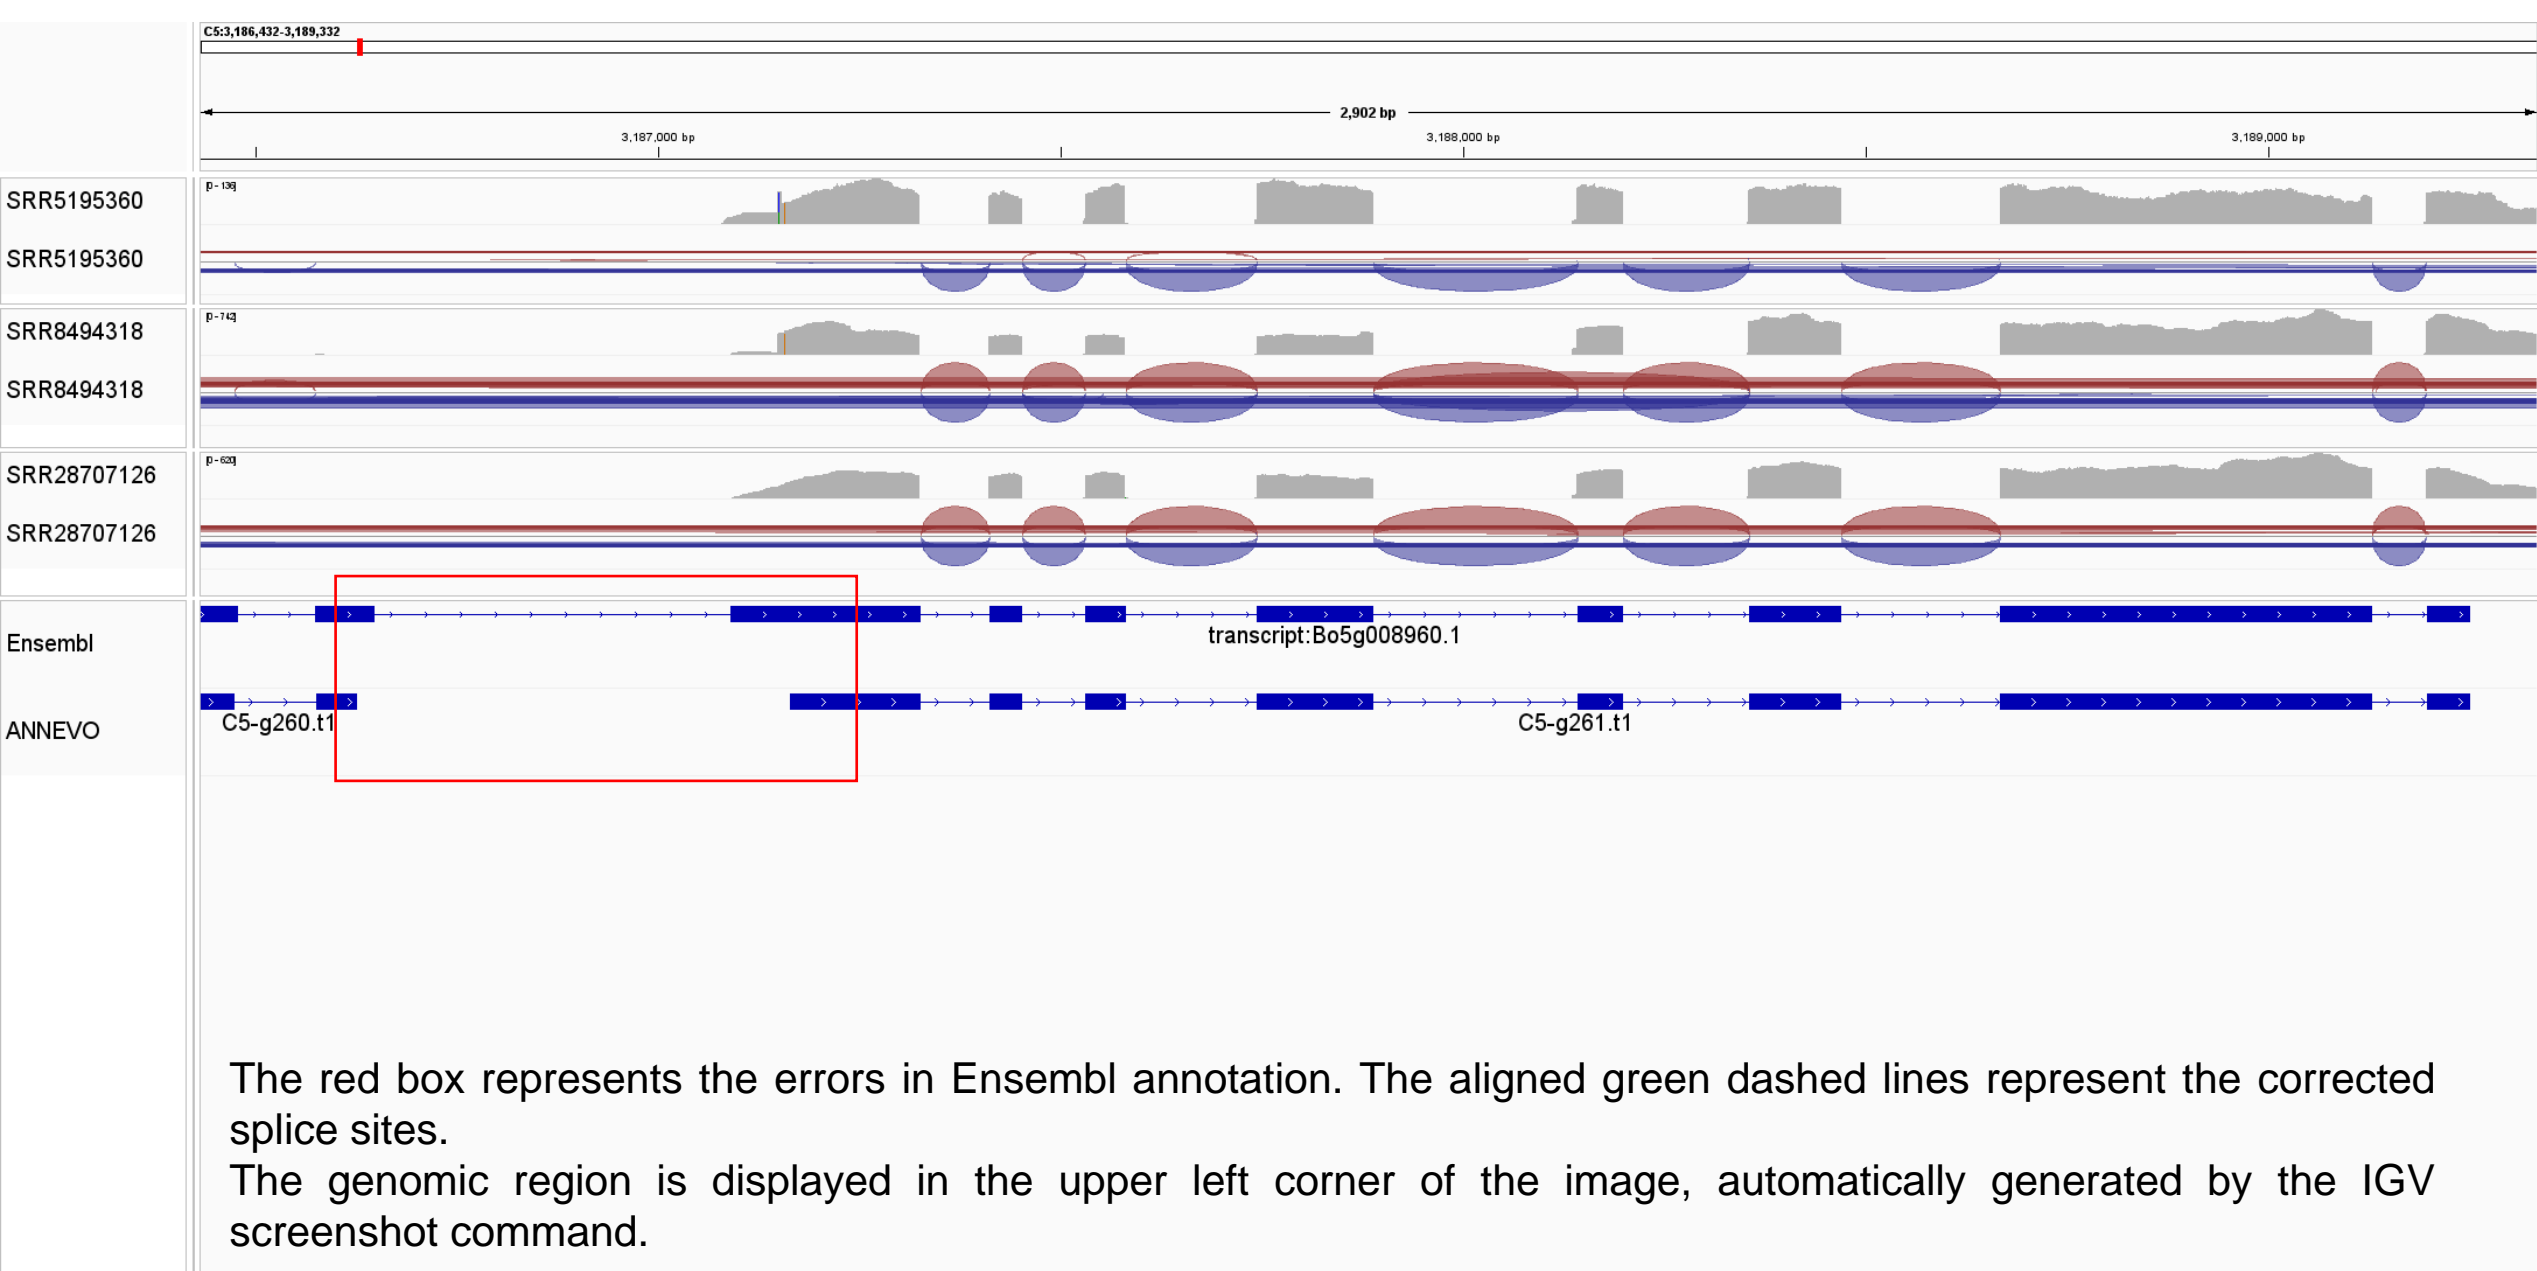

Supplement: Supplementary file 1 [file 4a5f61cc4c5309025792a5d6.pdf]
