# Supplementary material for: Highly accurate ab initio gene annotation with ANNEVO
Source: Research Square preprint supplement (doi:10.21203/rs.3.rs-6402260/v1), 2025-04-24

Additional BUSCO Genes Predicted by ANNEVO and Fully  
Supported by RNA-Seq

Missing BUSCO Gene in Ensembl

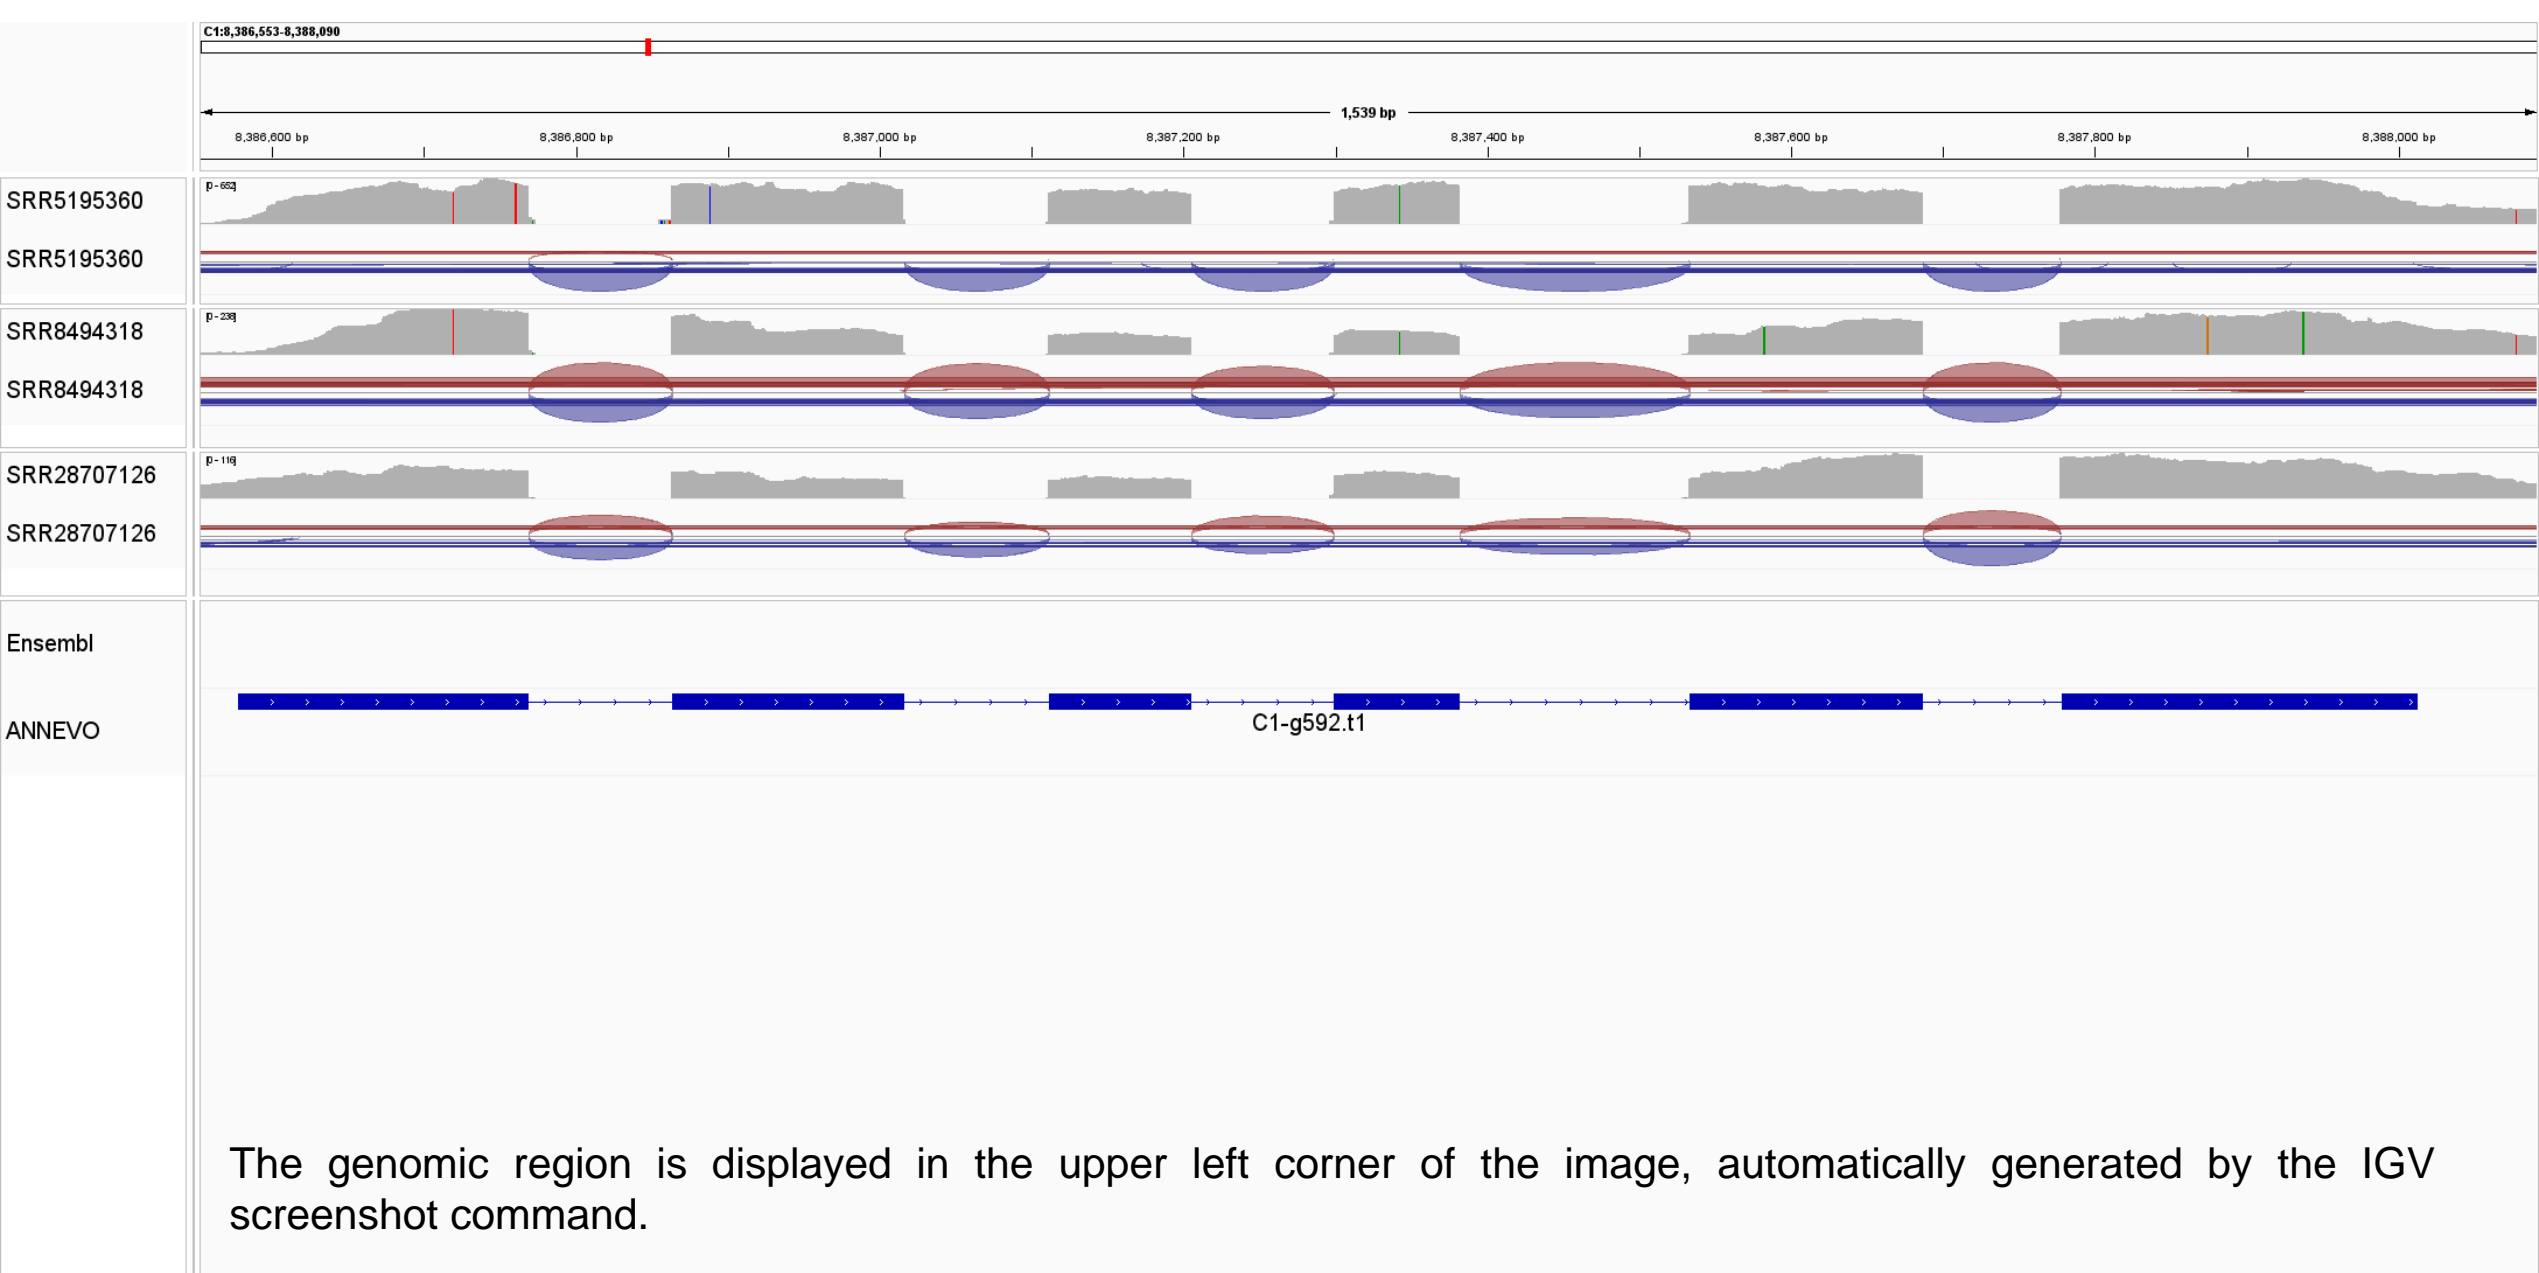

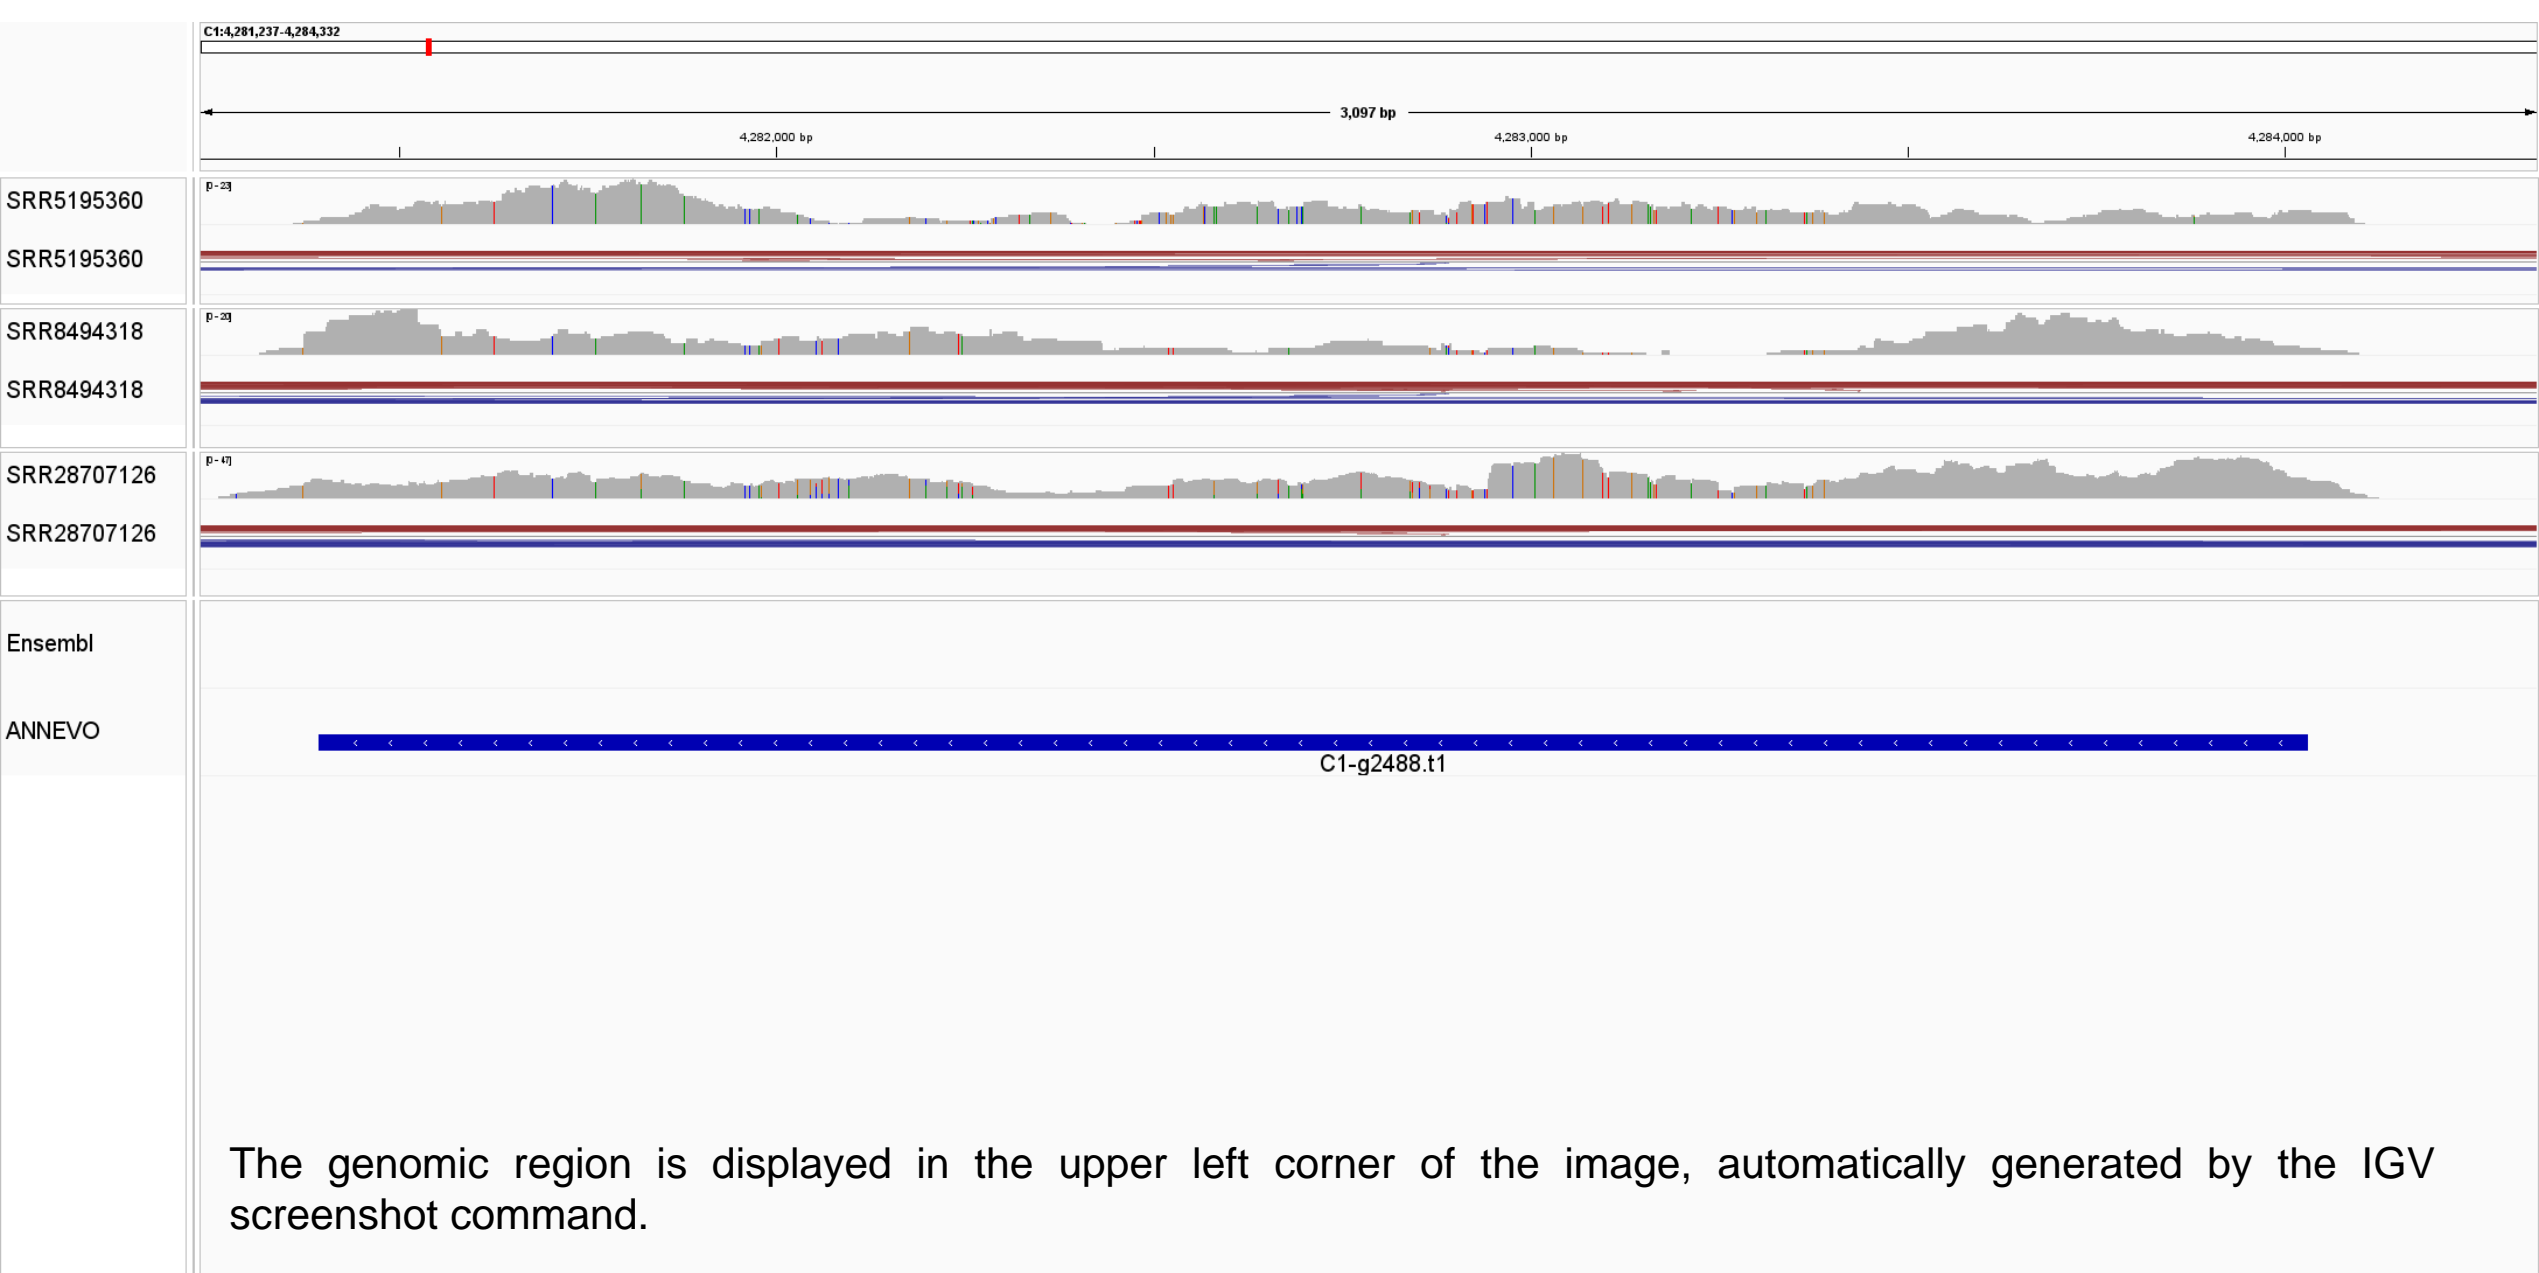

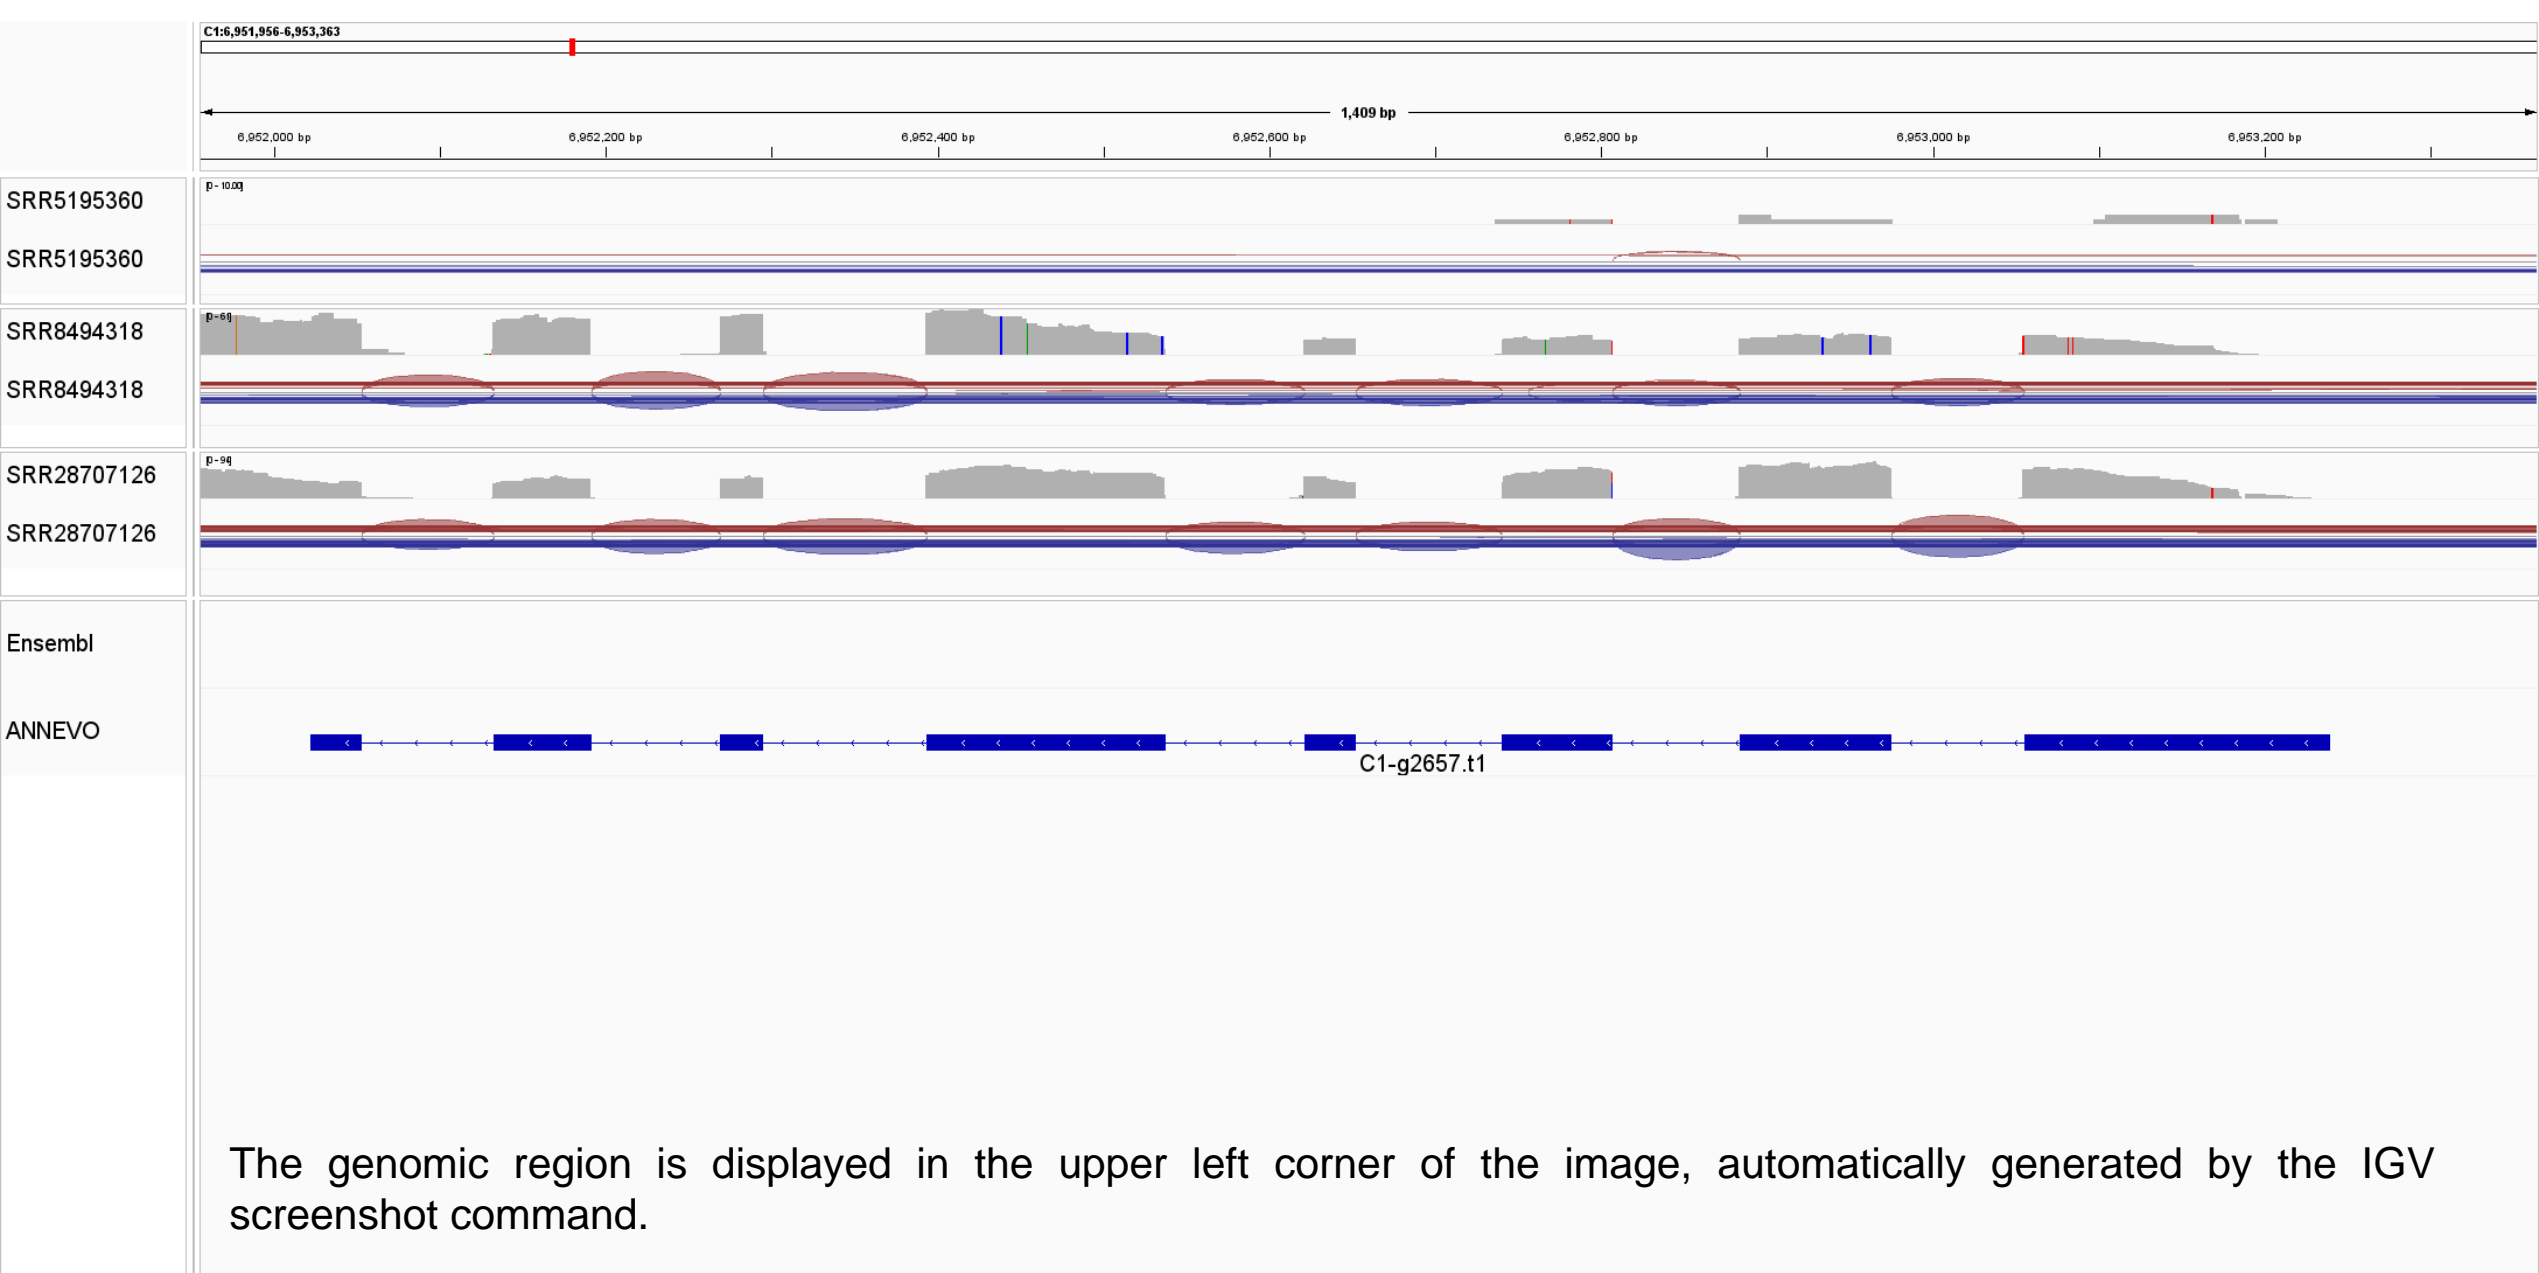

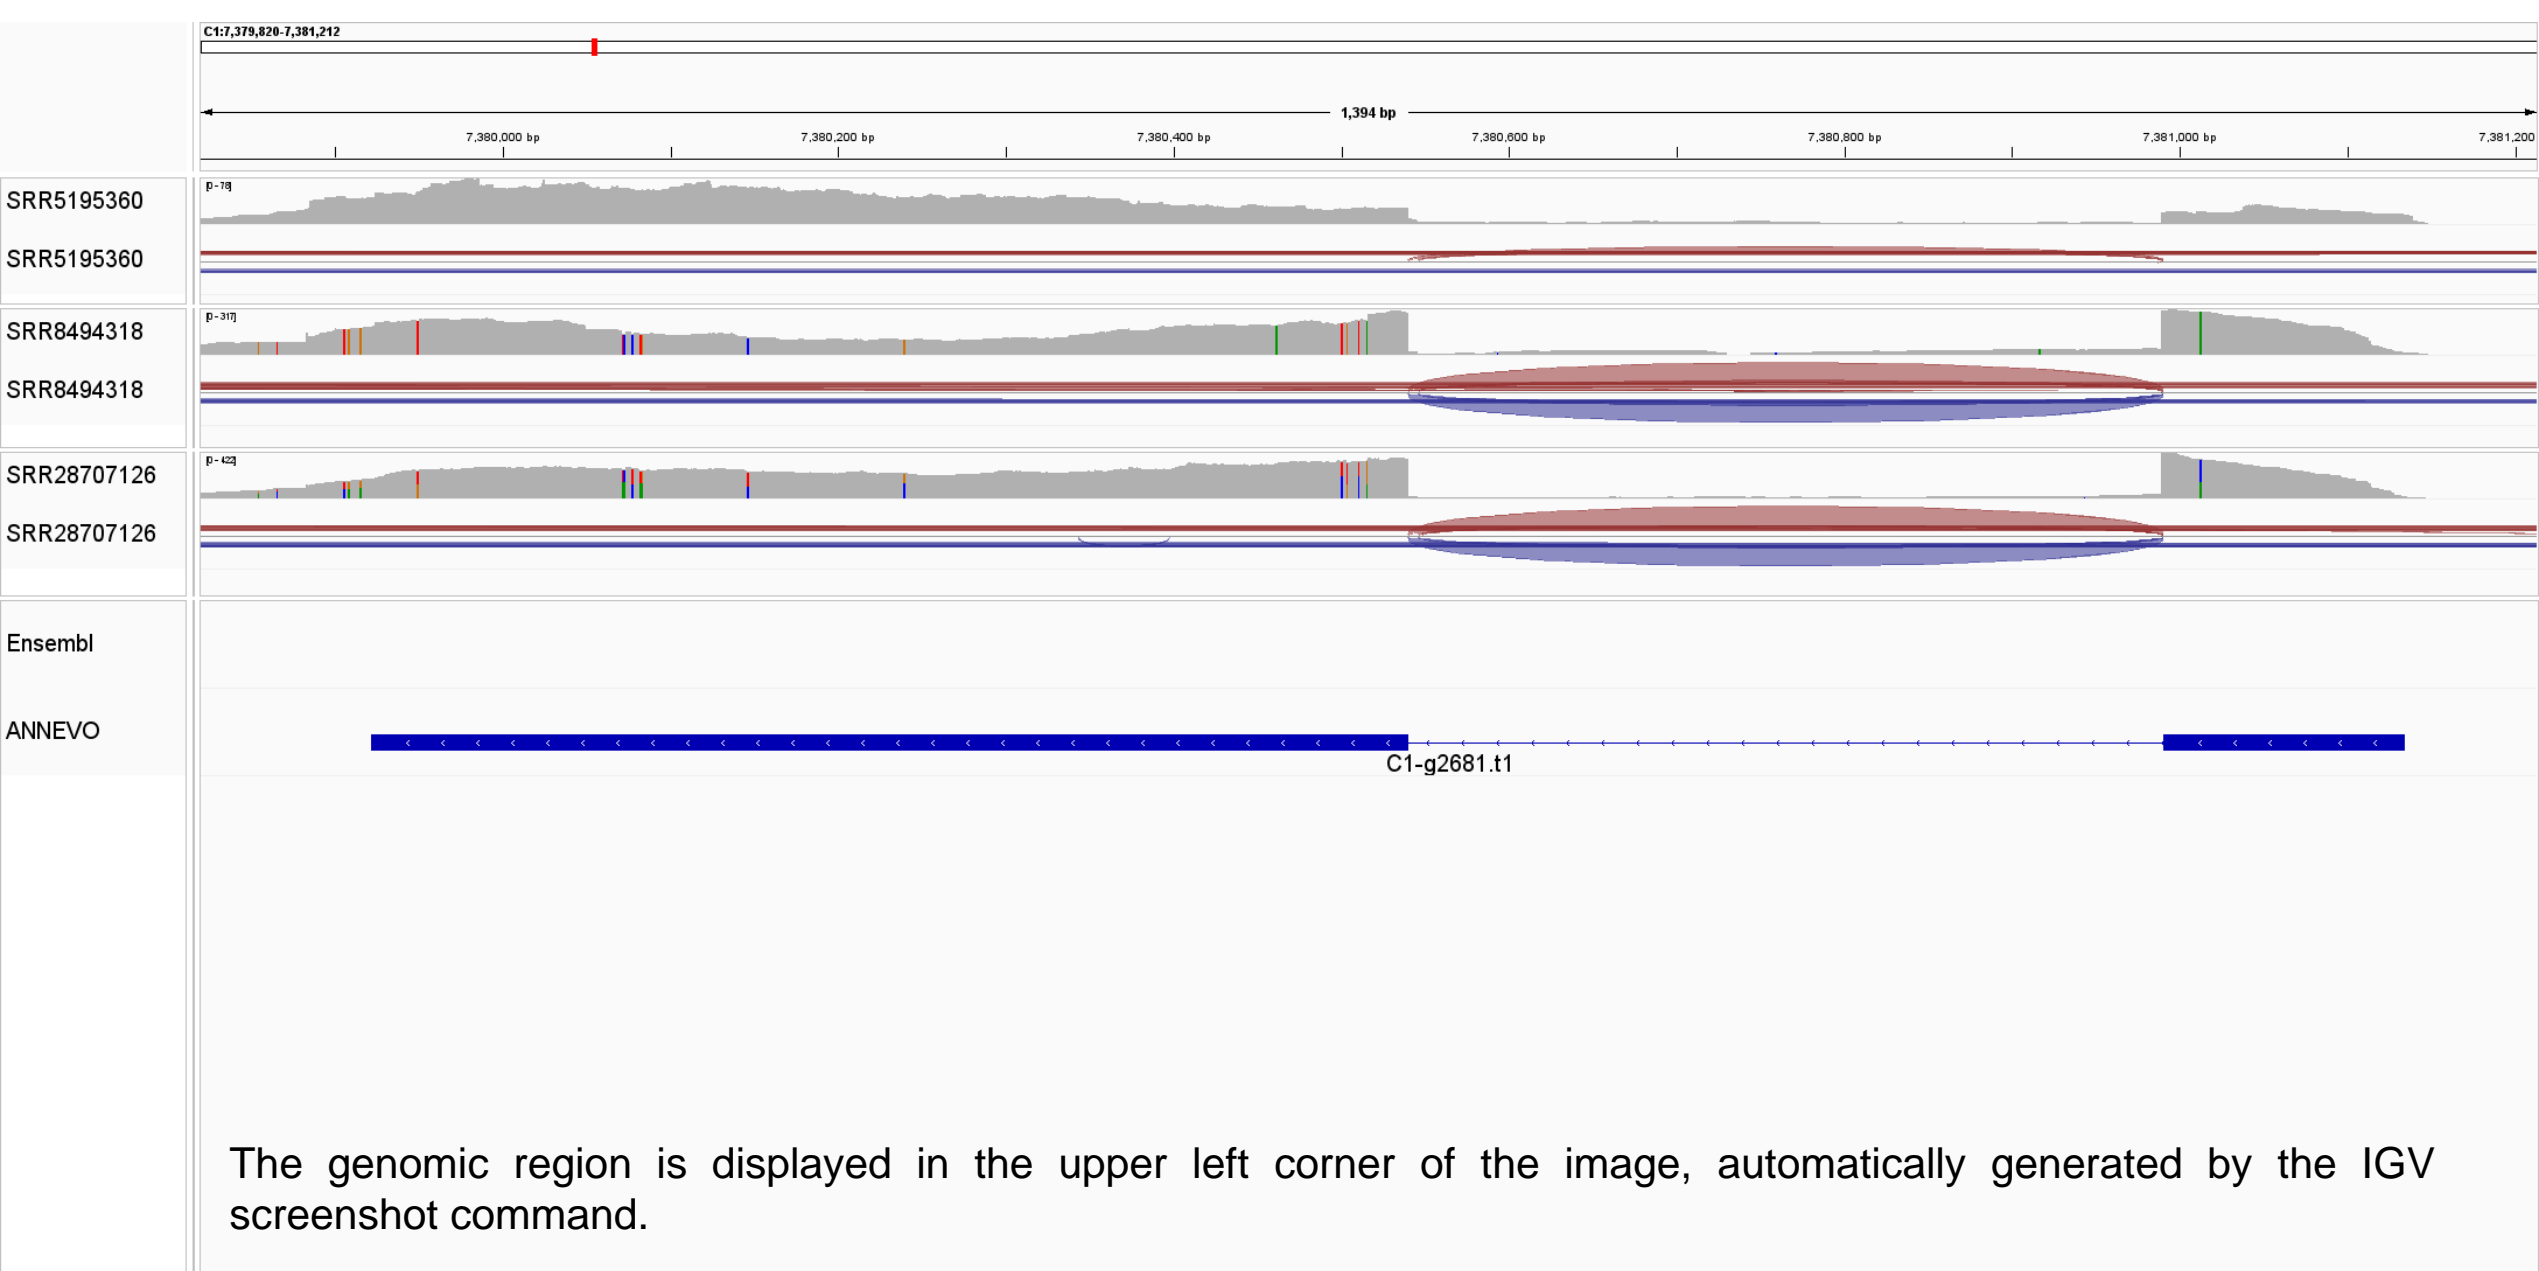

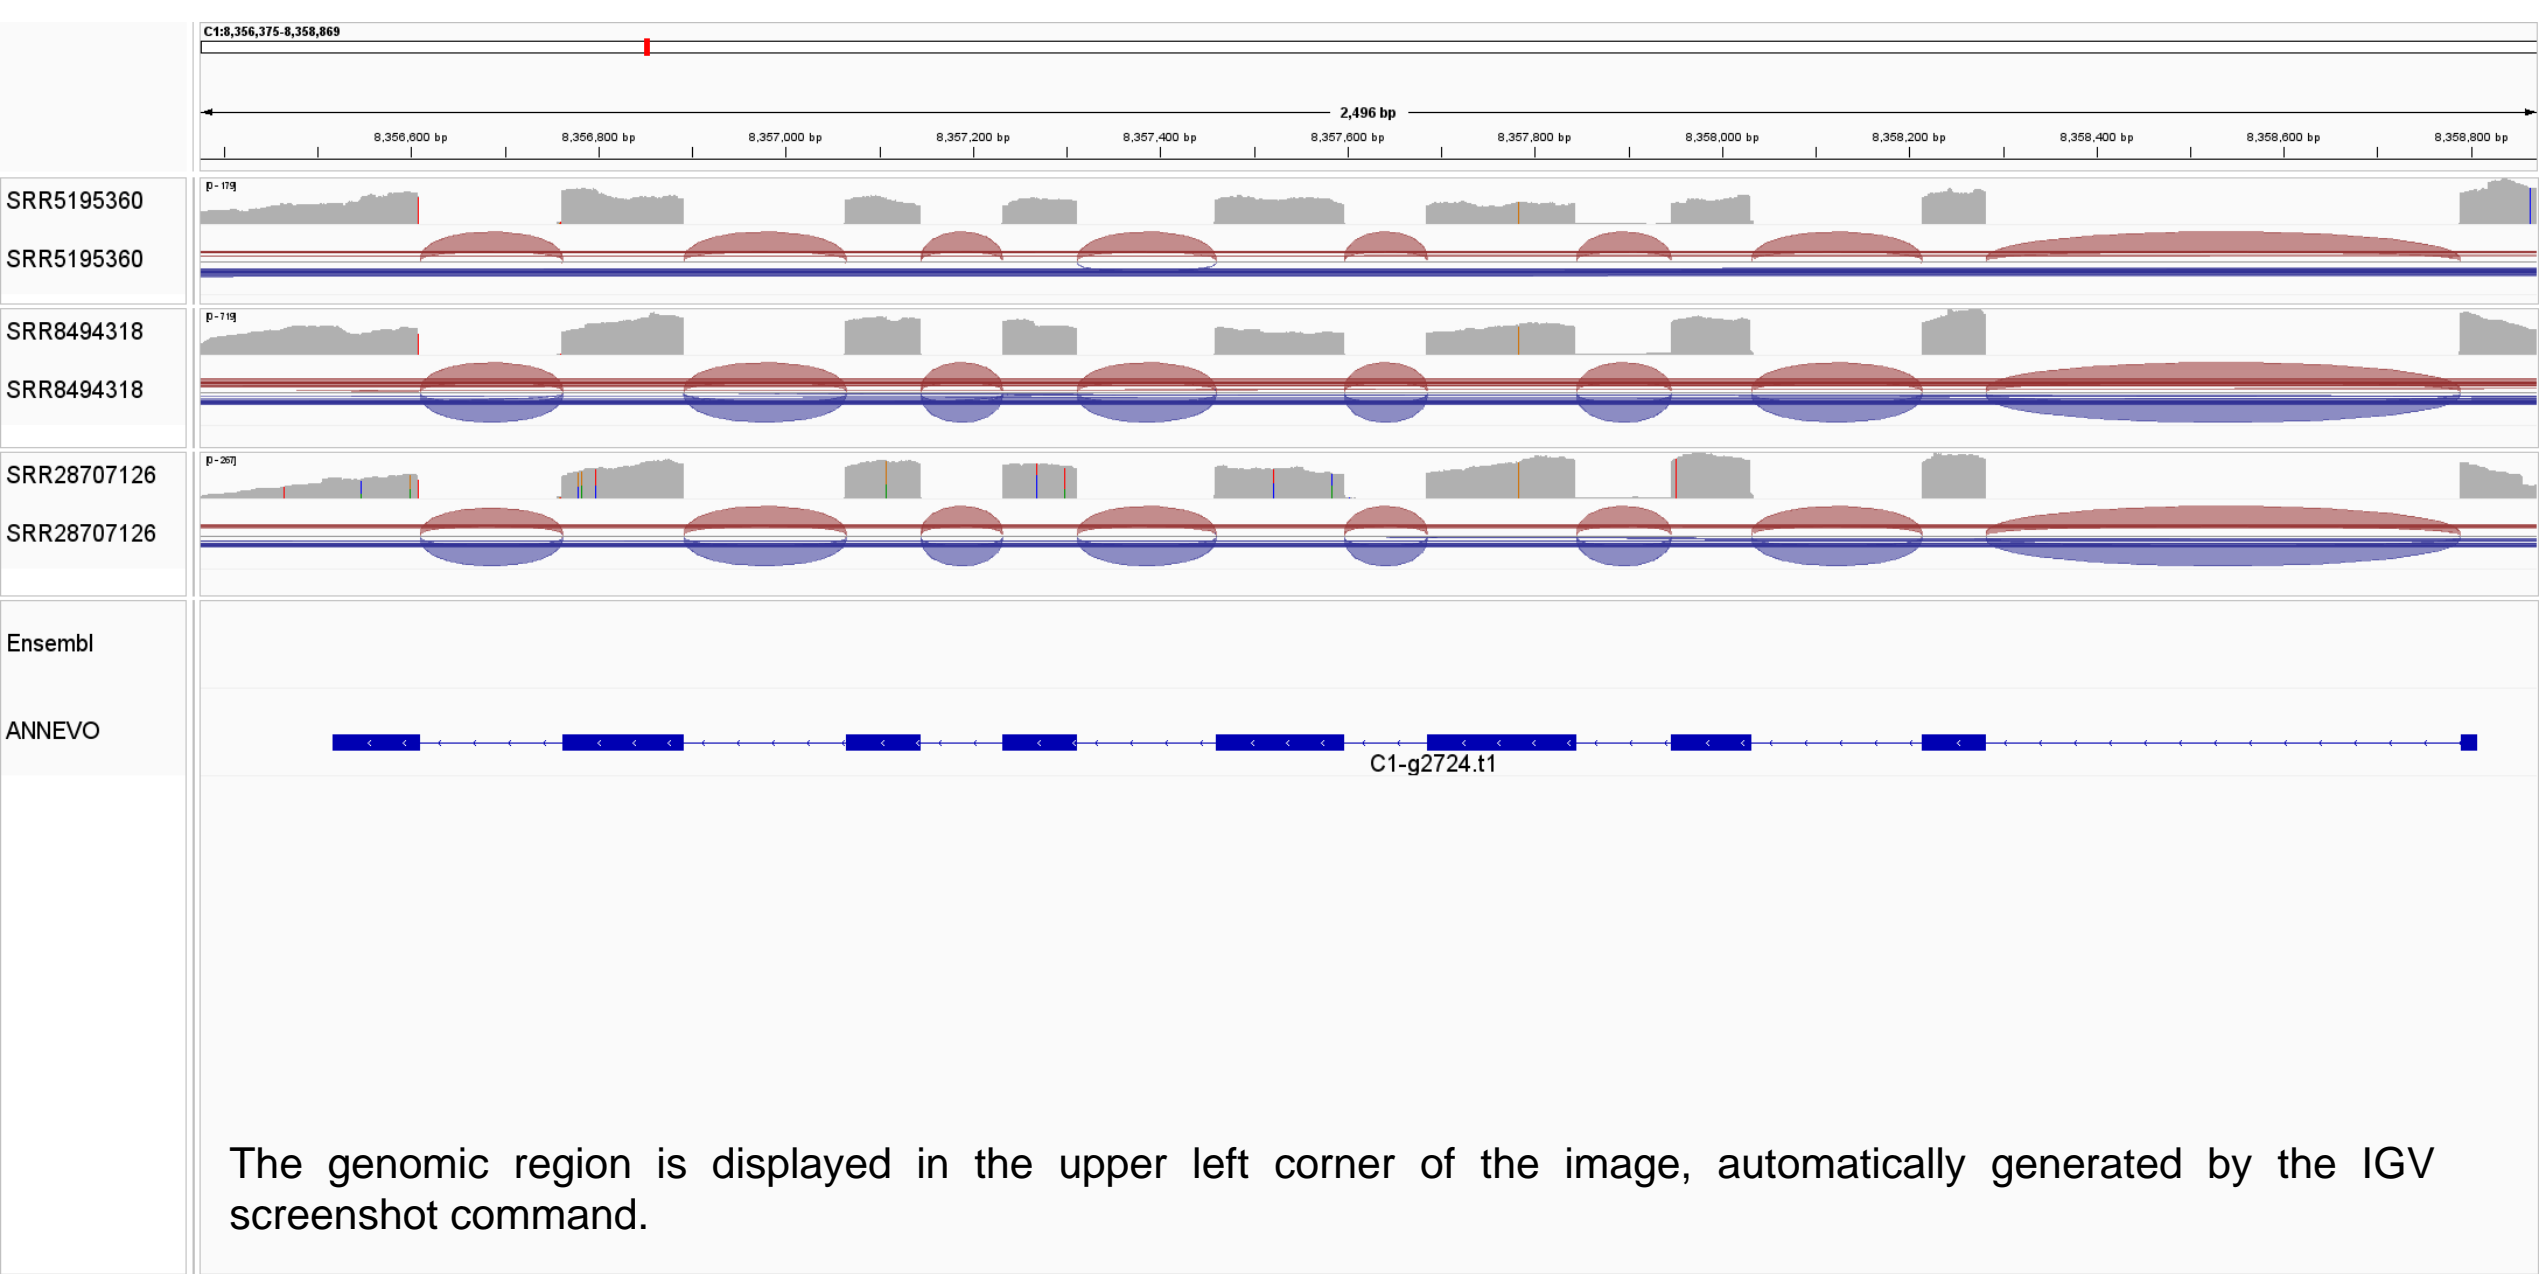

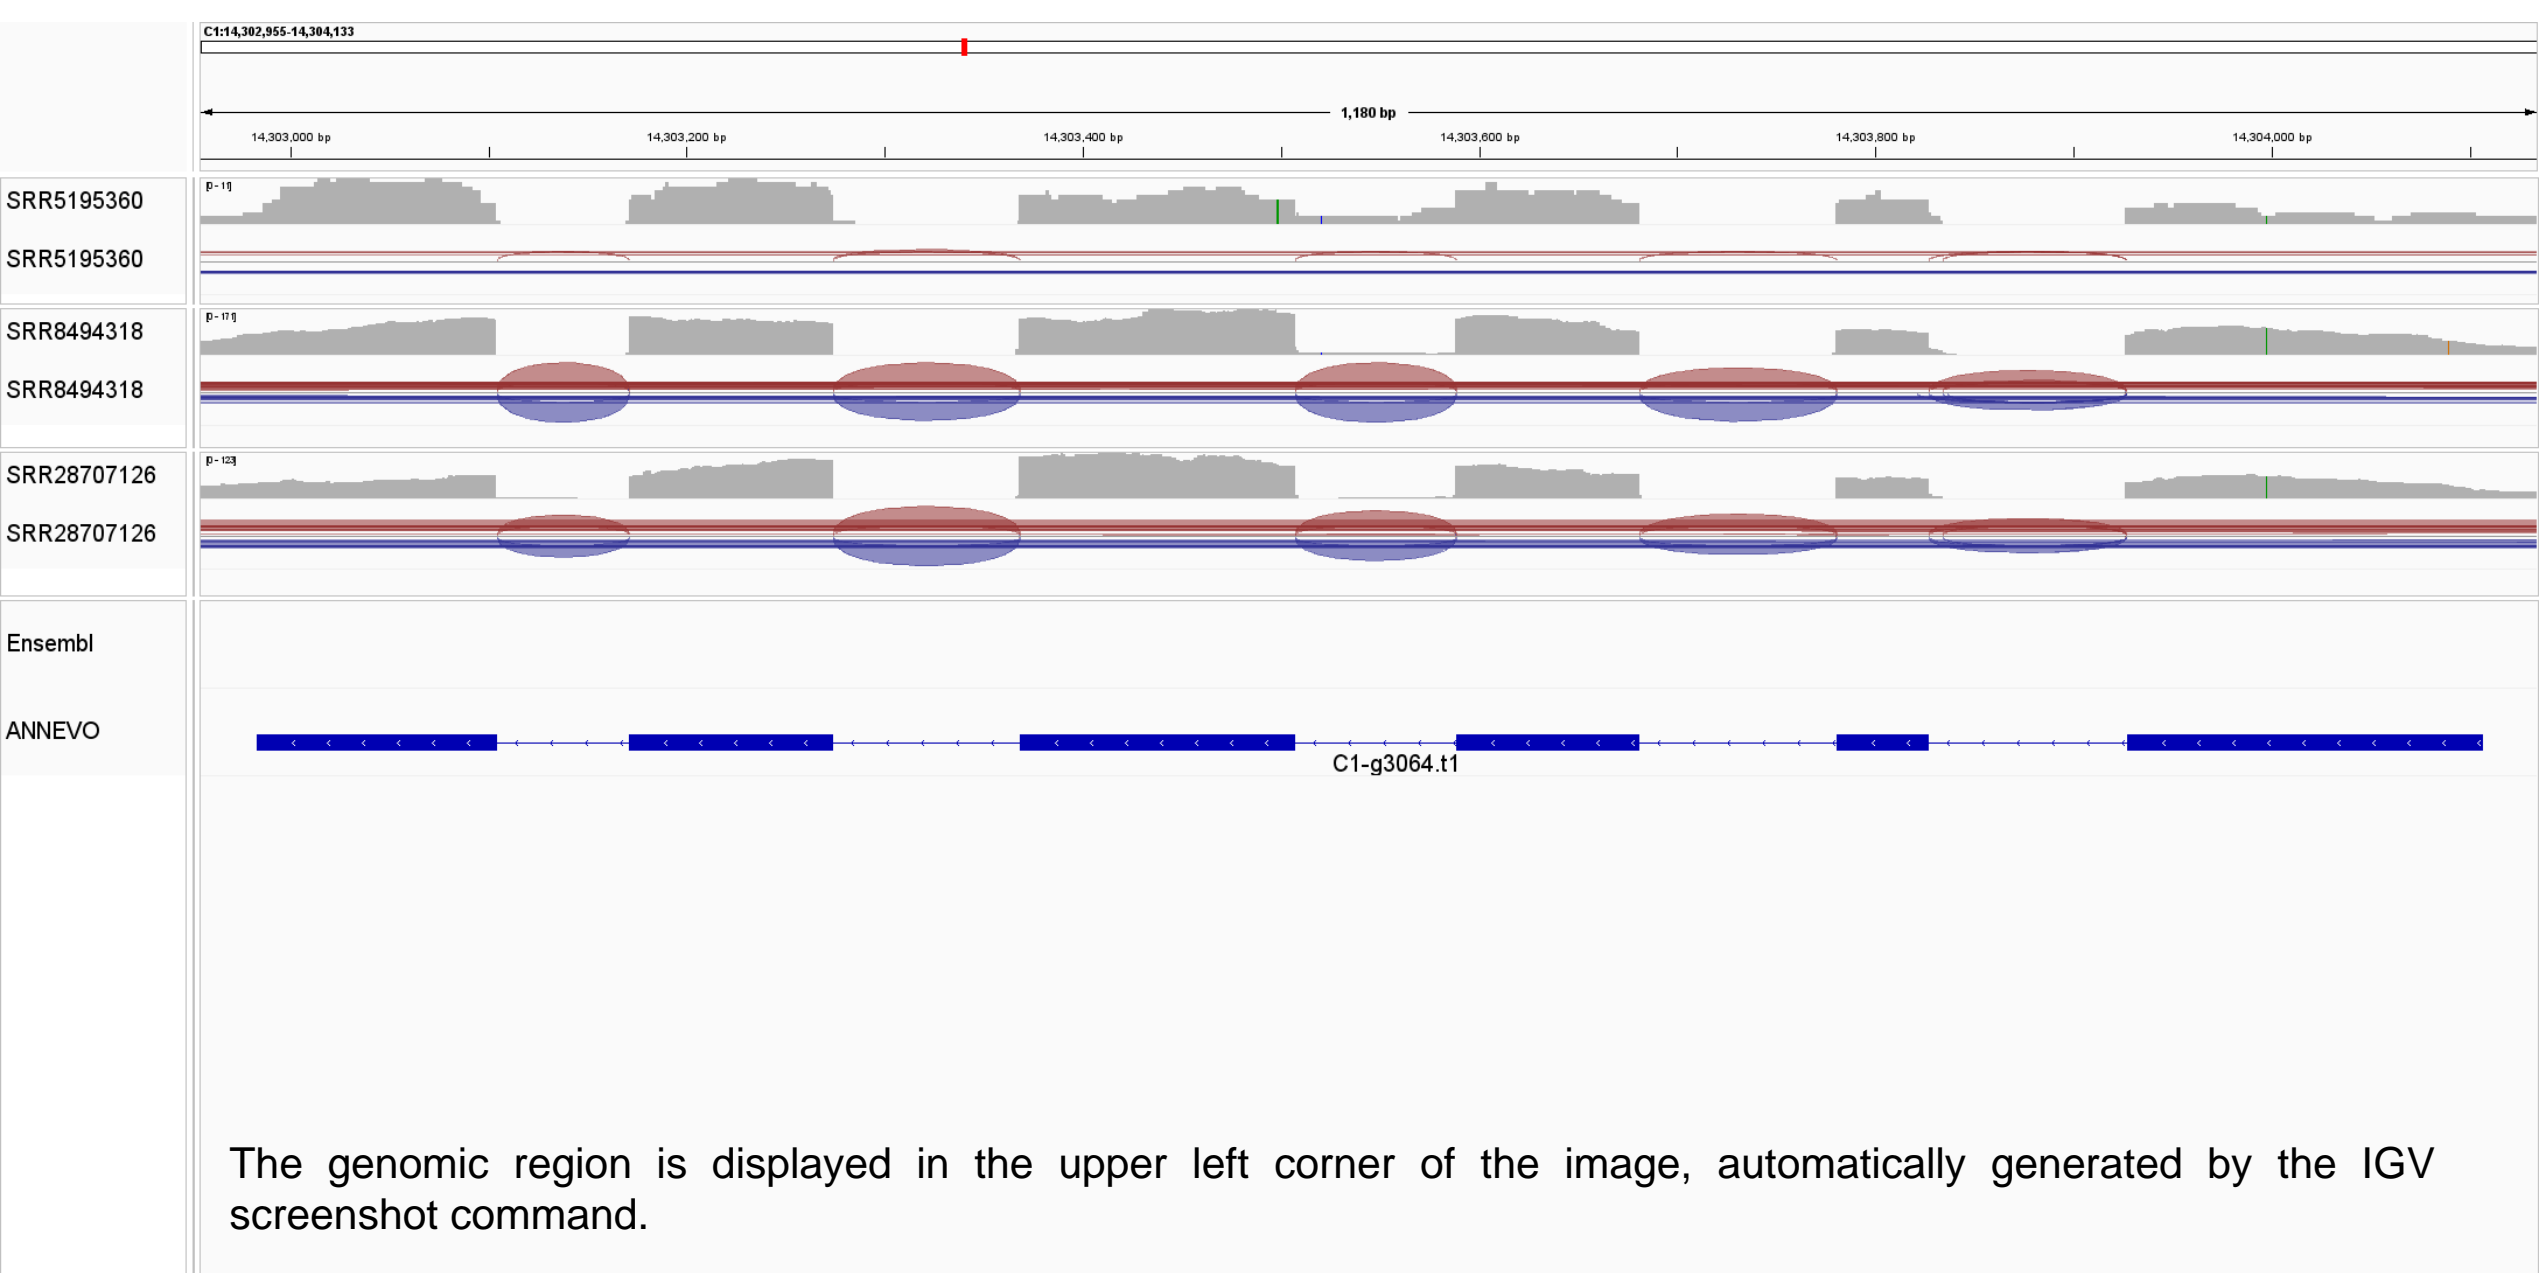



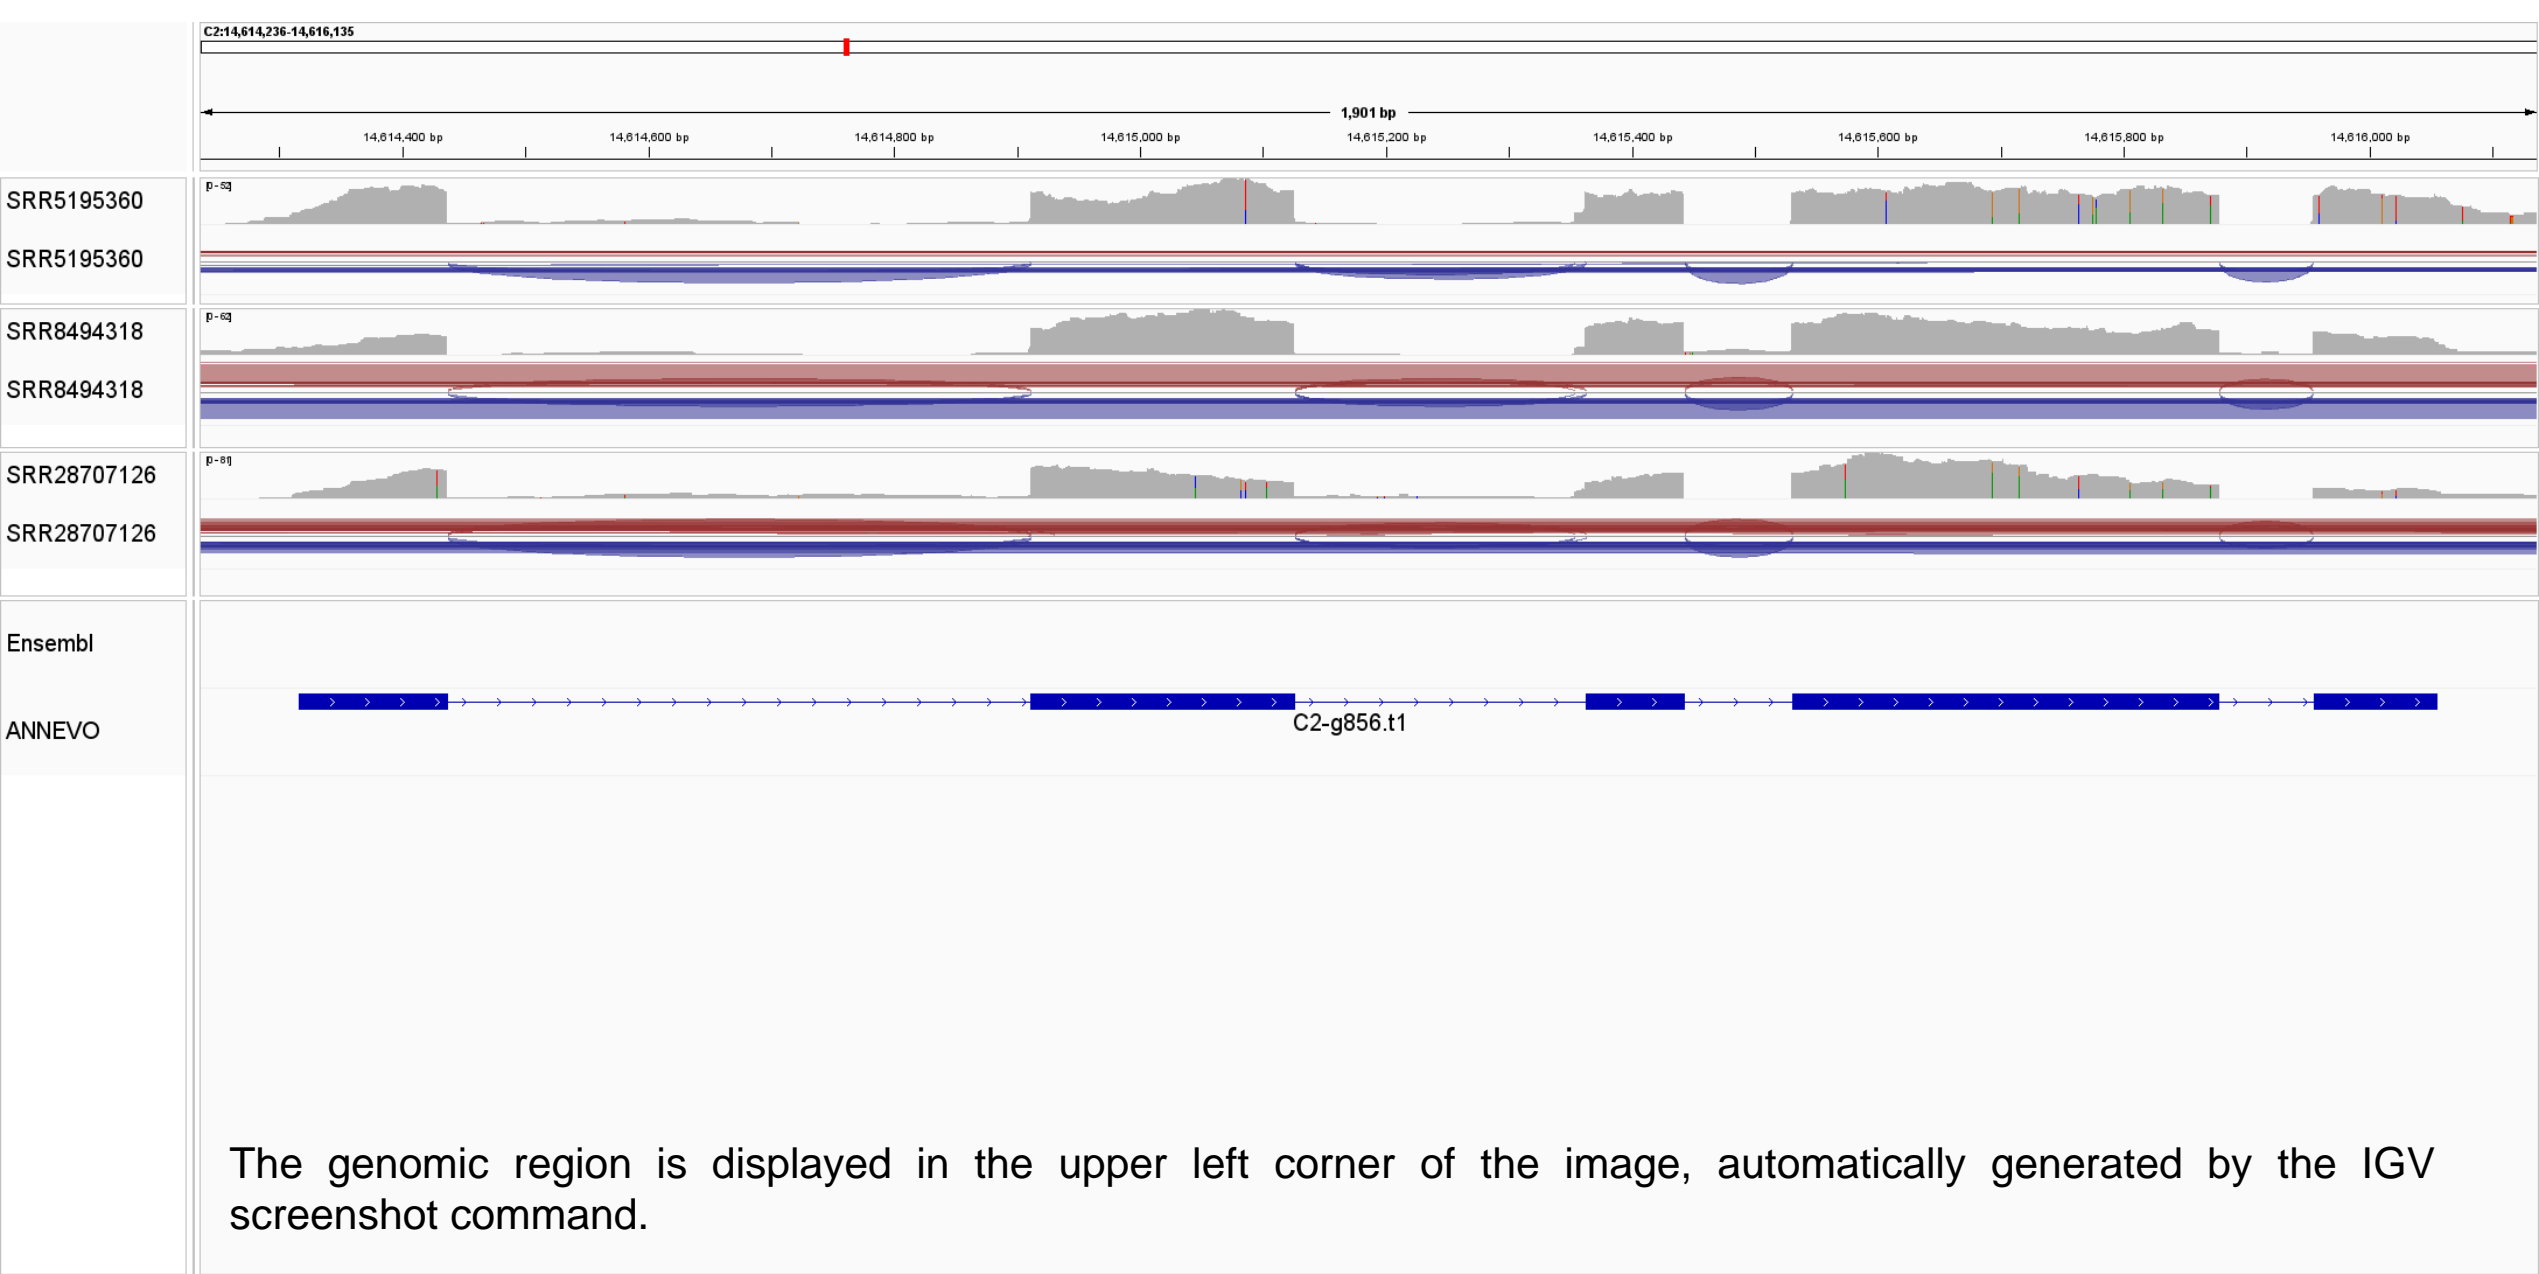

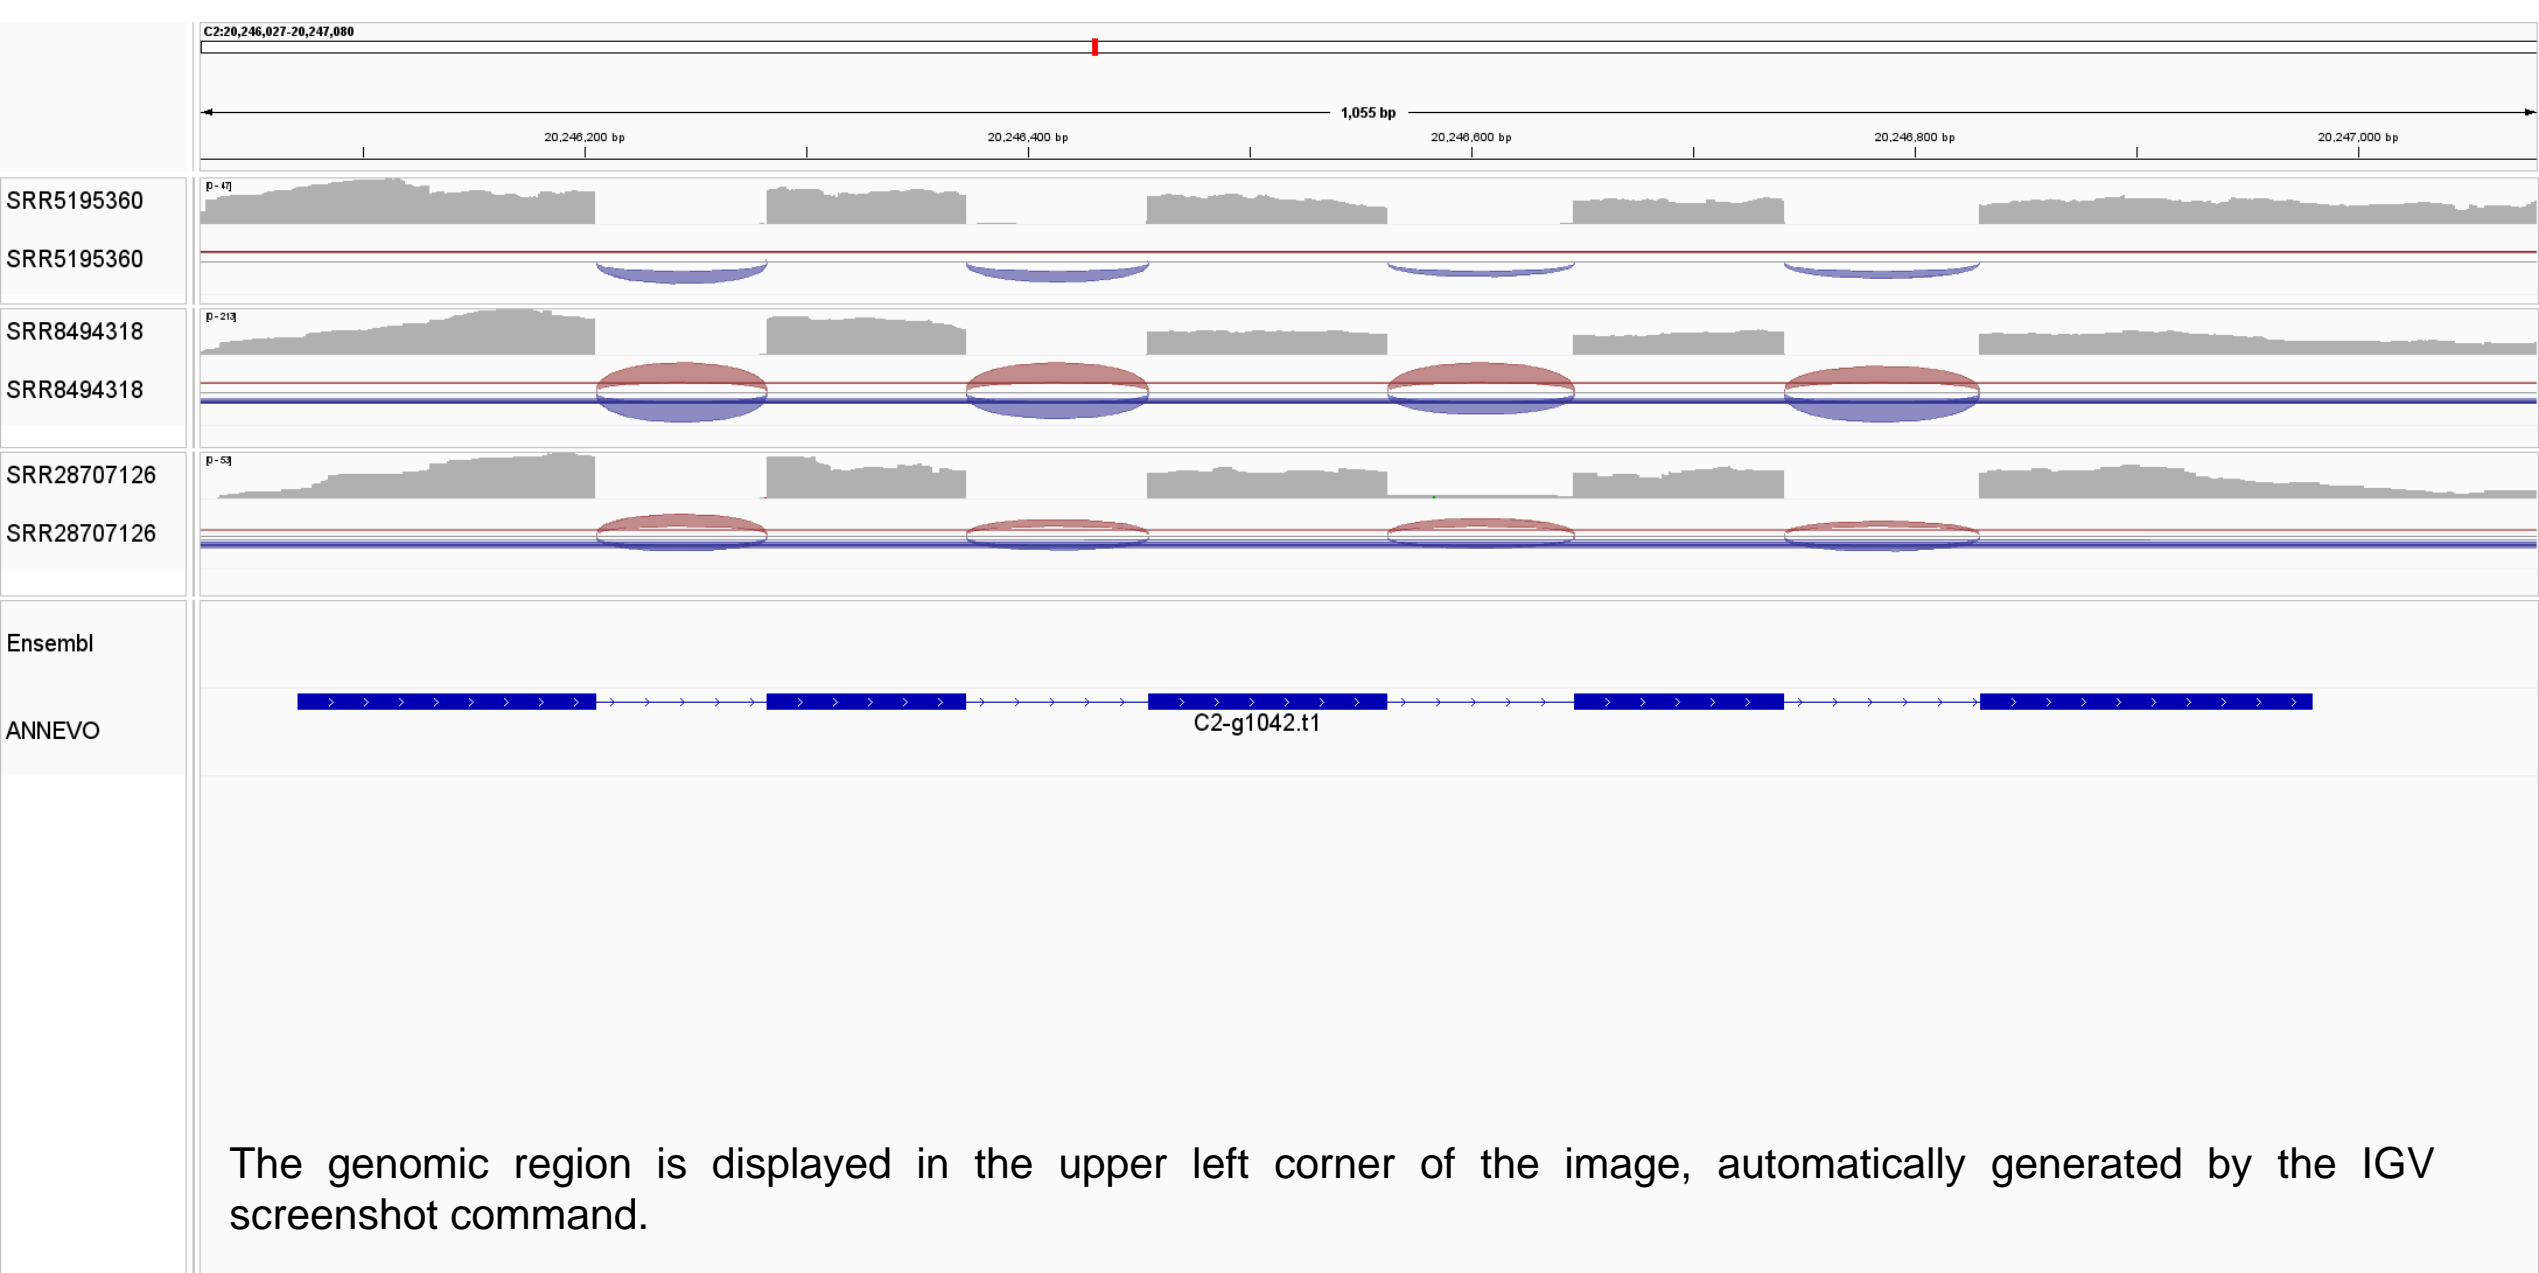

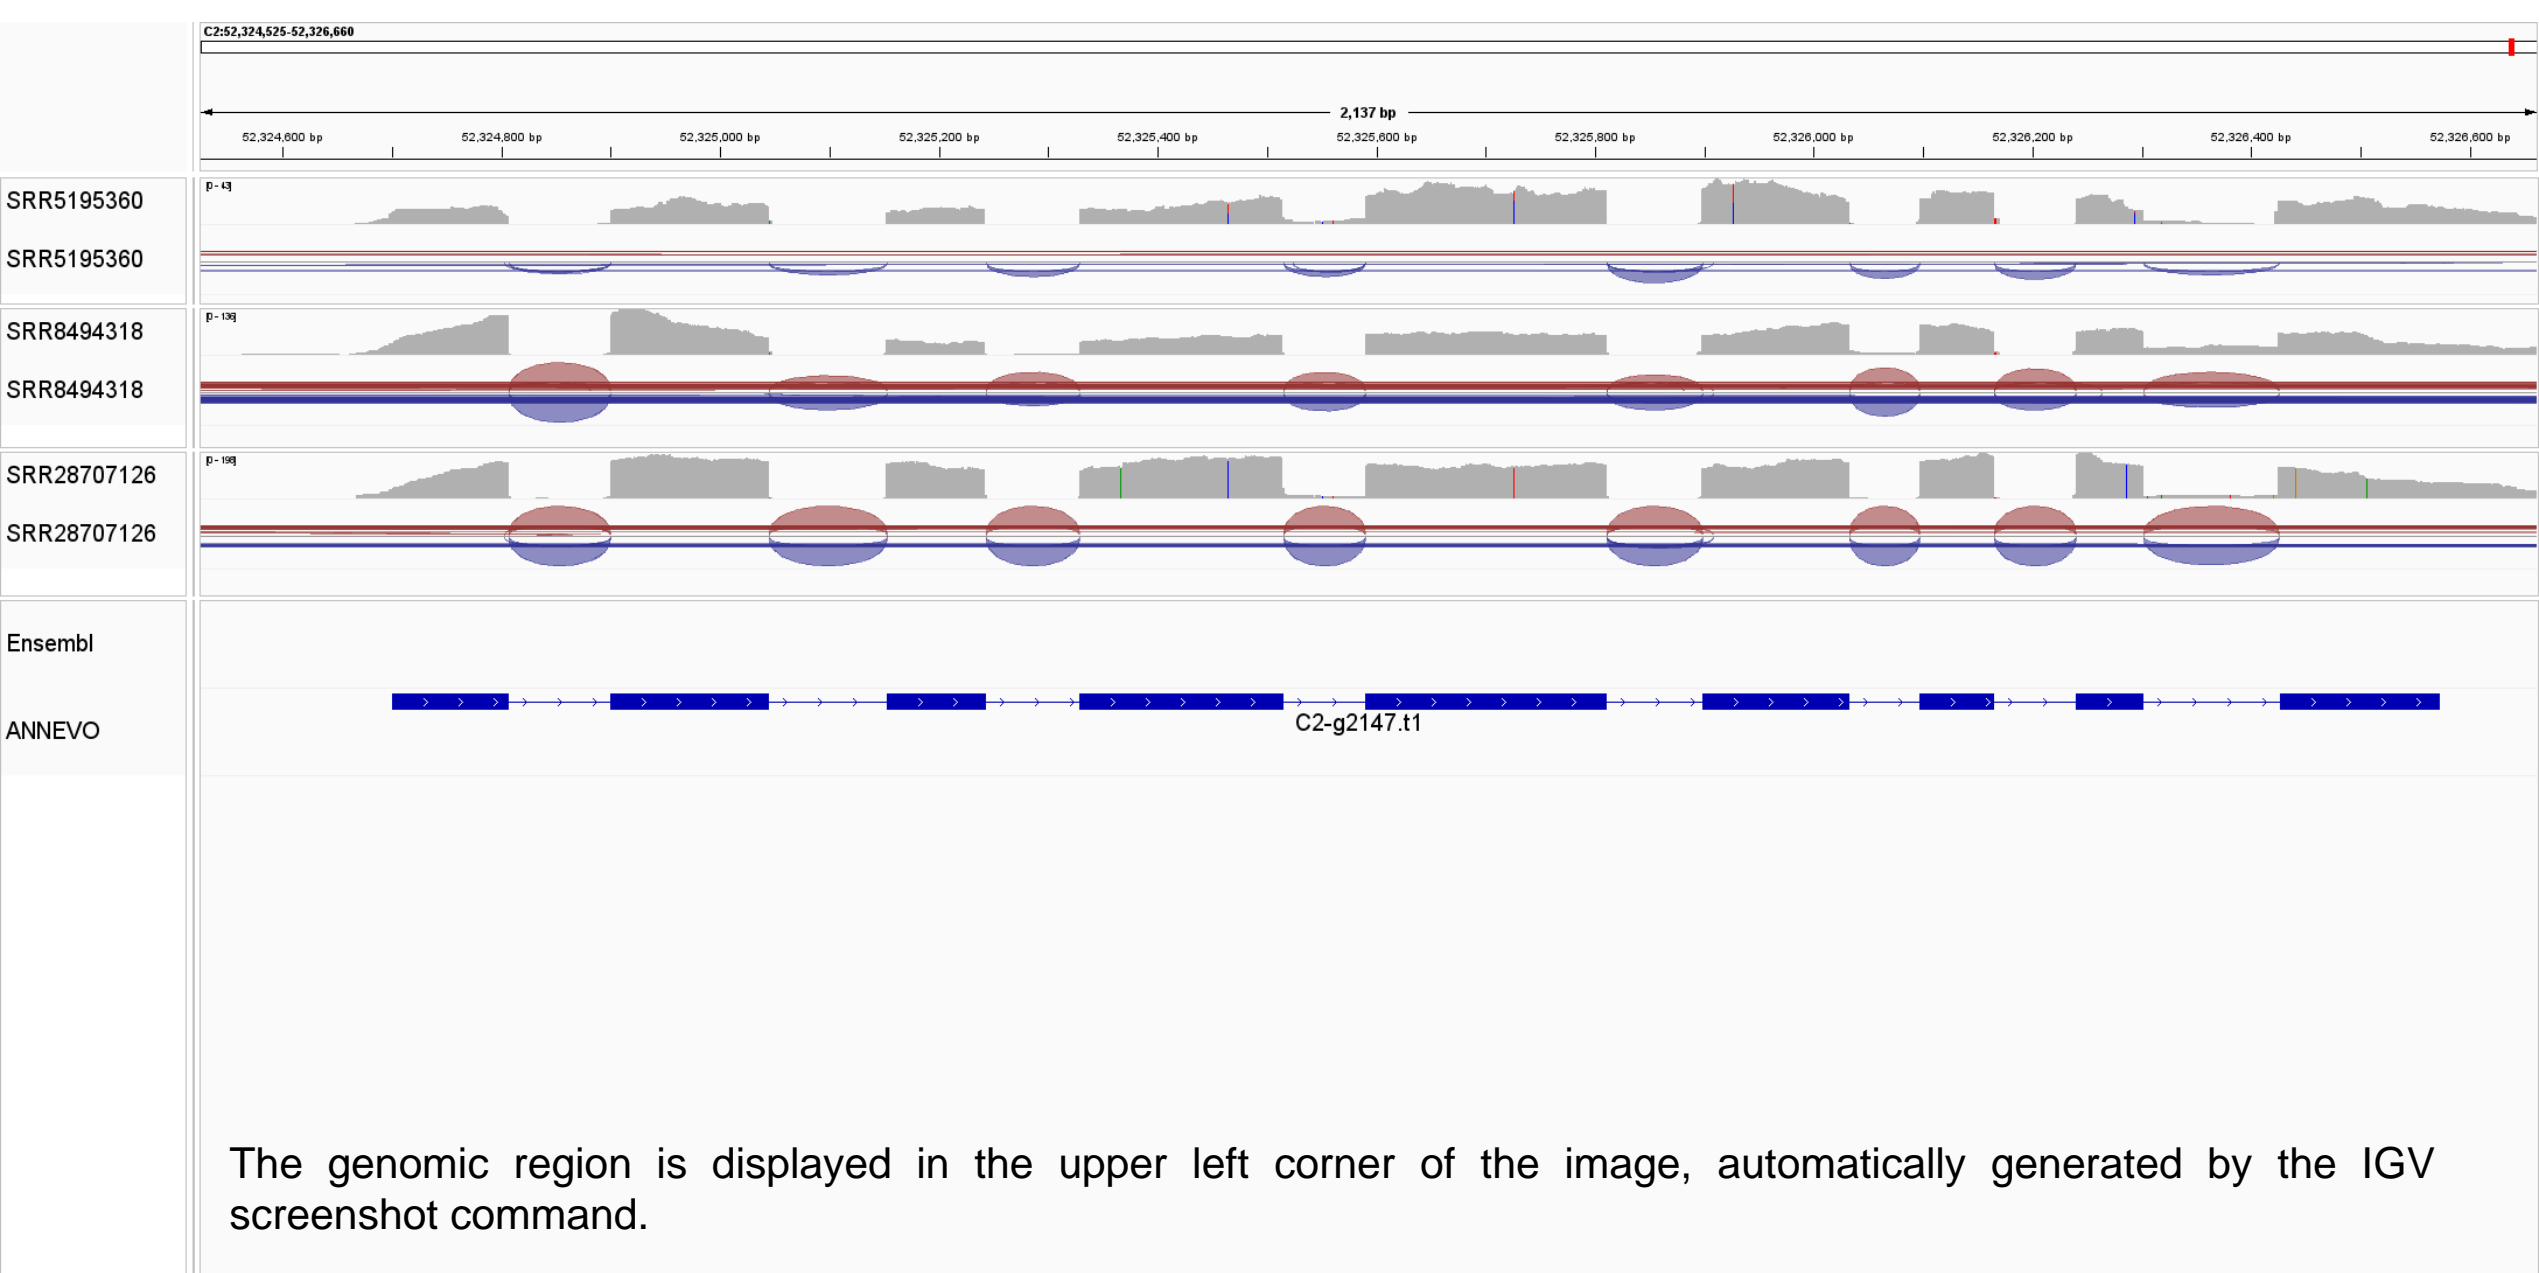

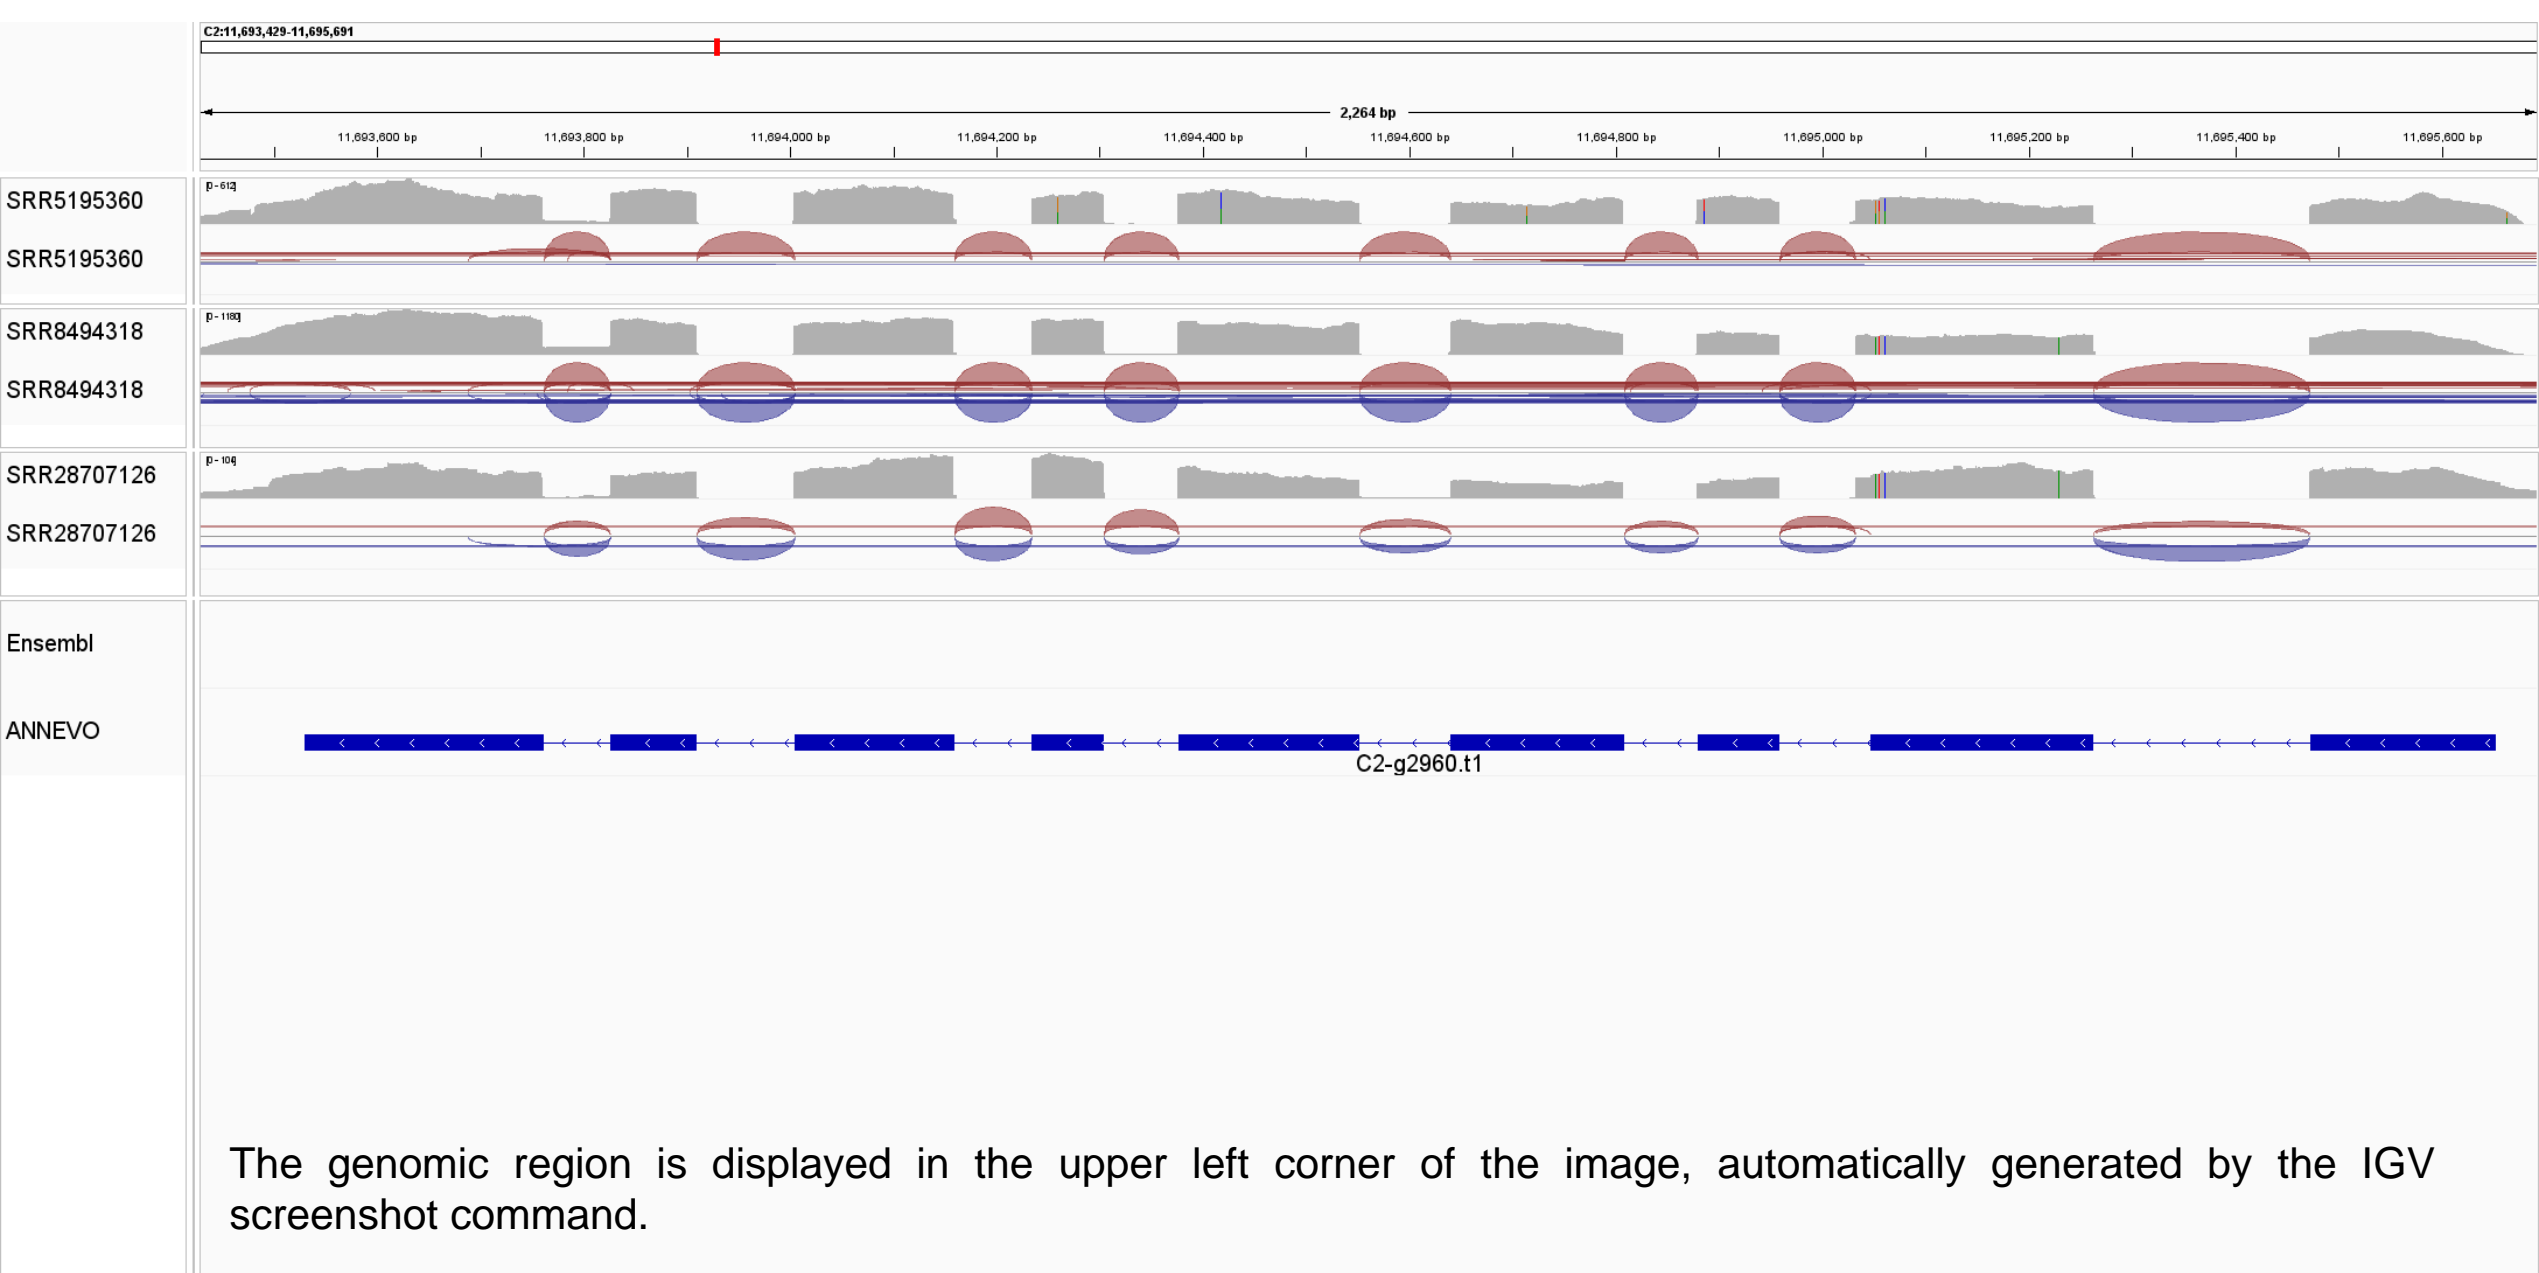

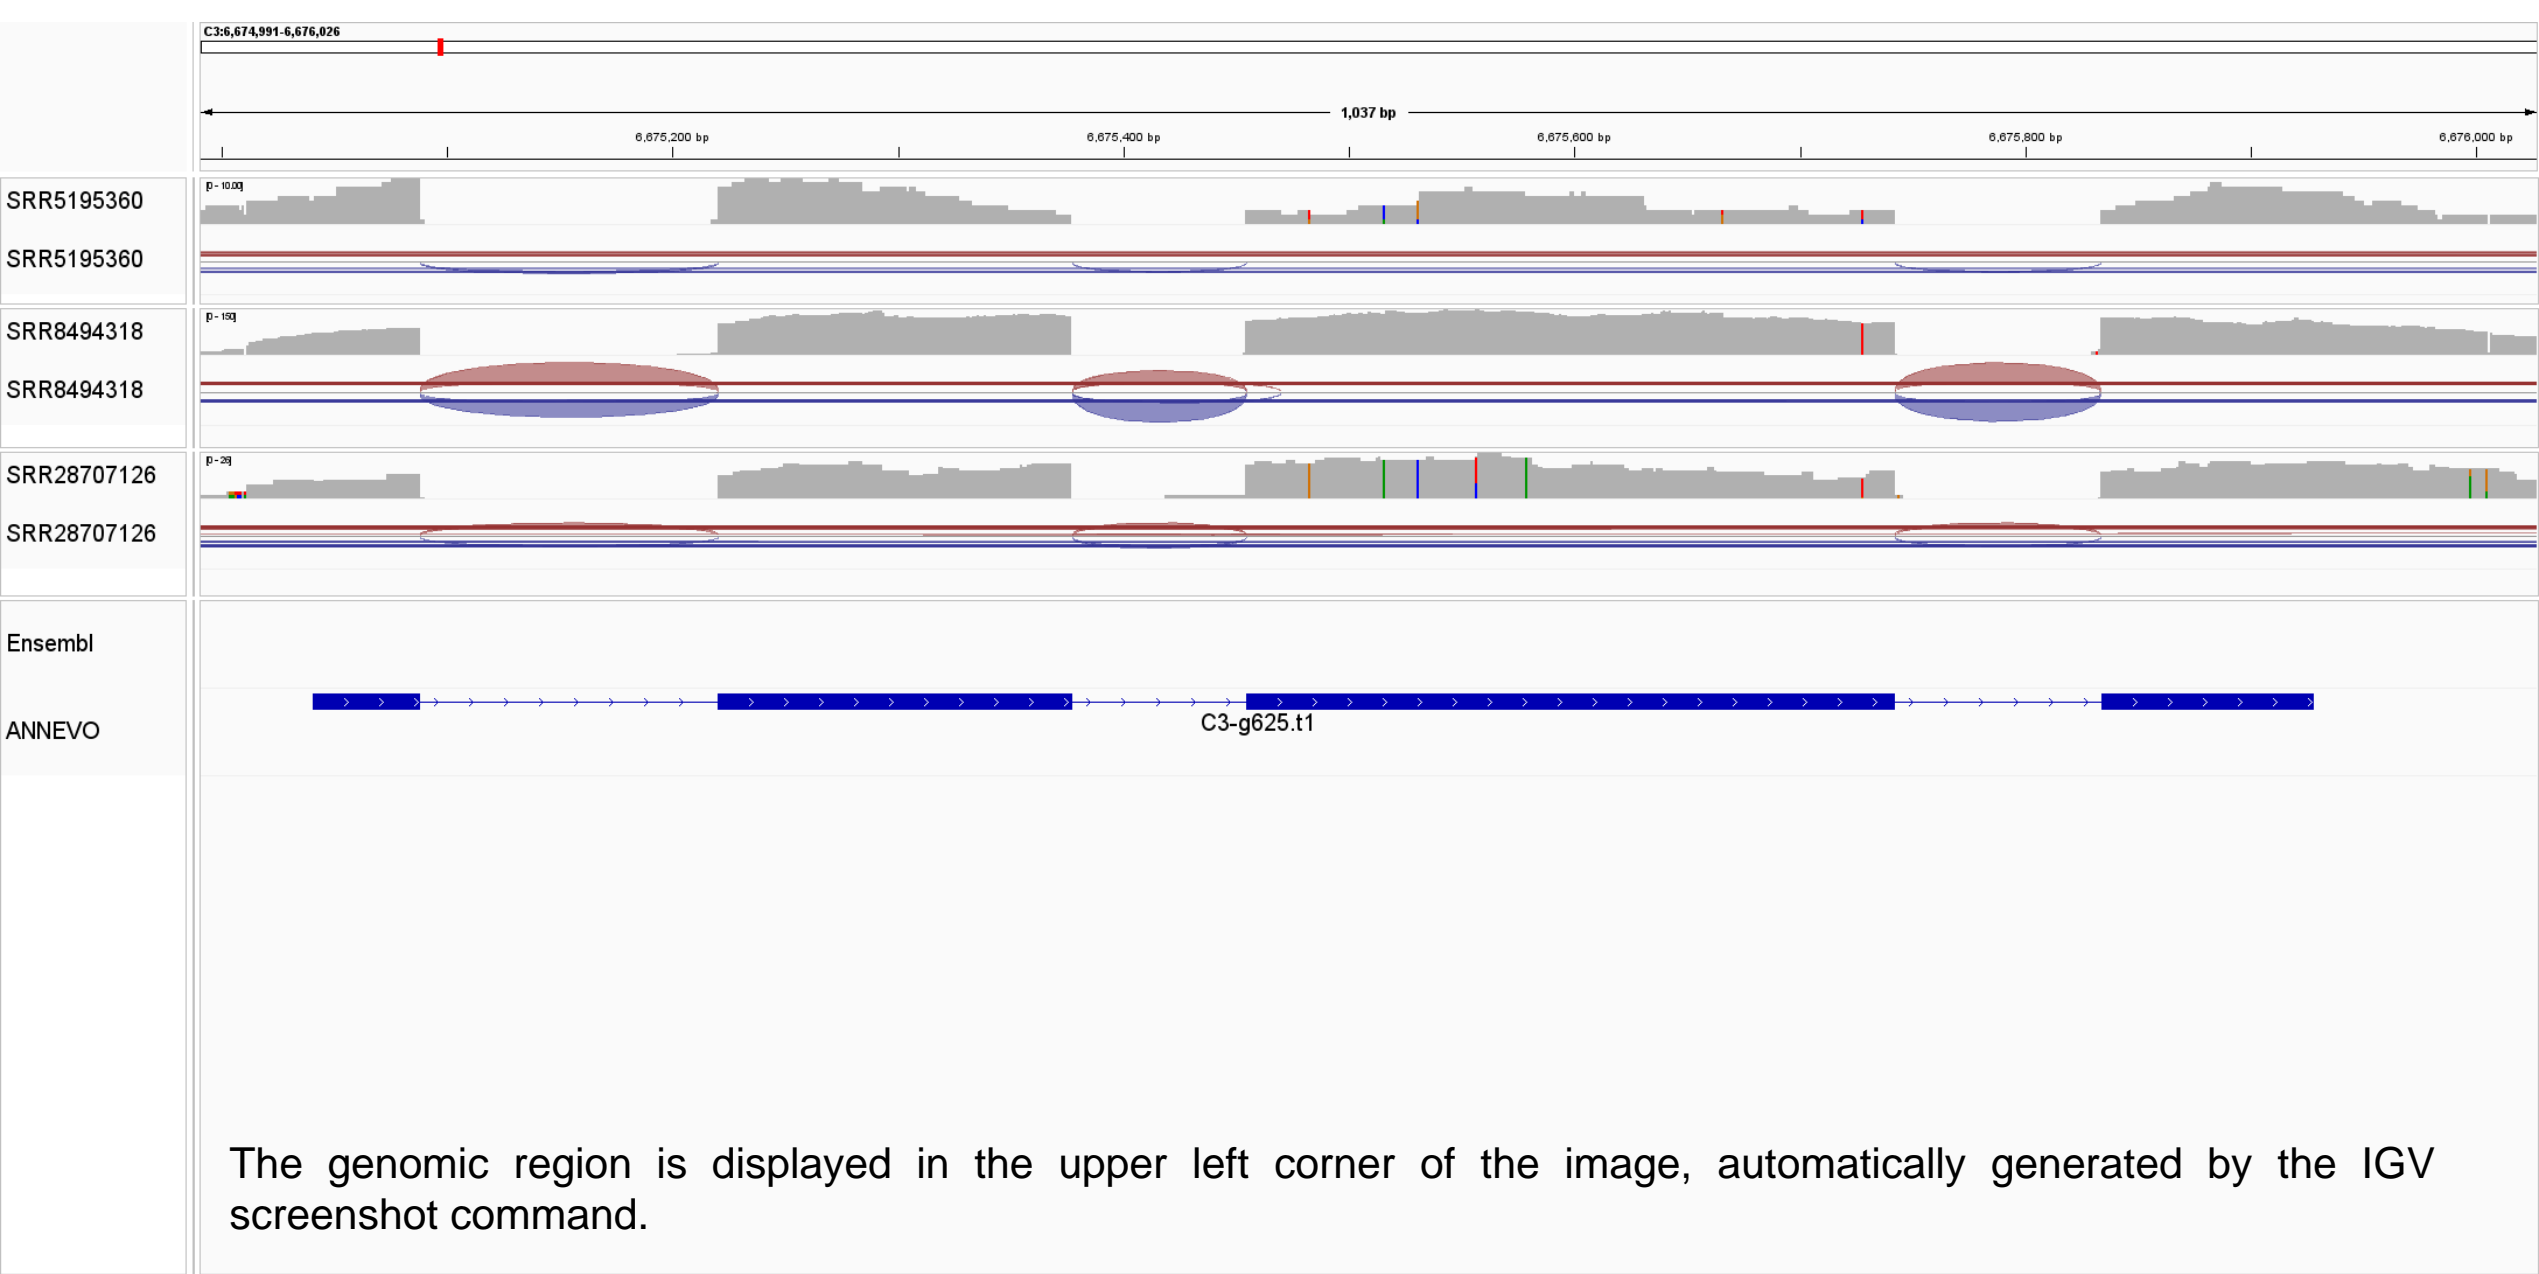

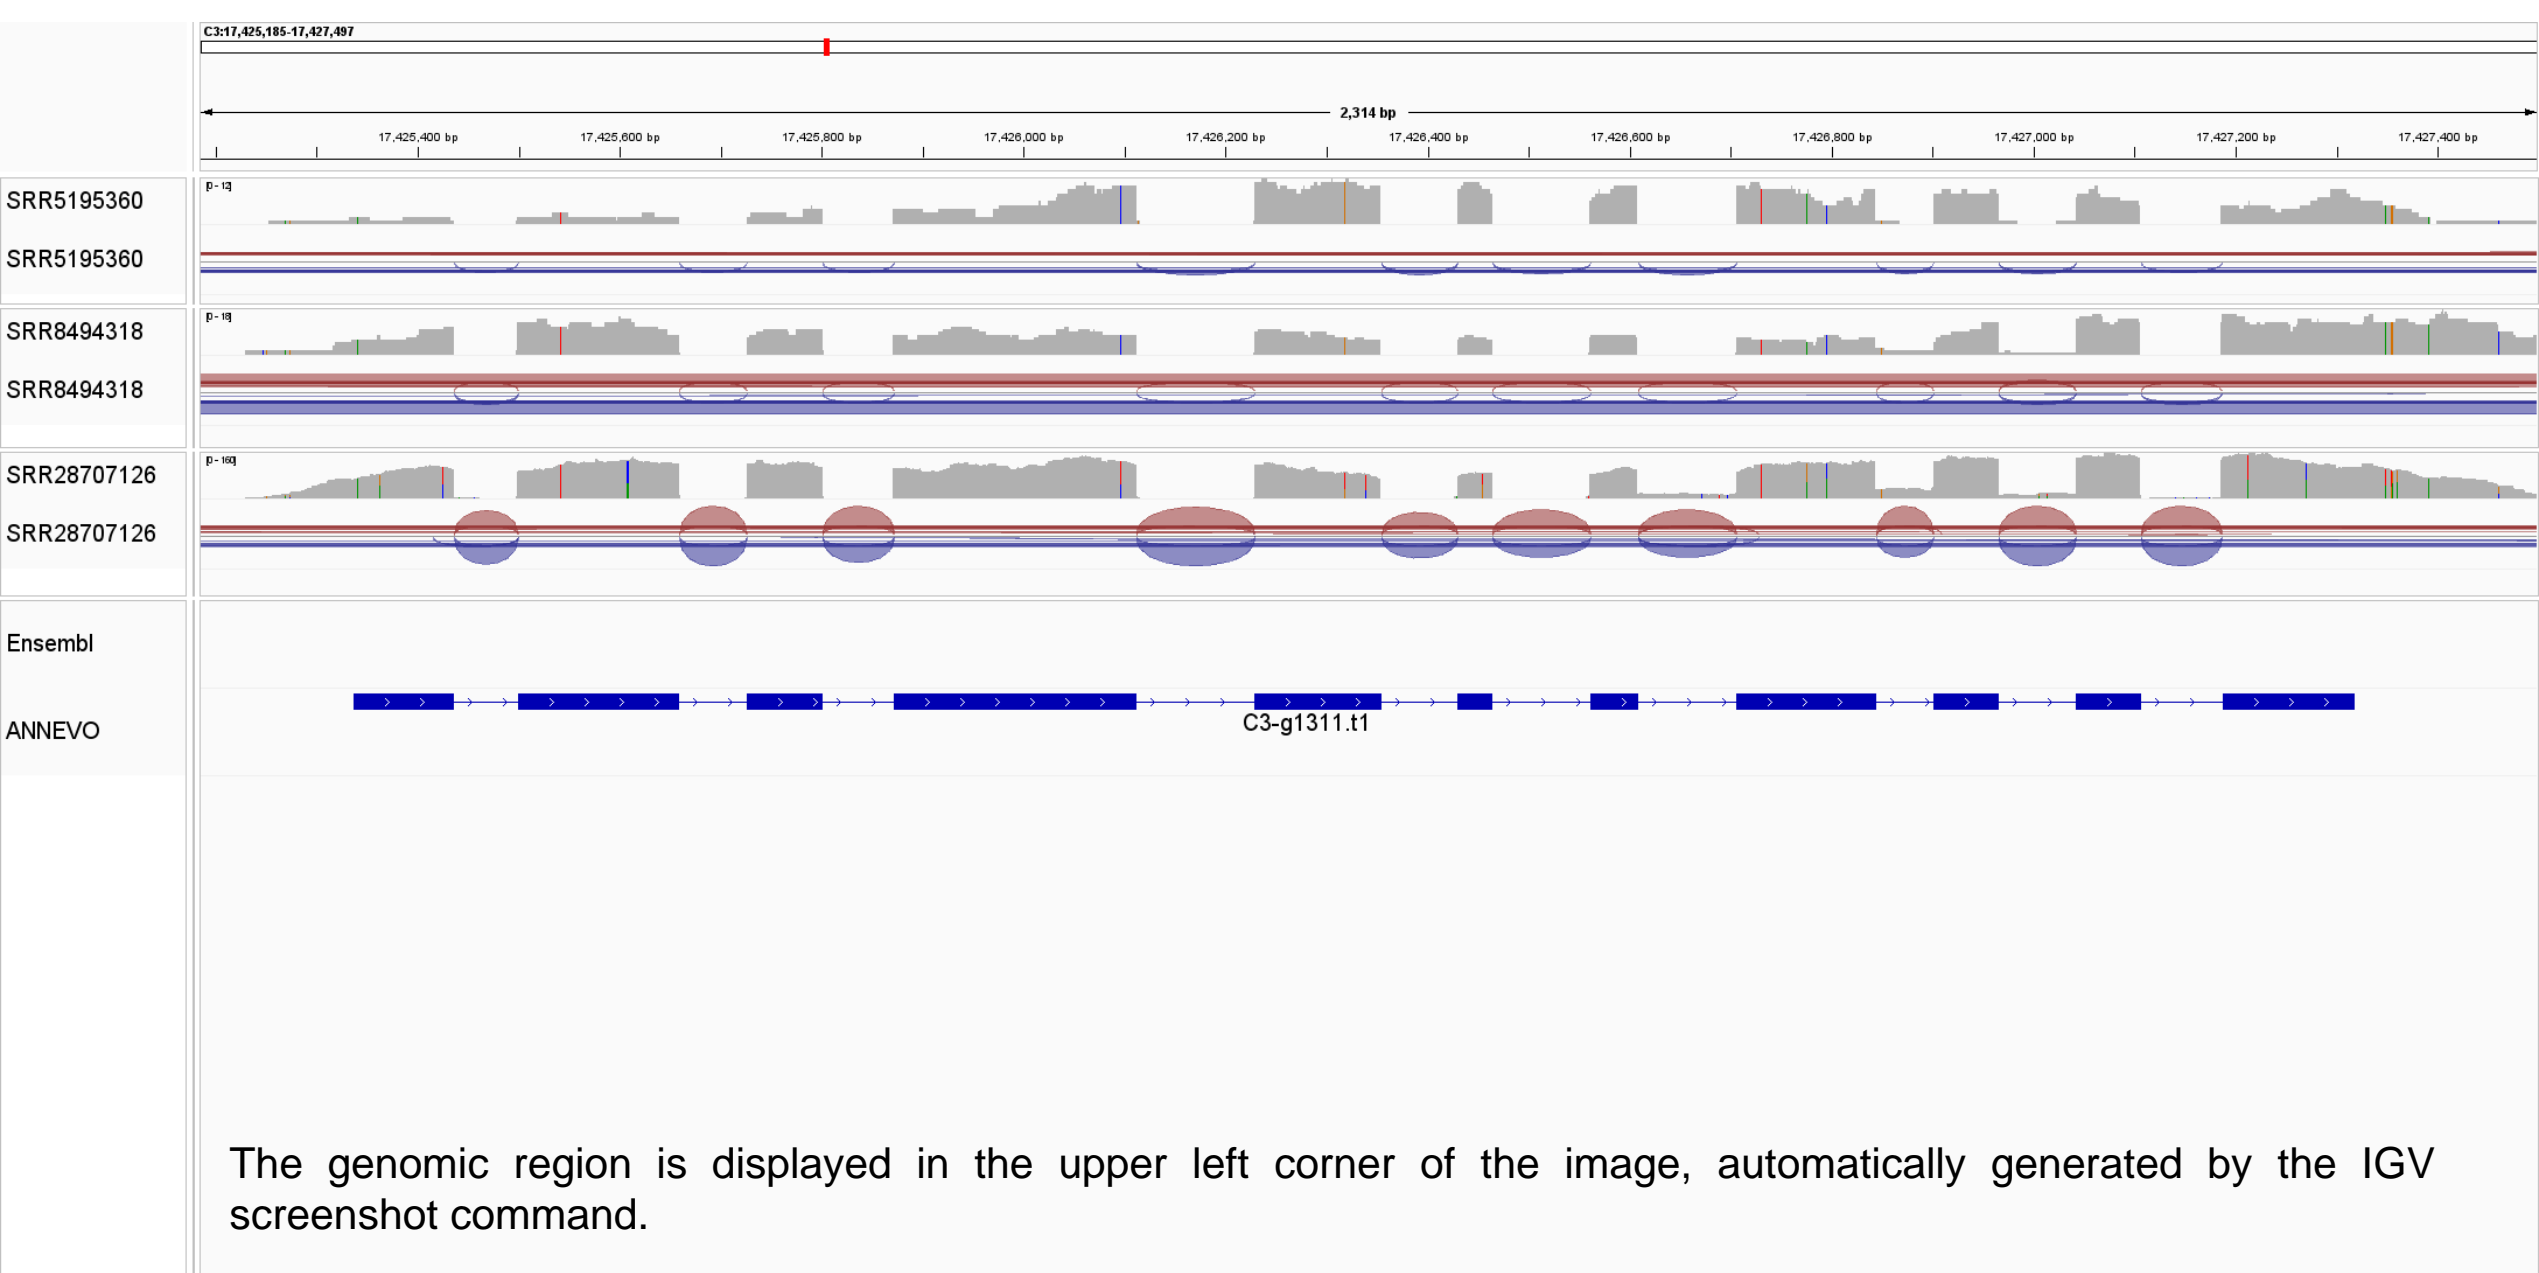

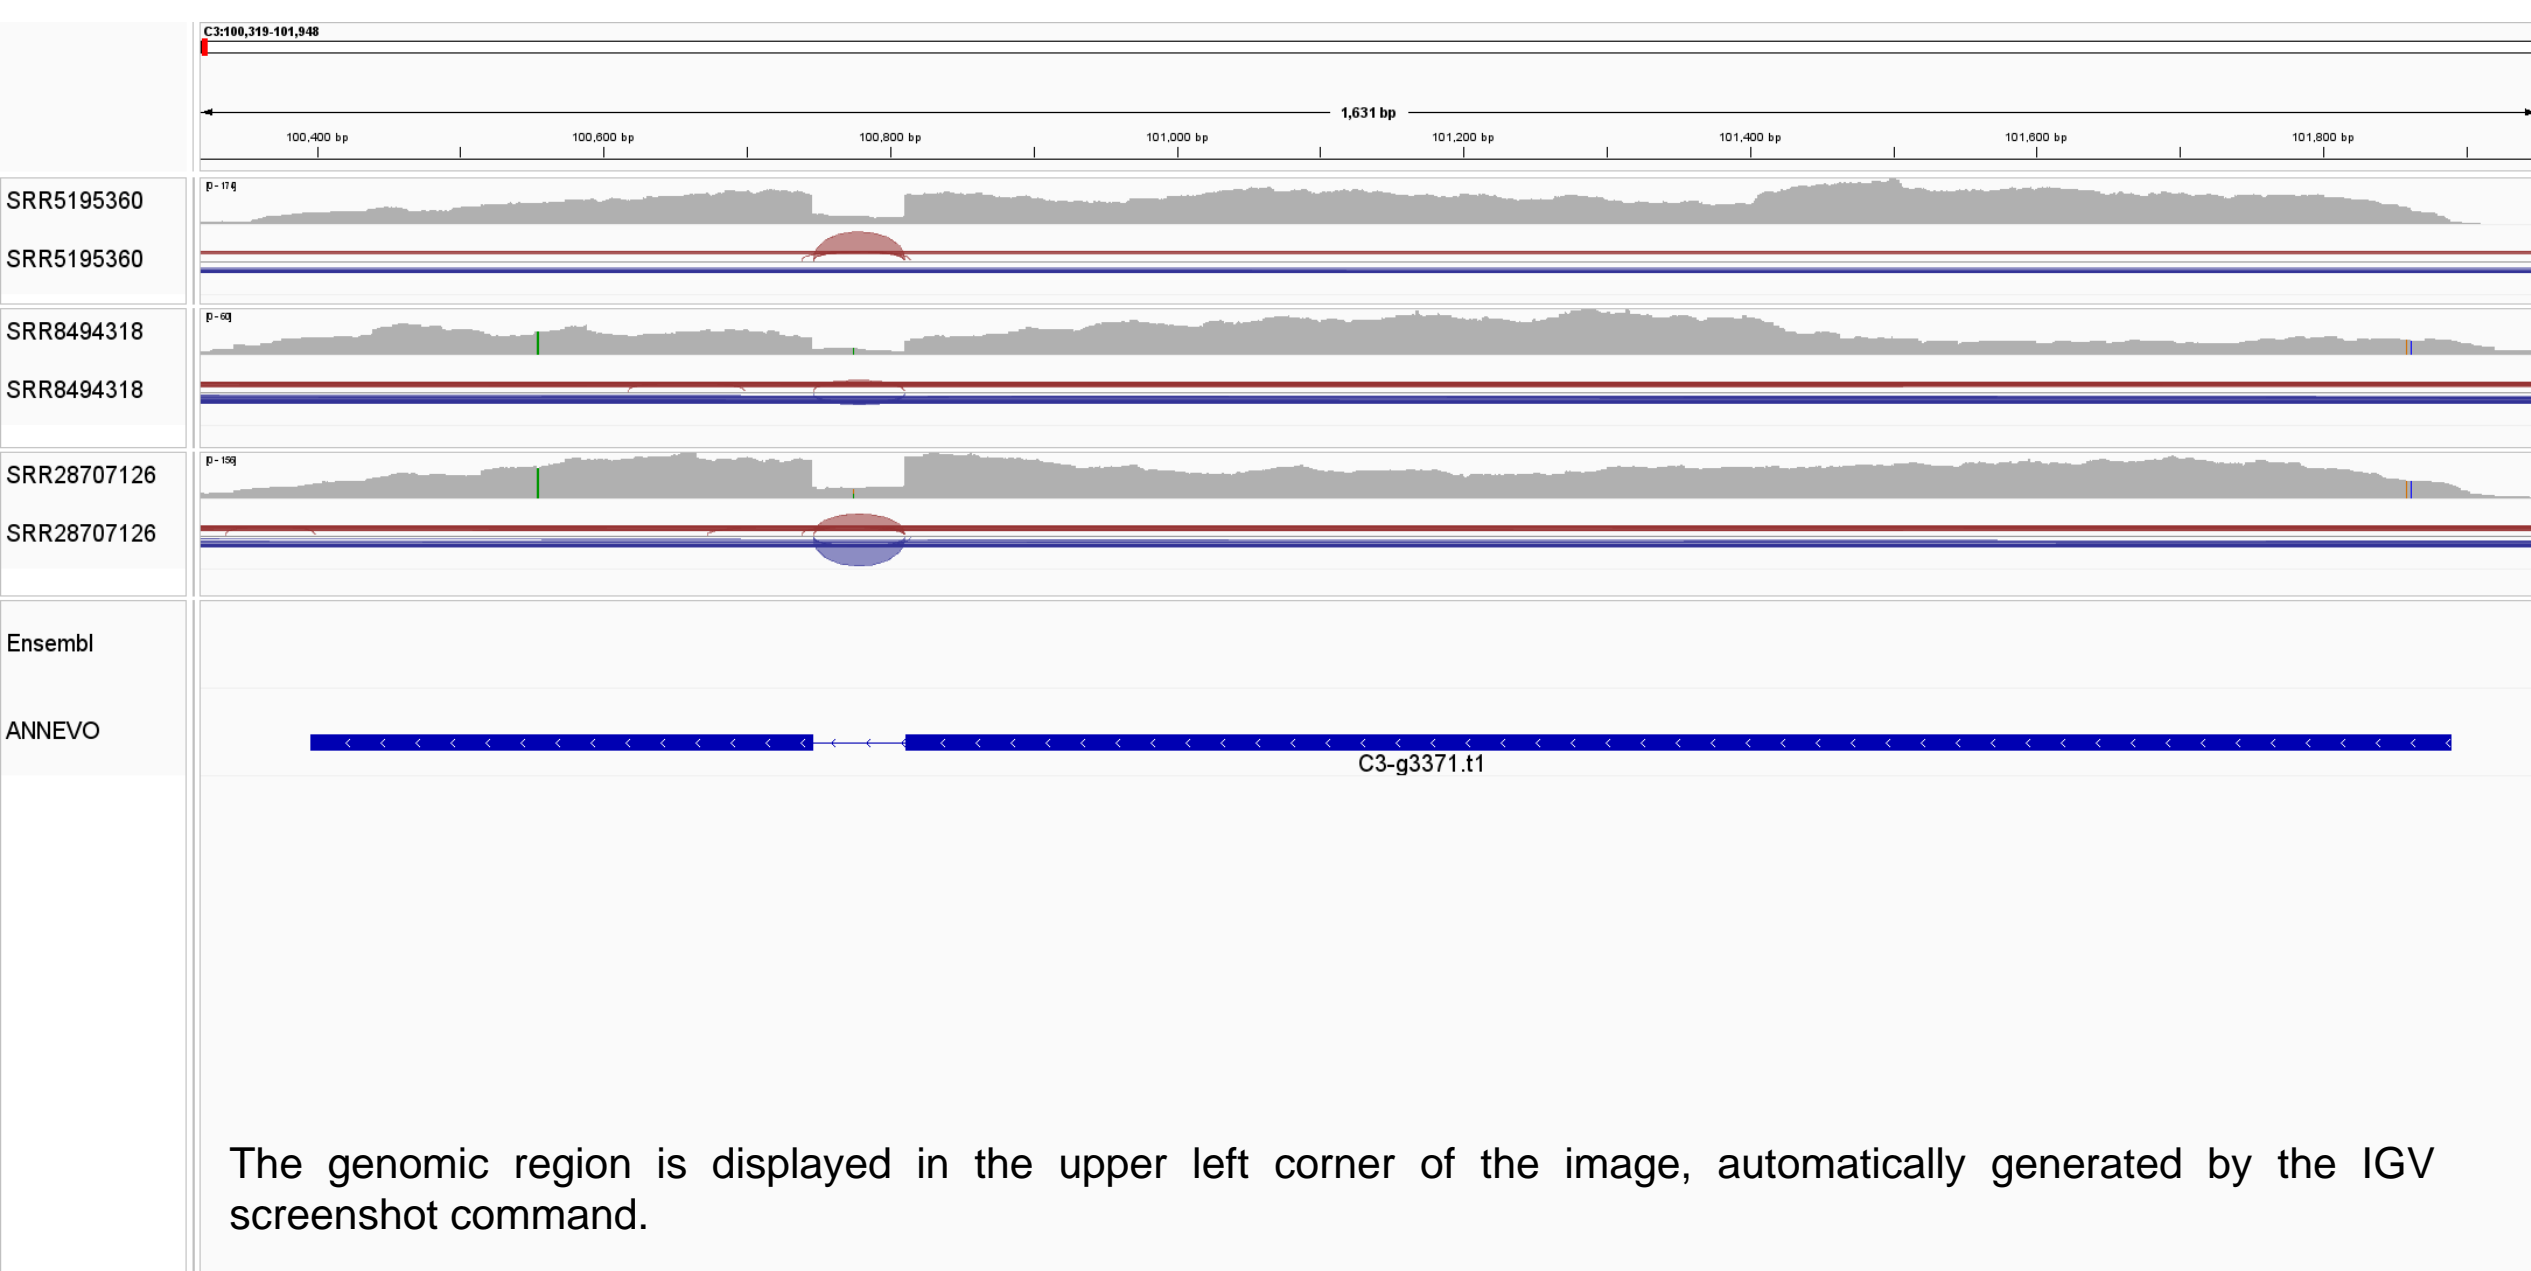

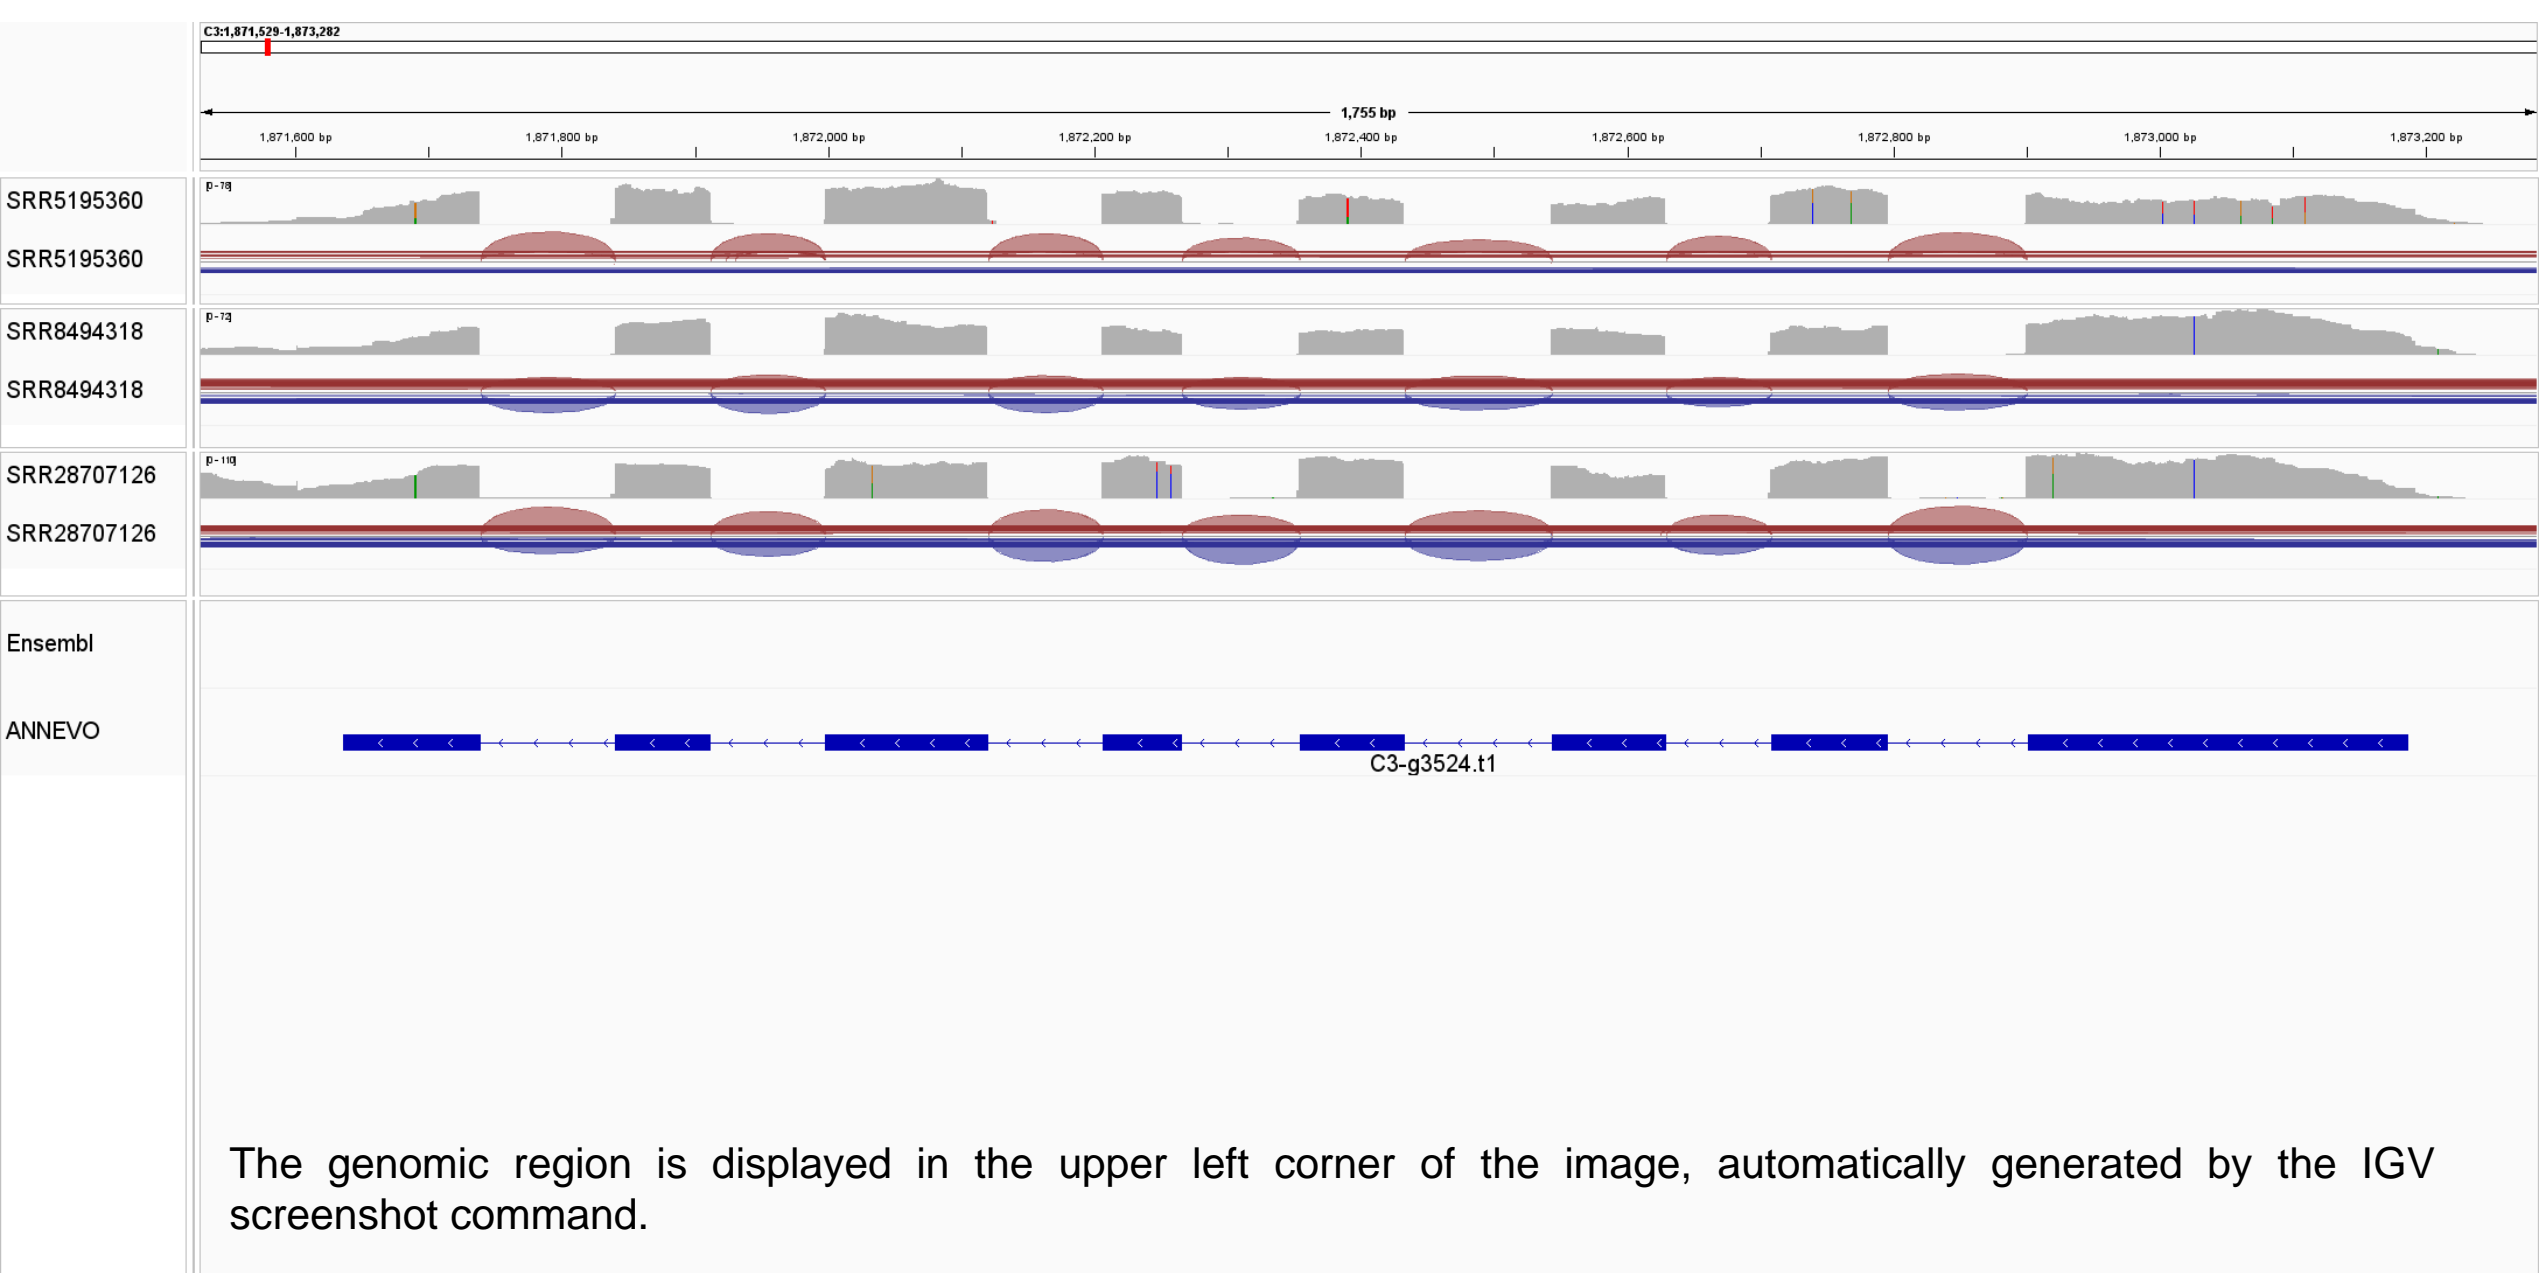



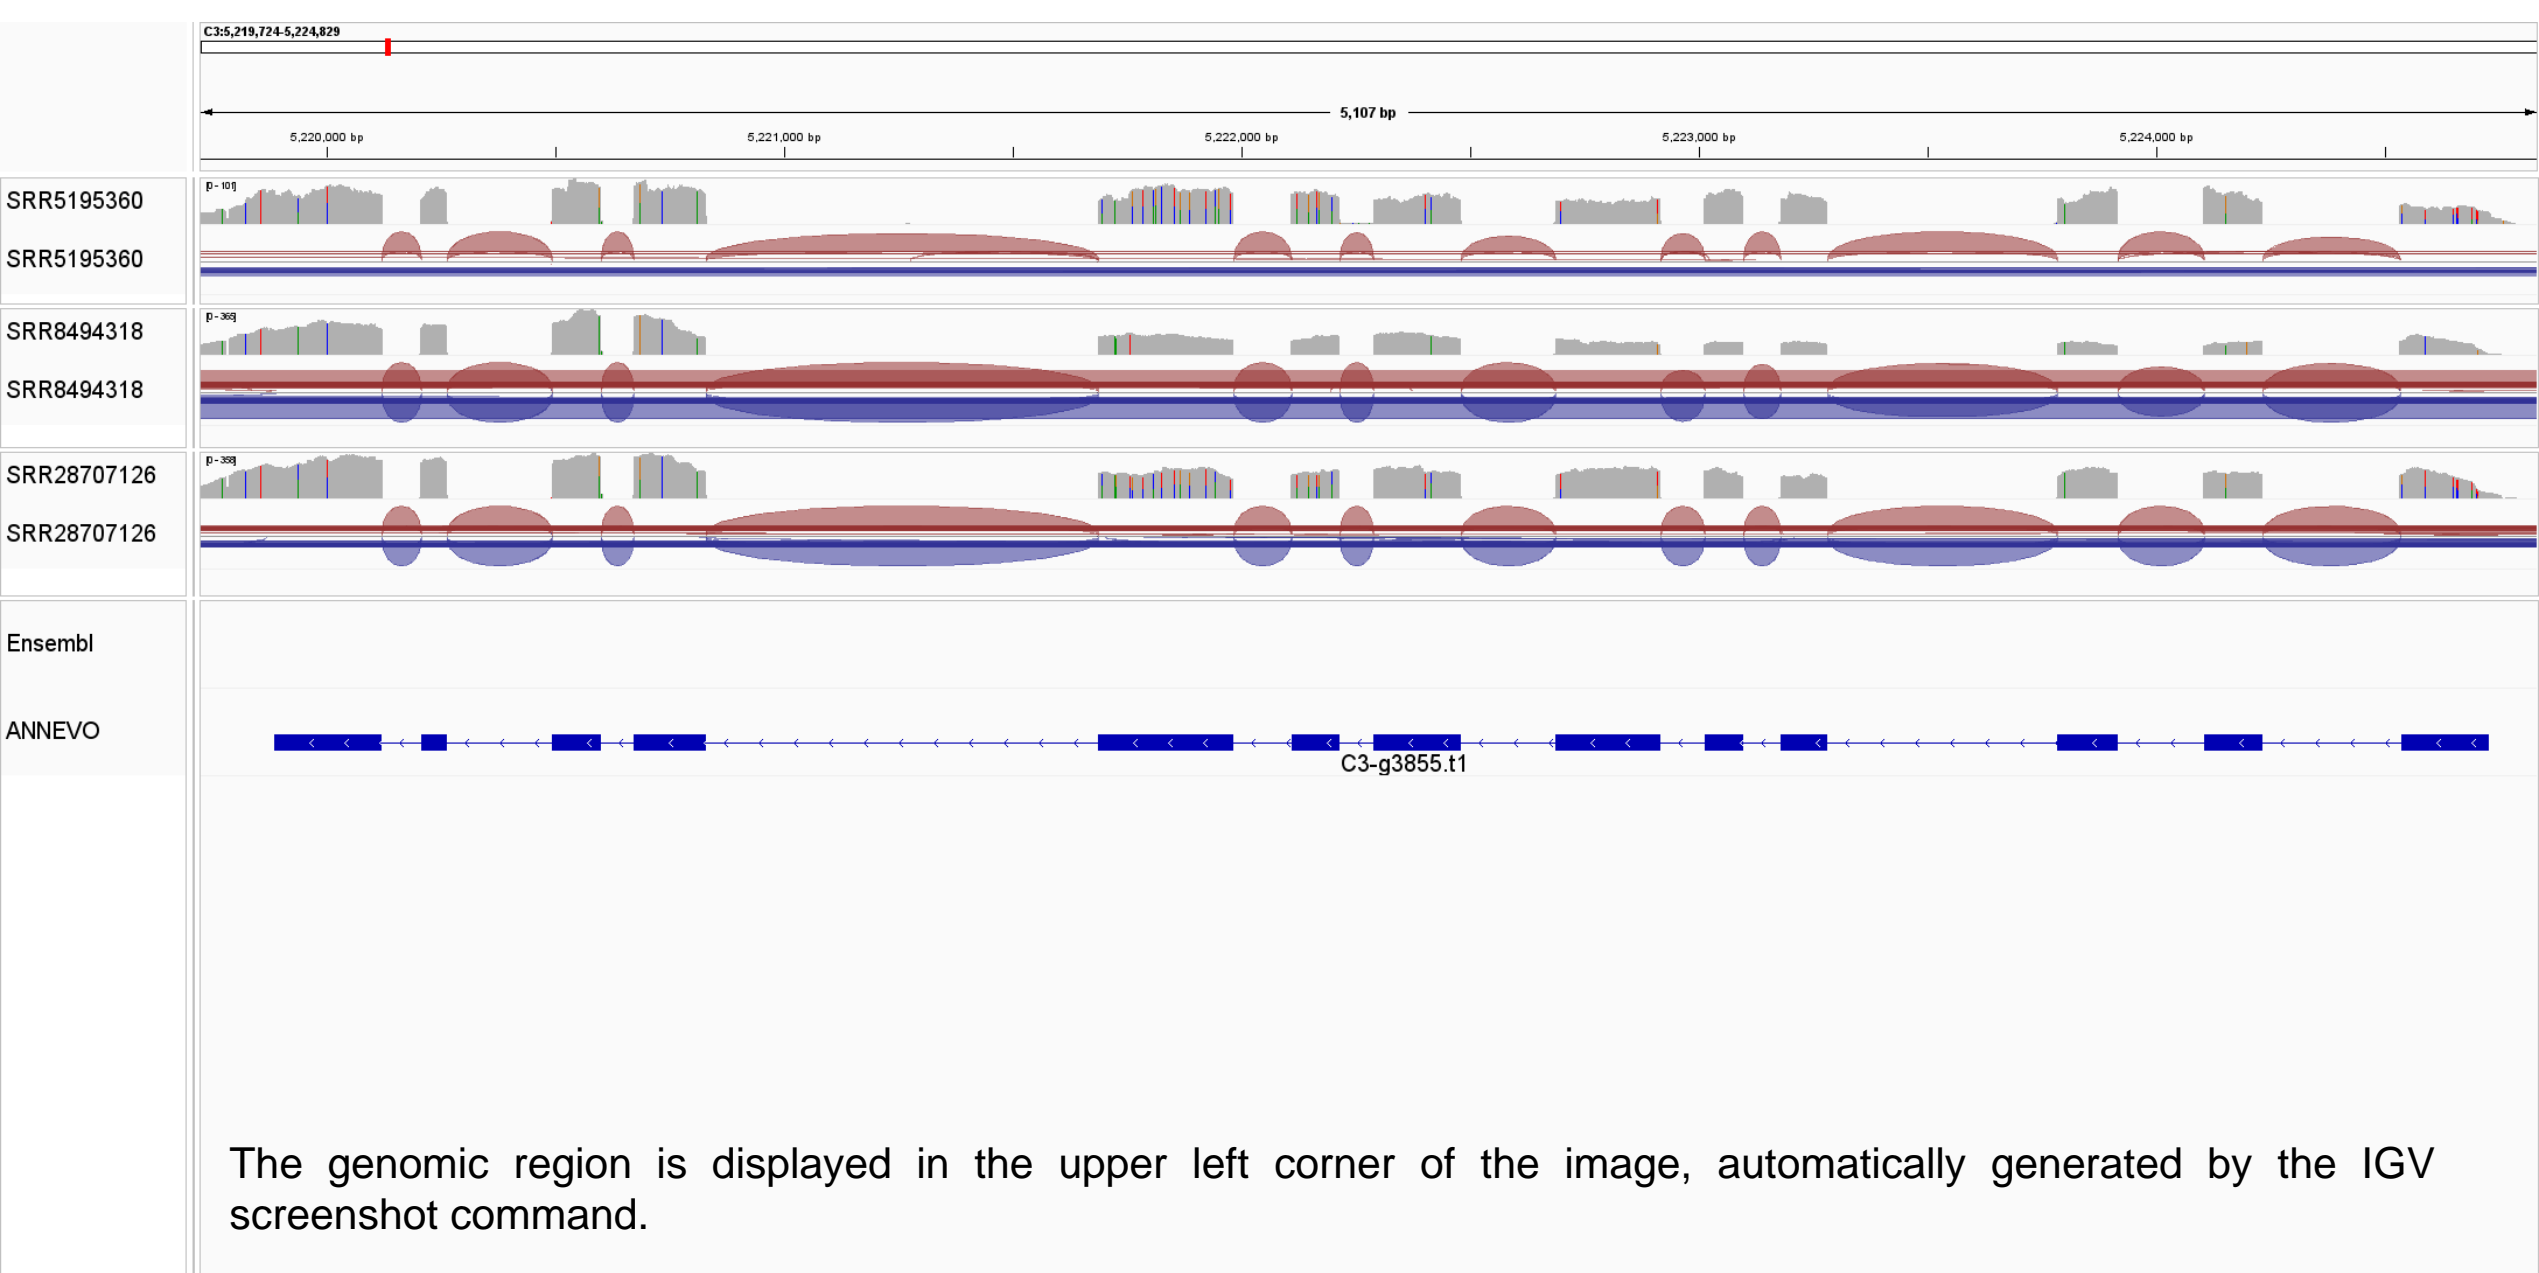

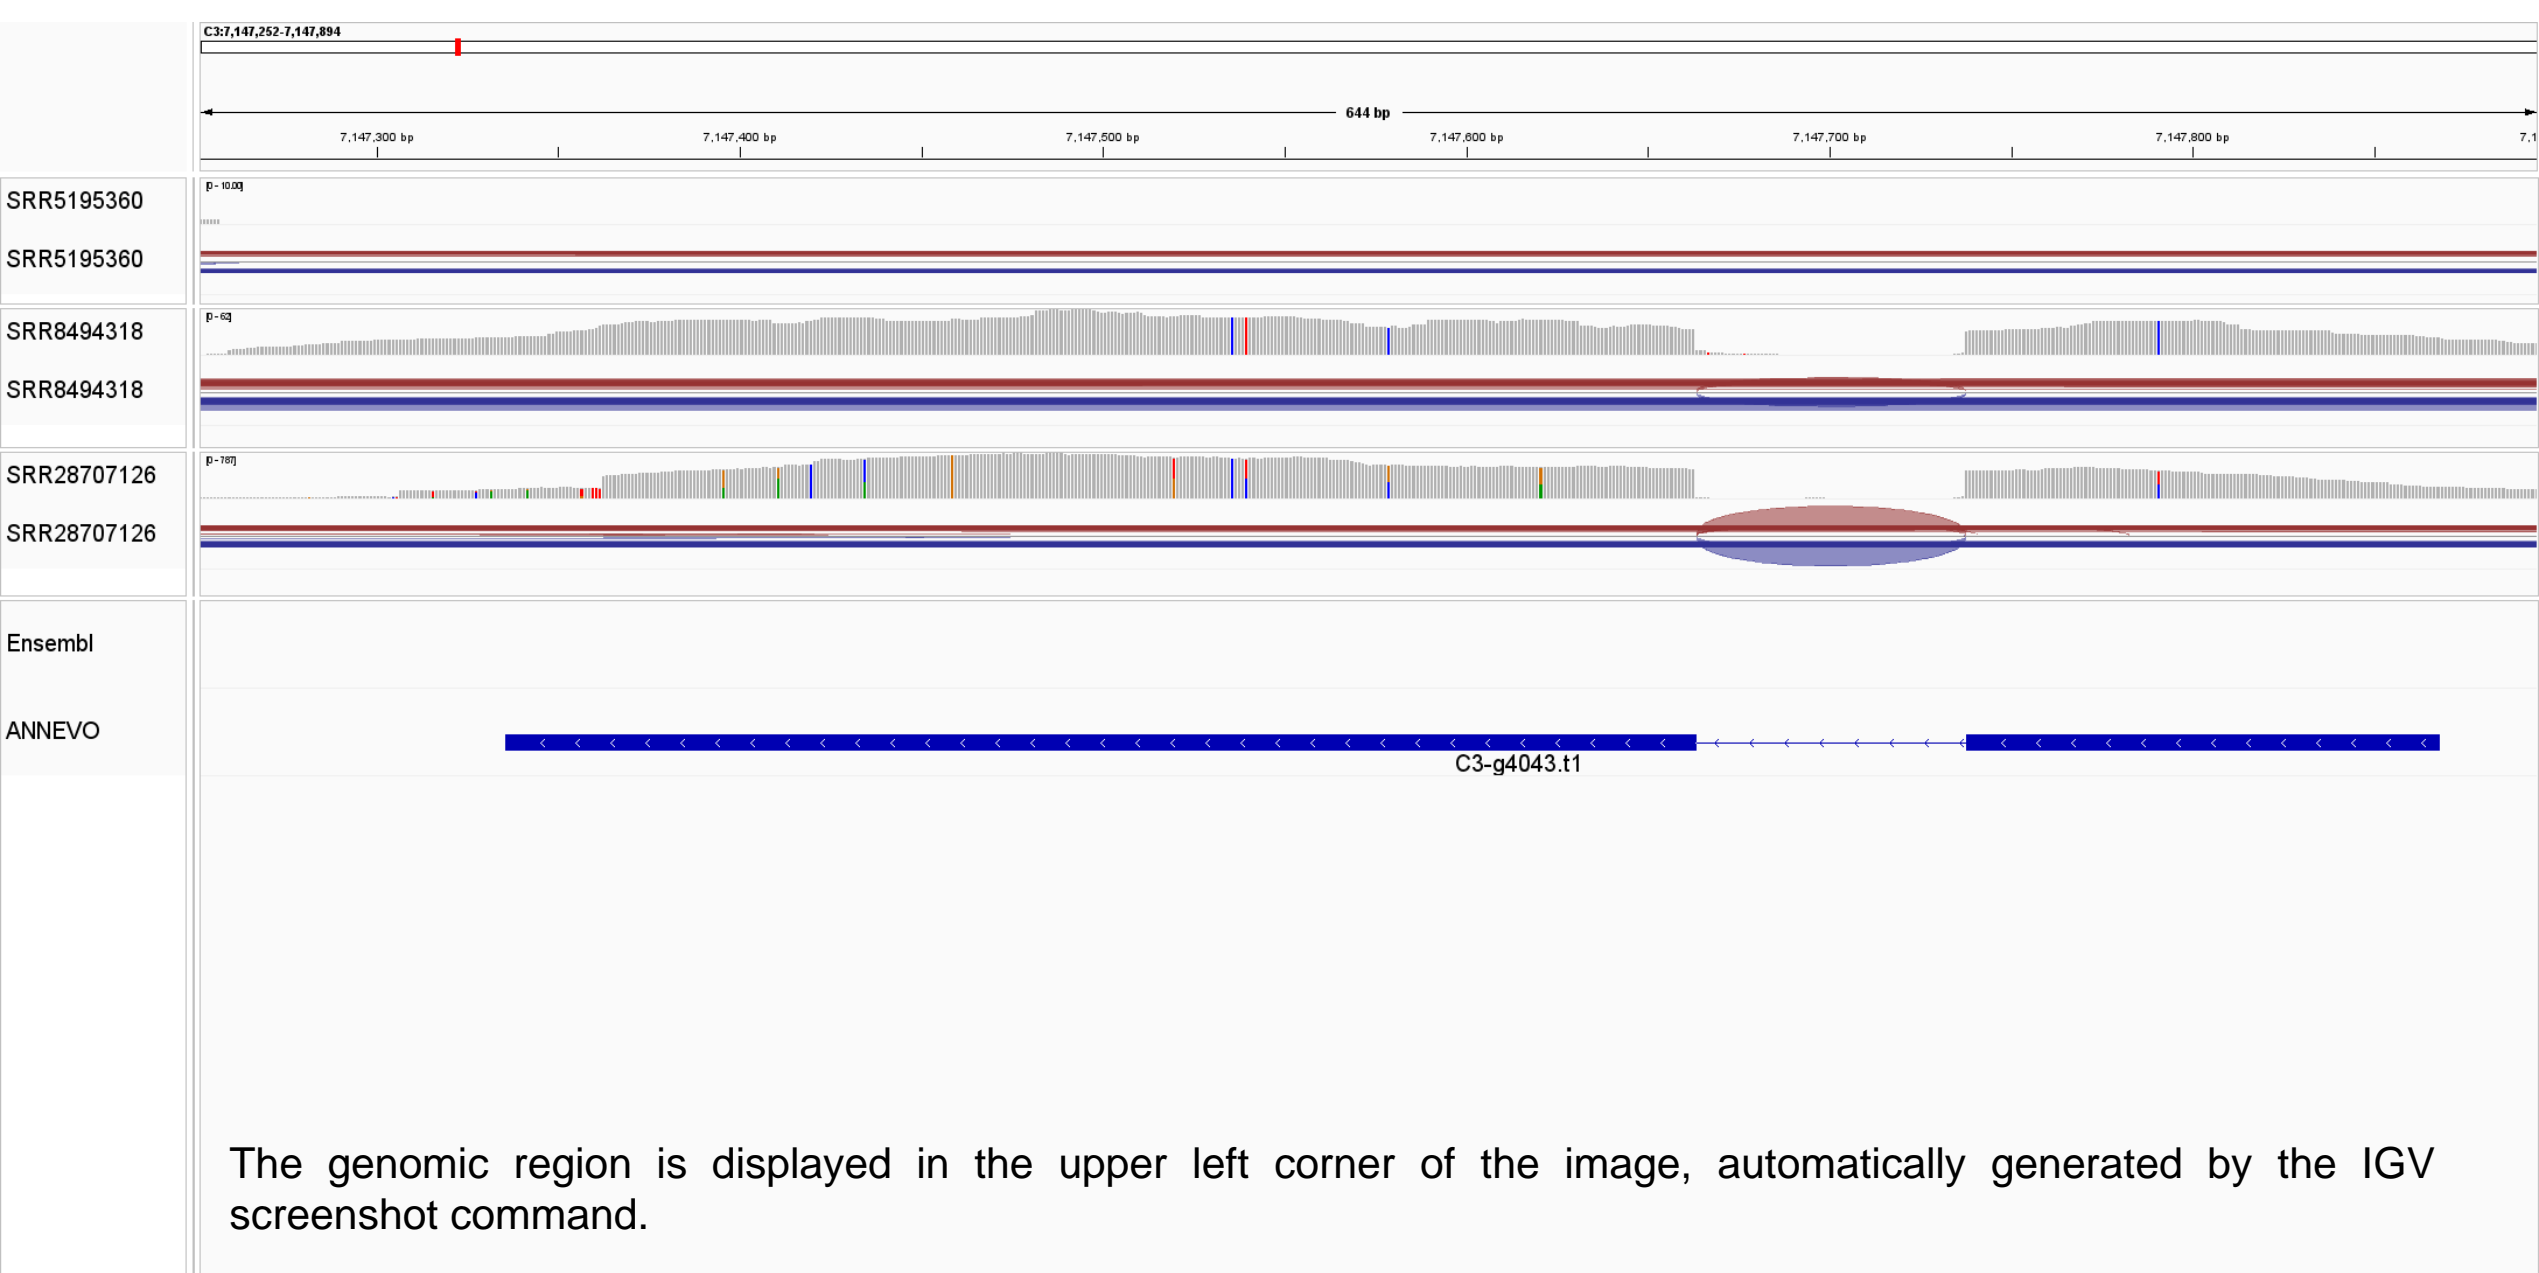

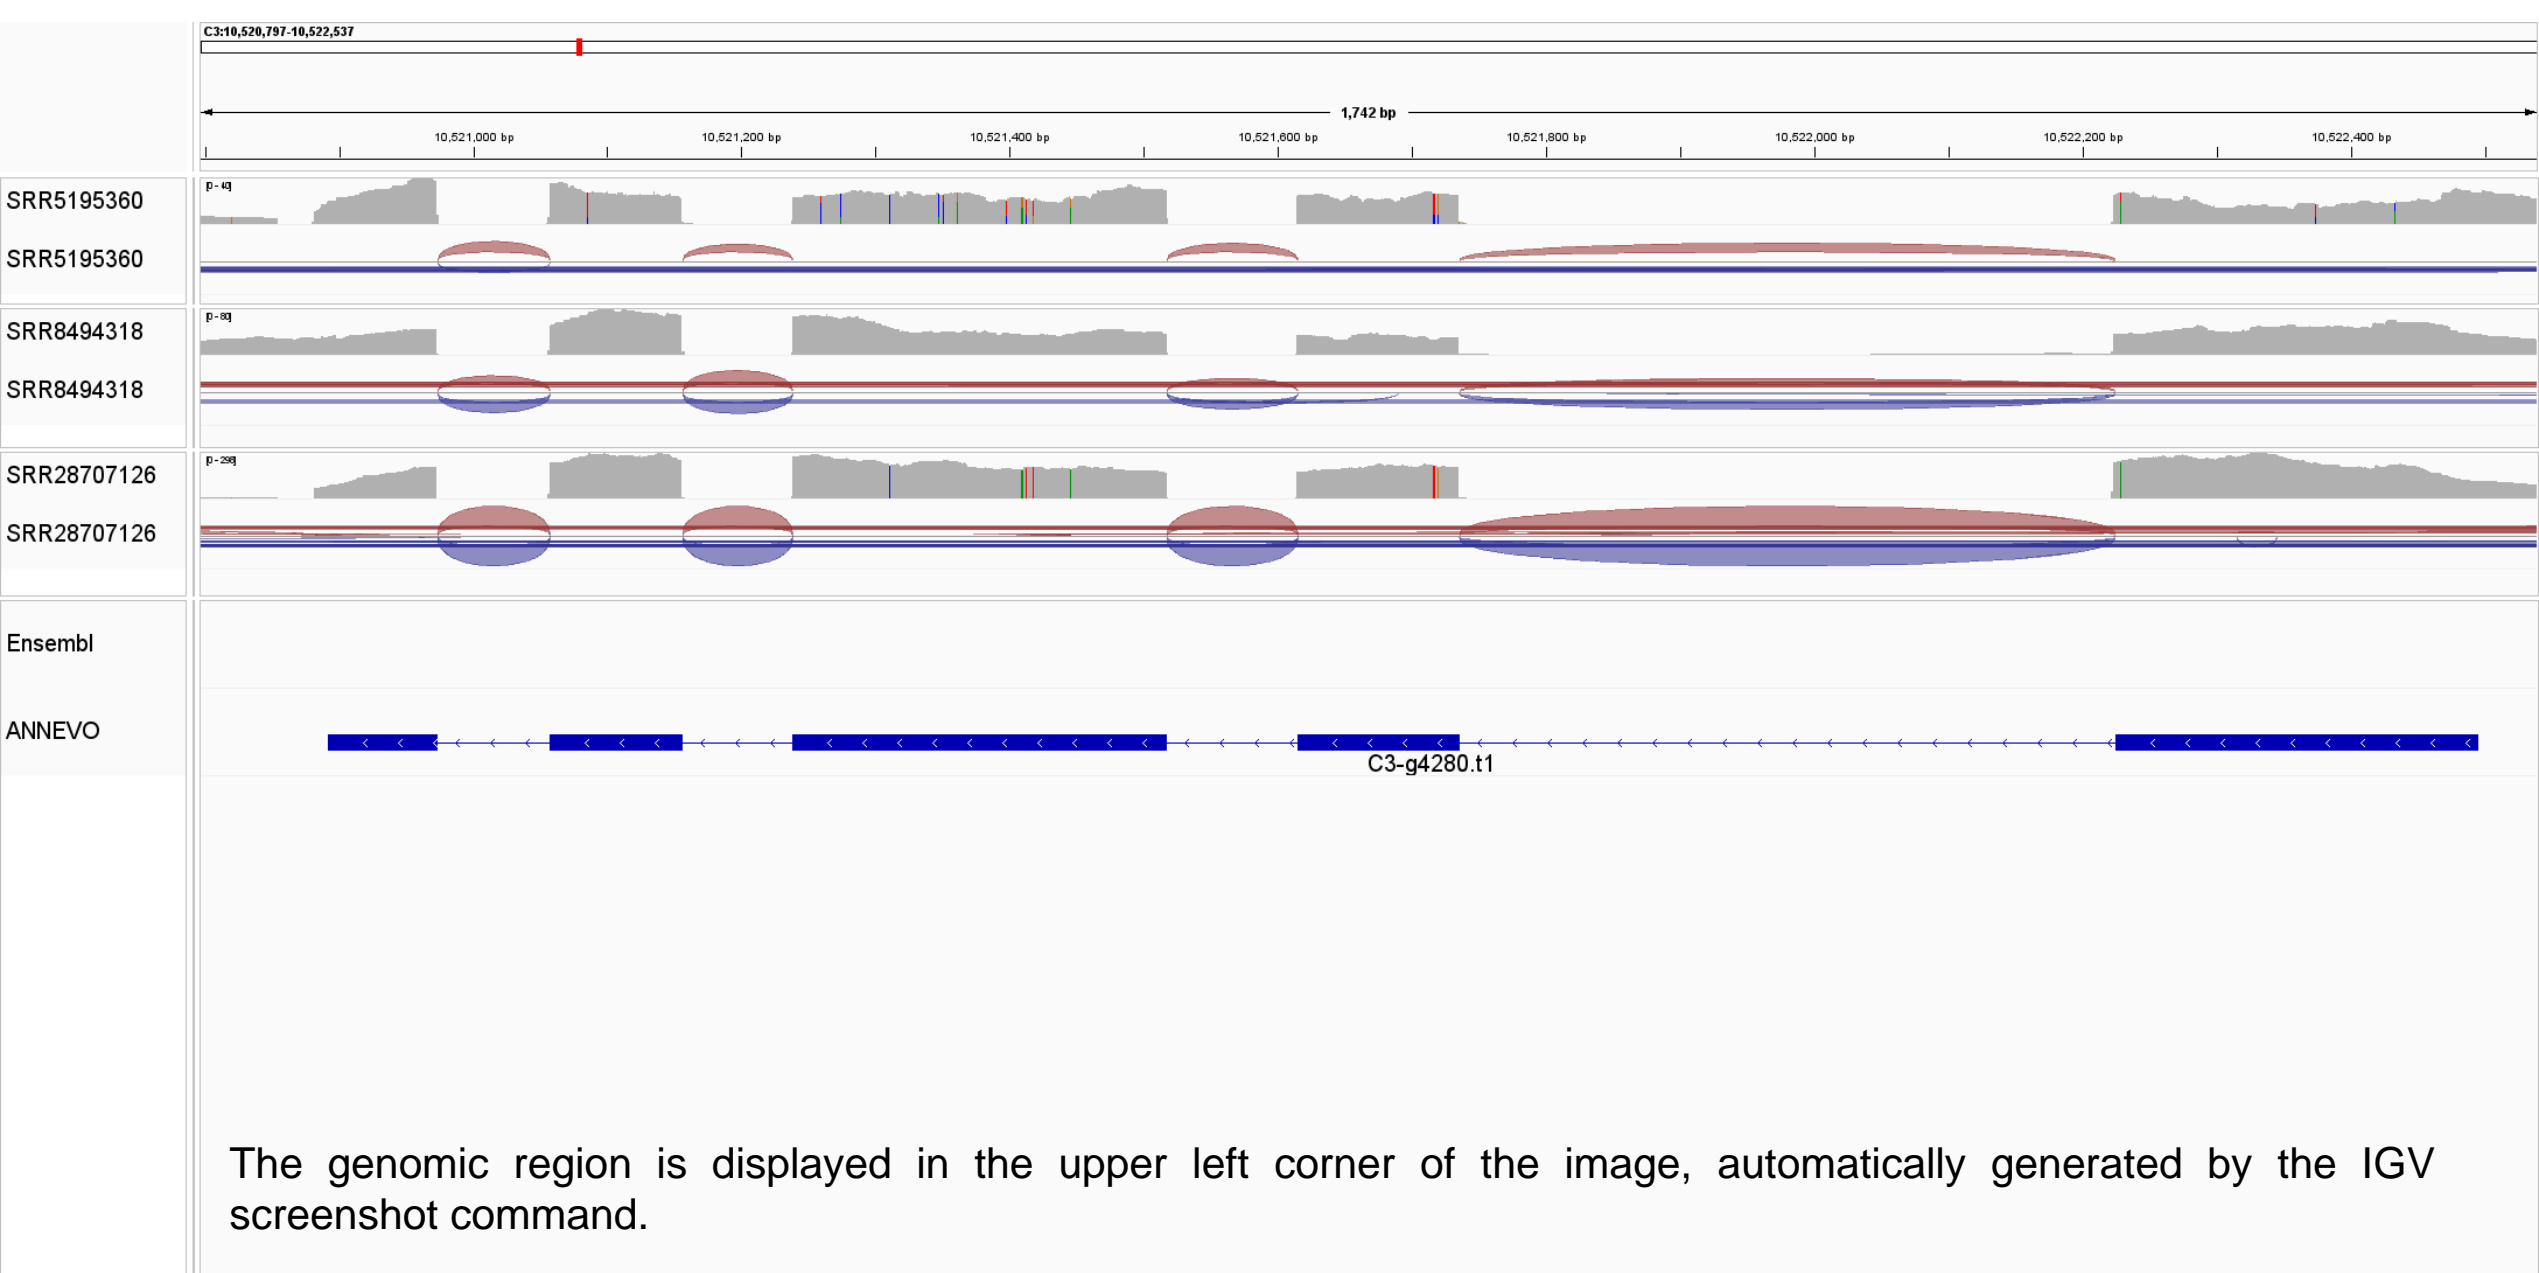

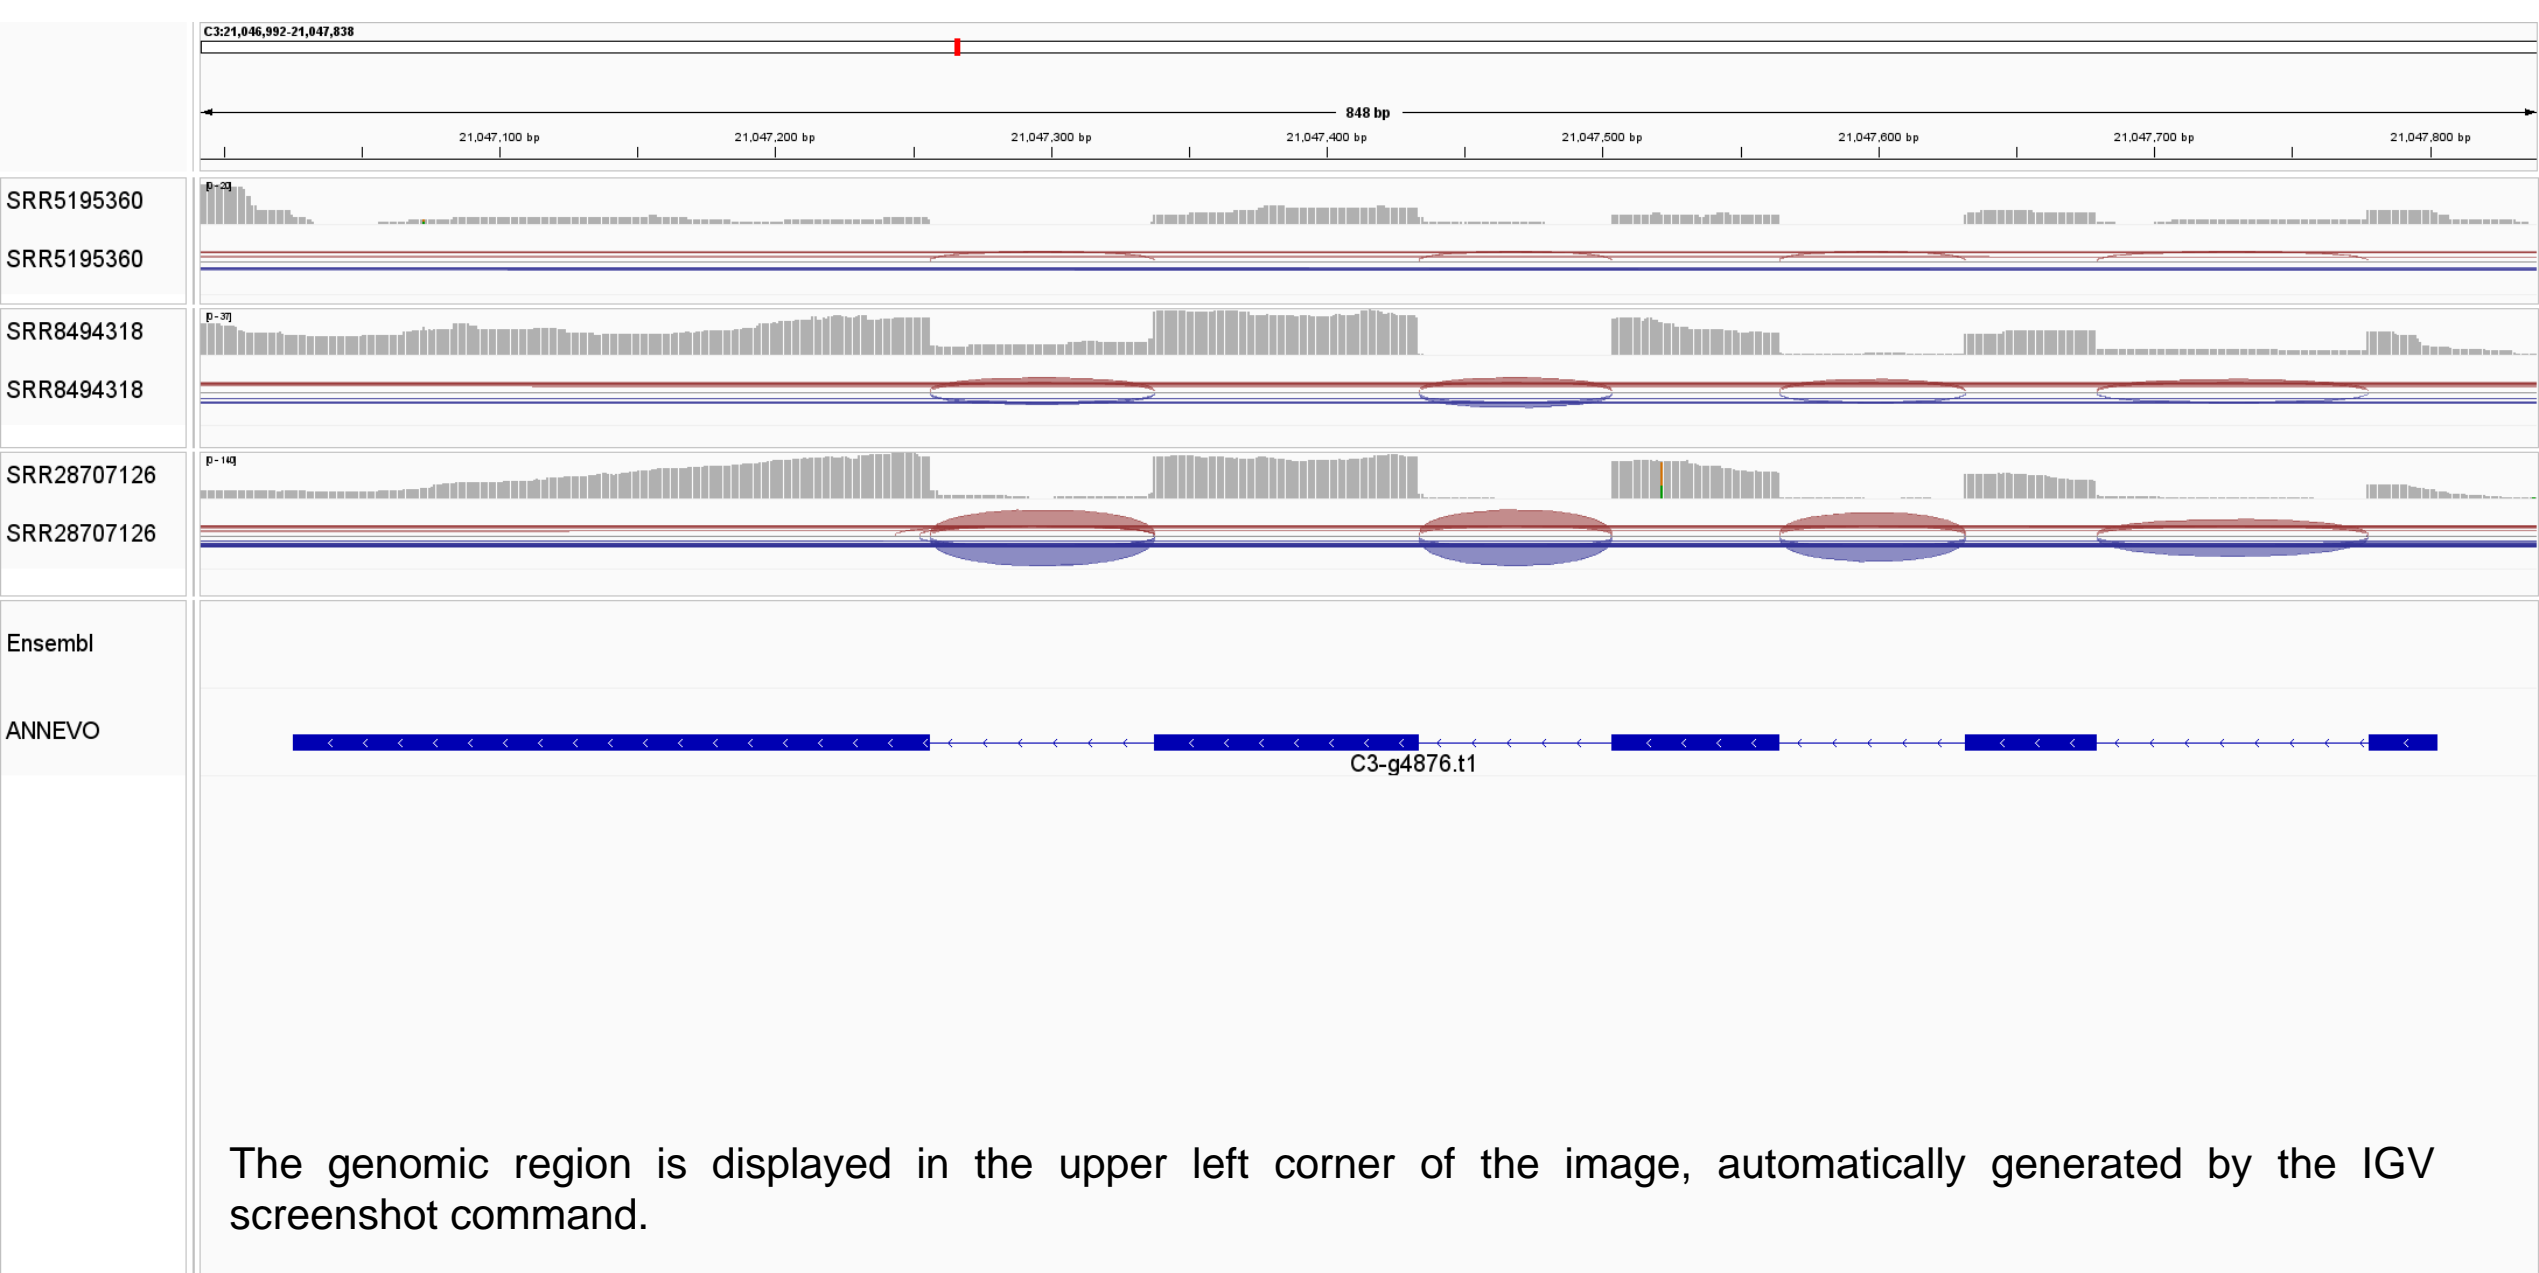

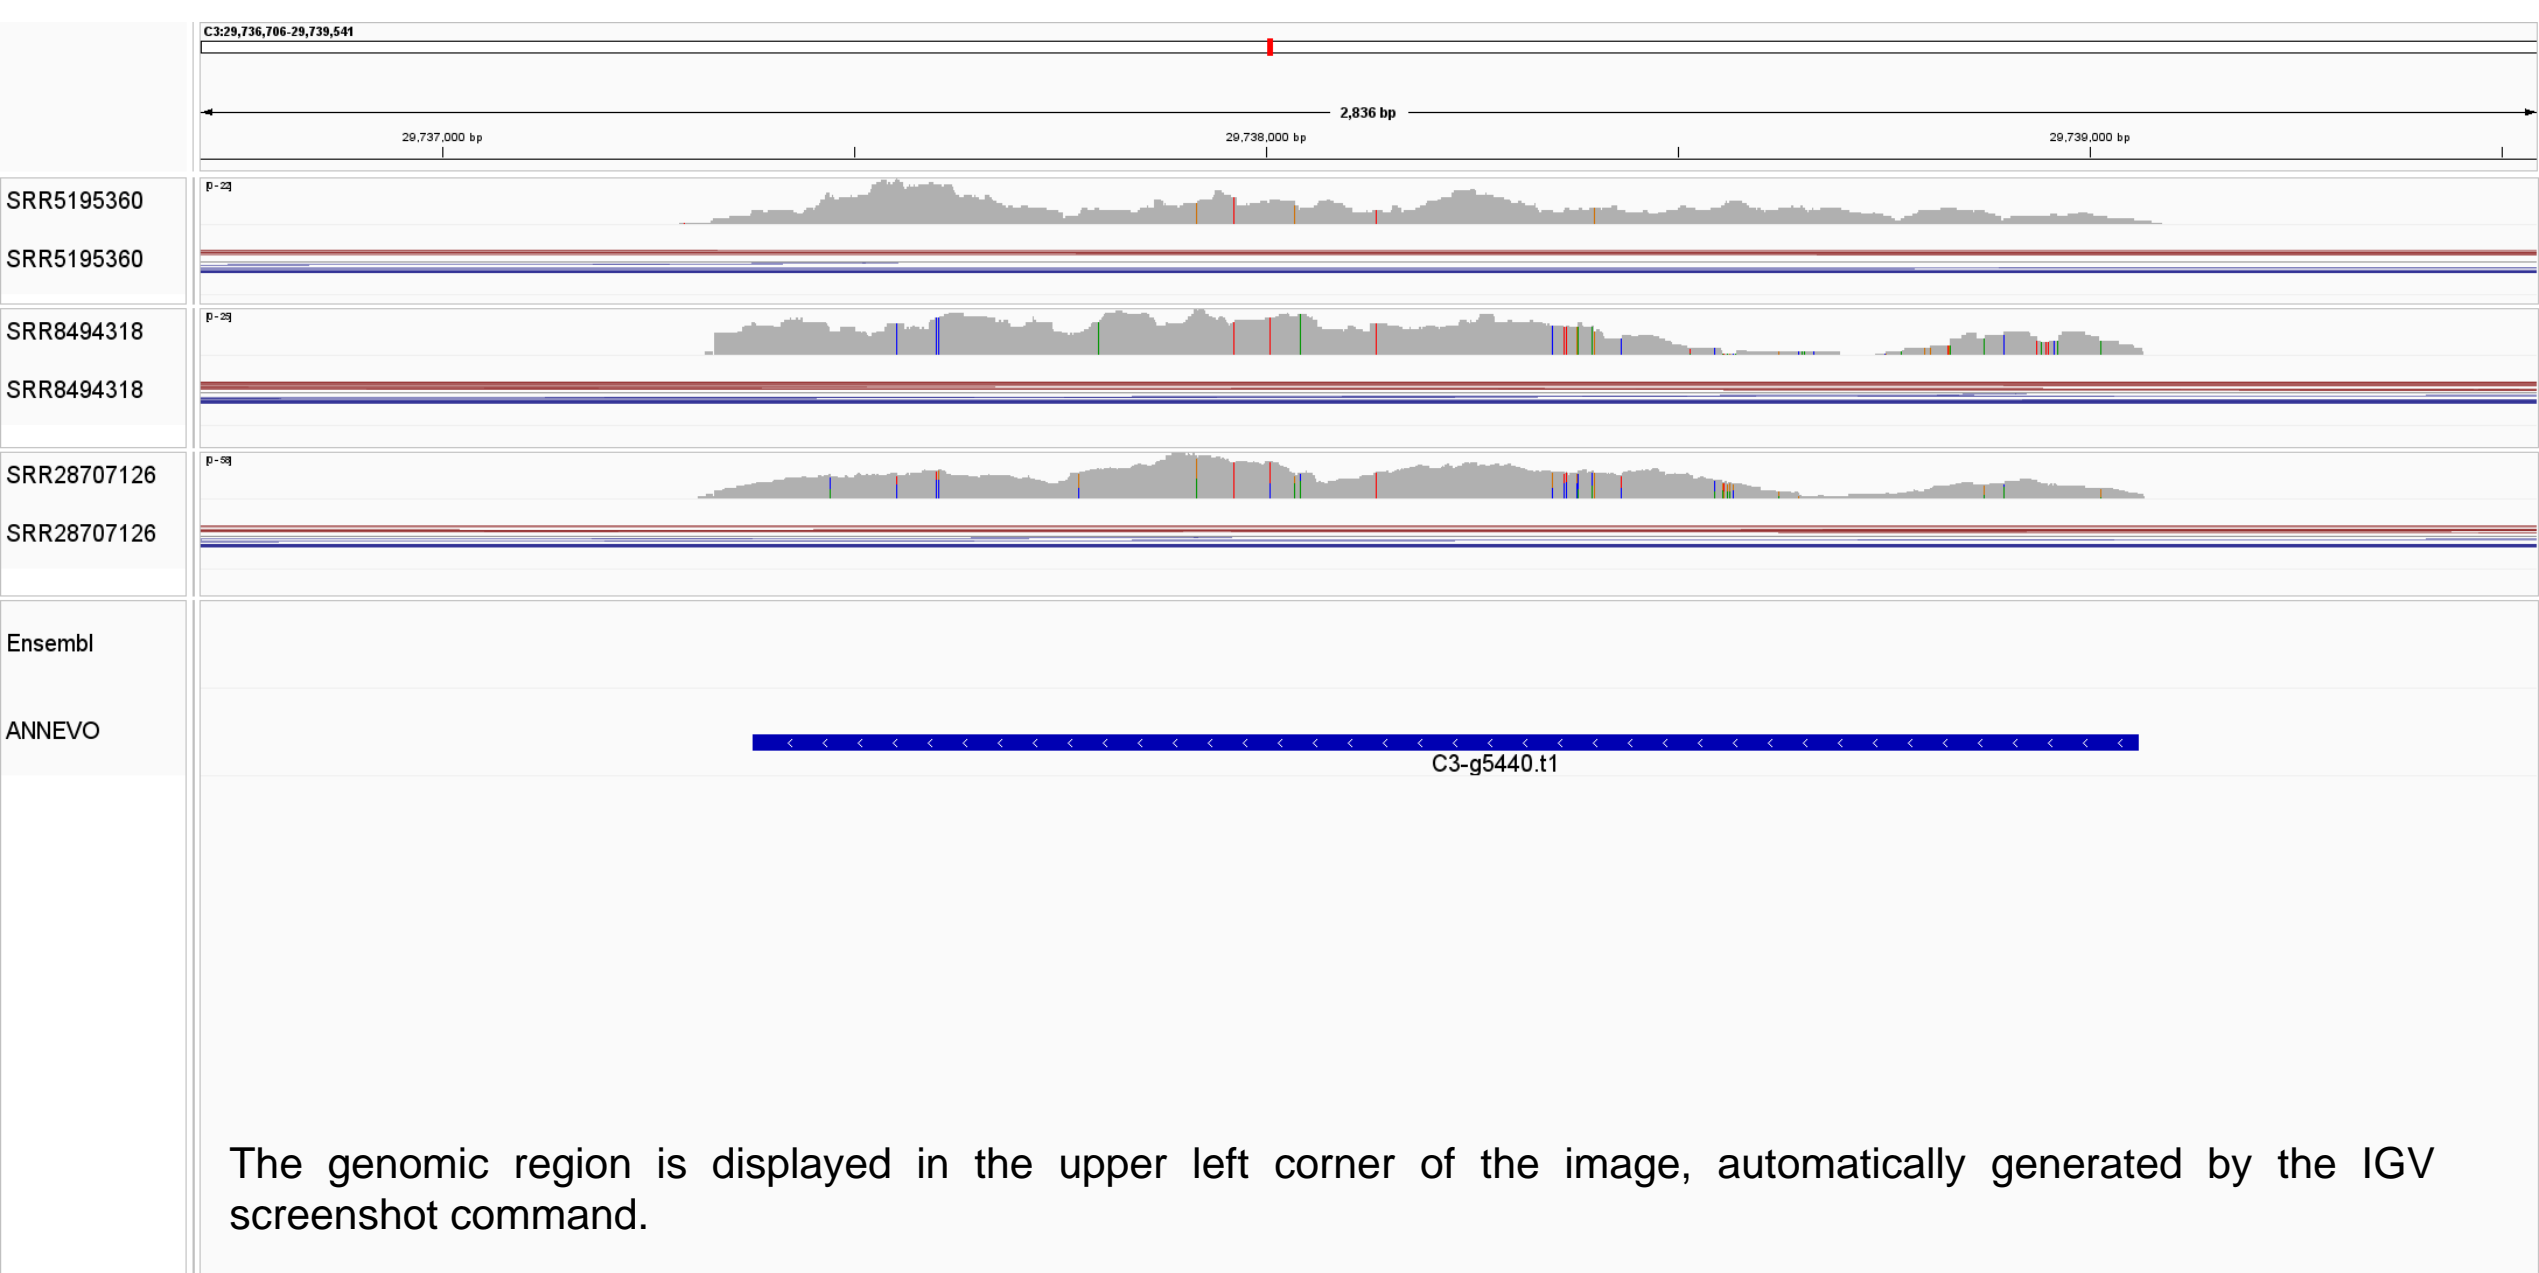

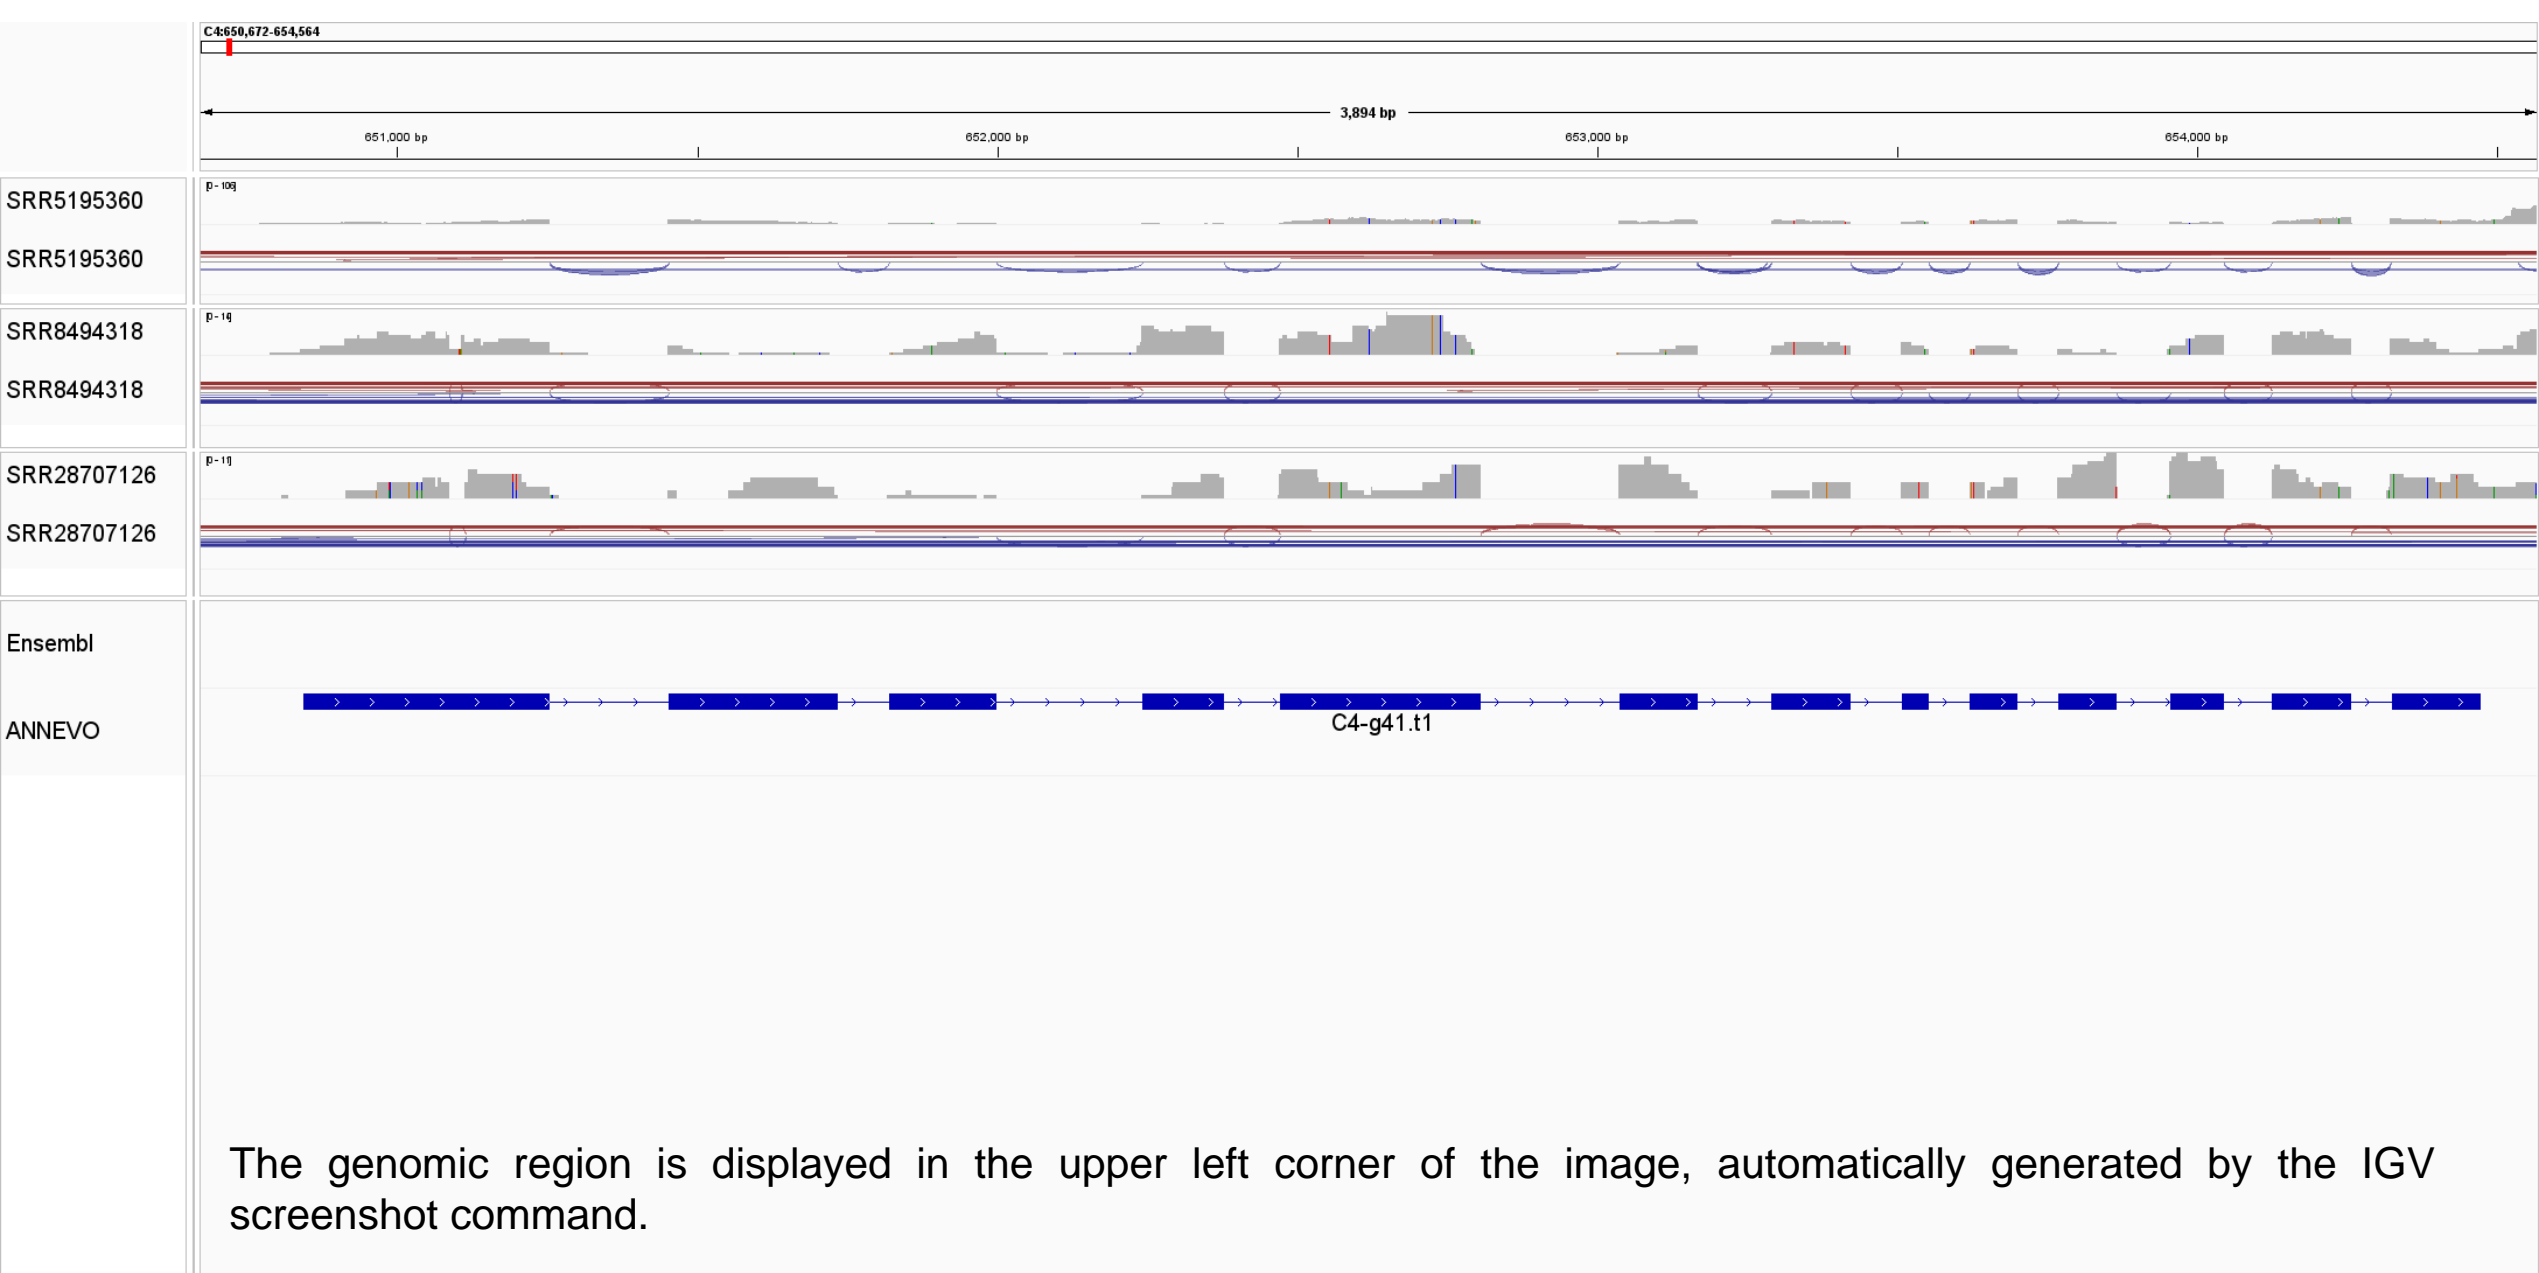

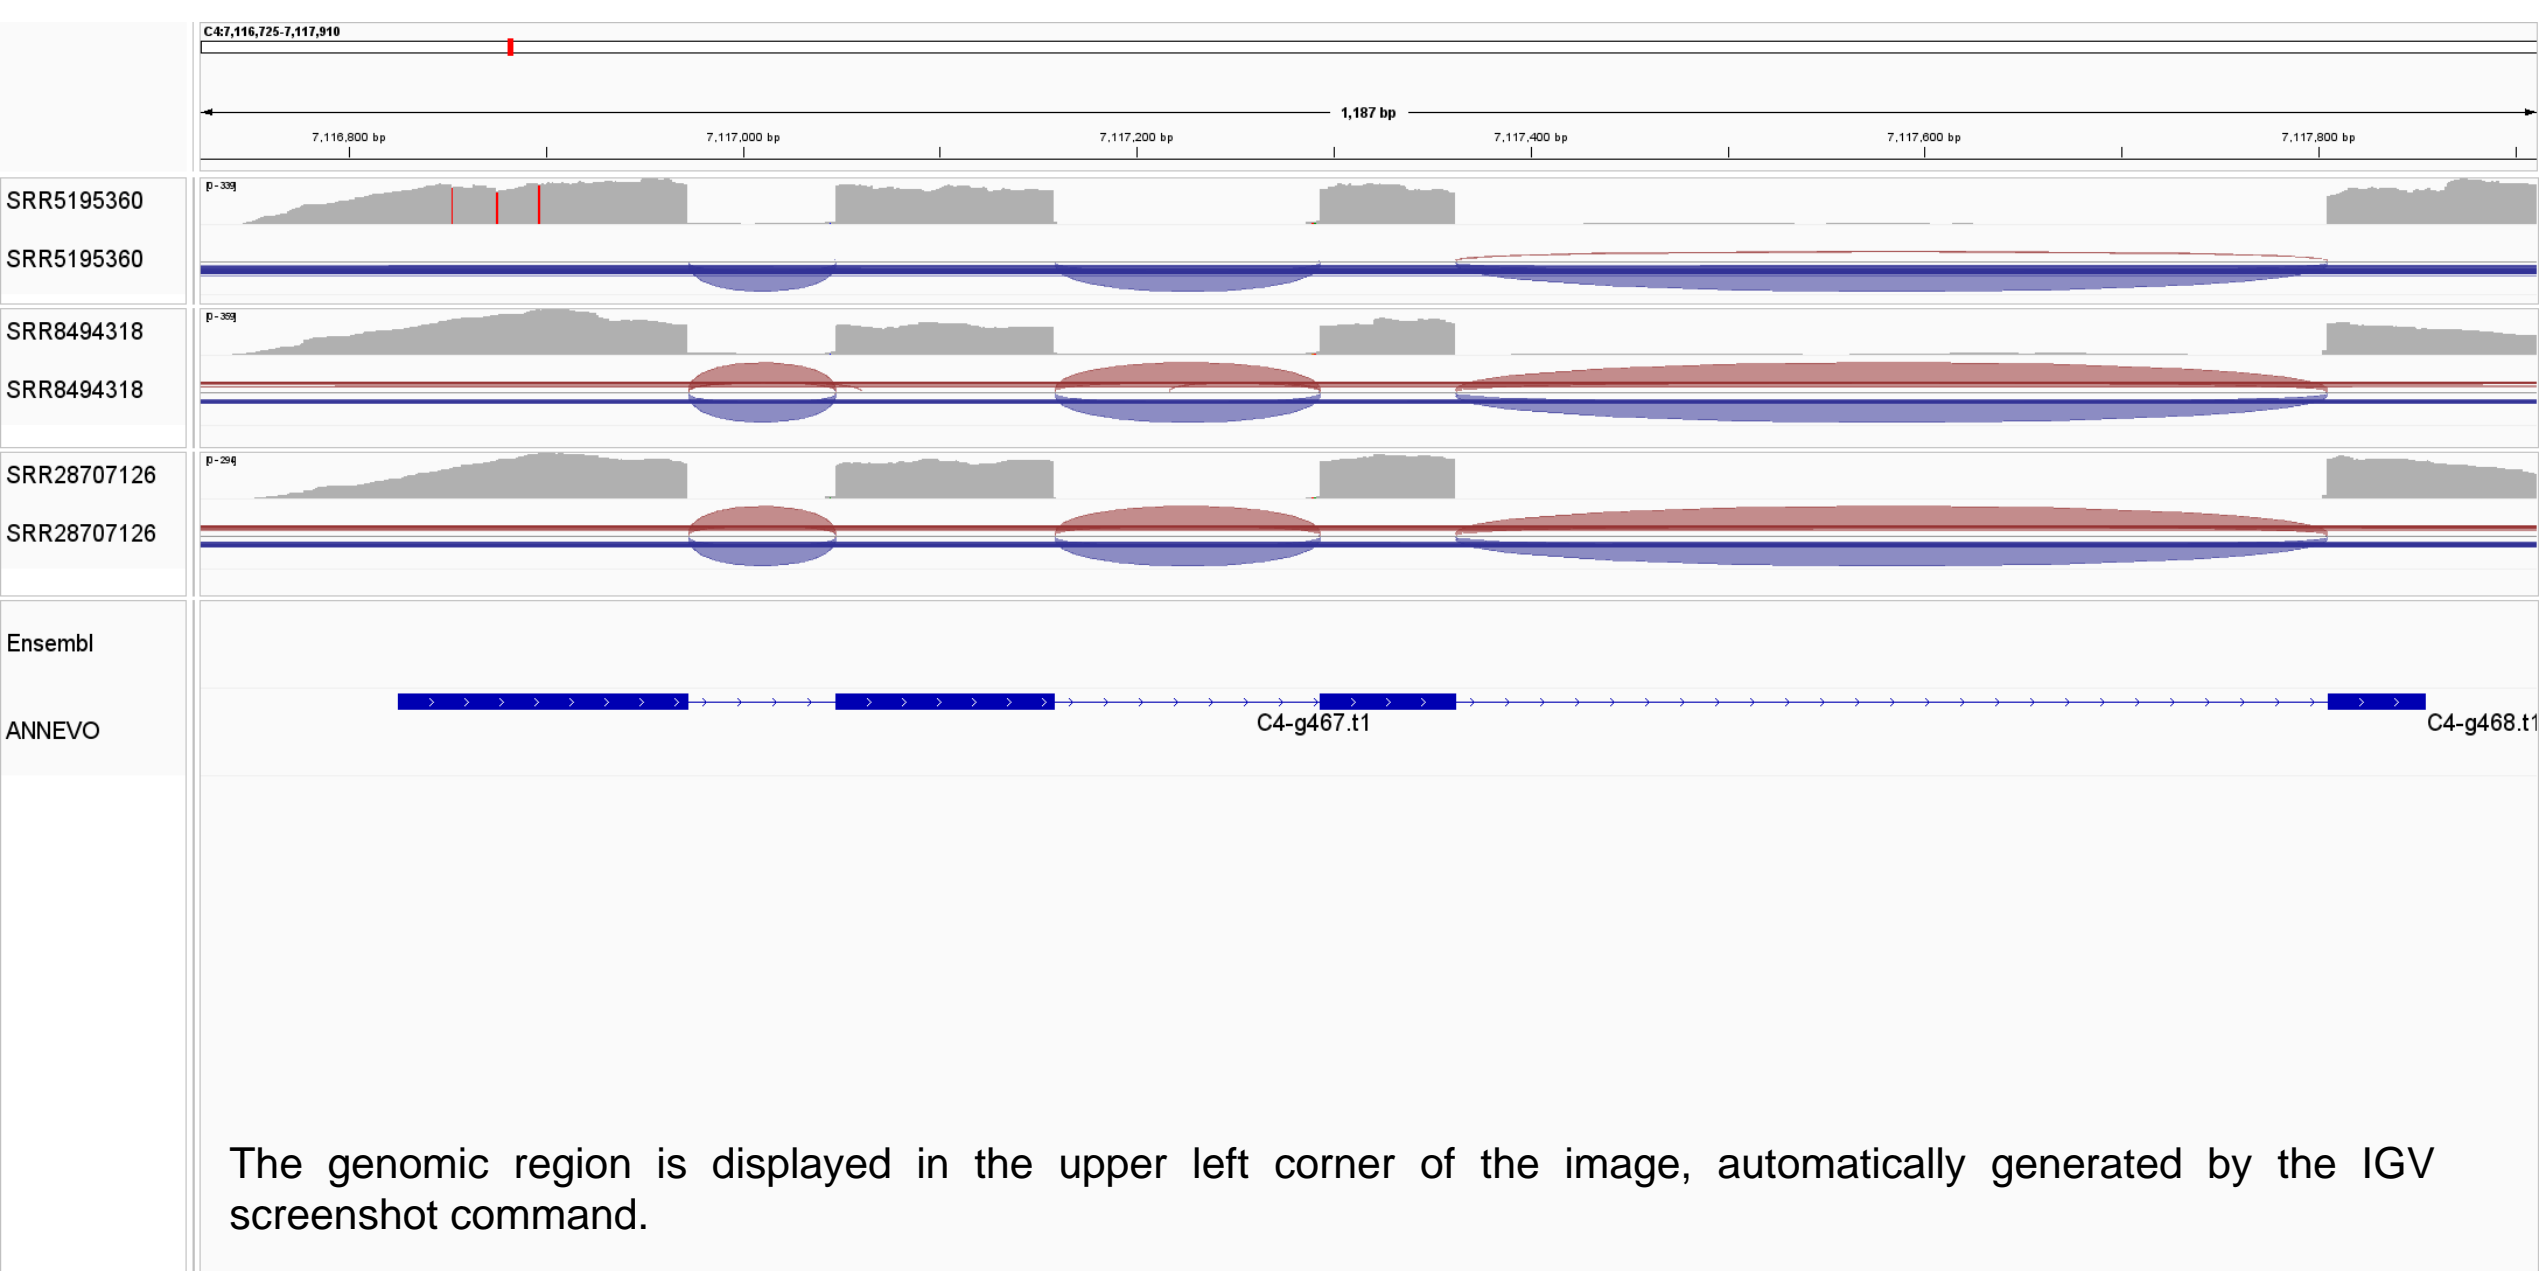

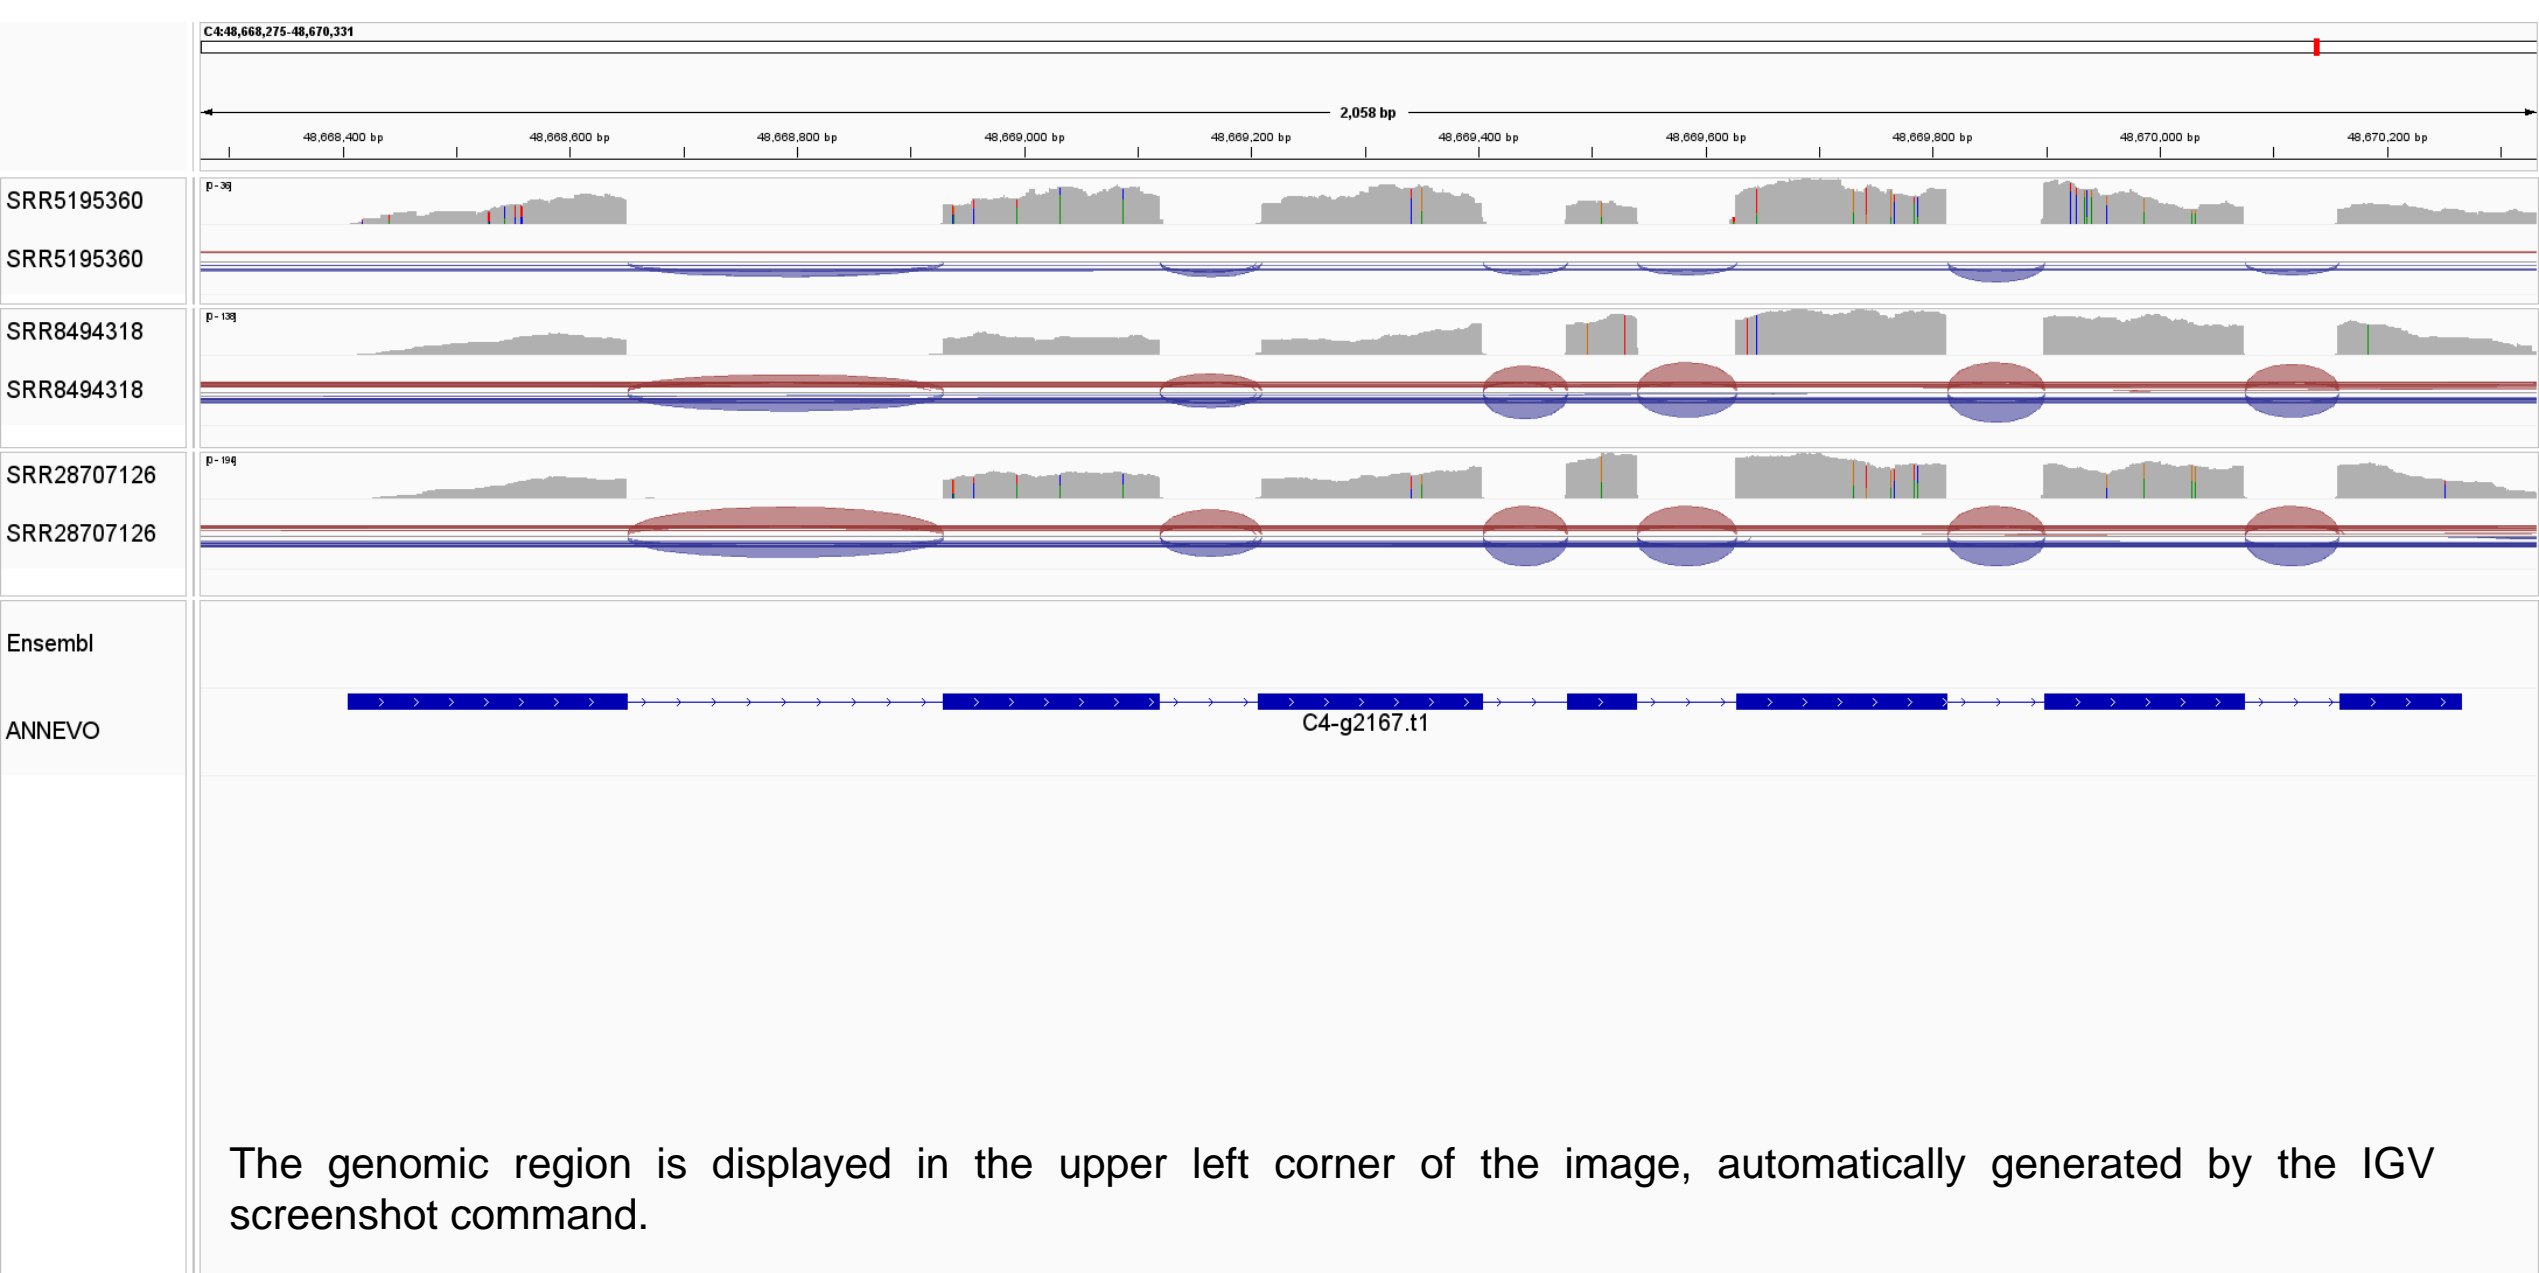



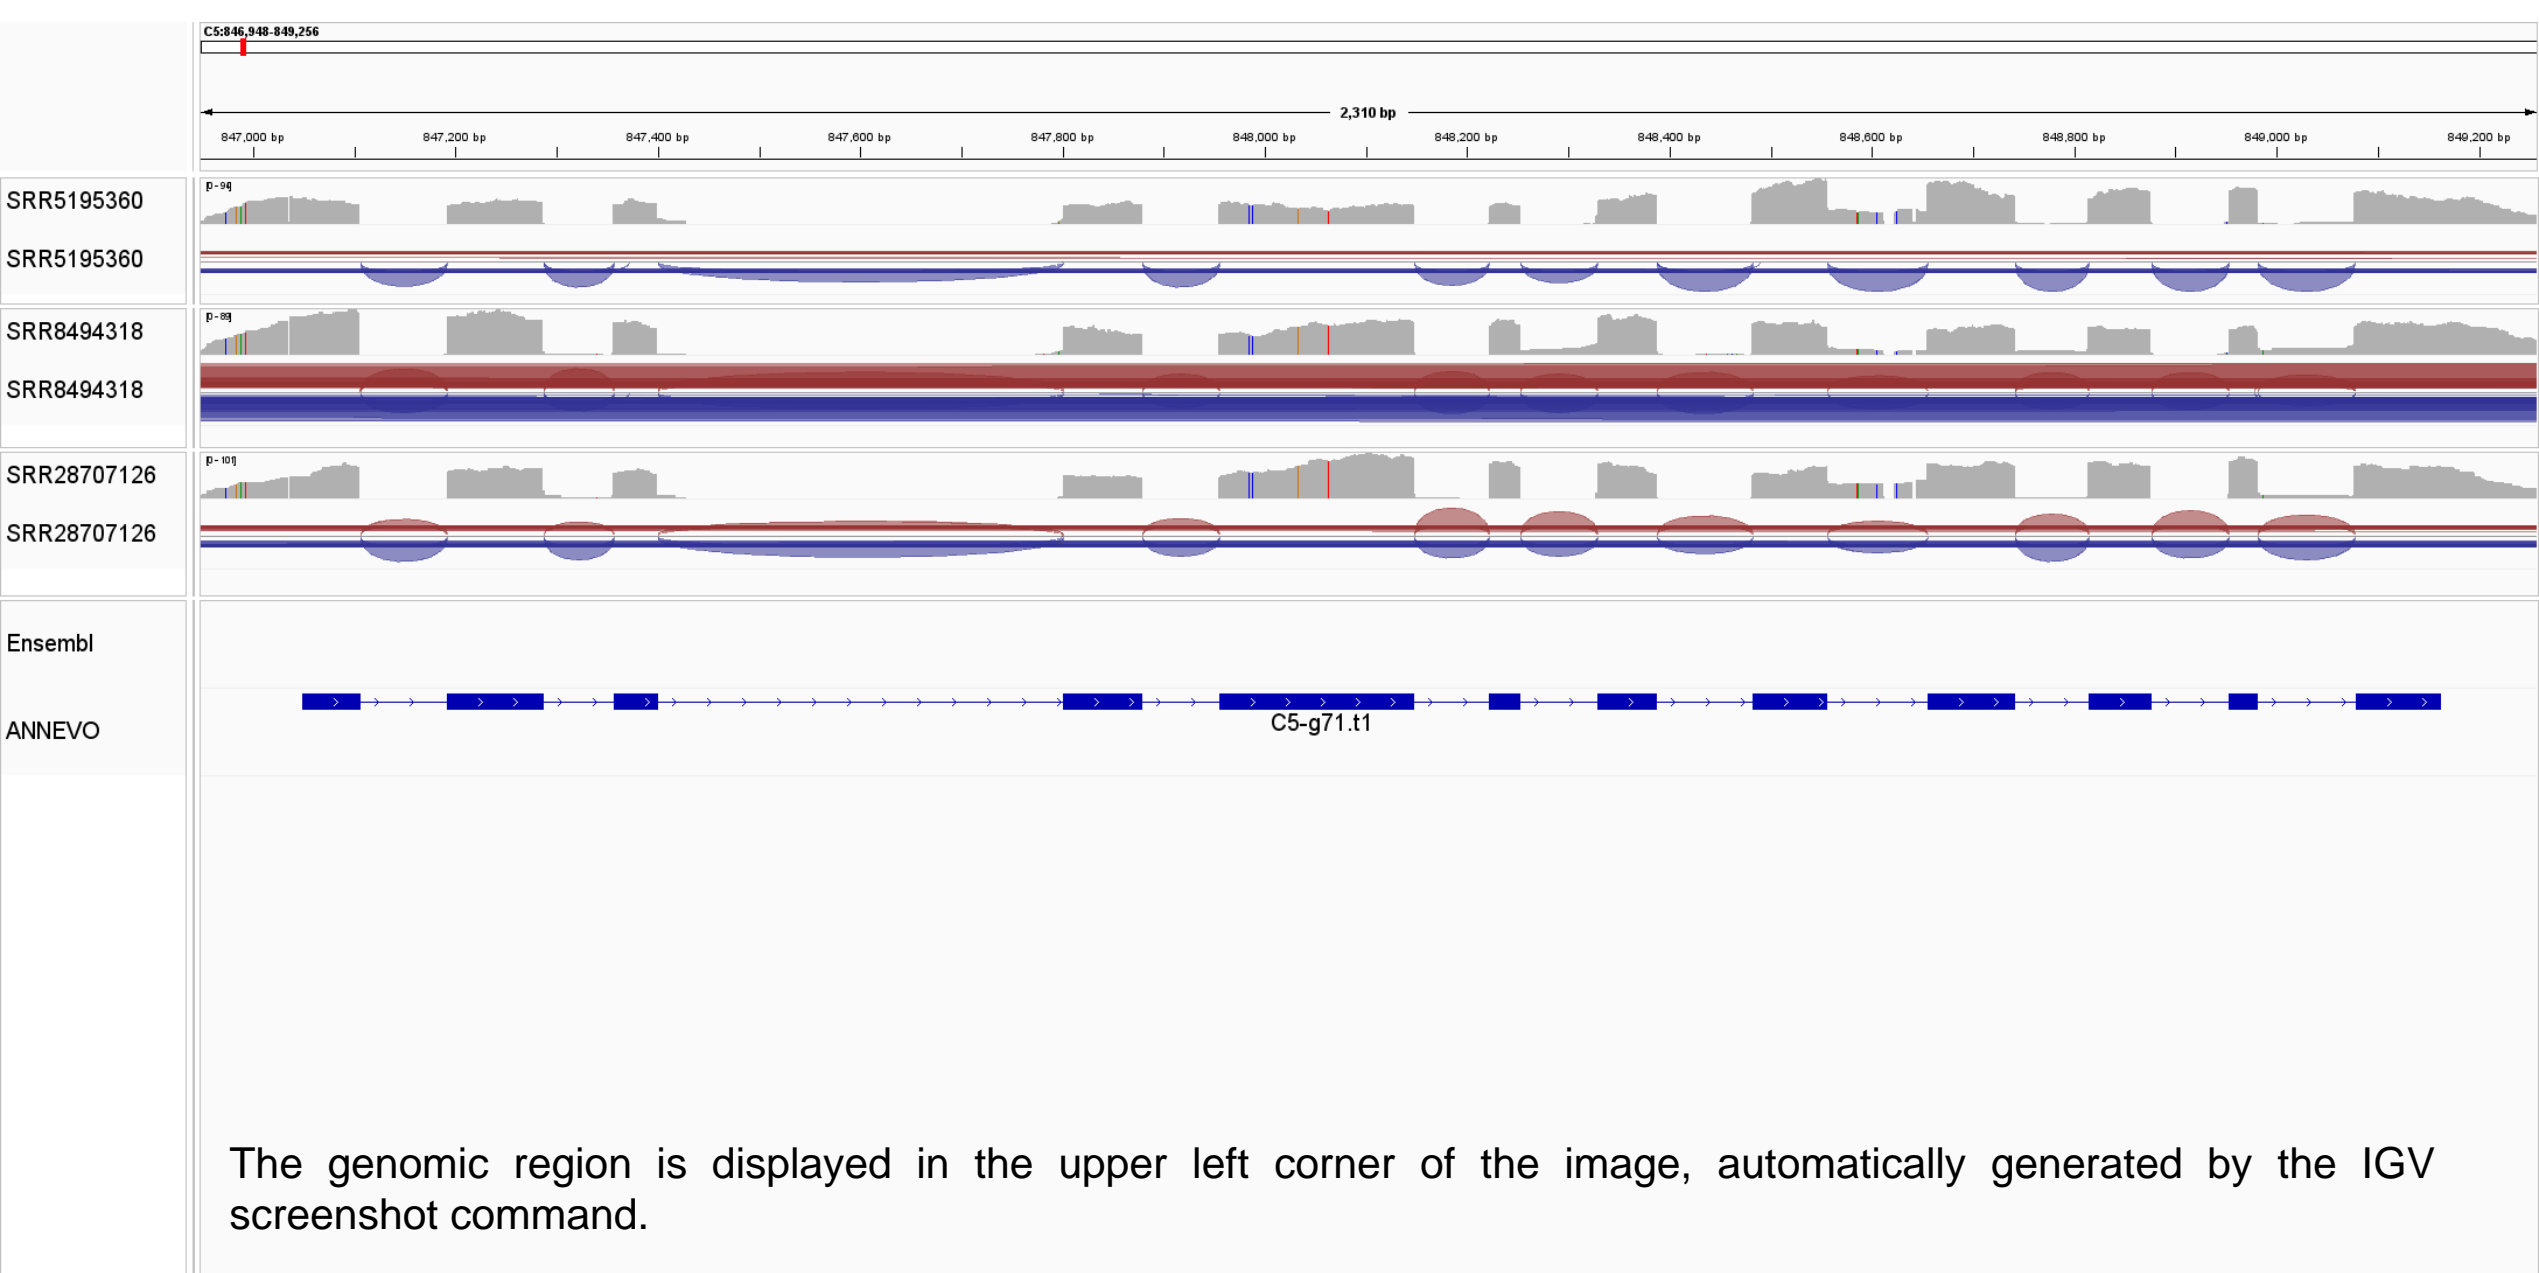

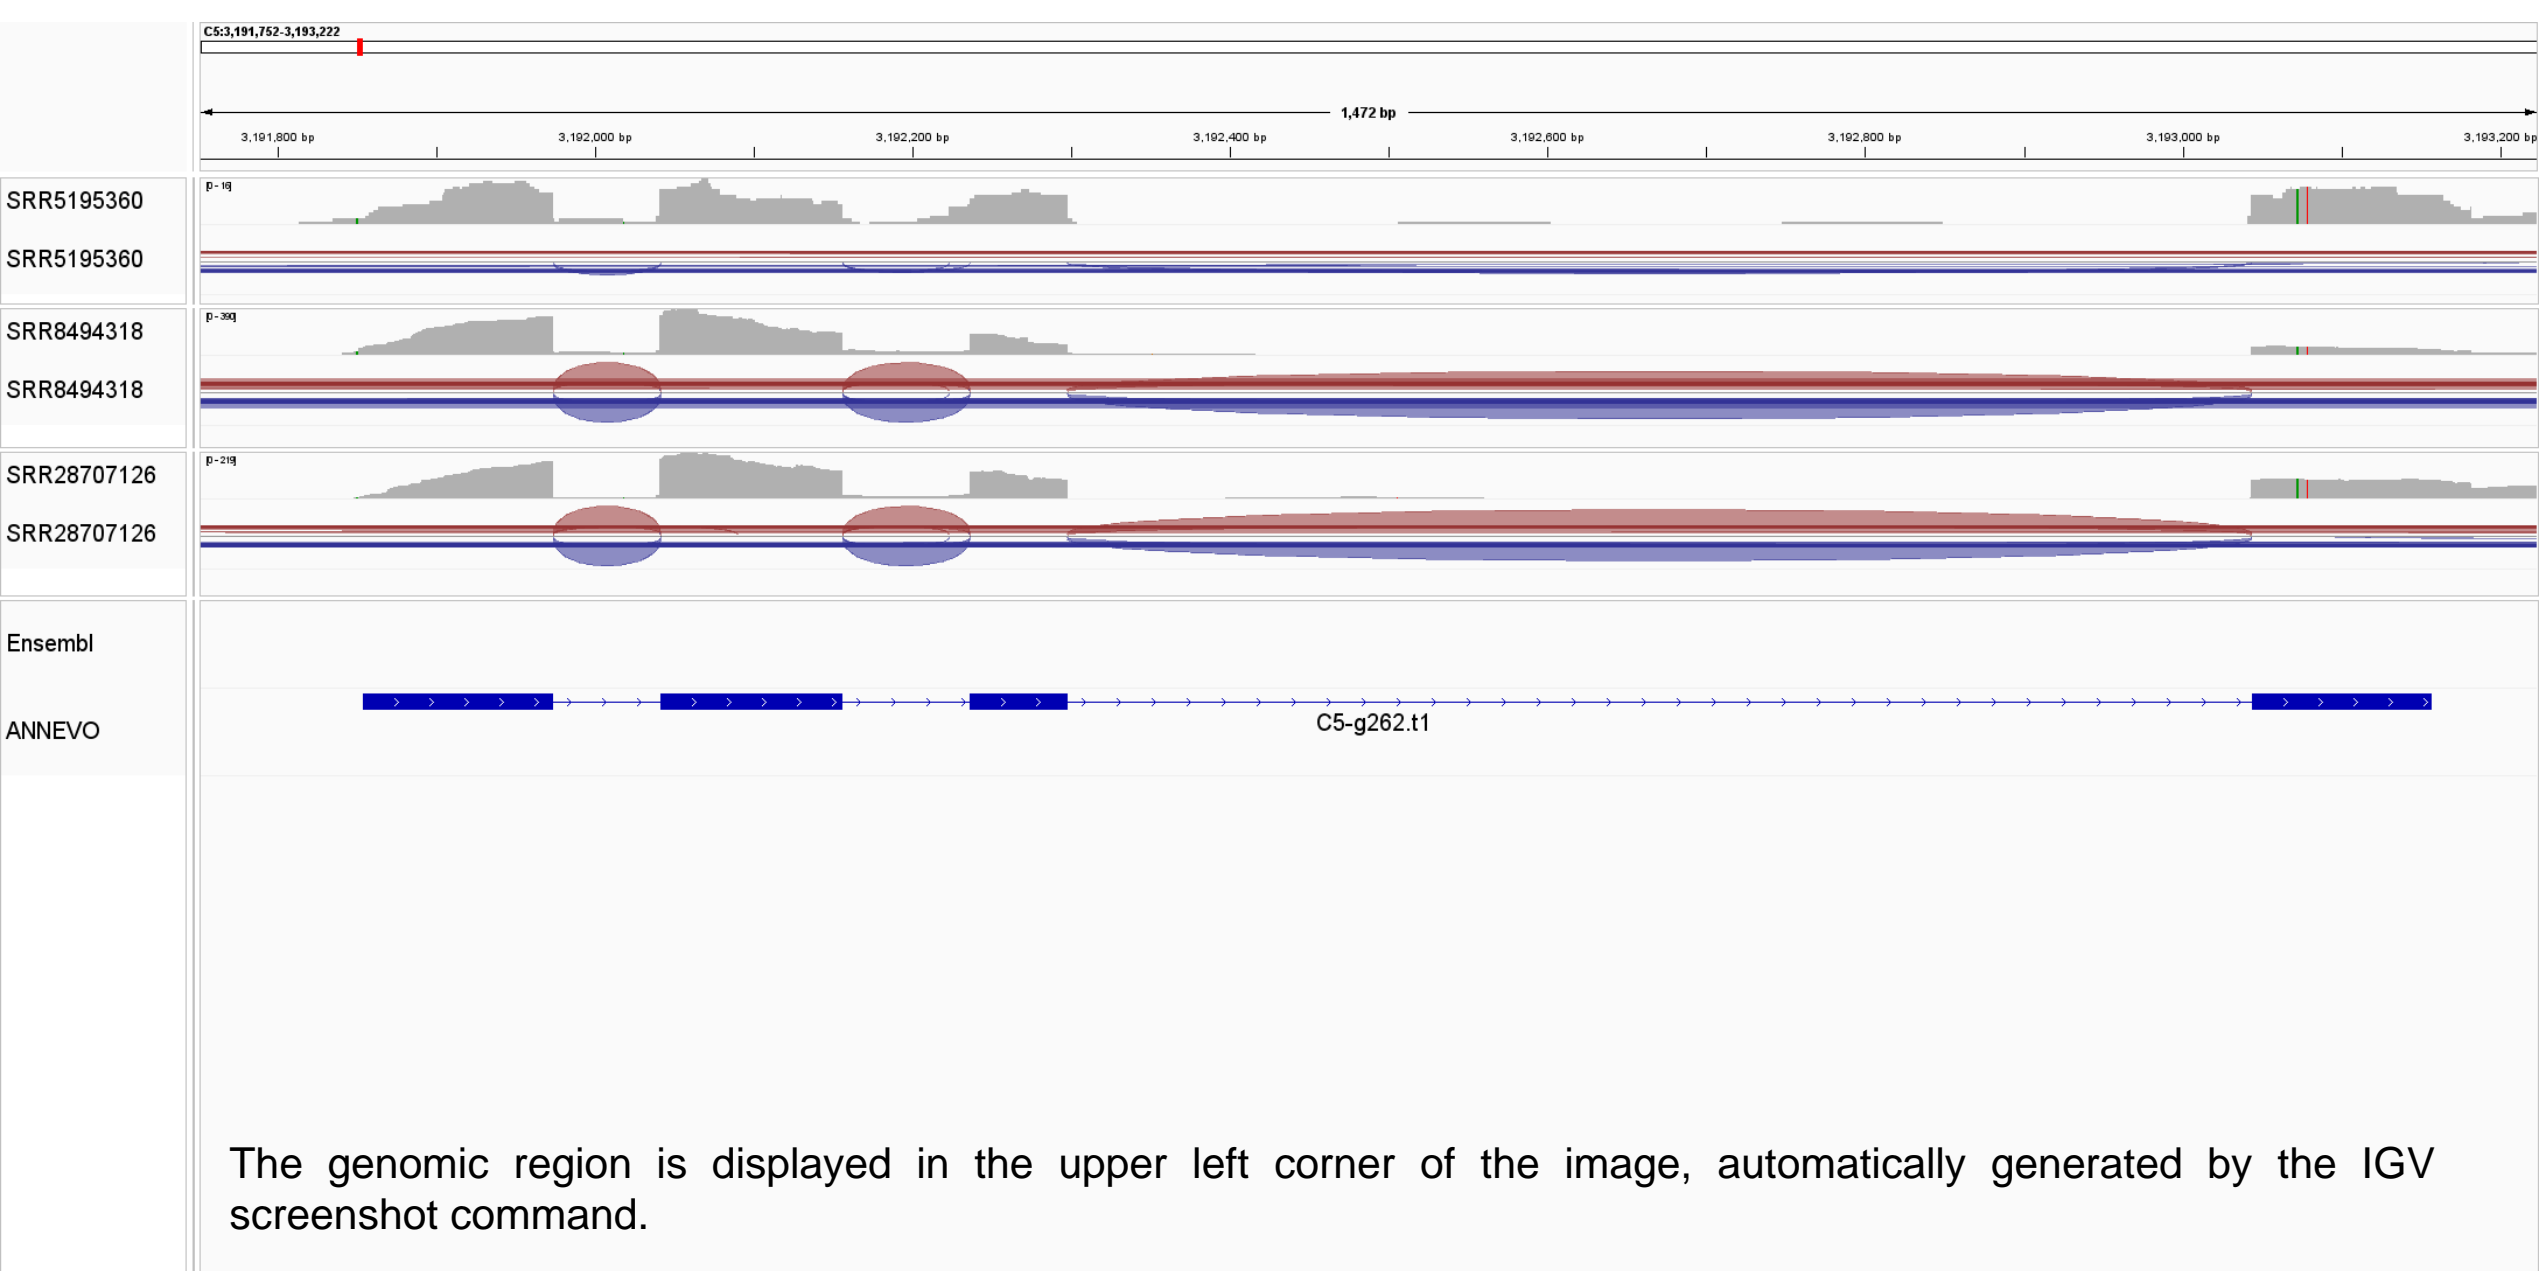

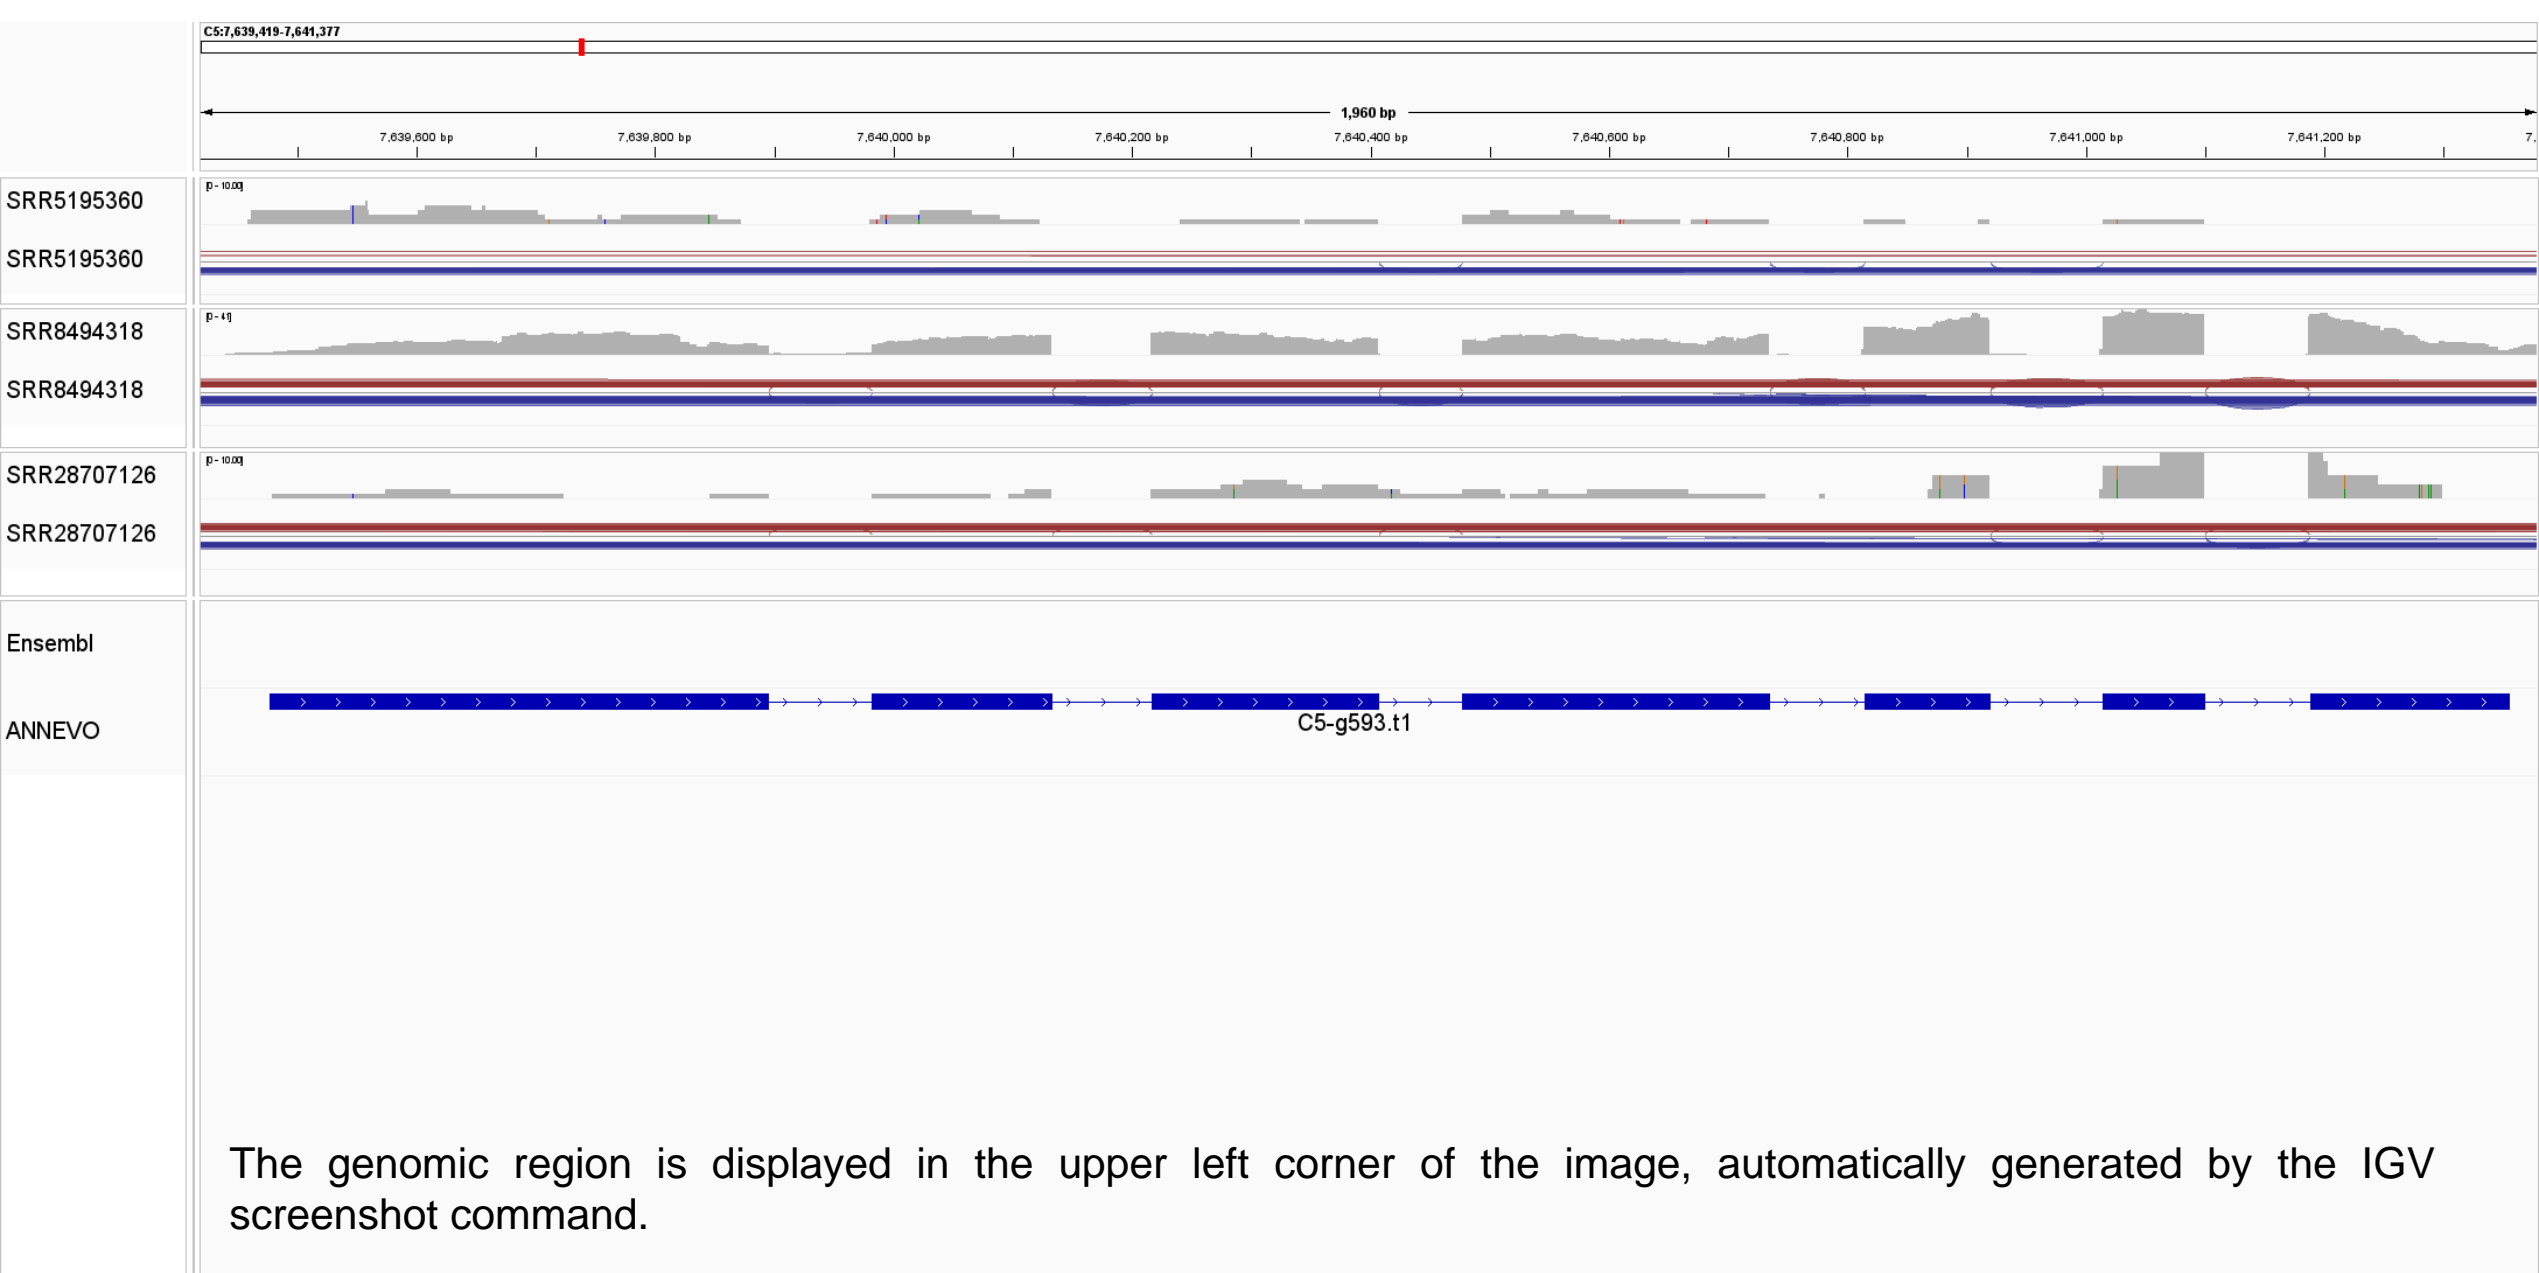

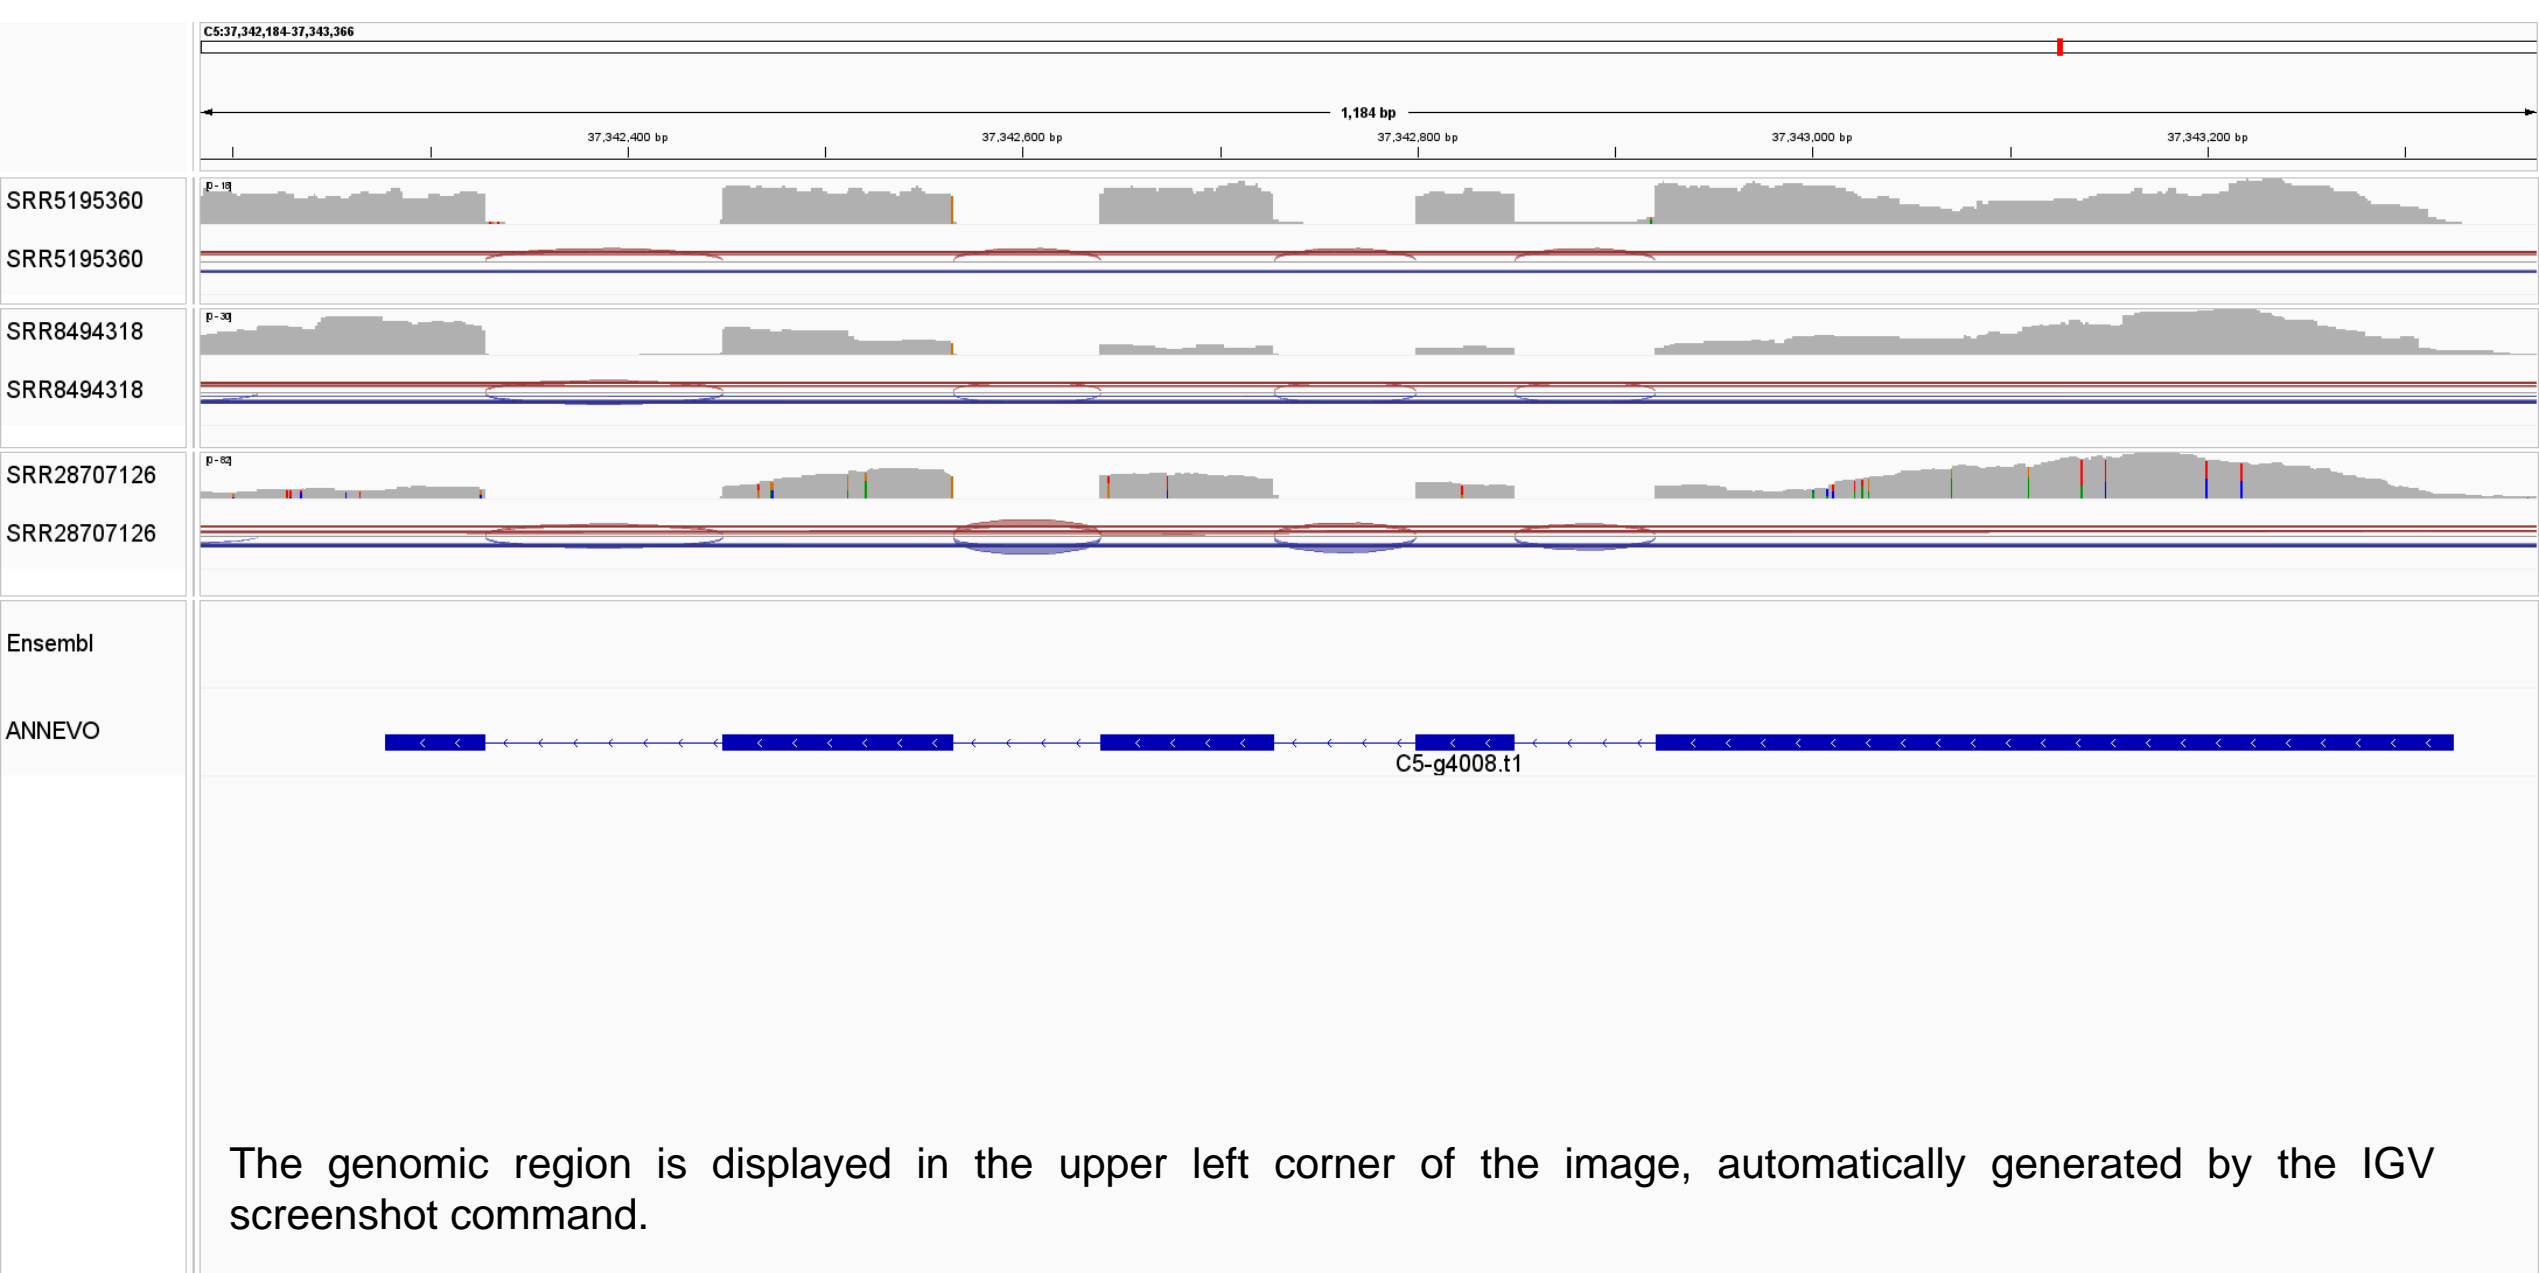

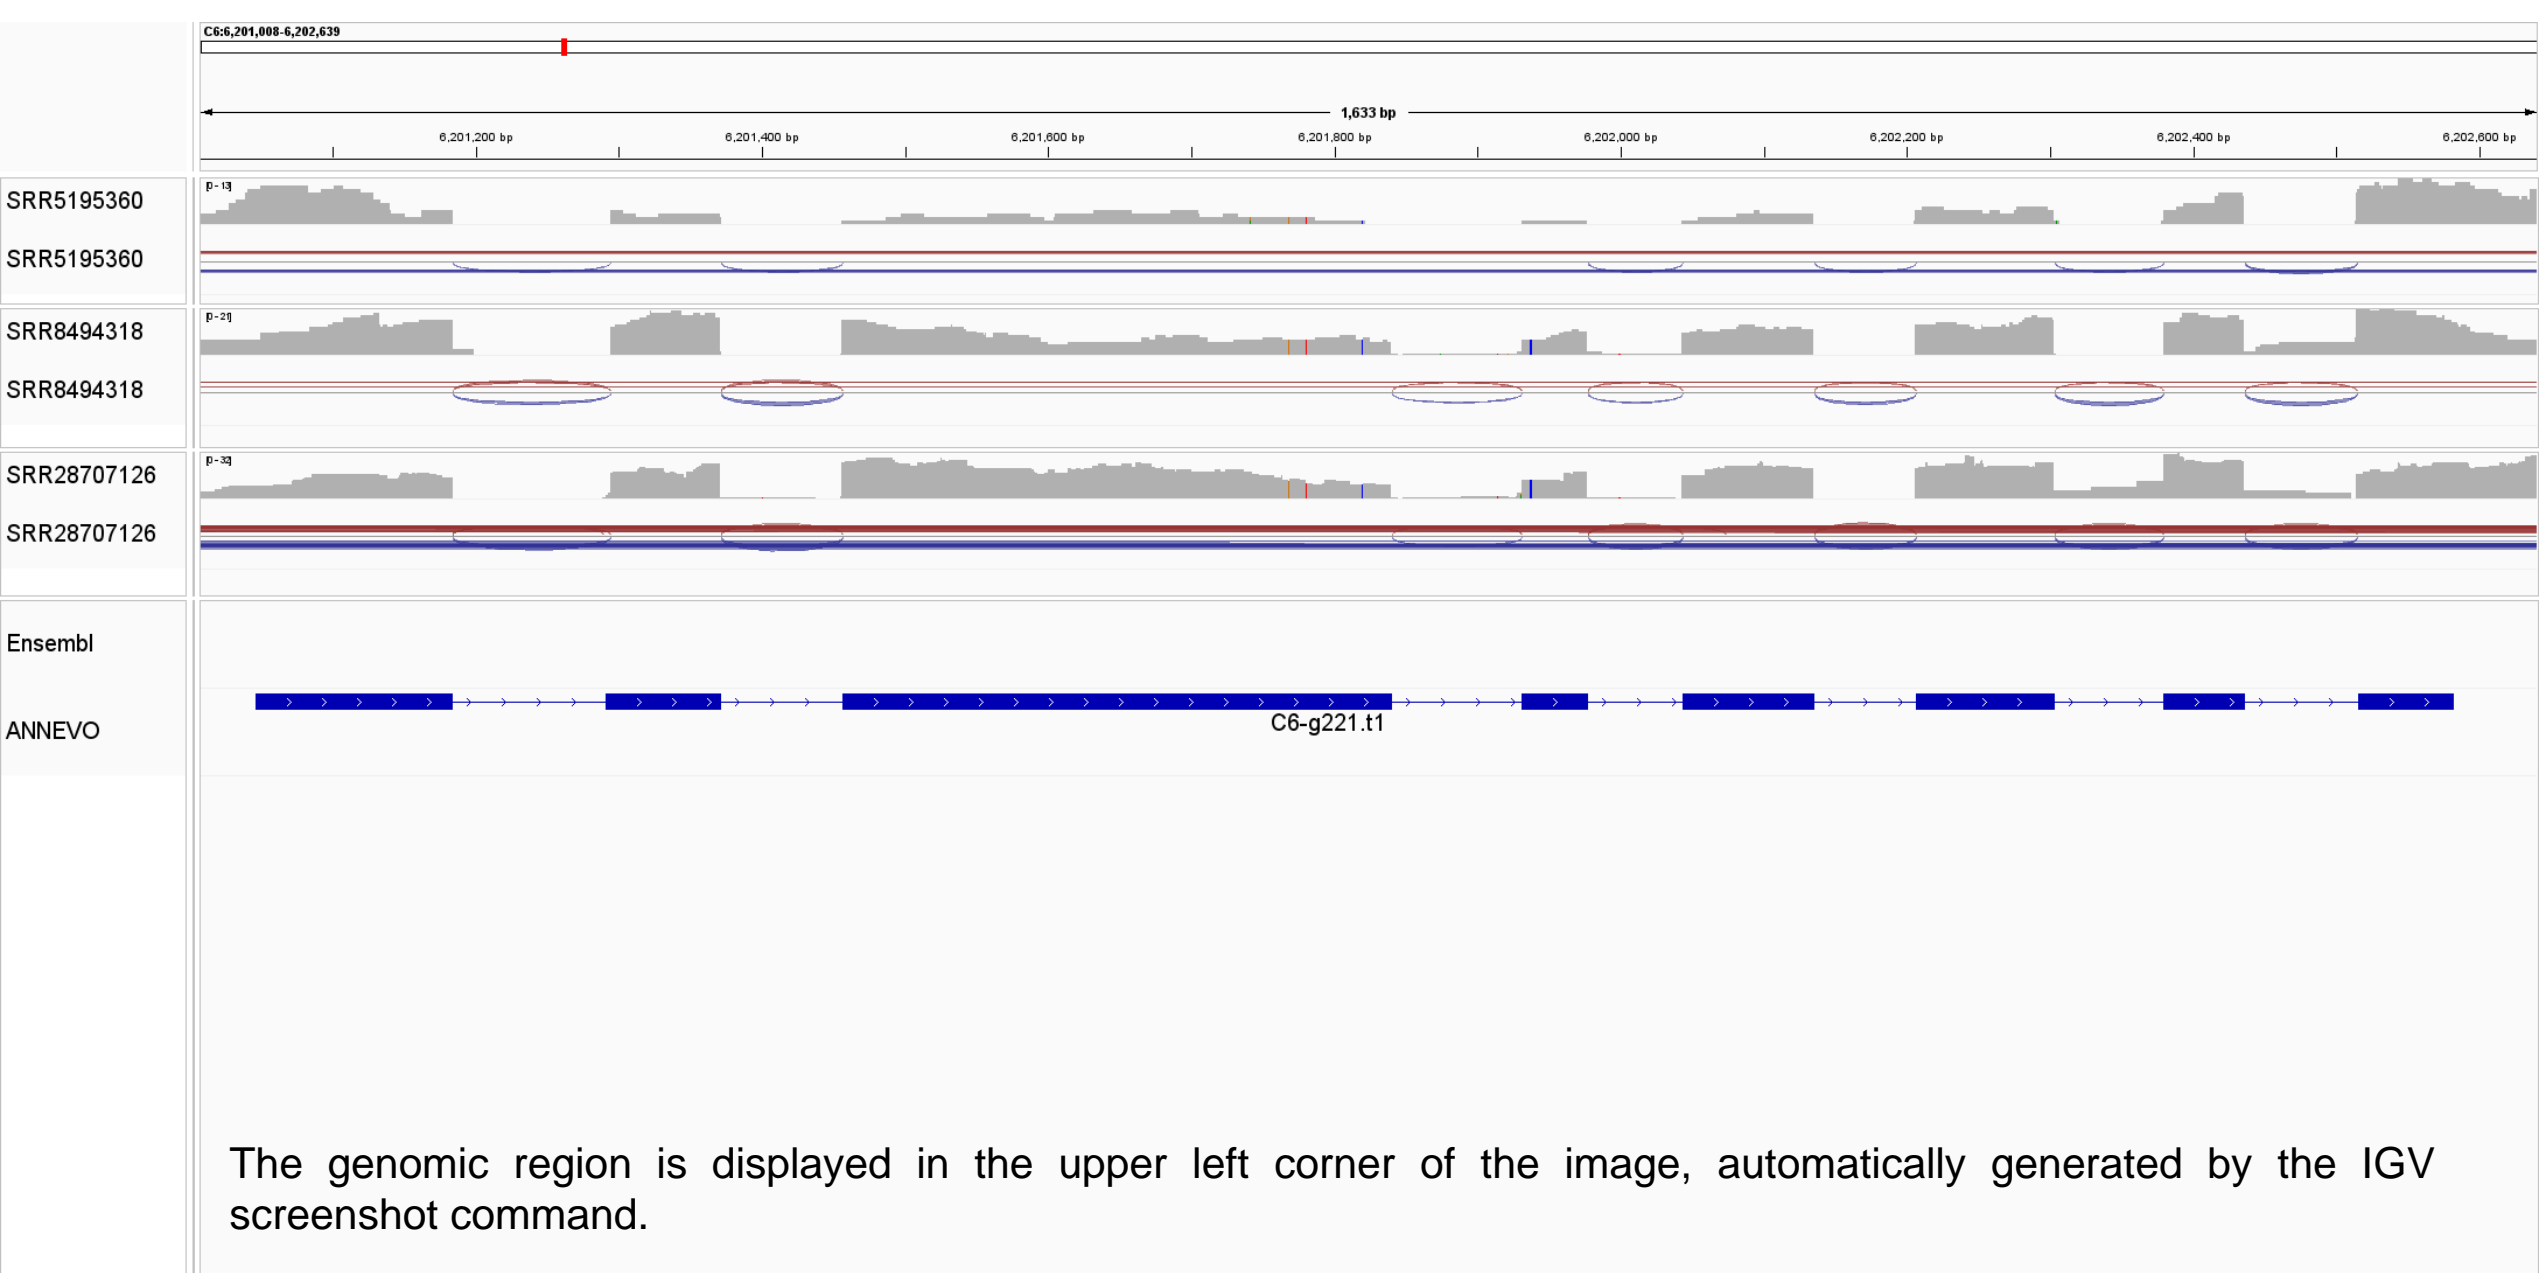

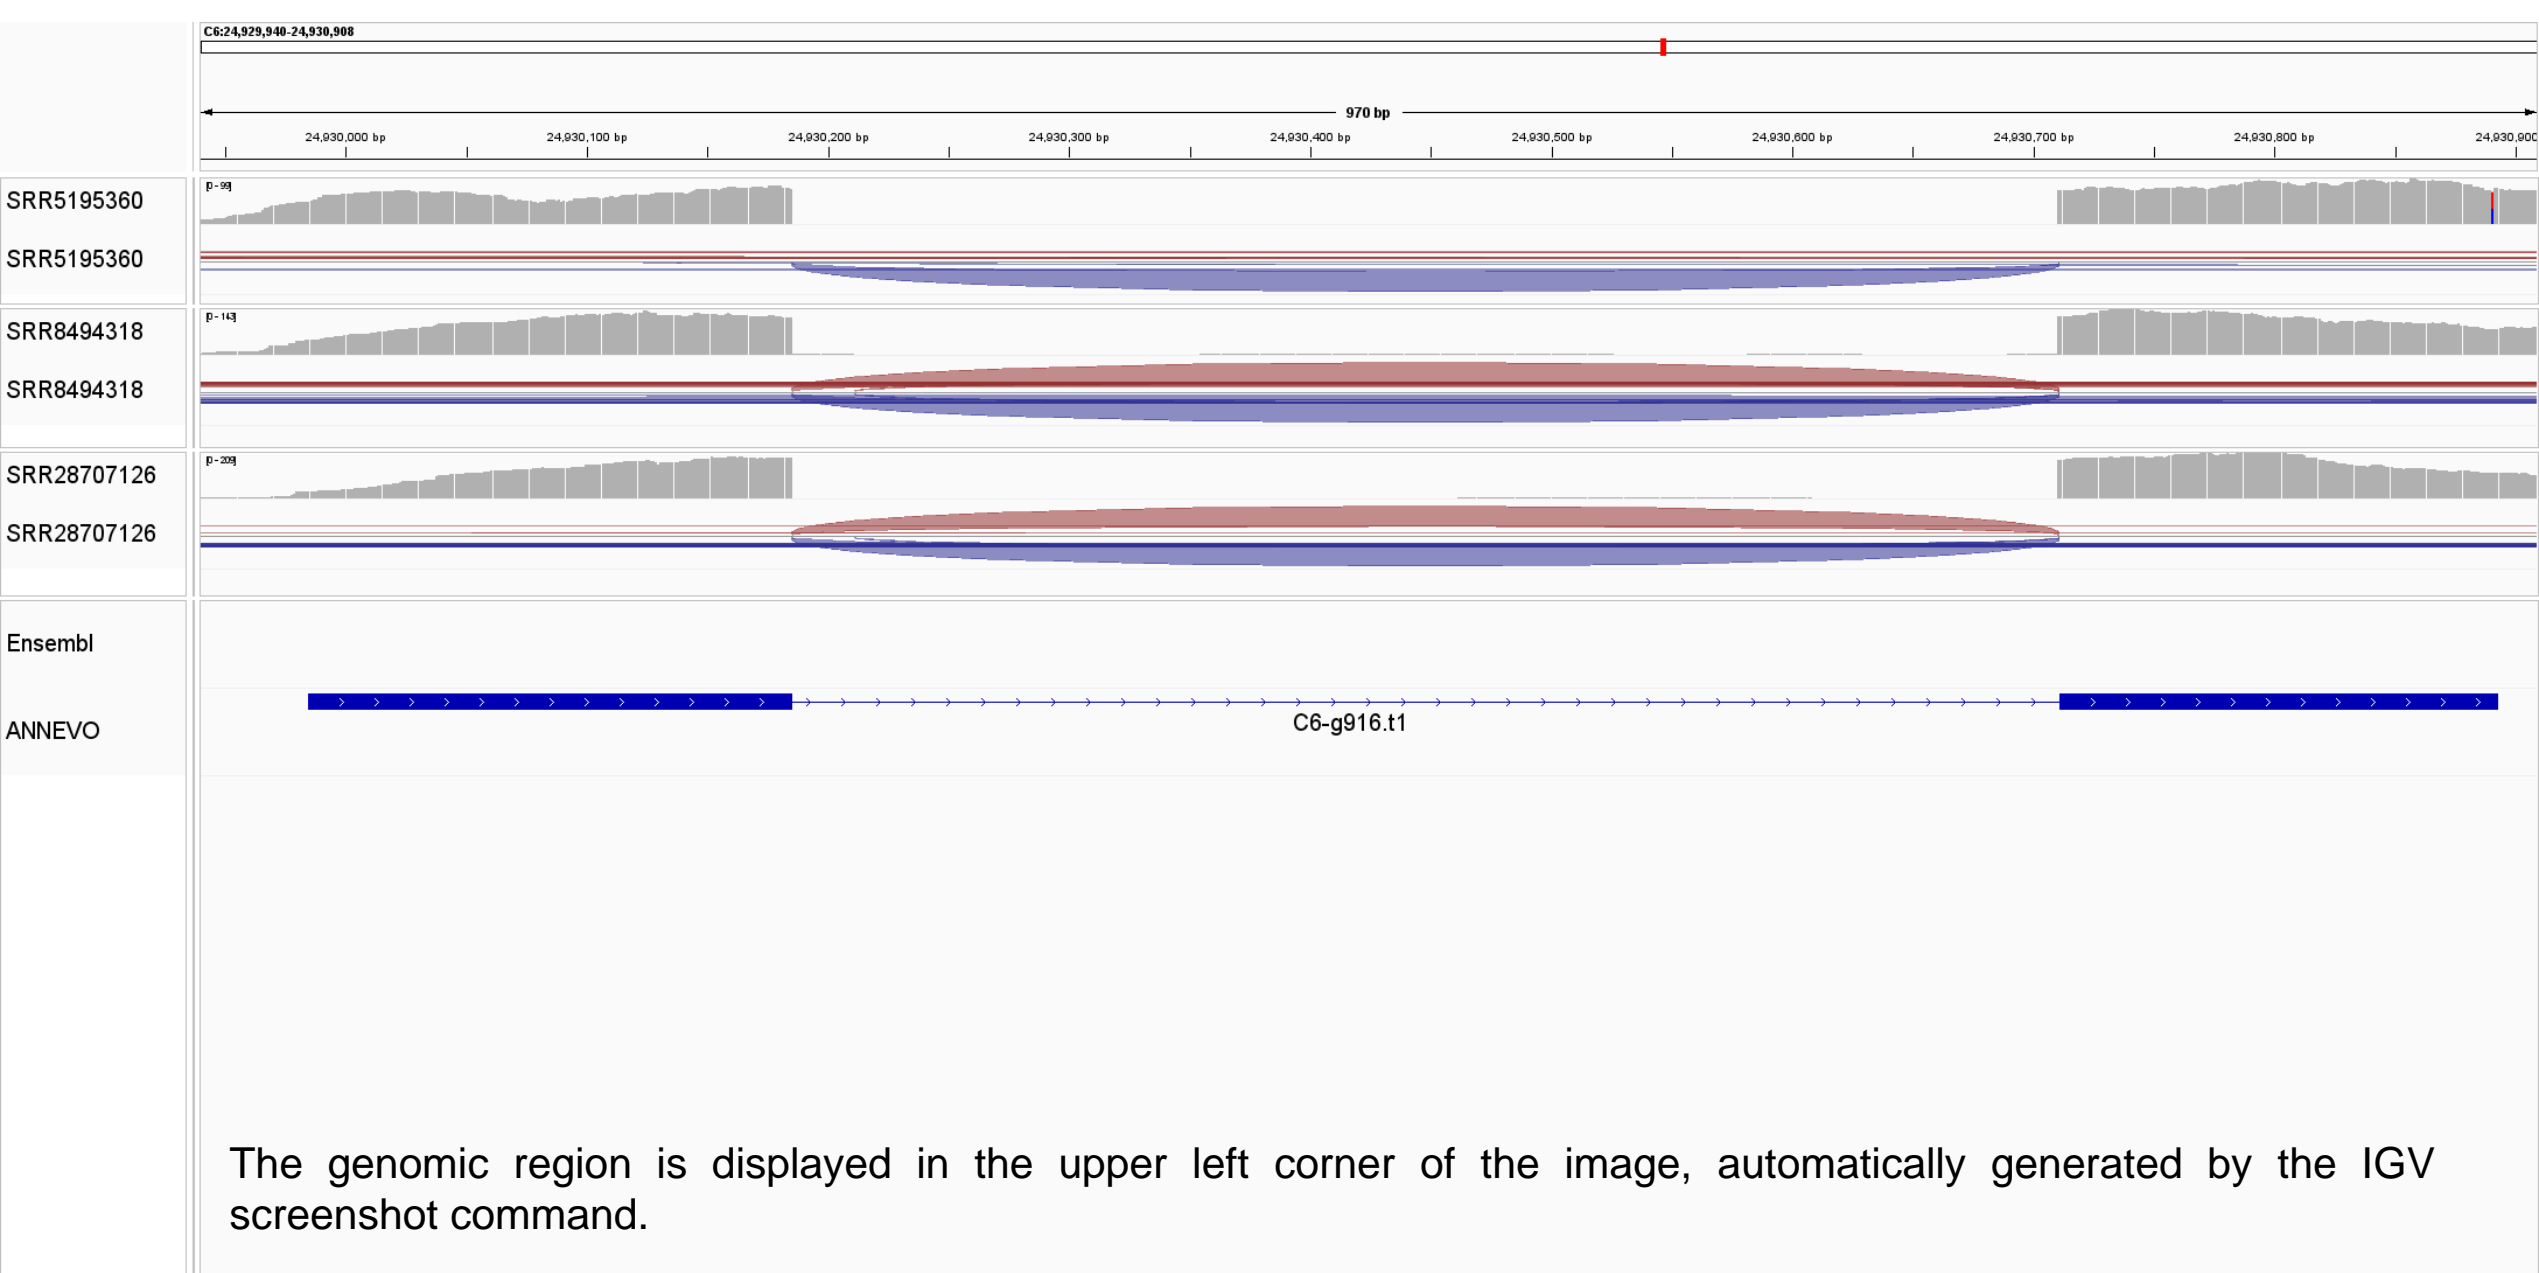

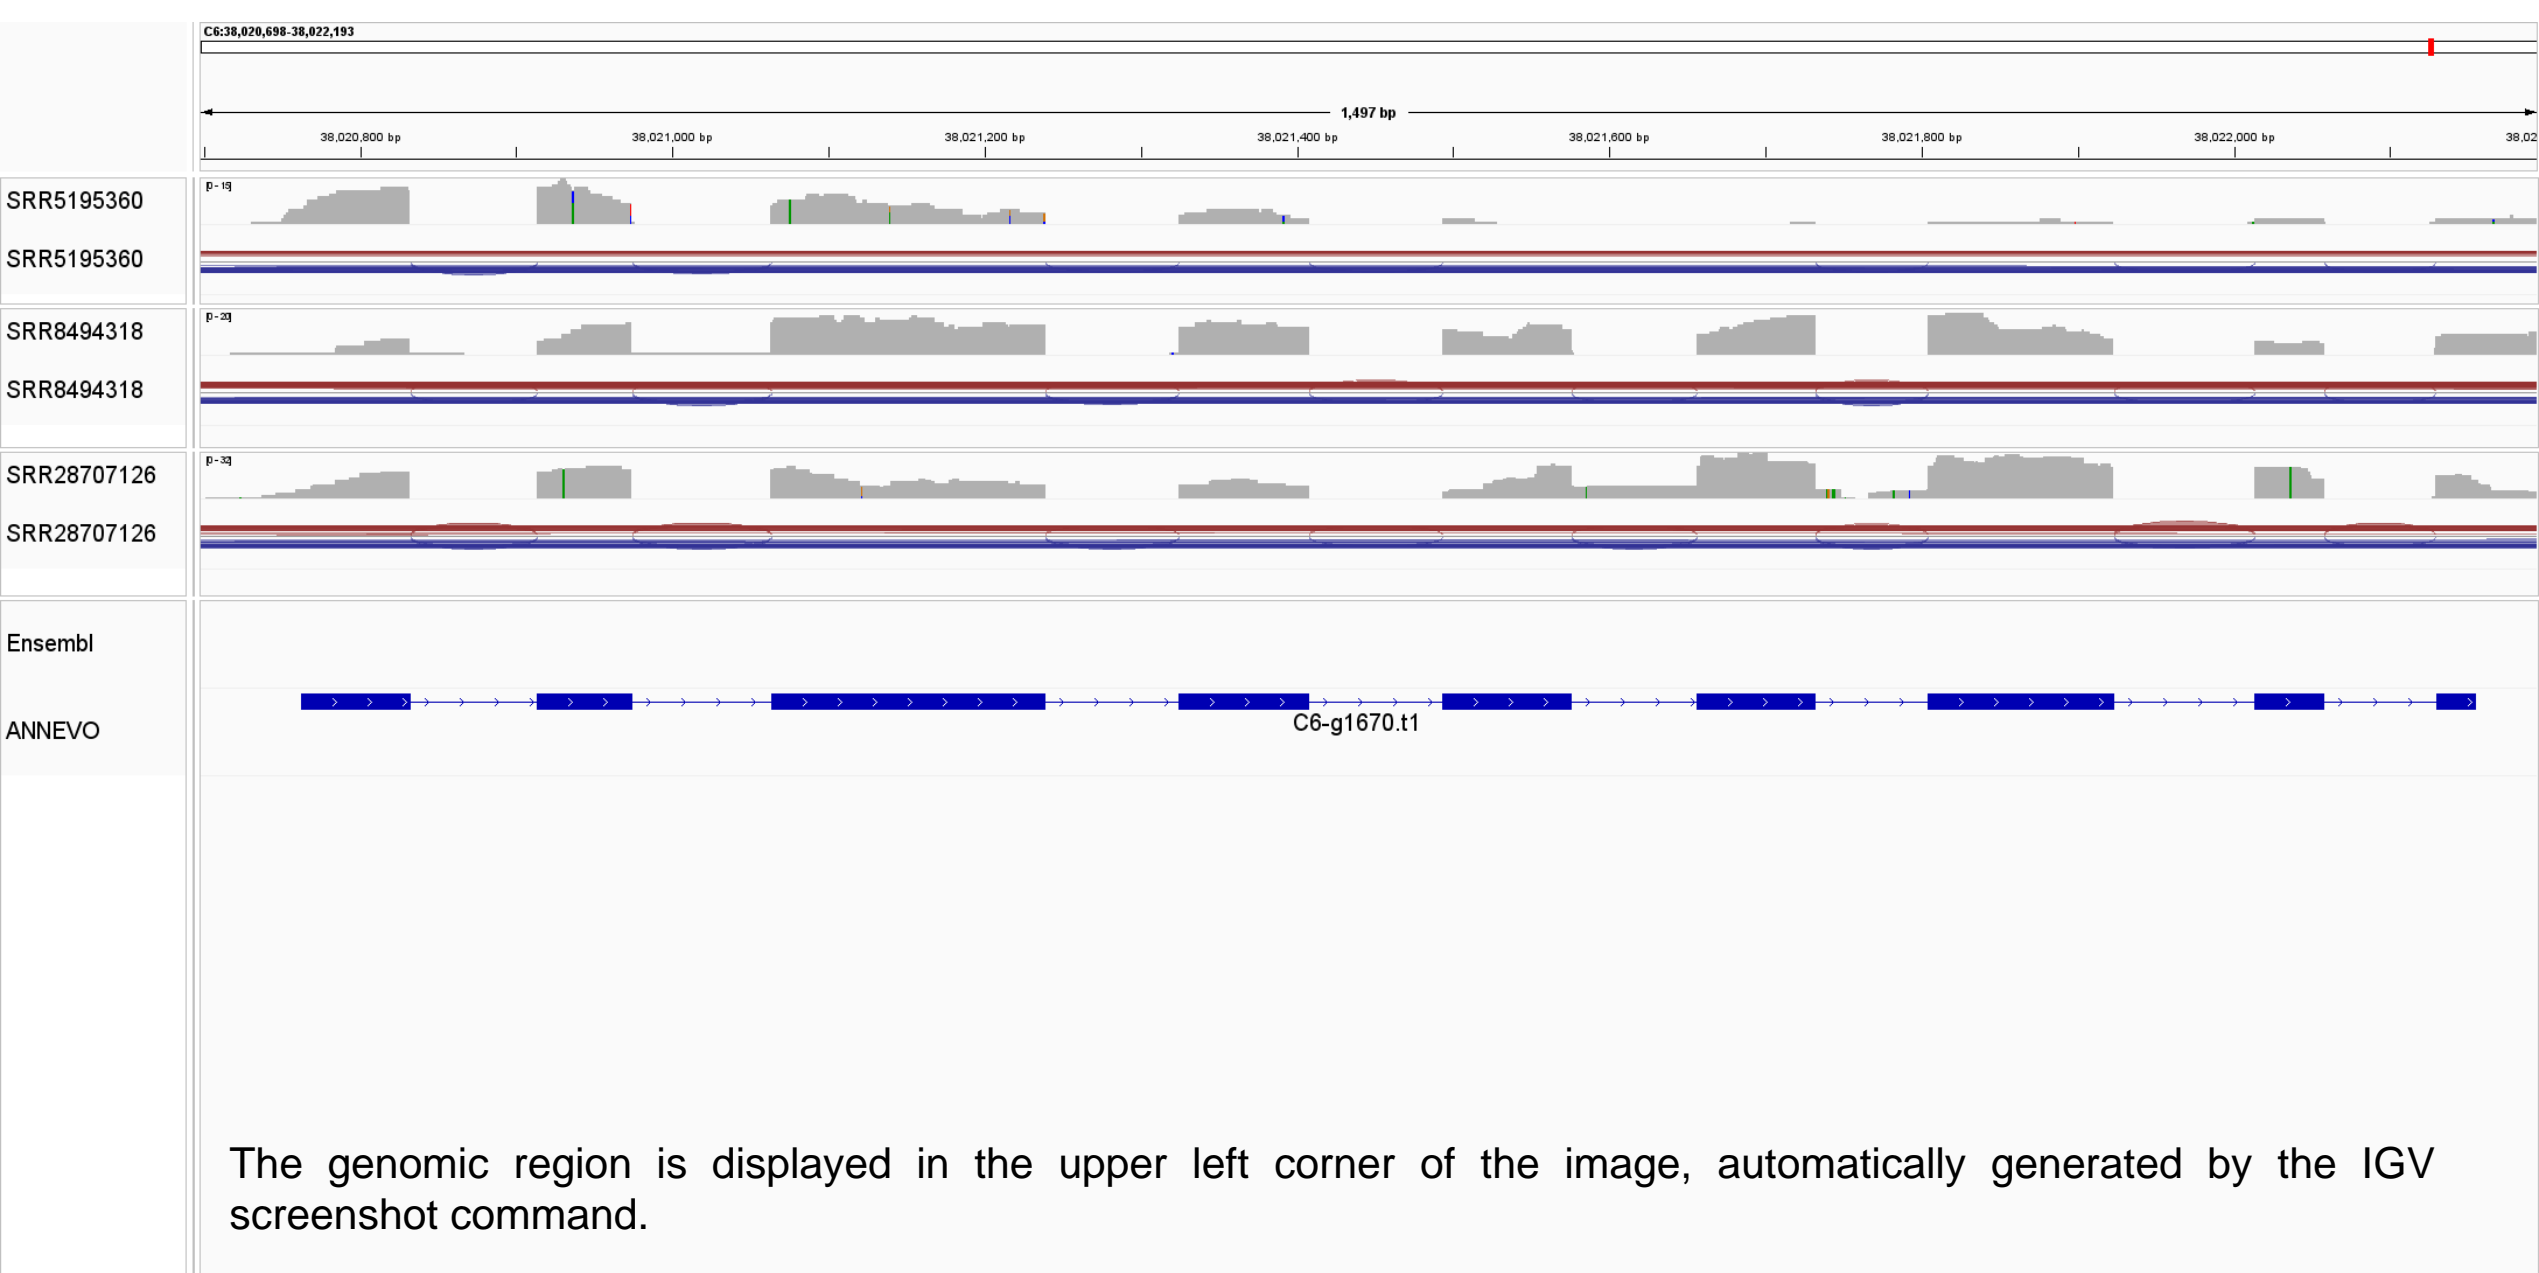

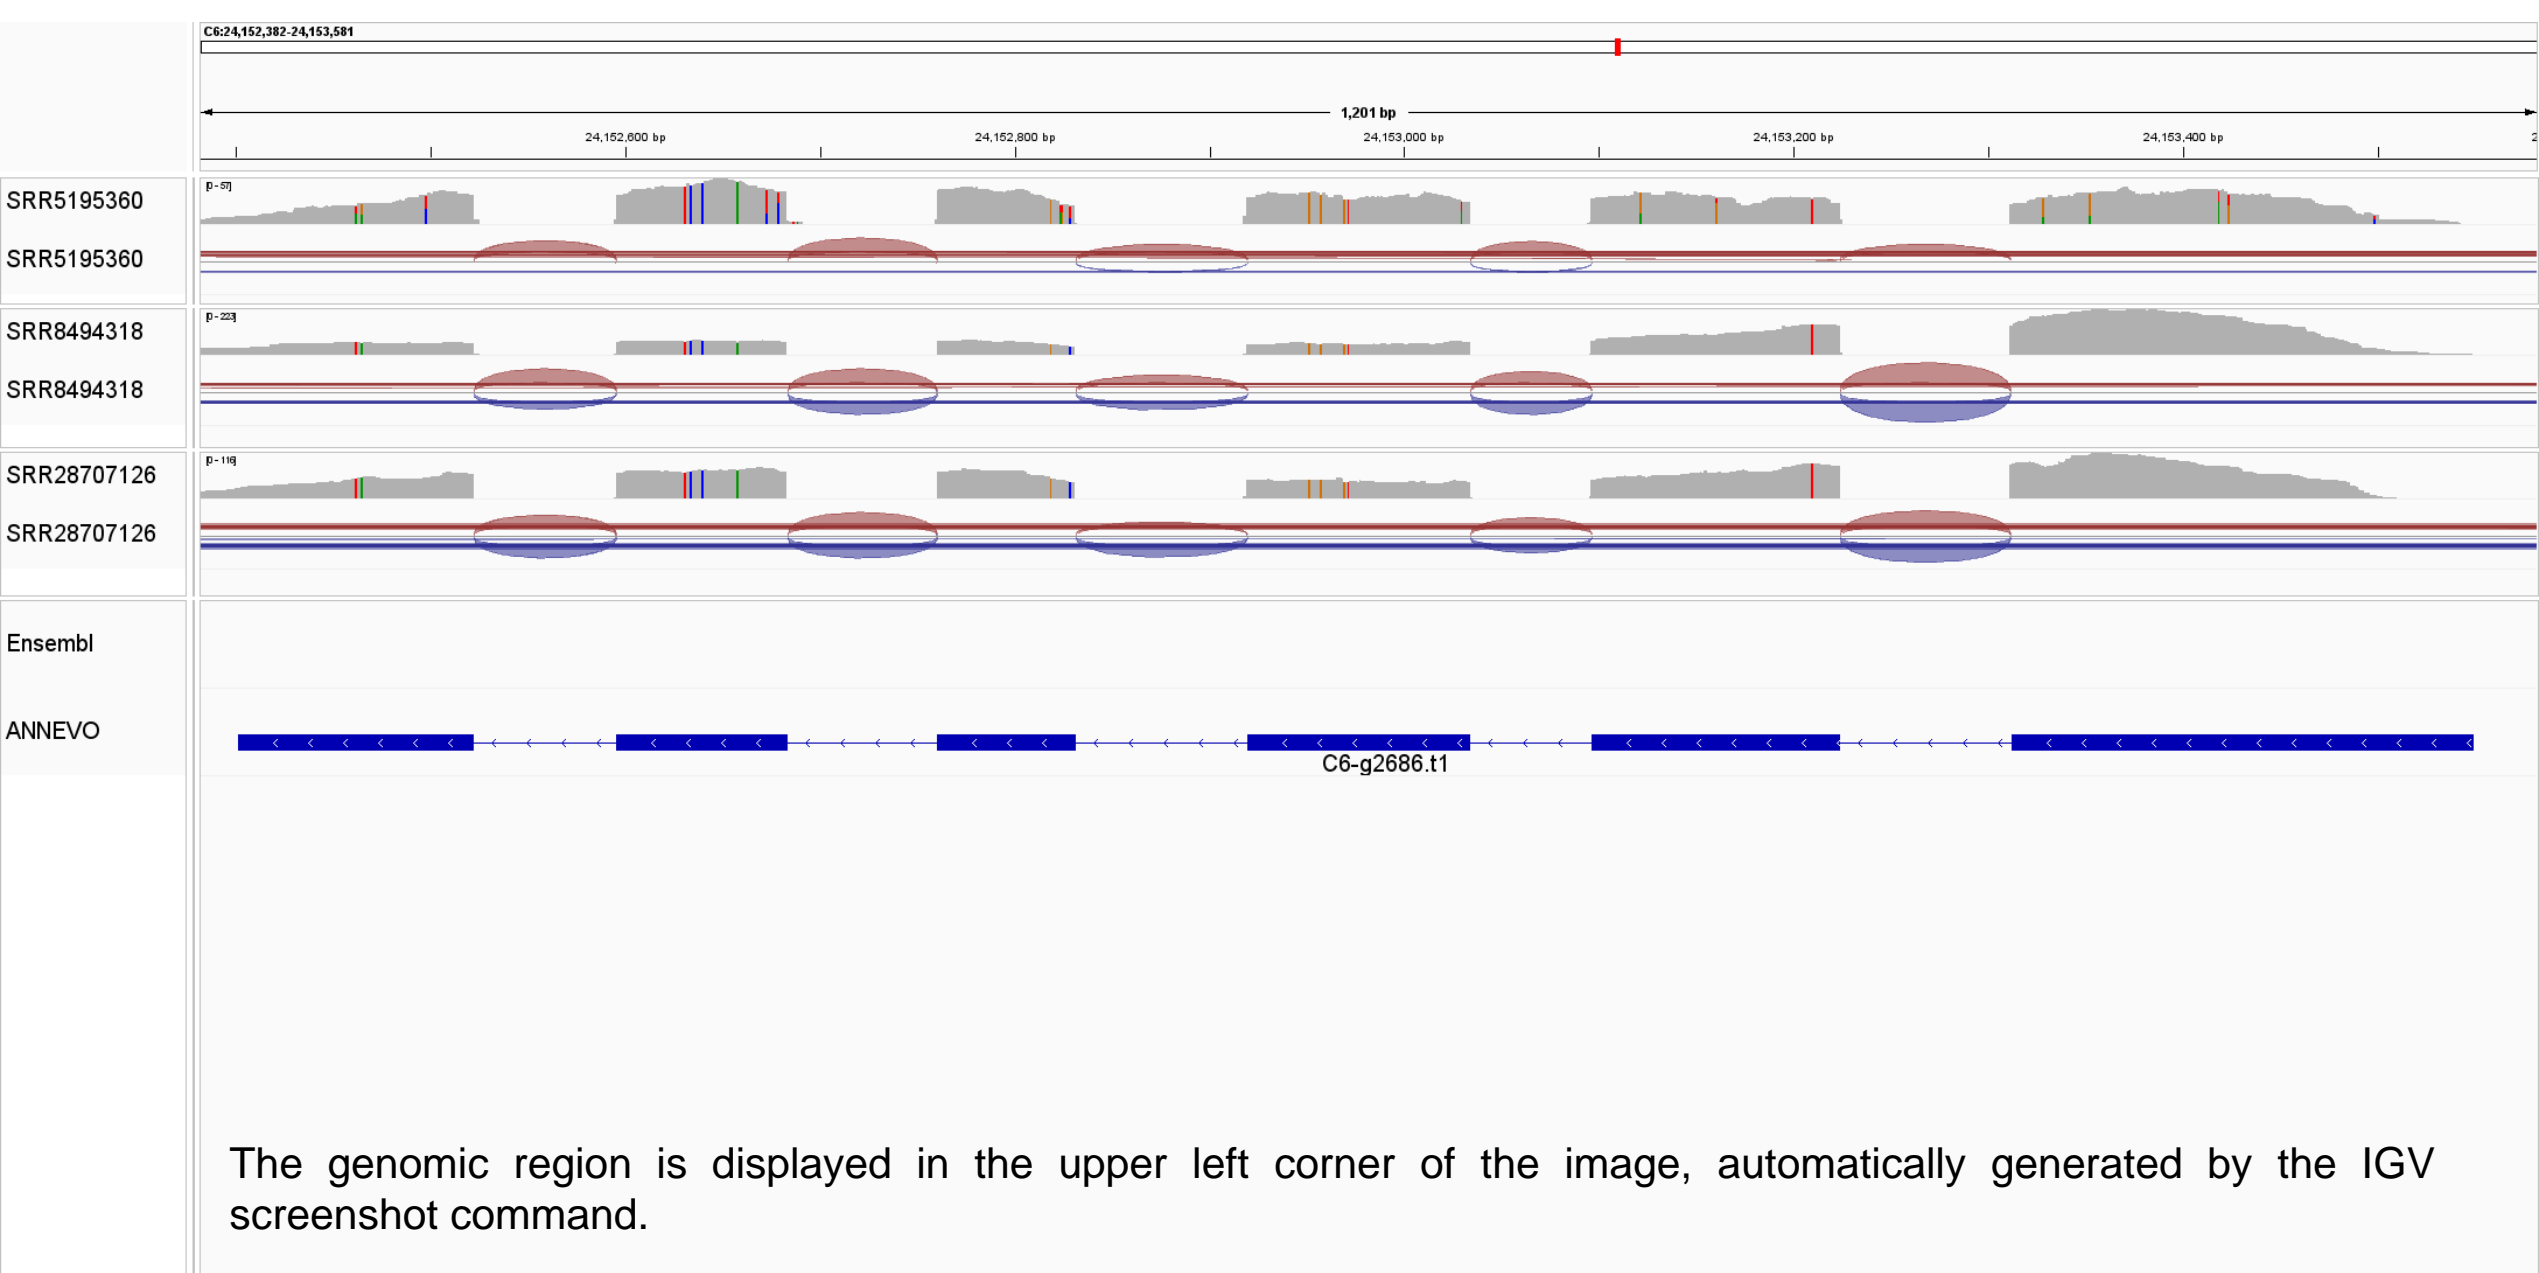



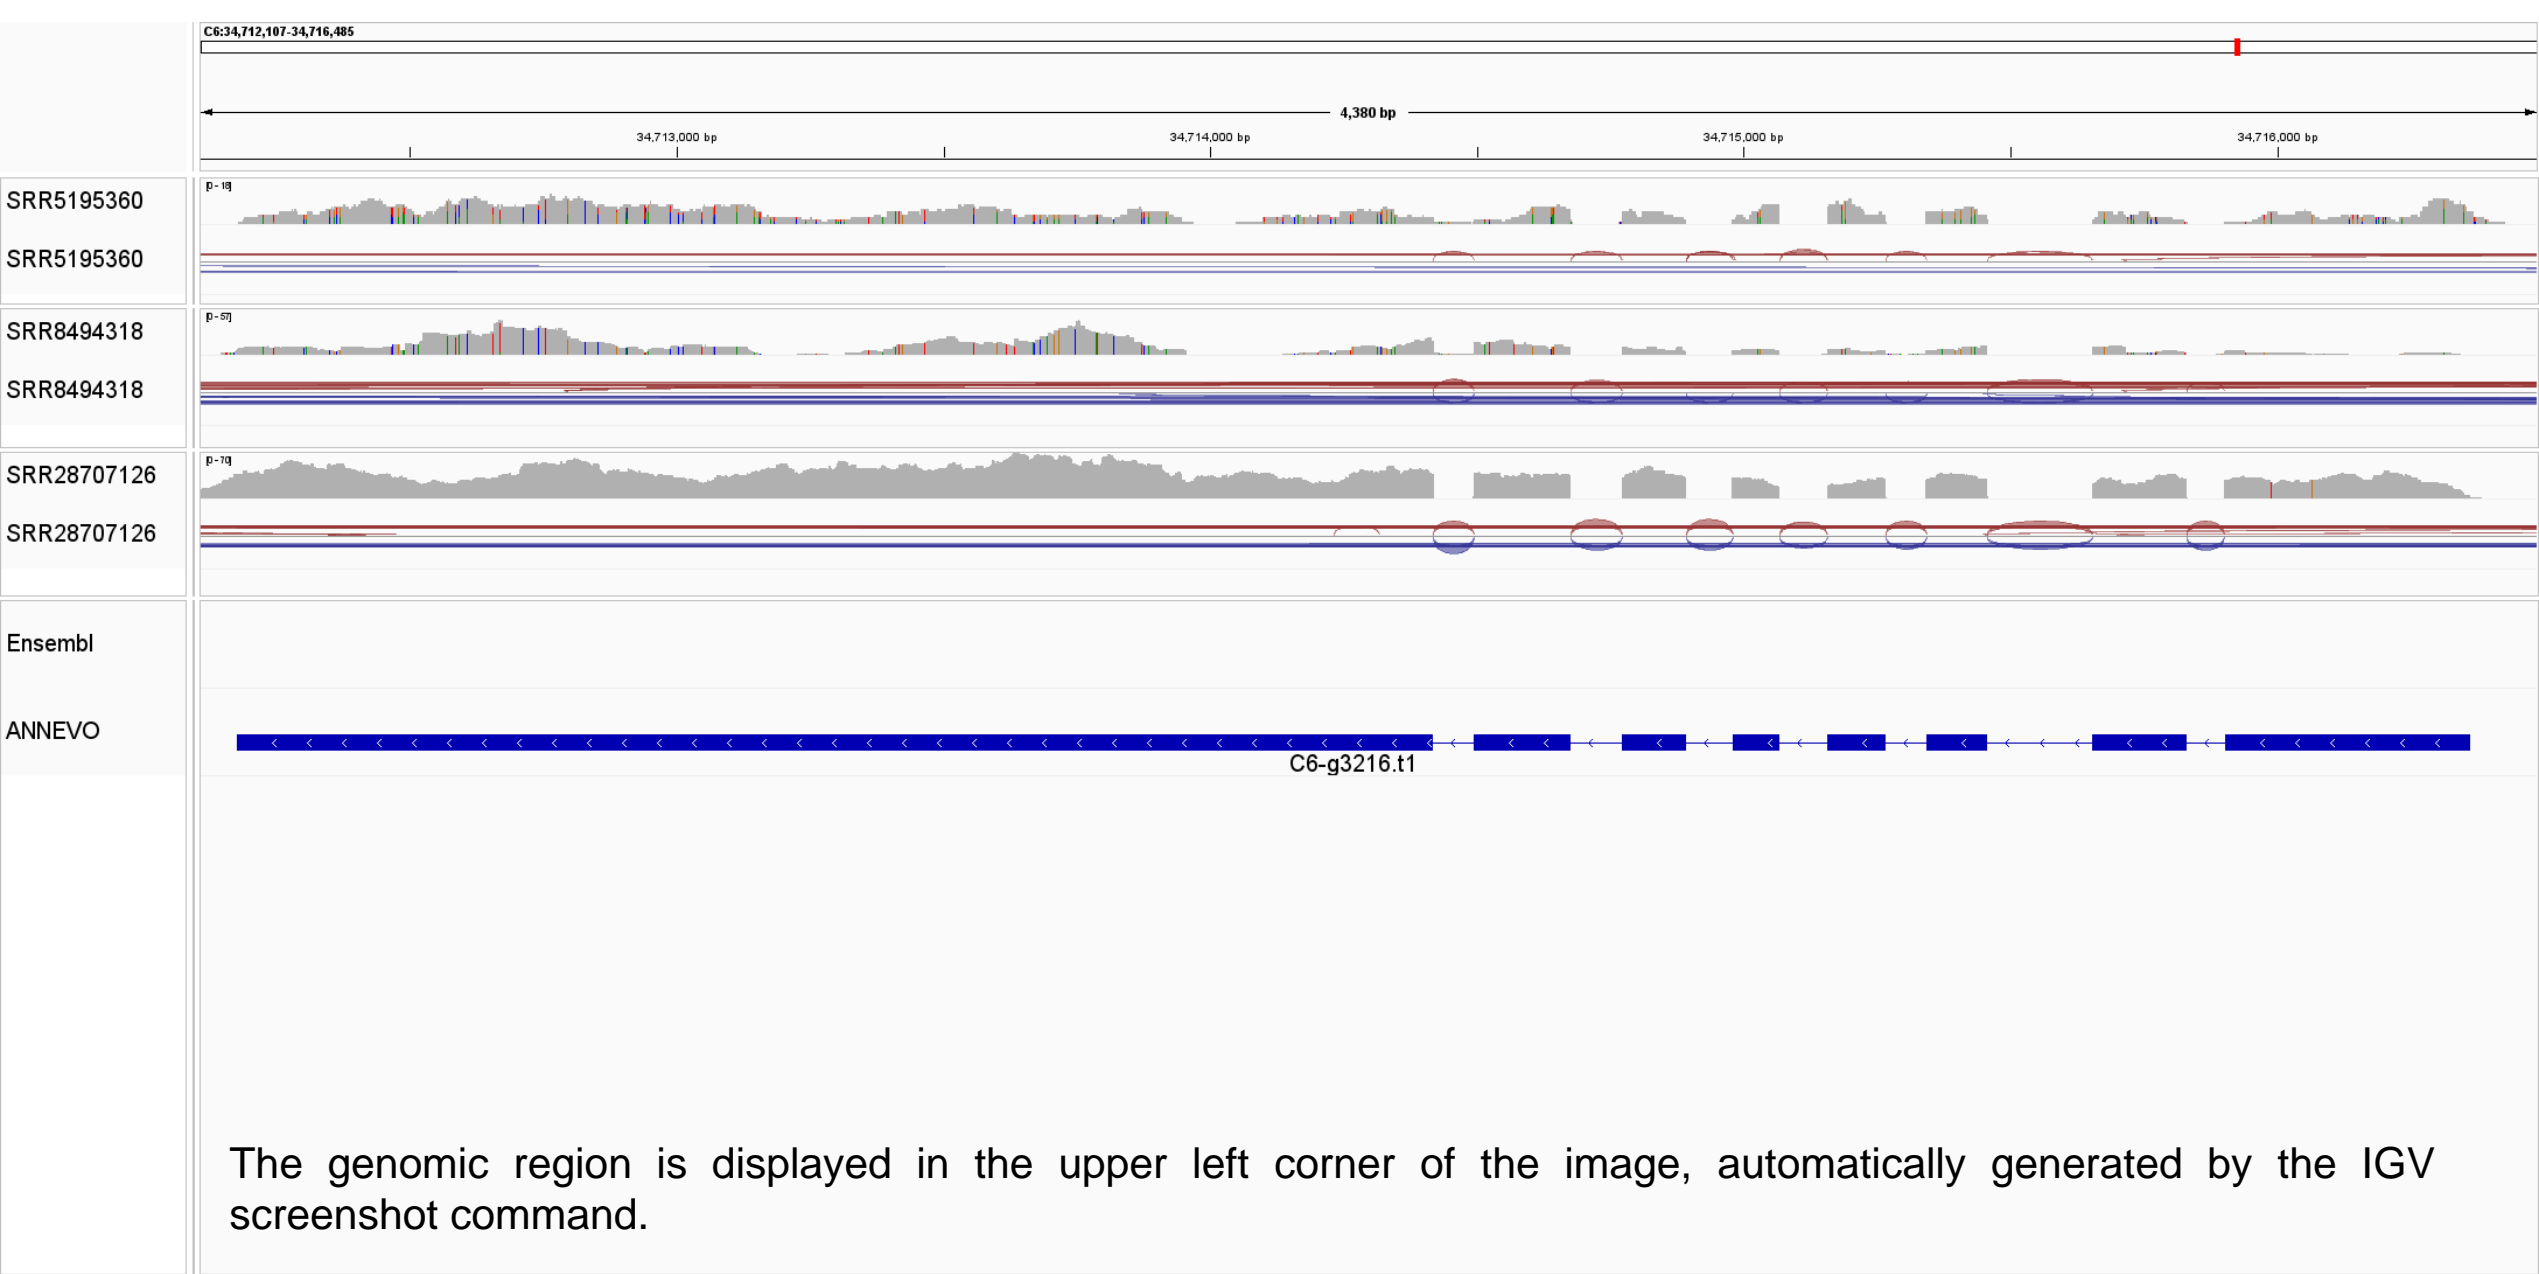

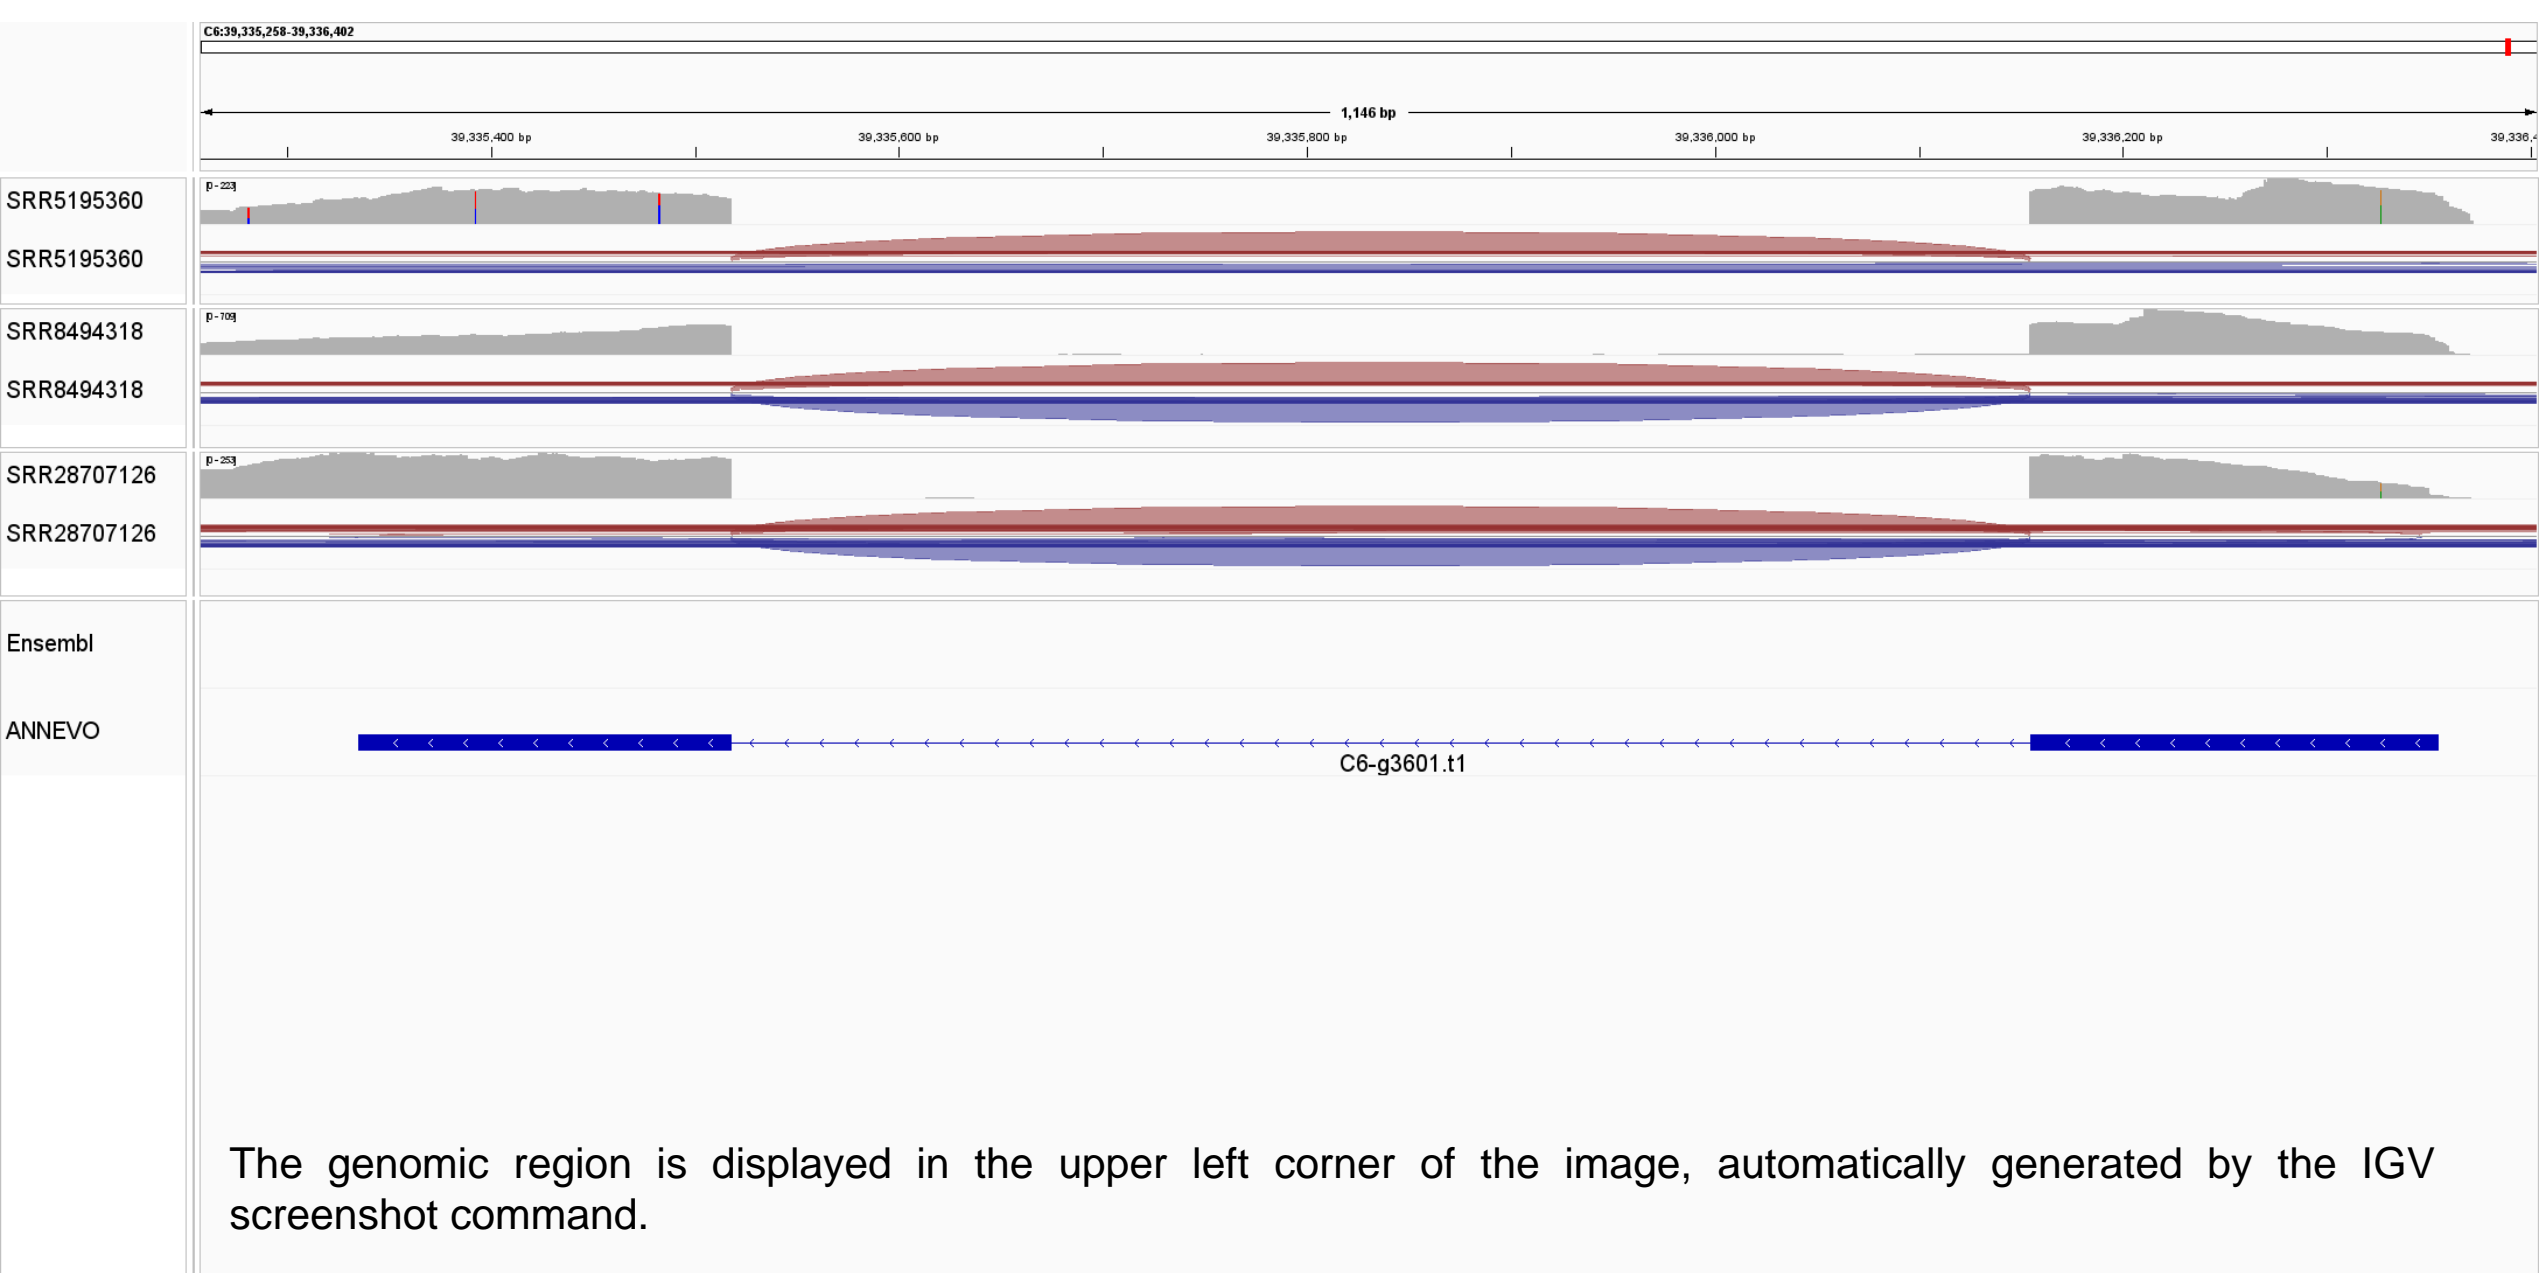

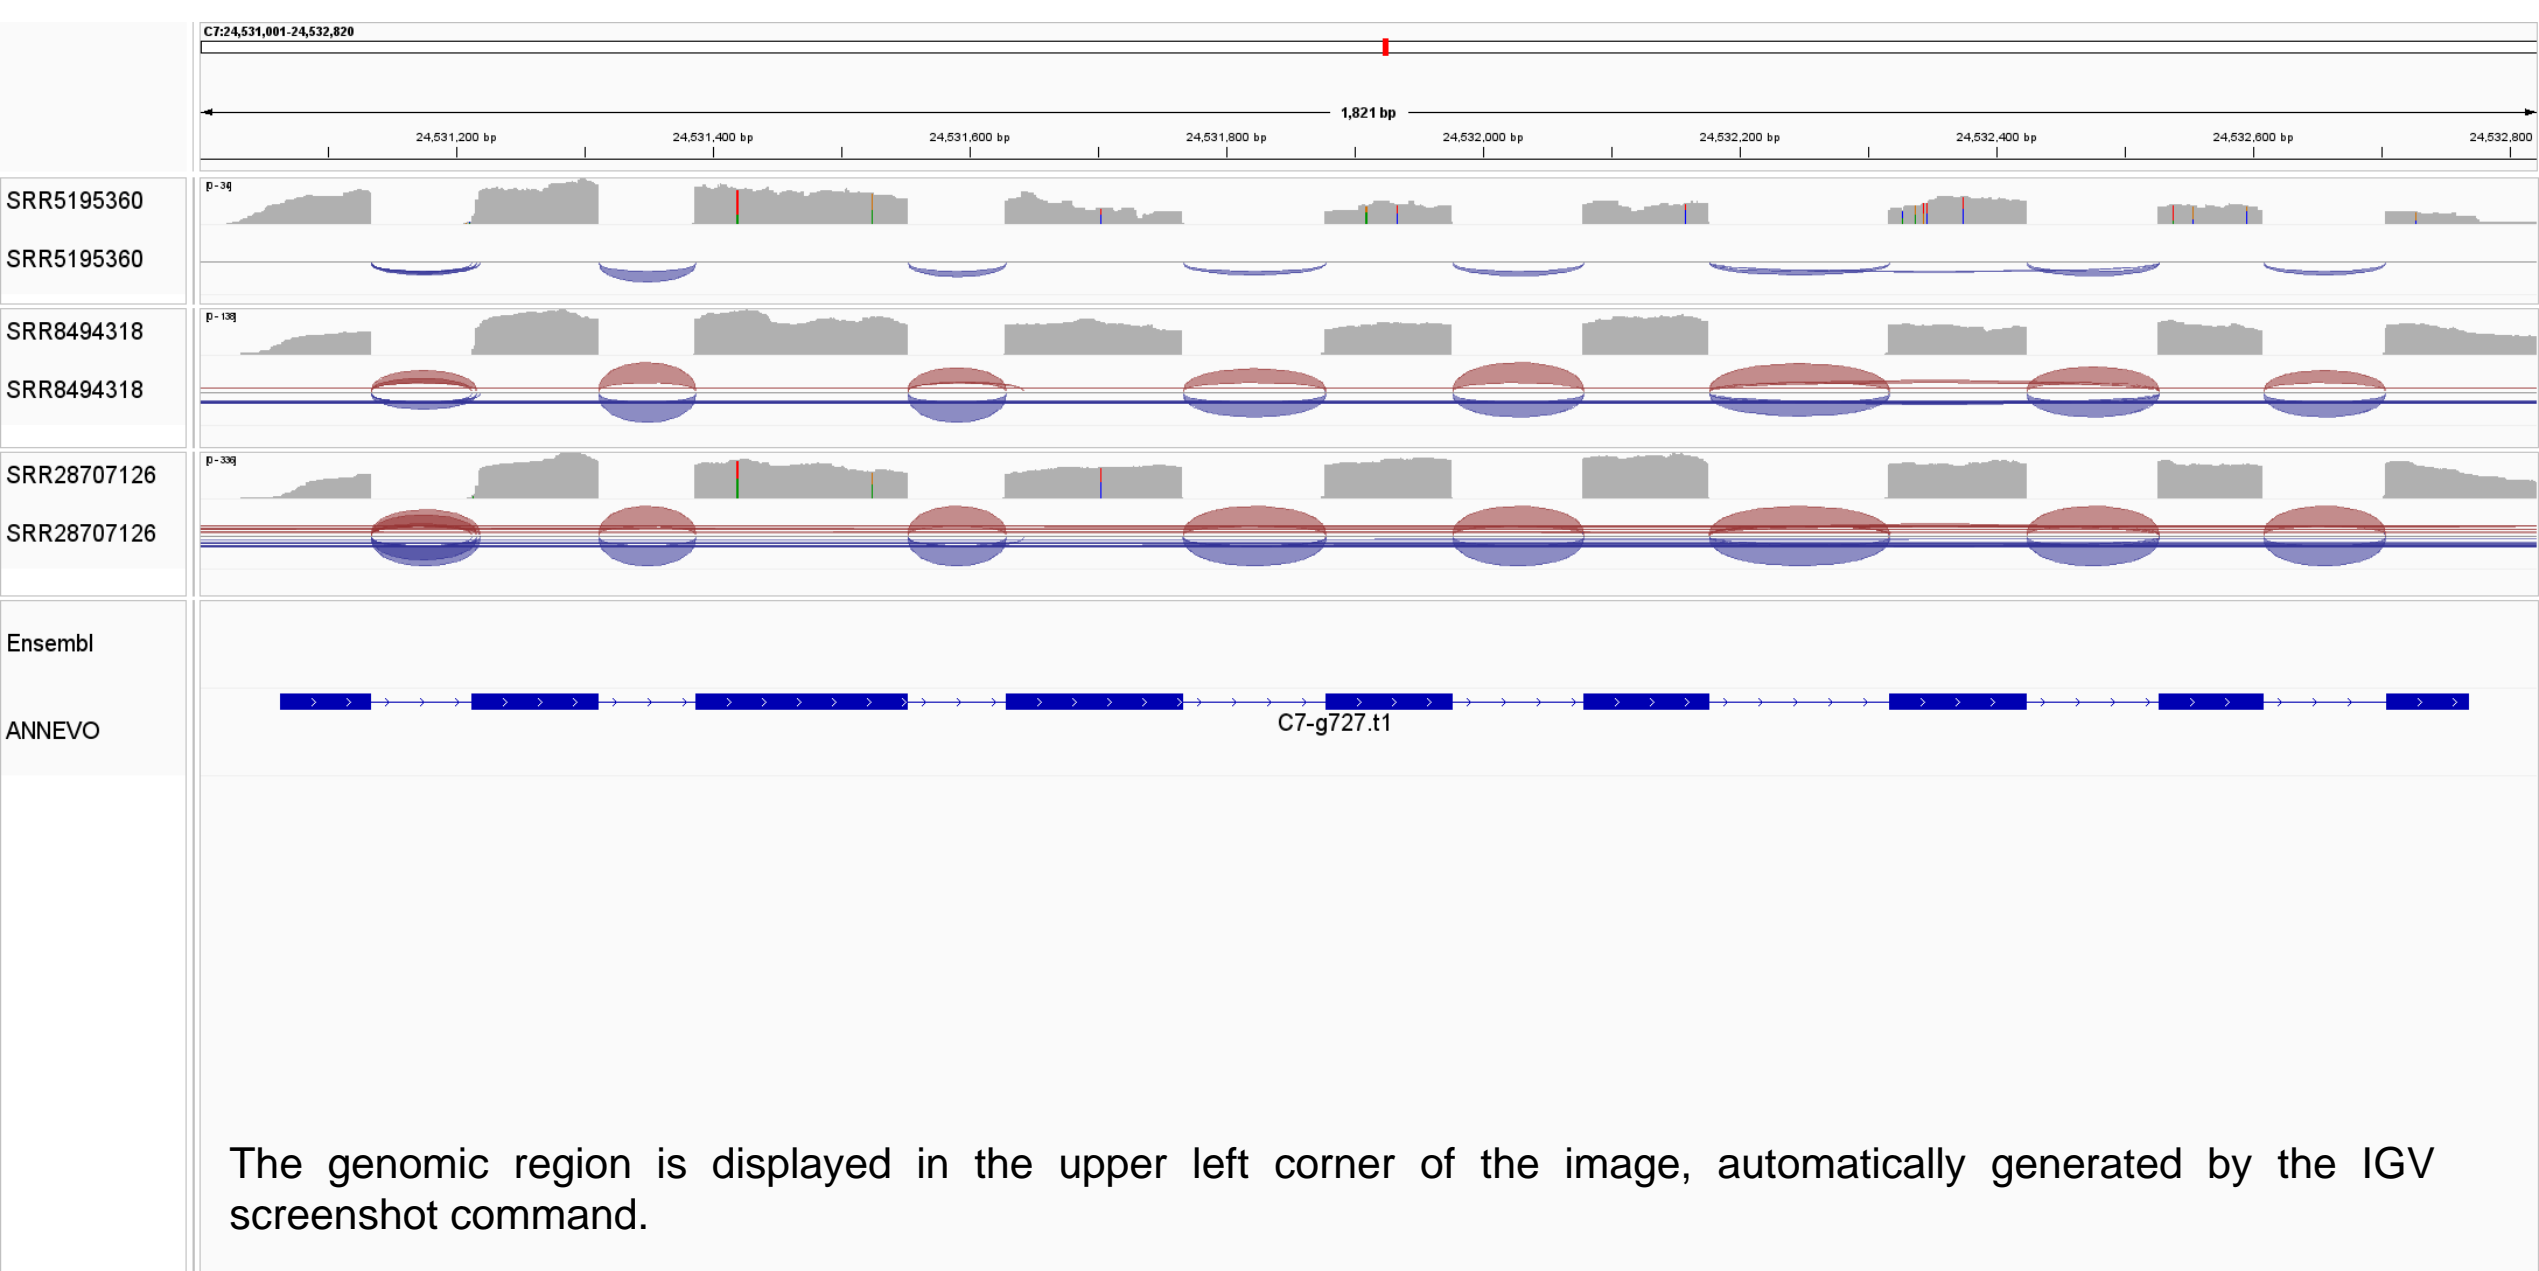

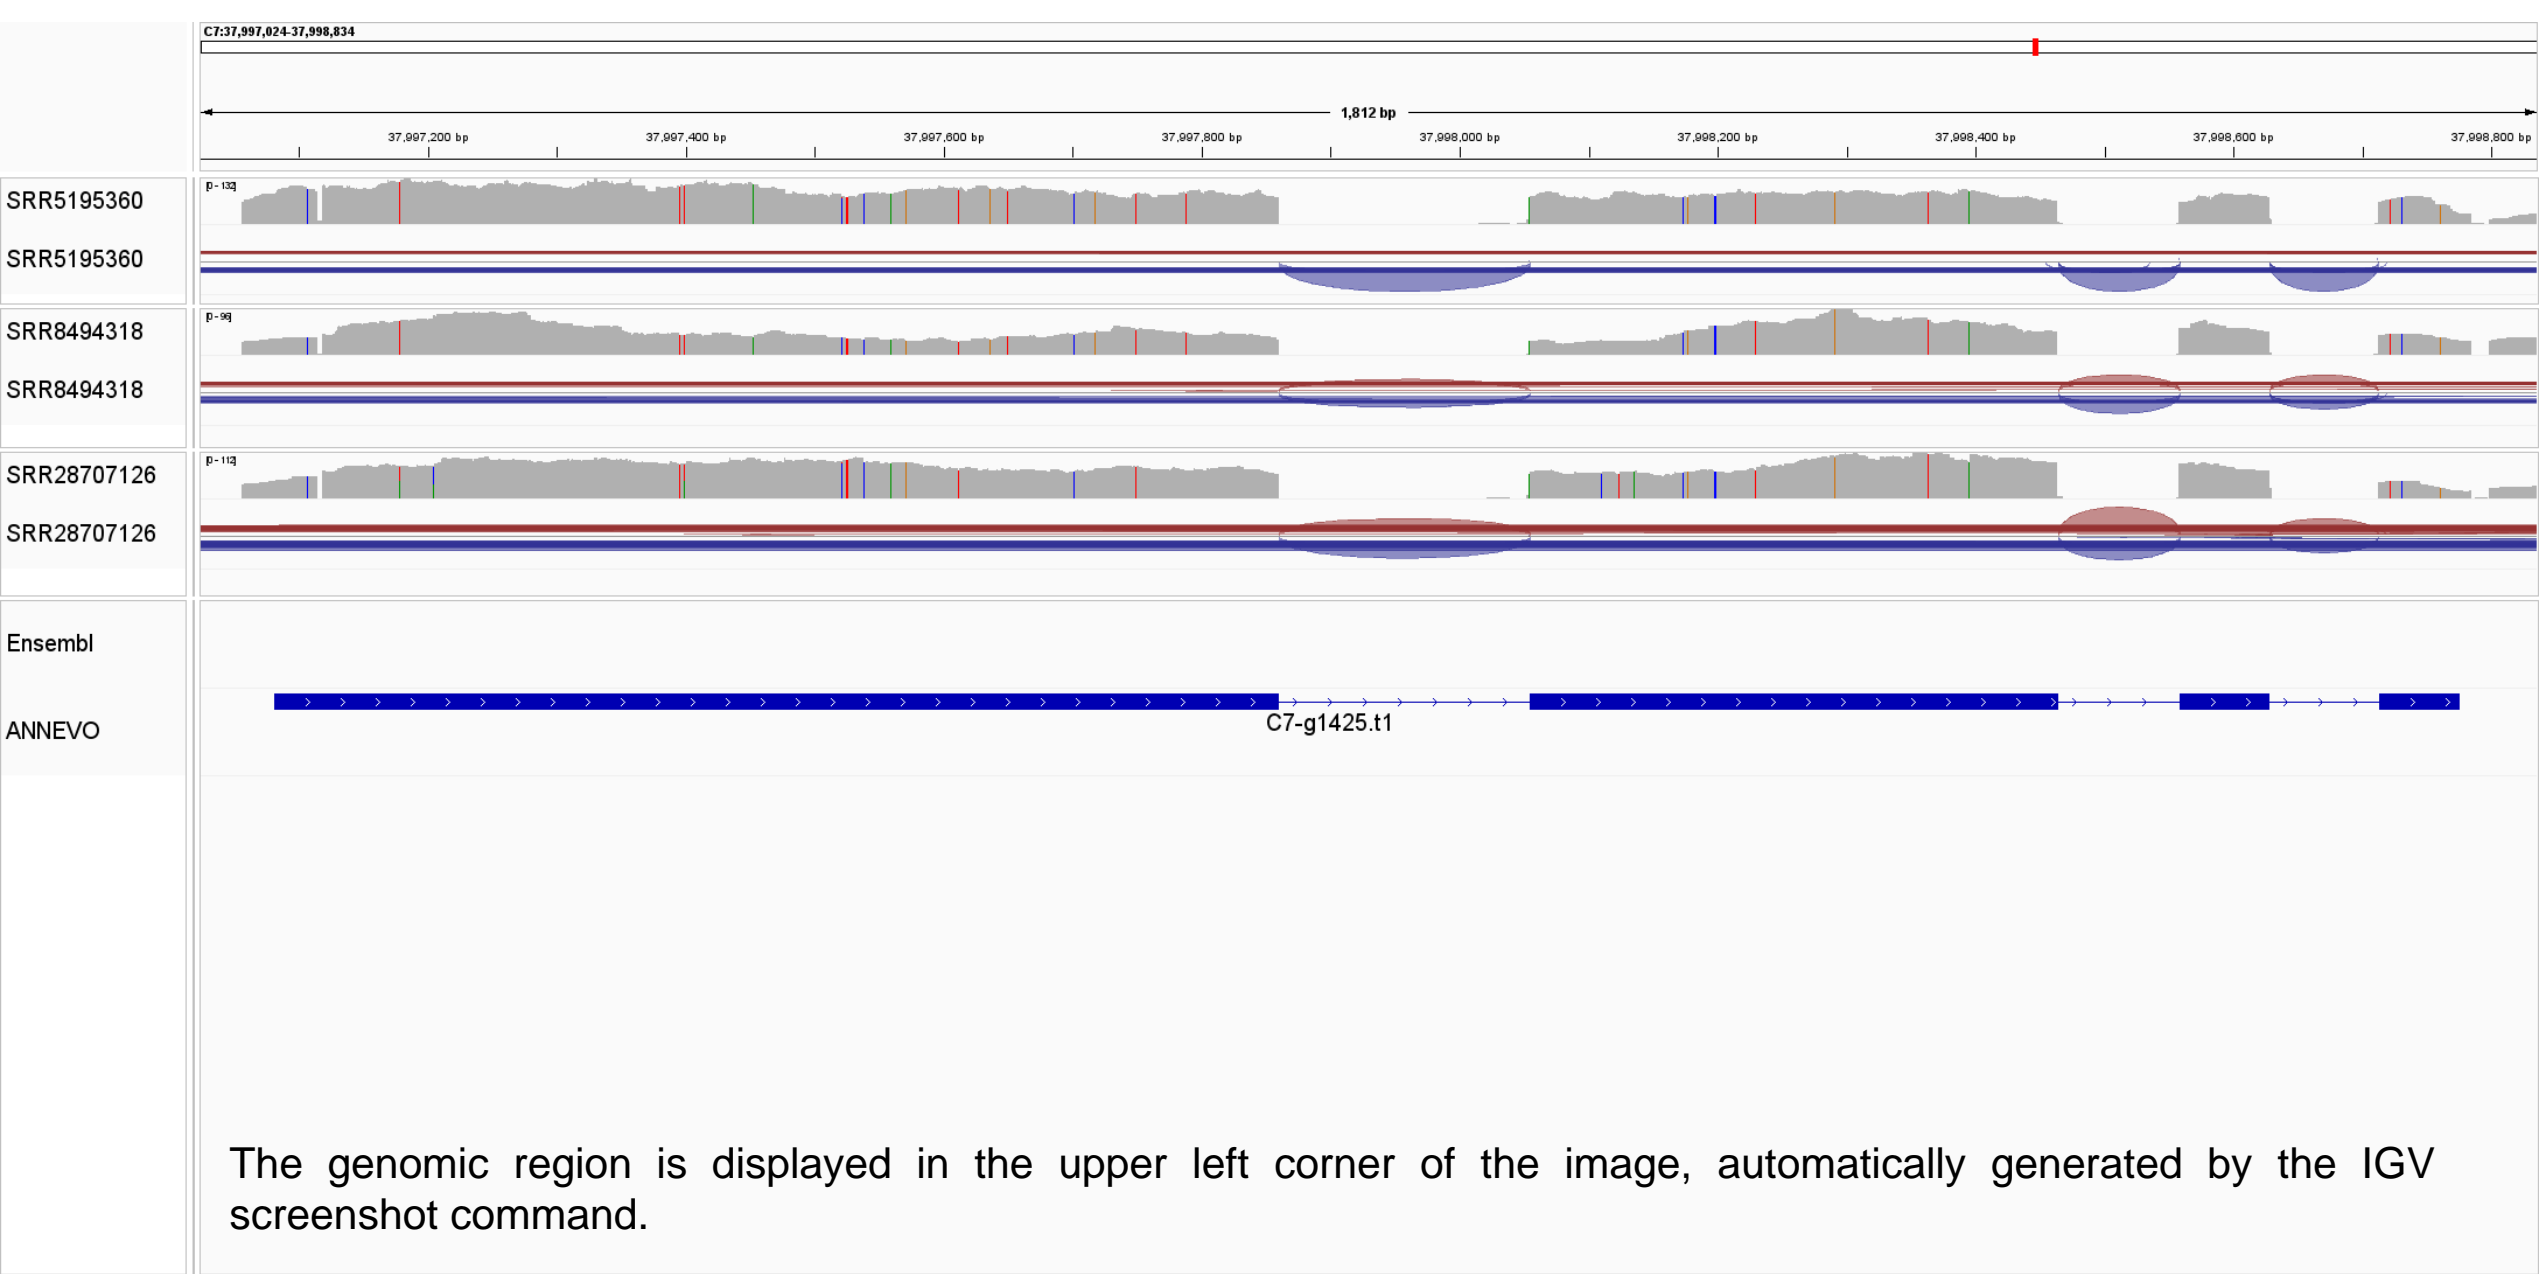

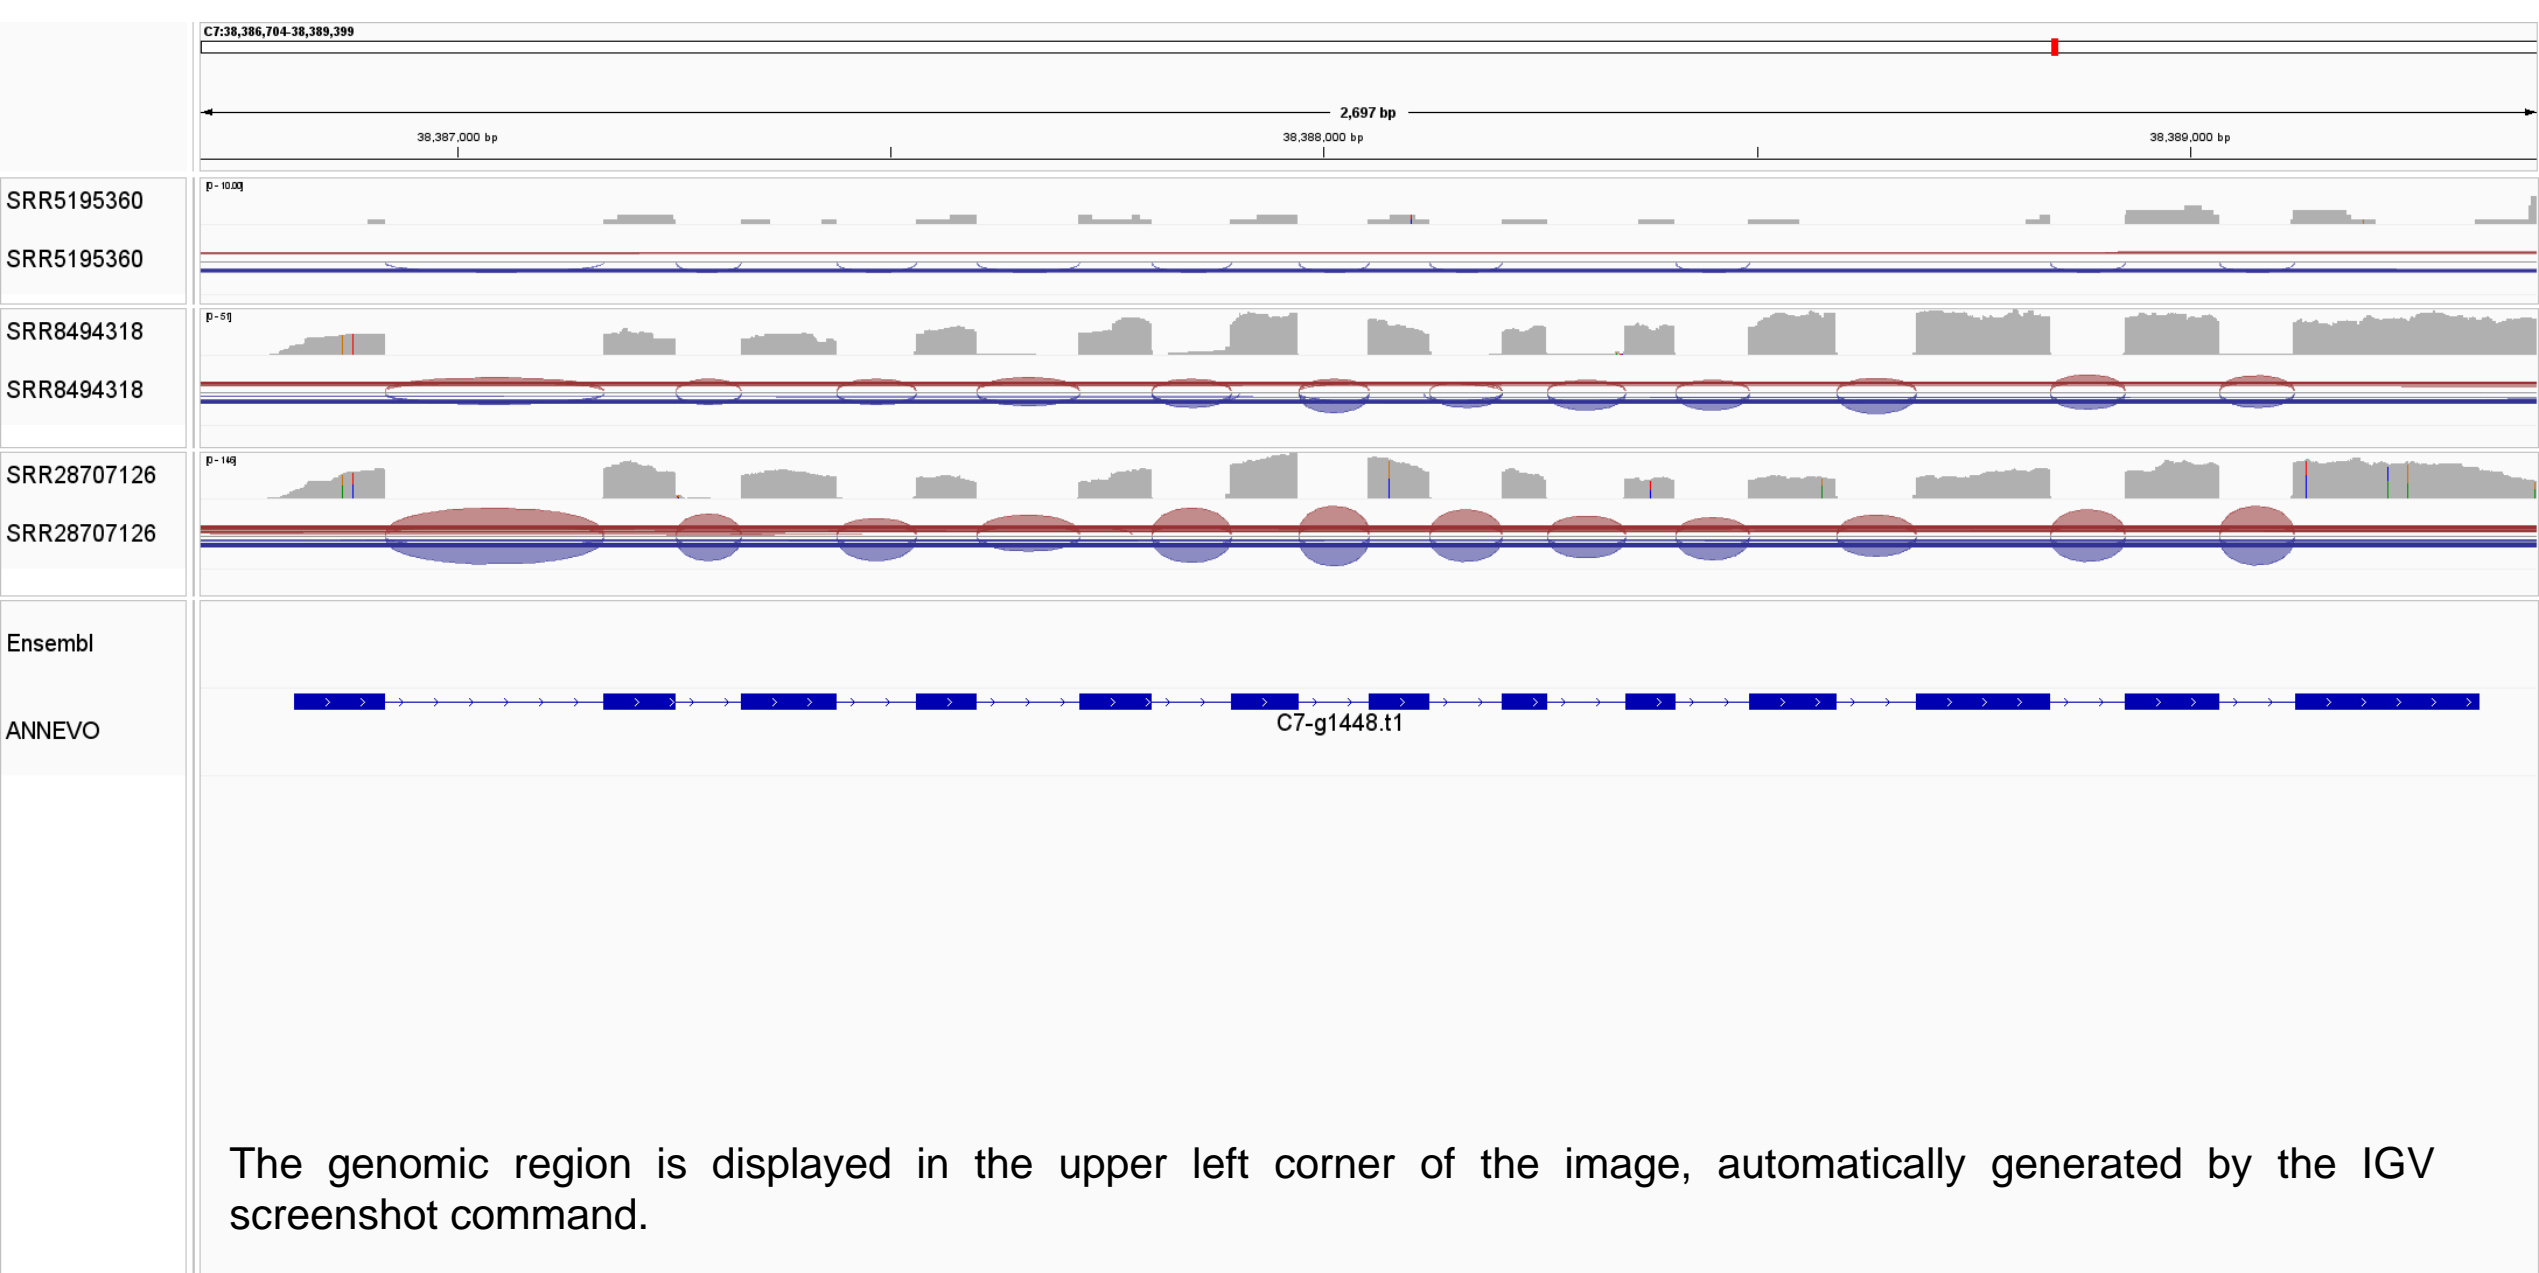

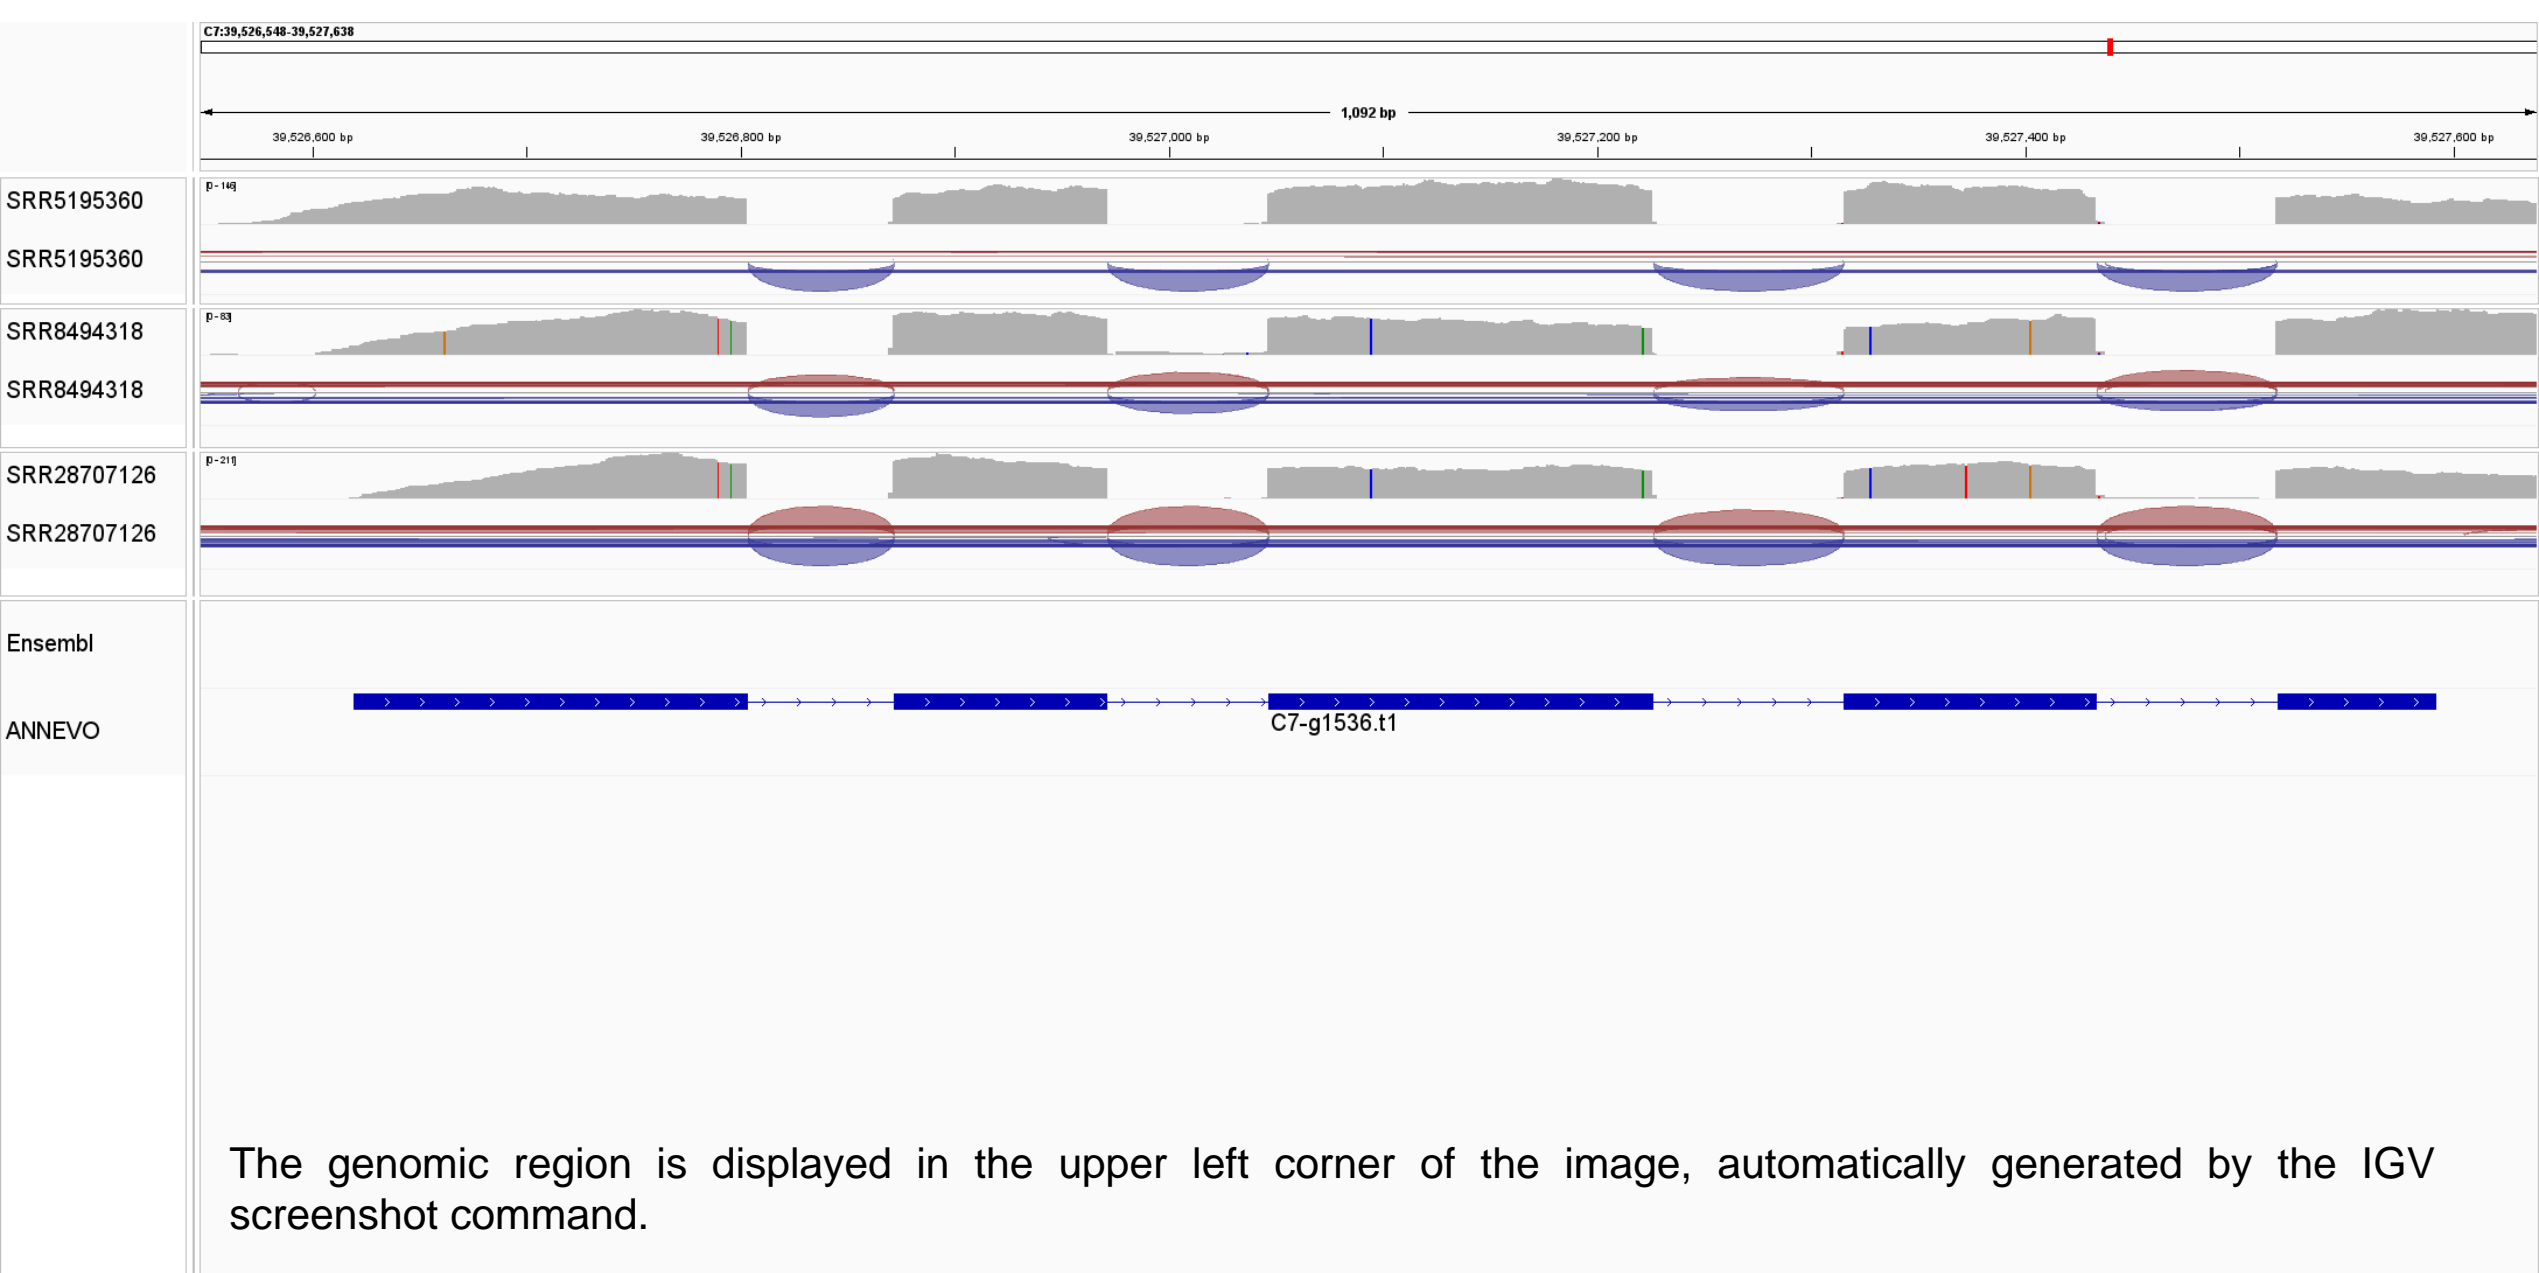

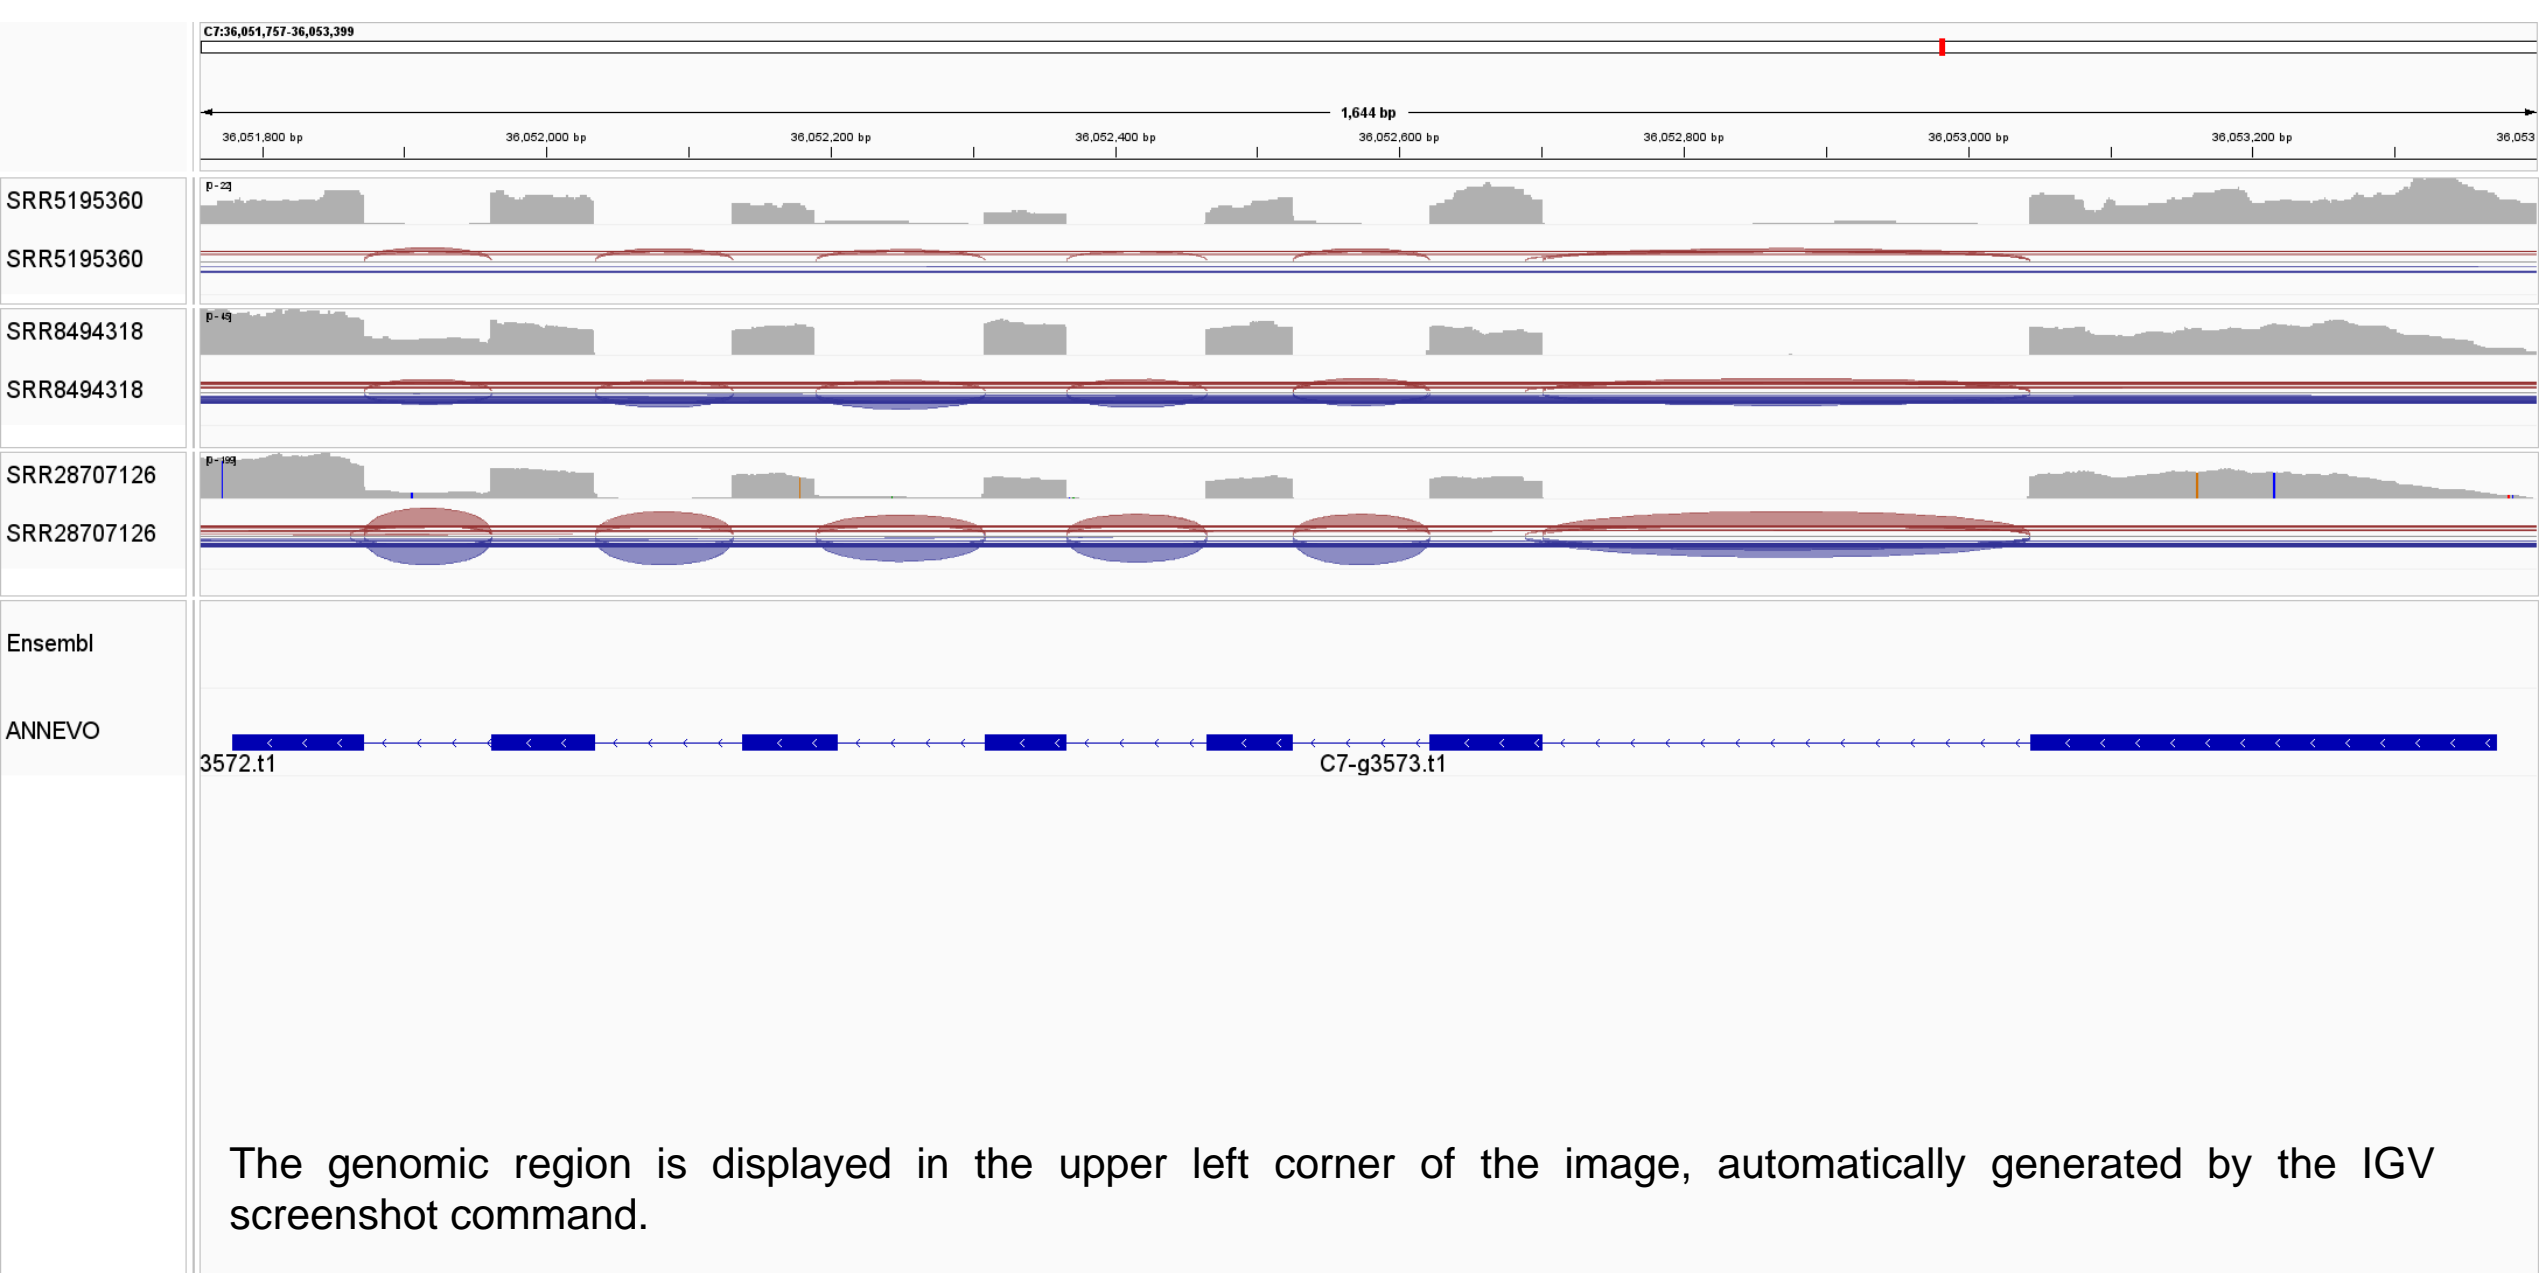

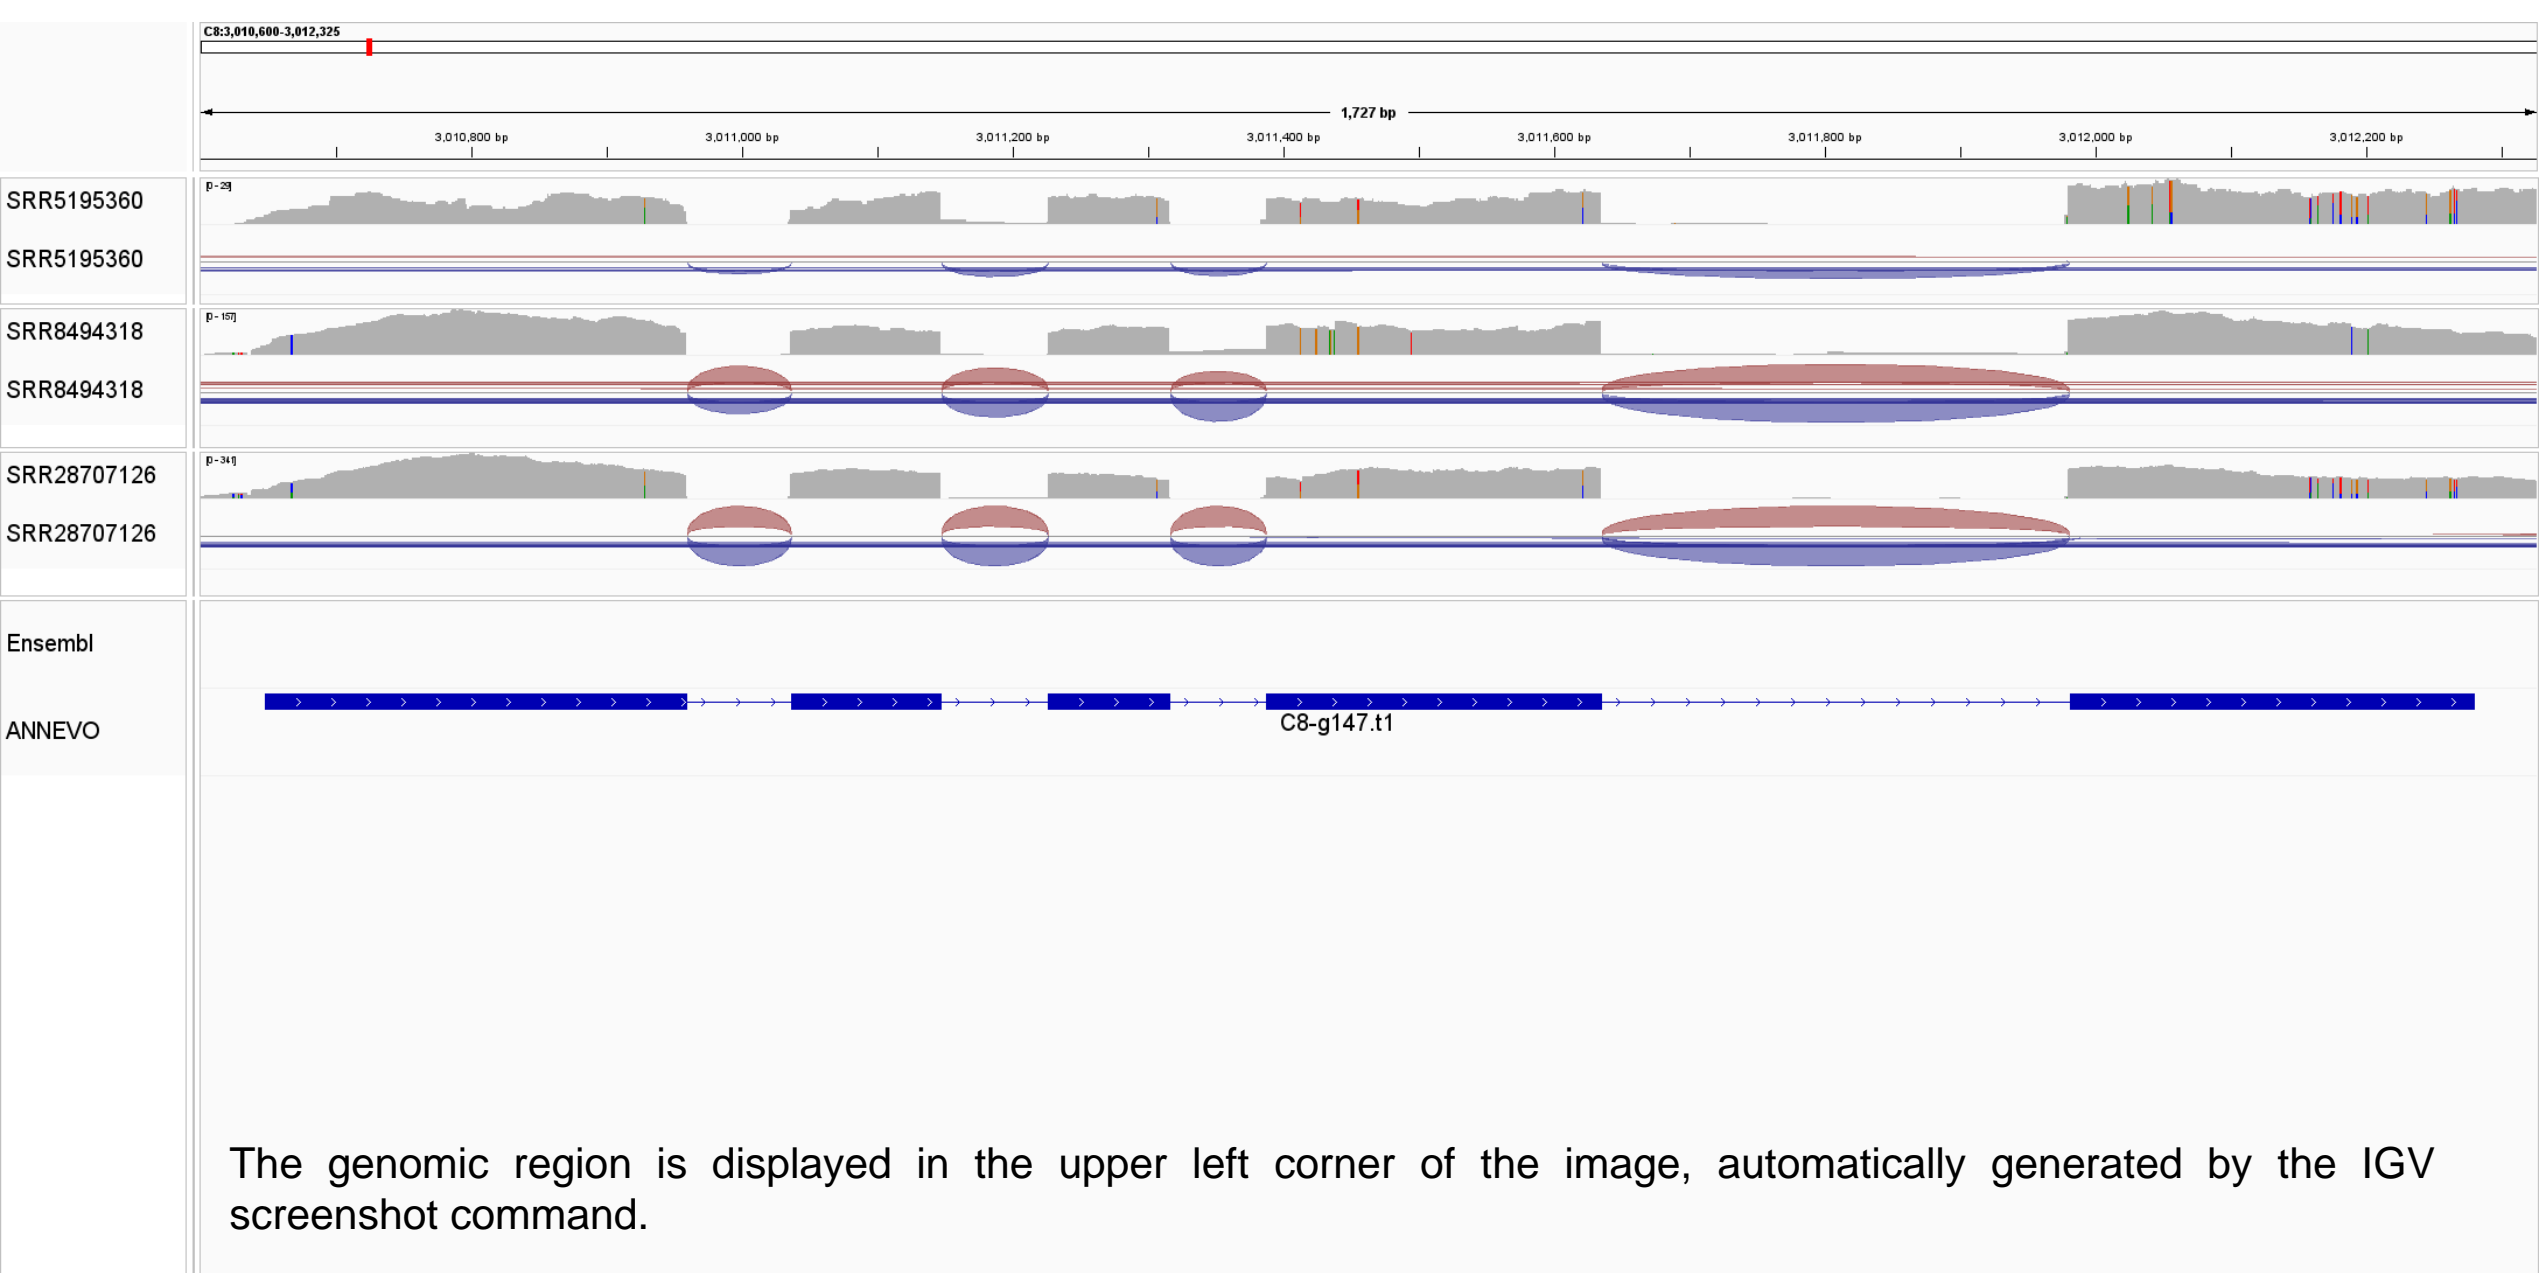



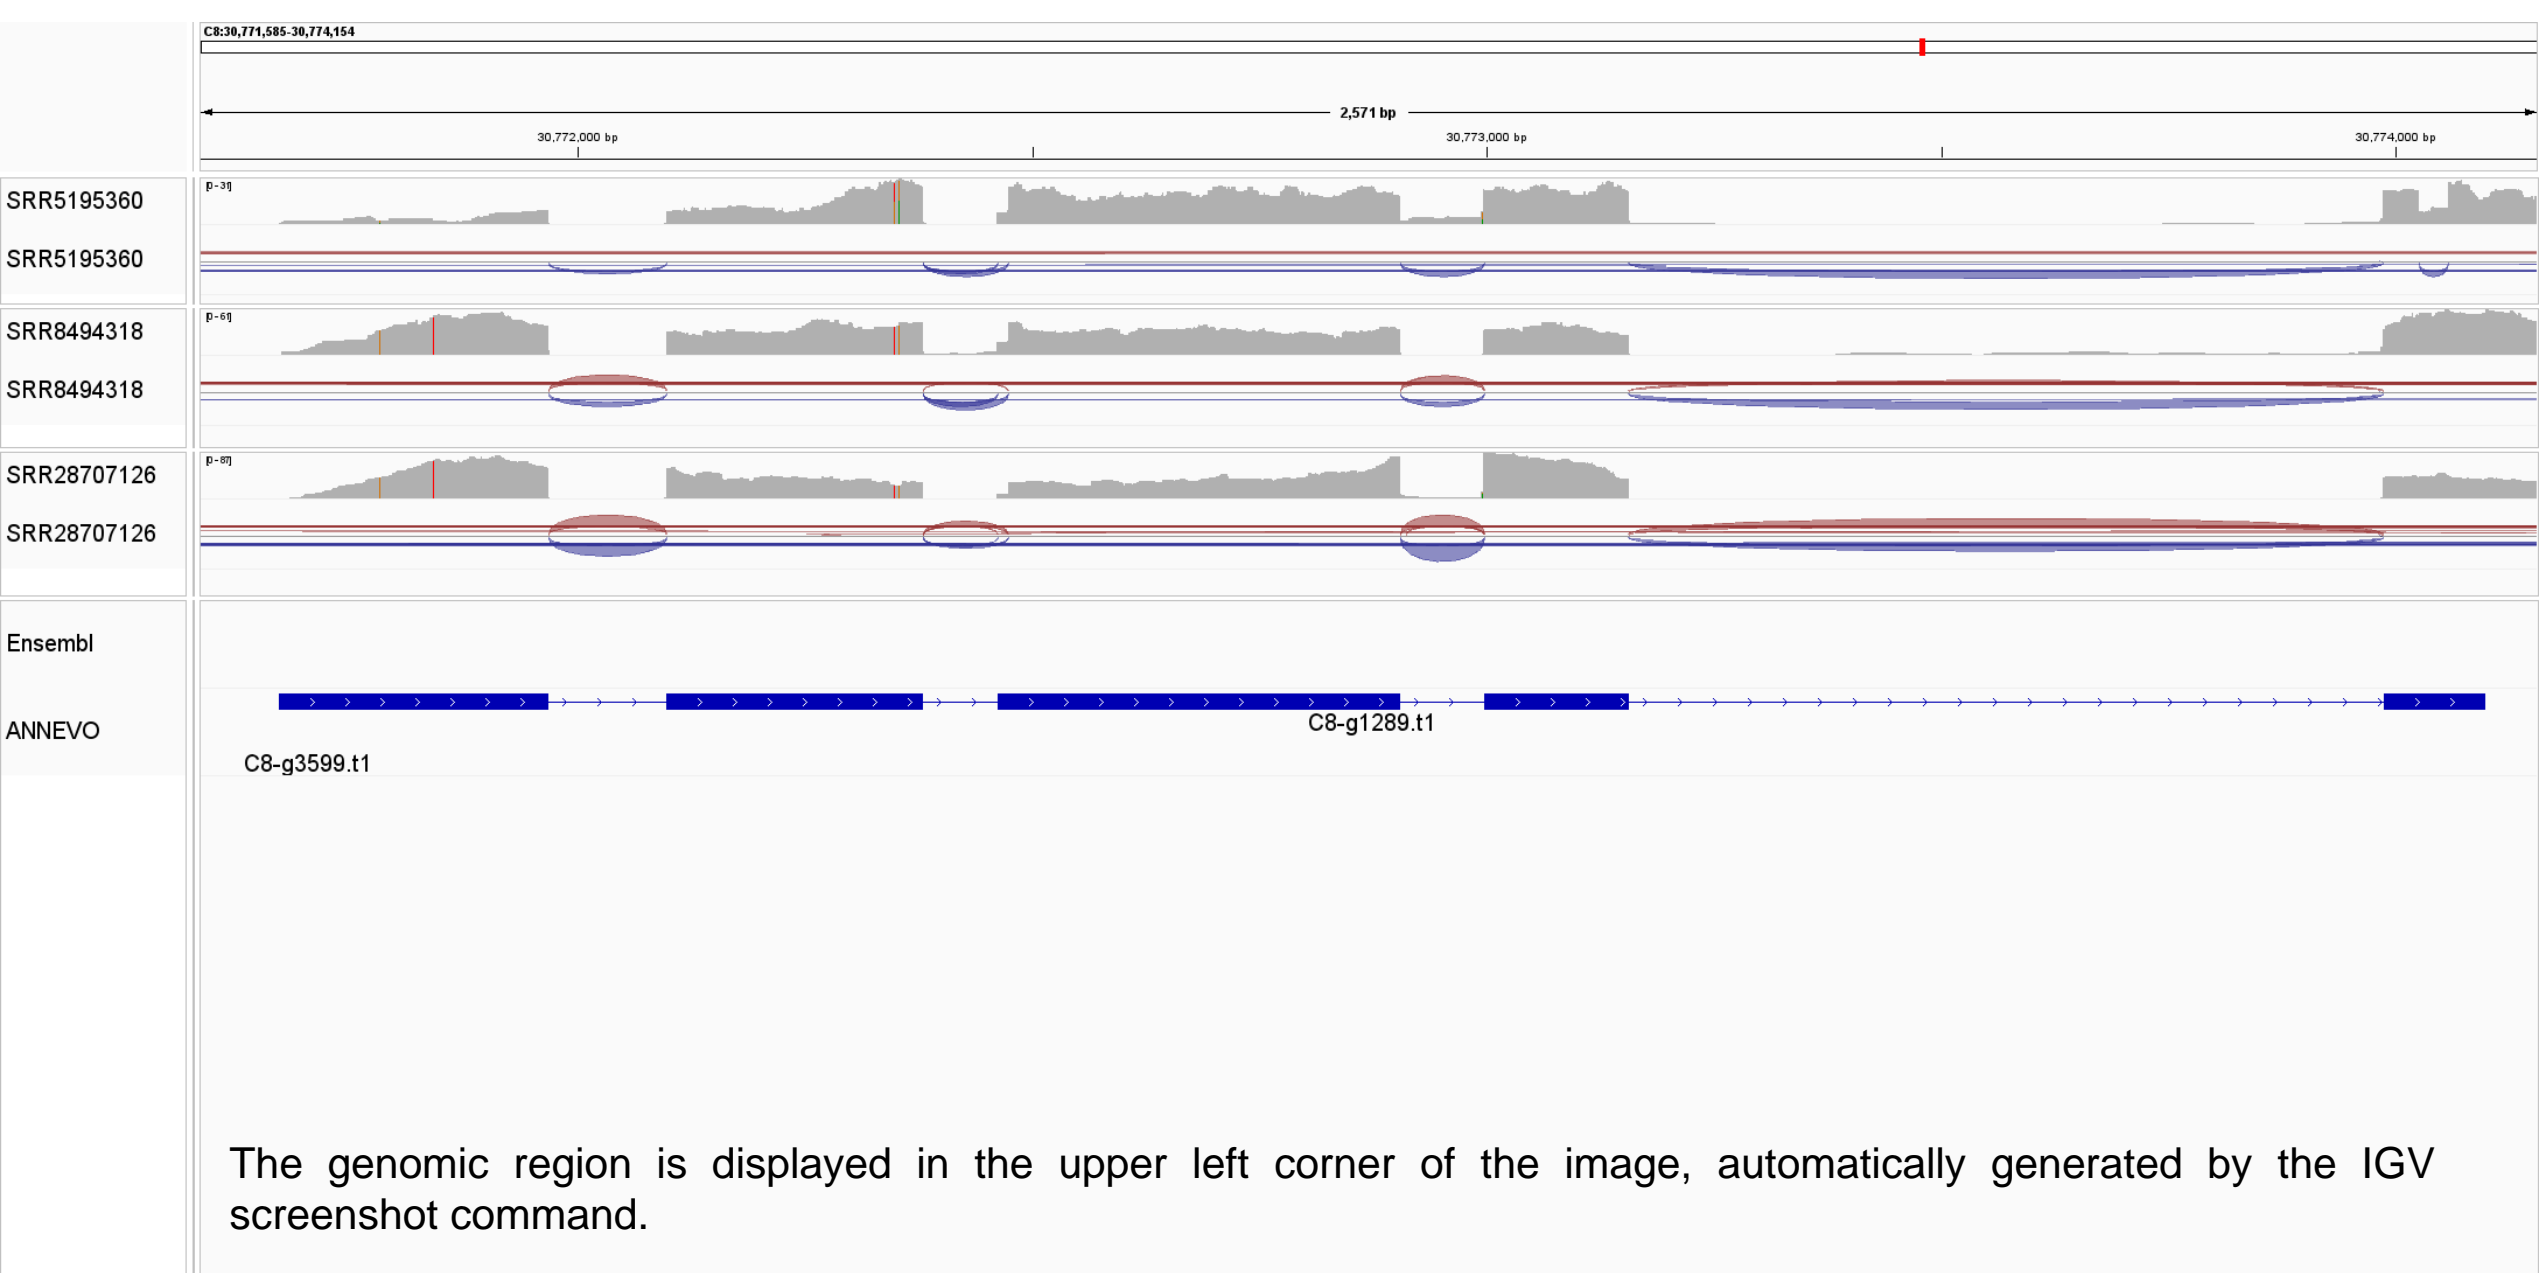

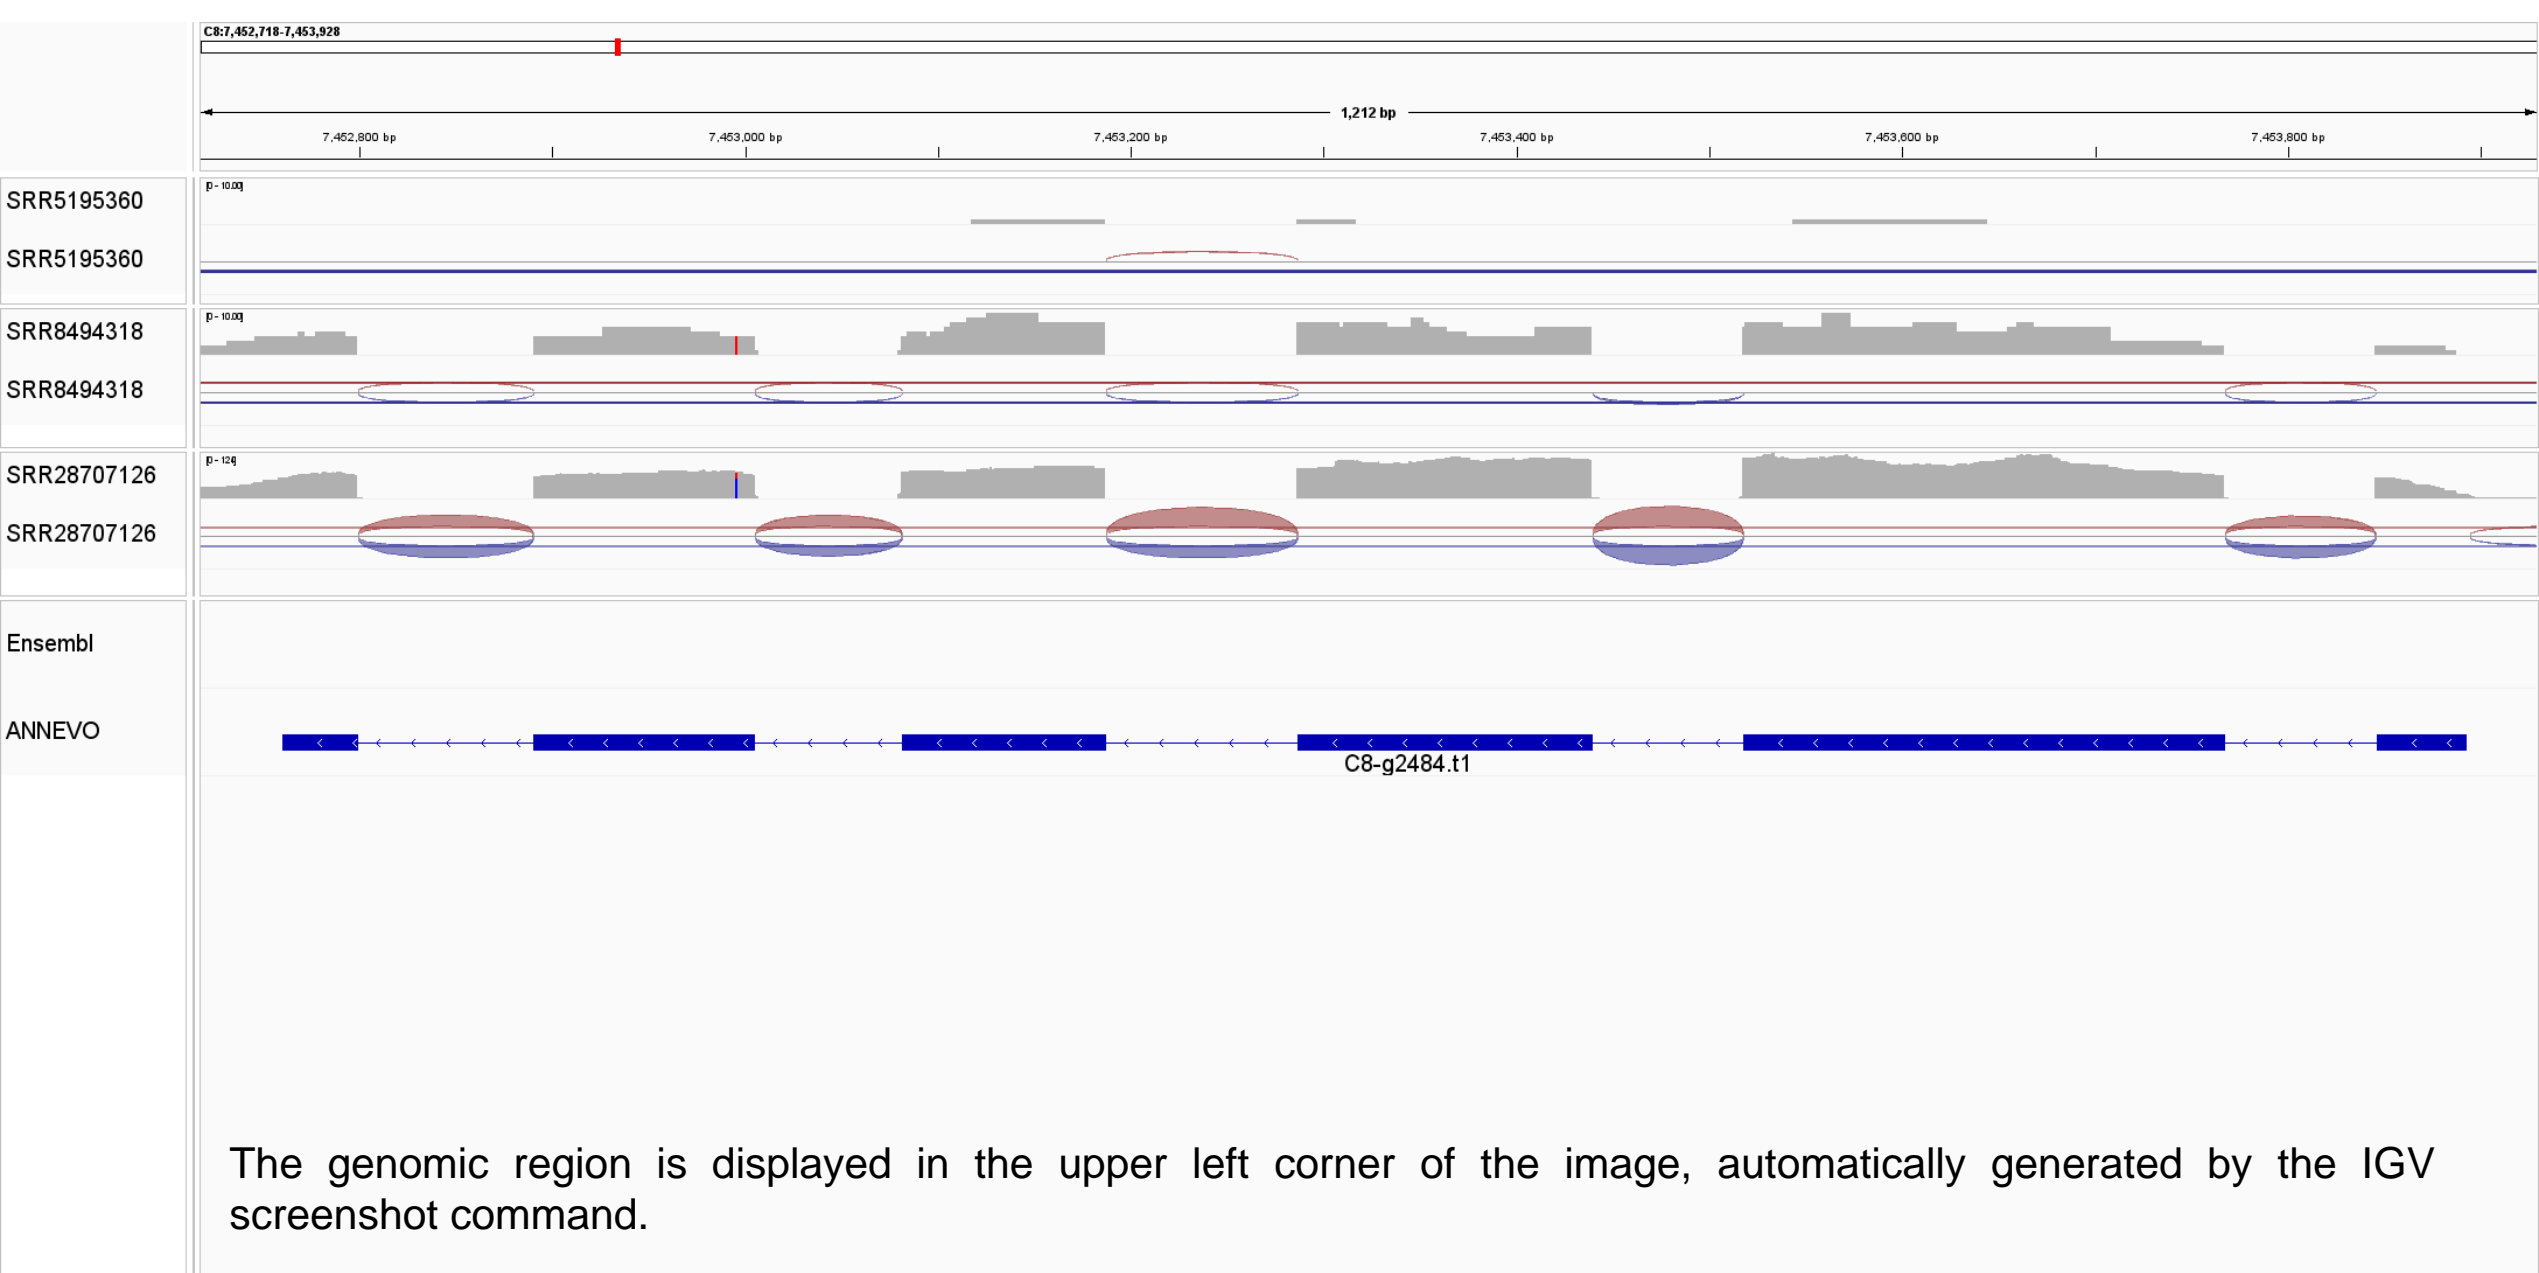

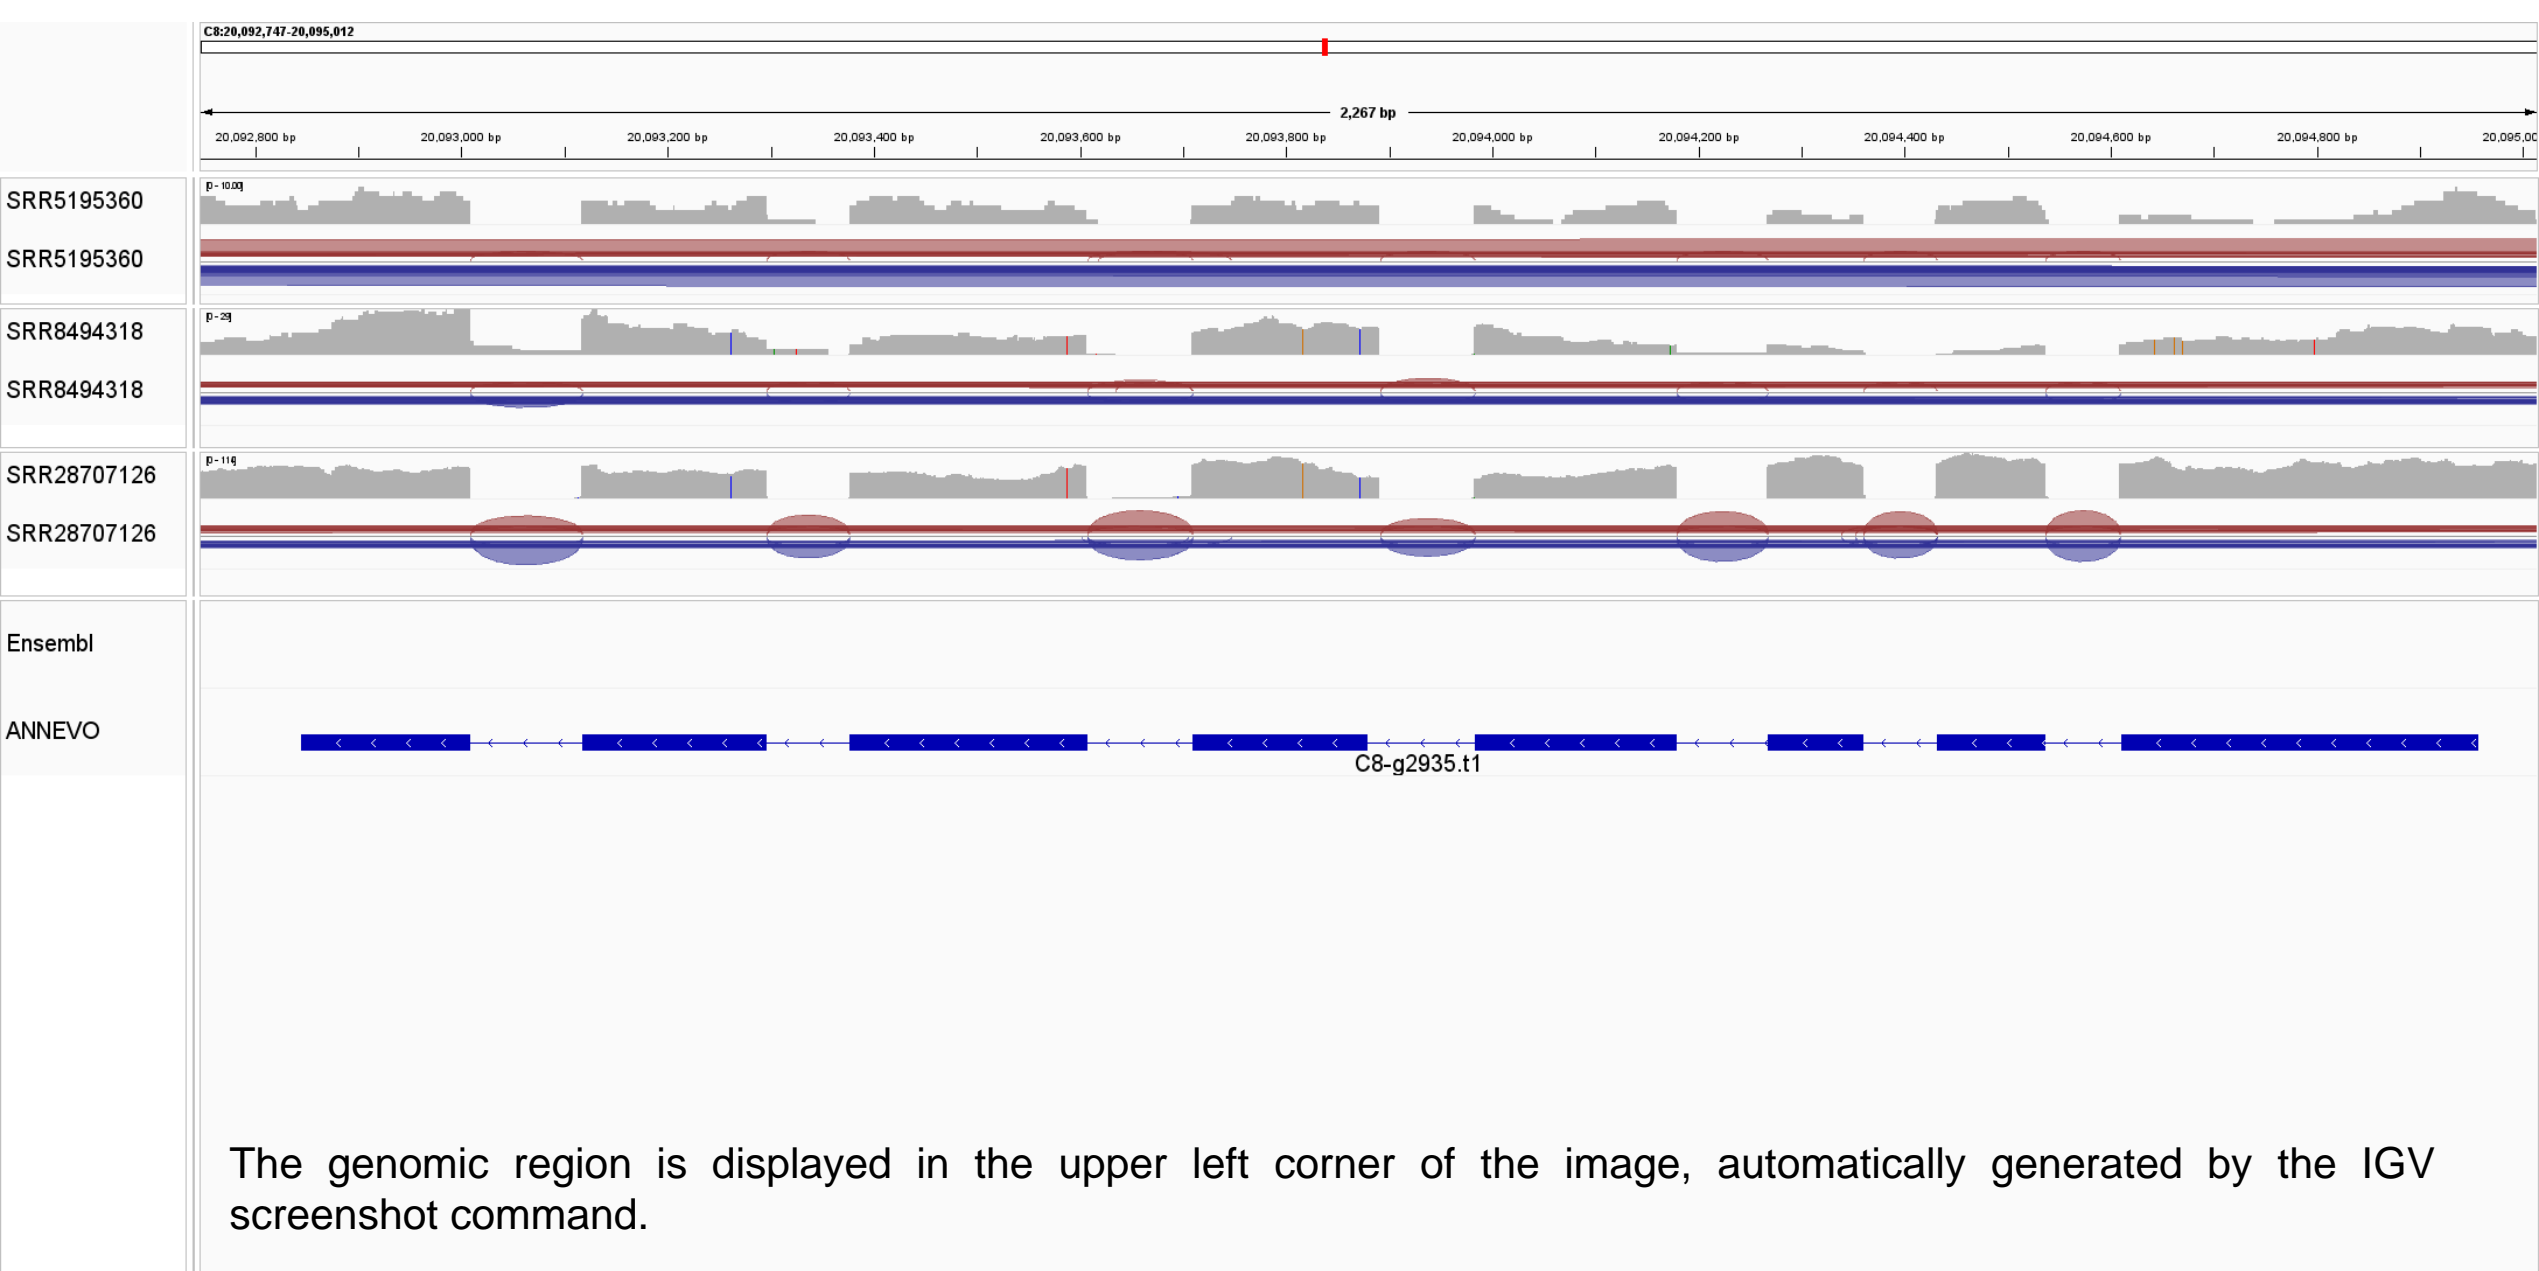

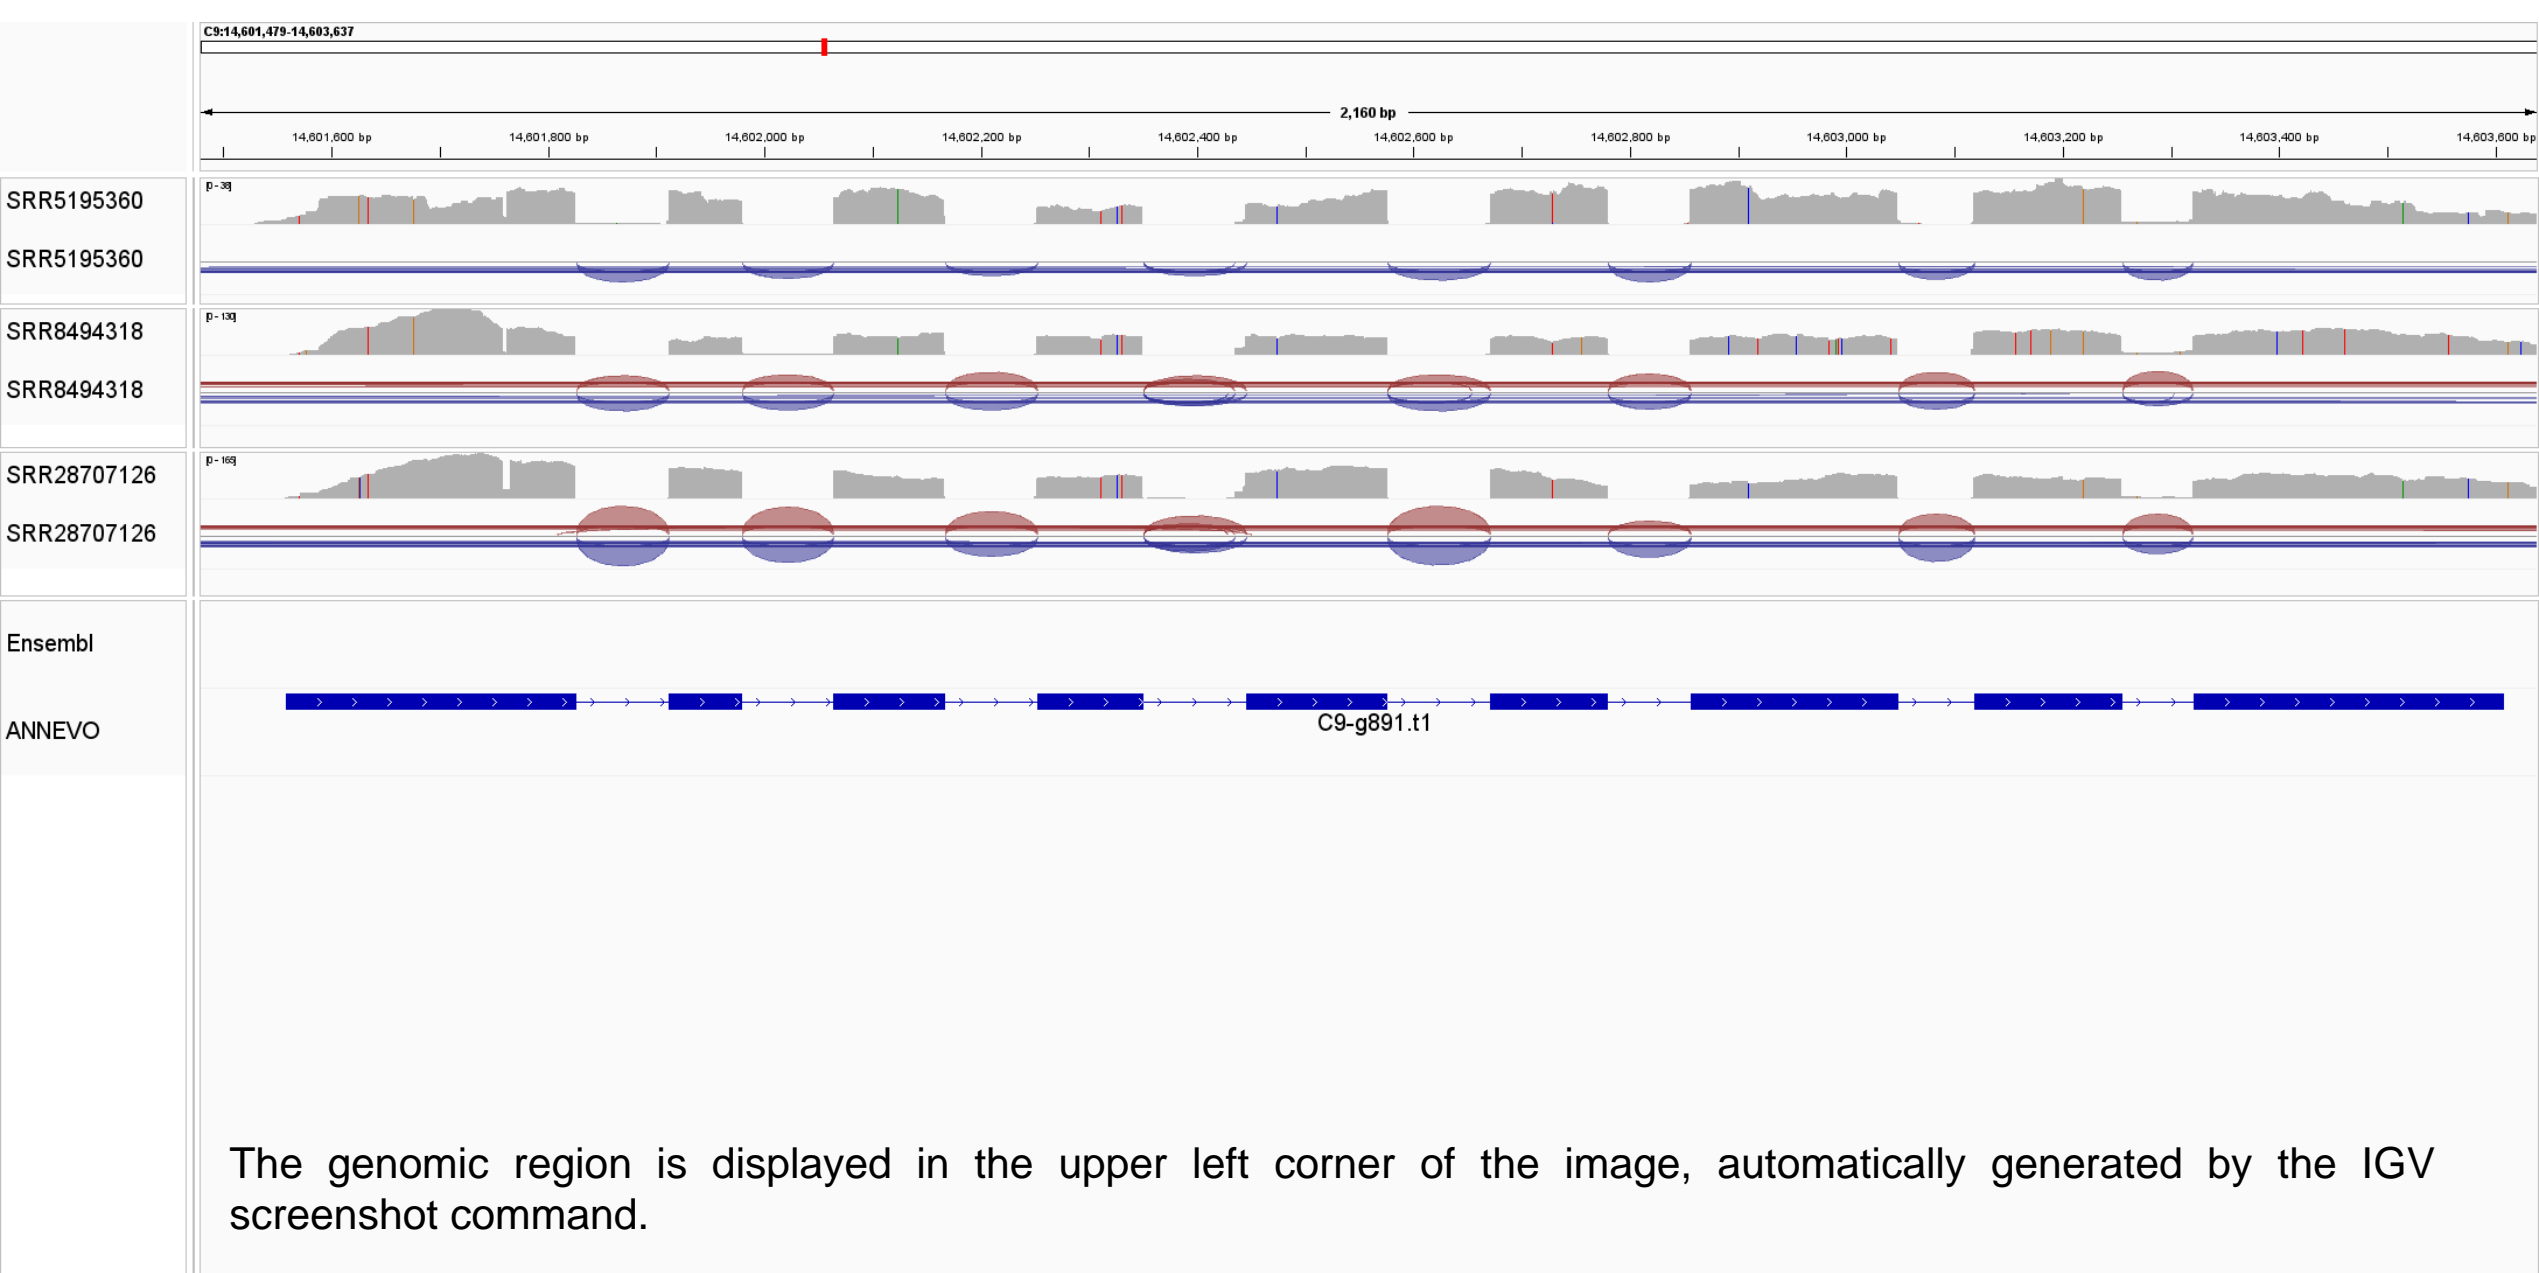

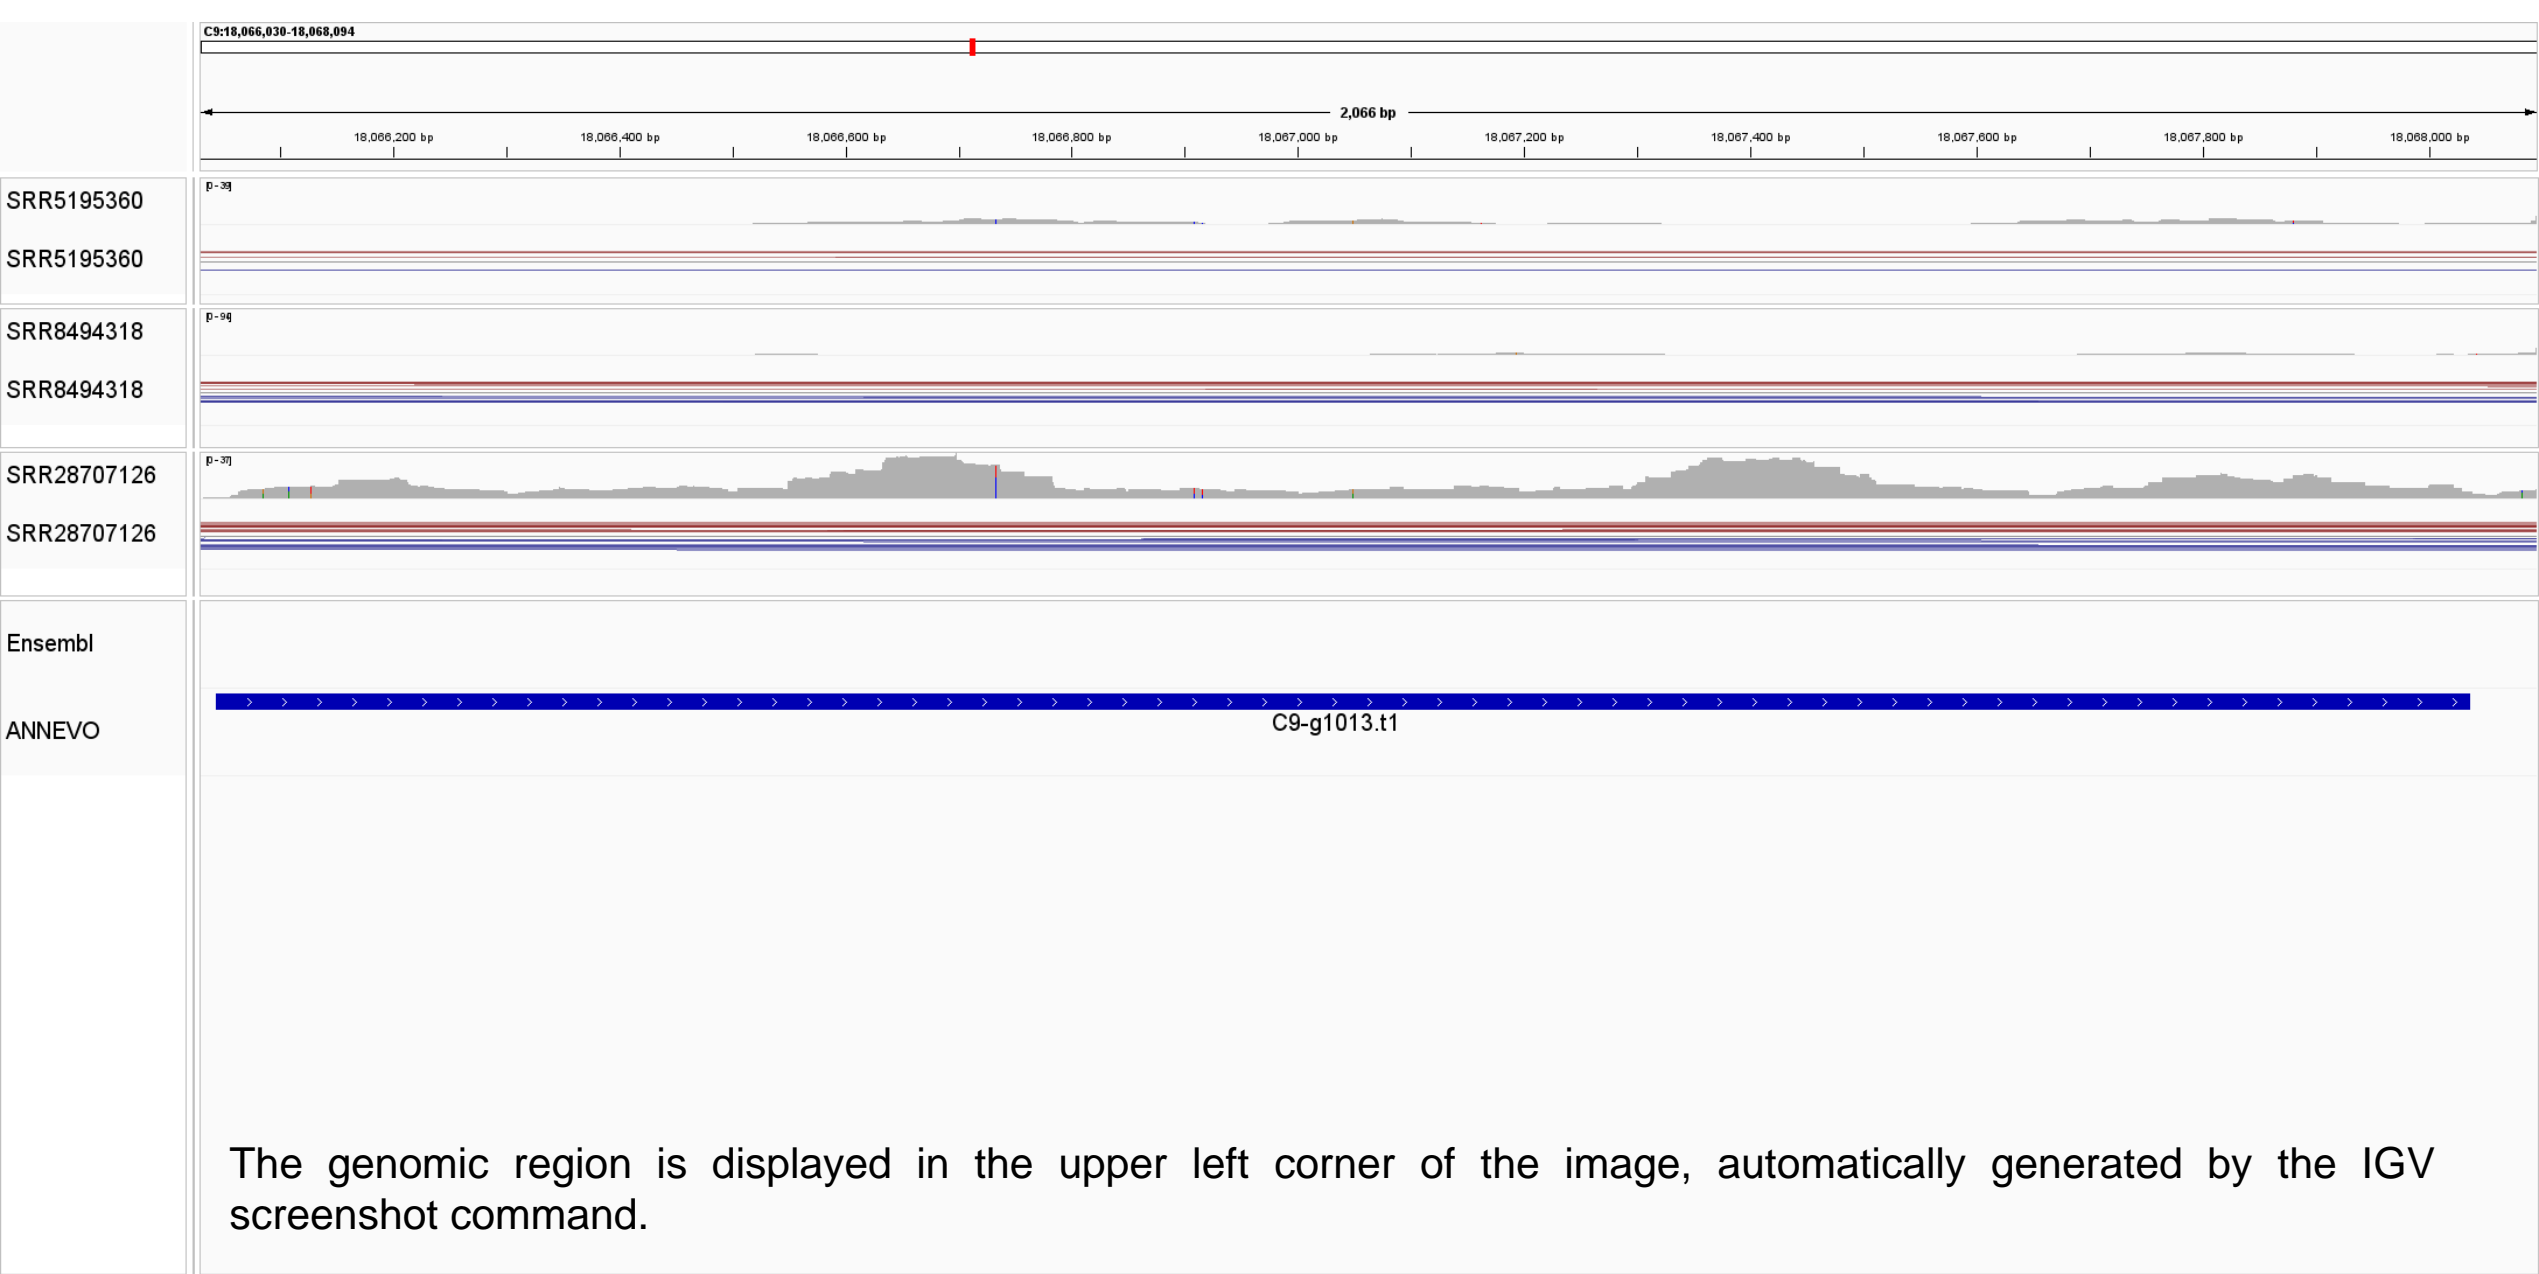

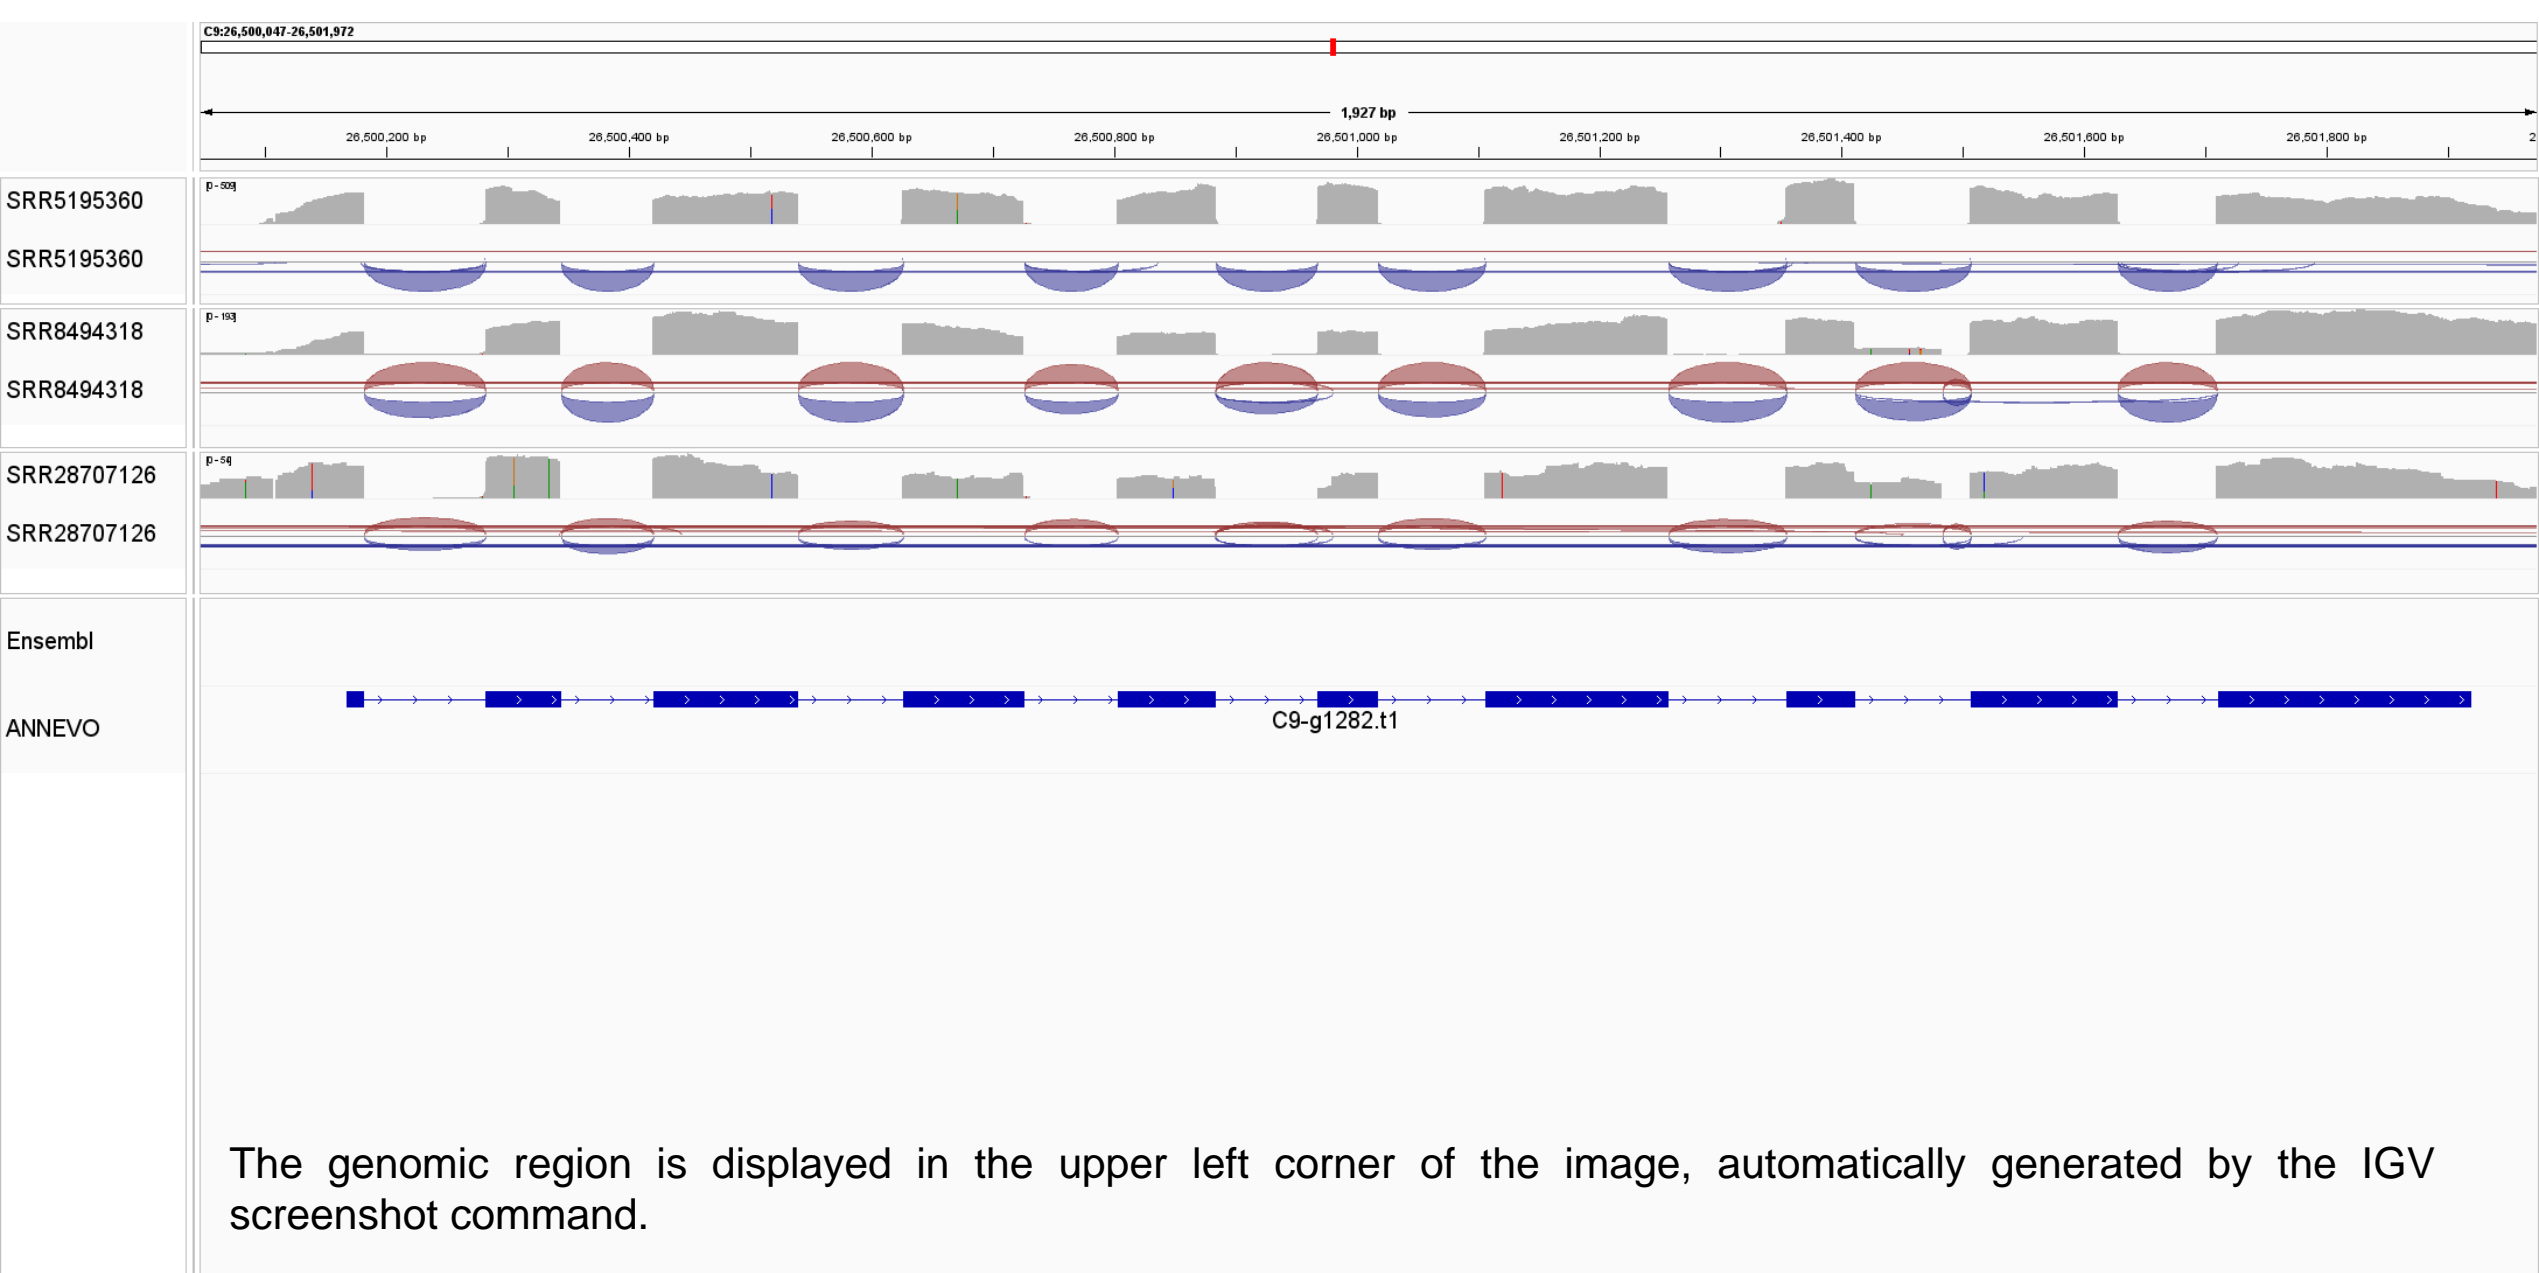

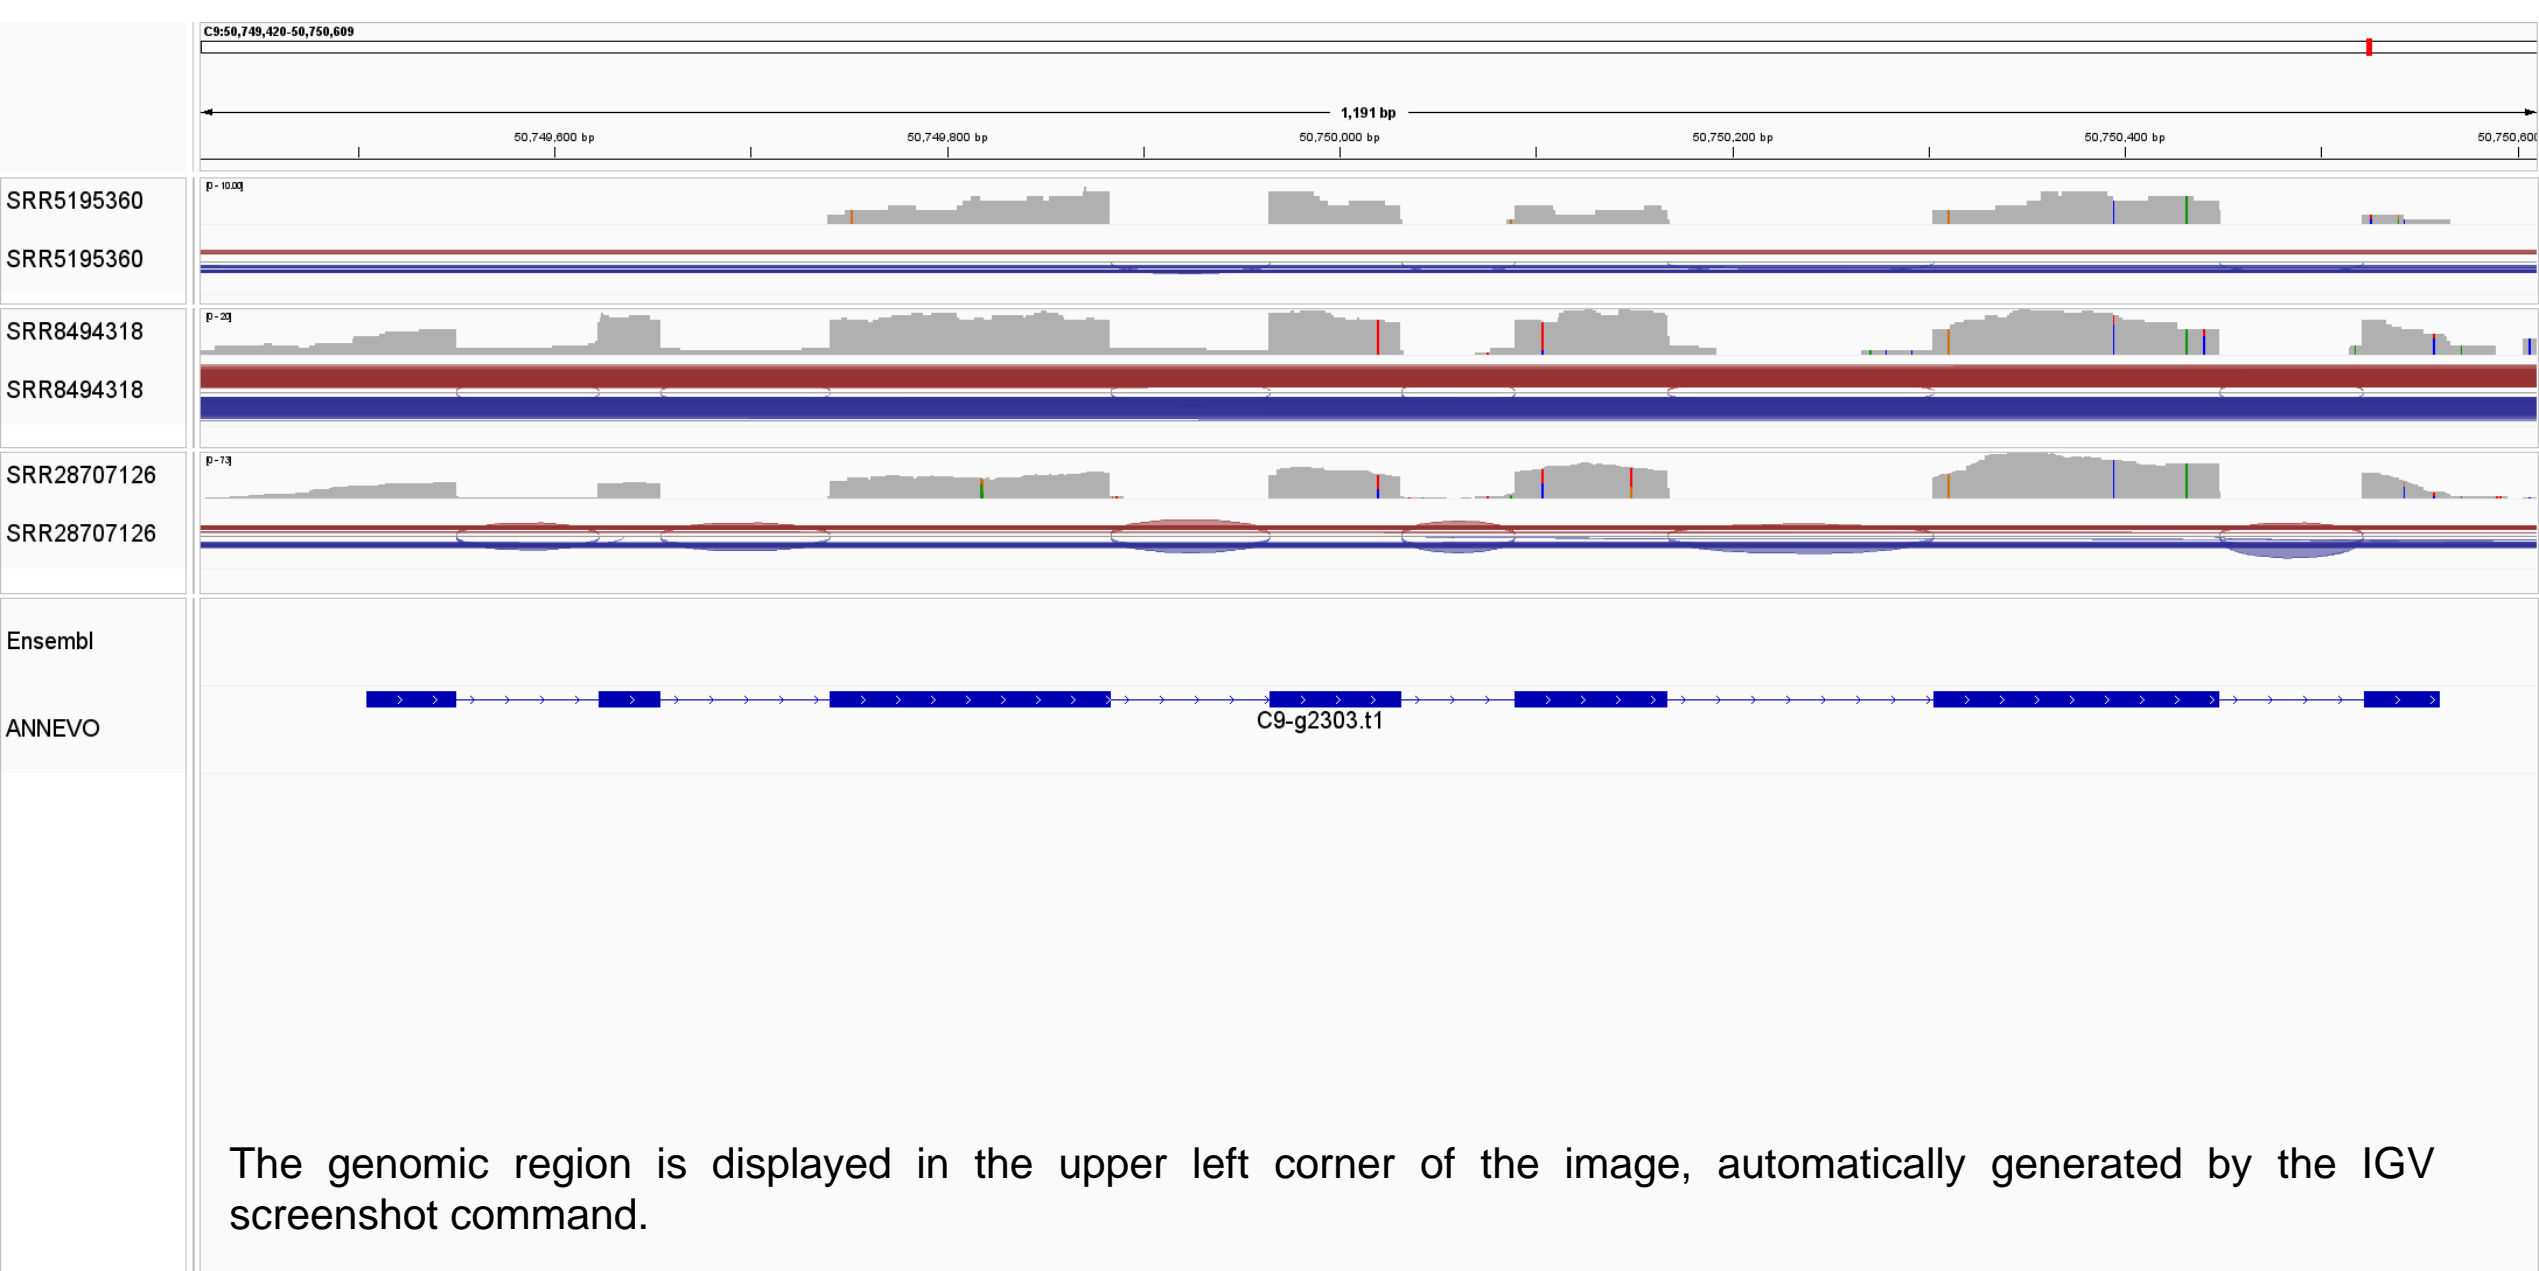

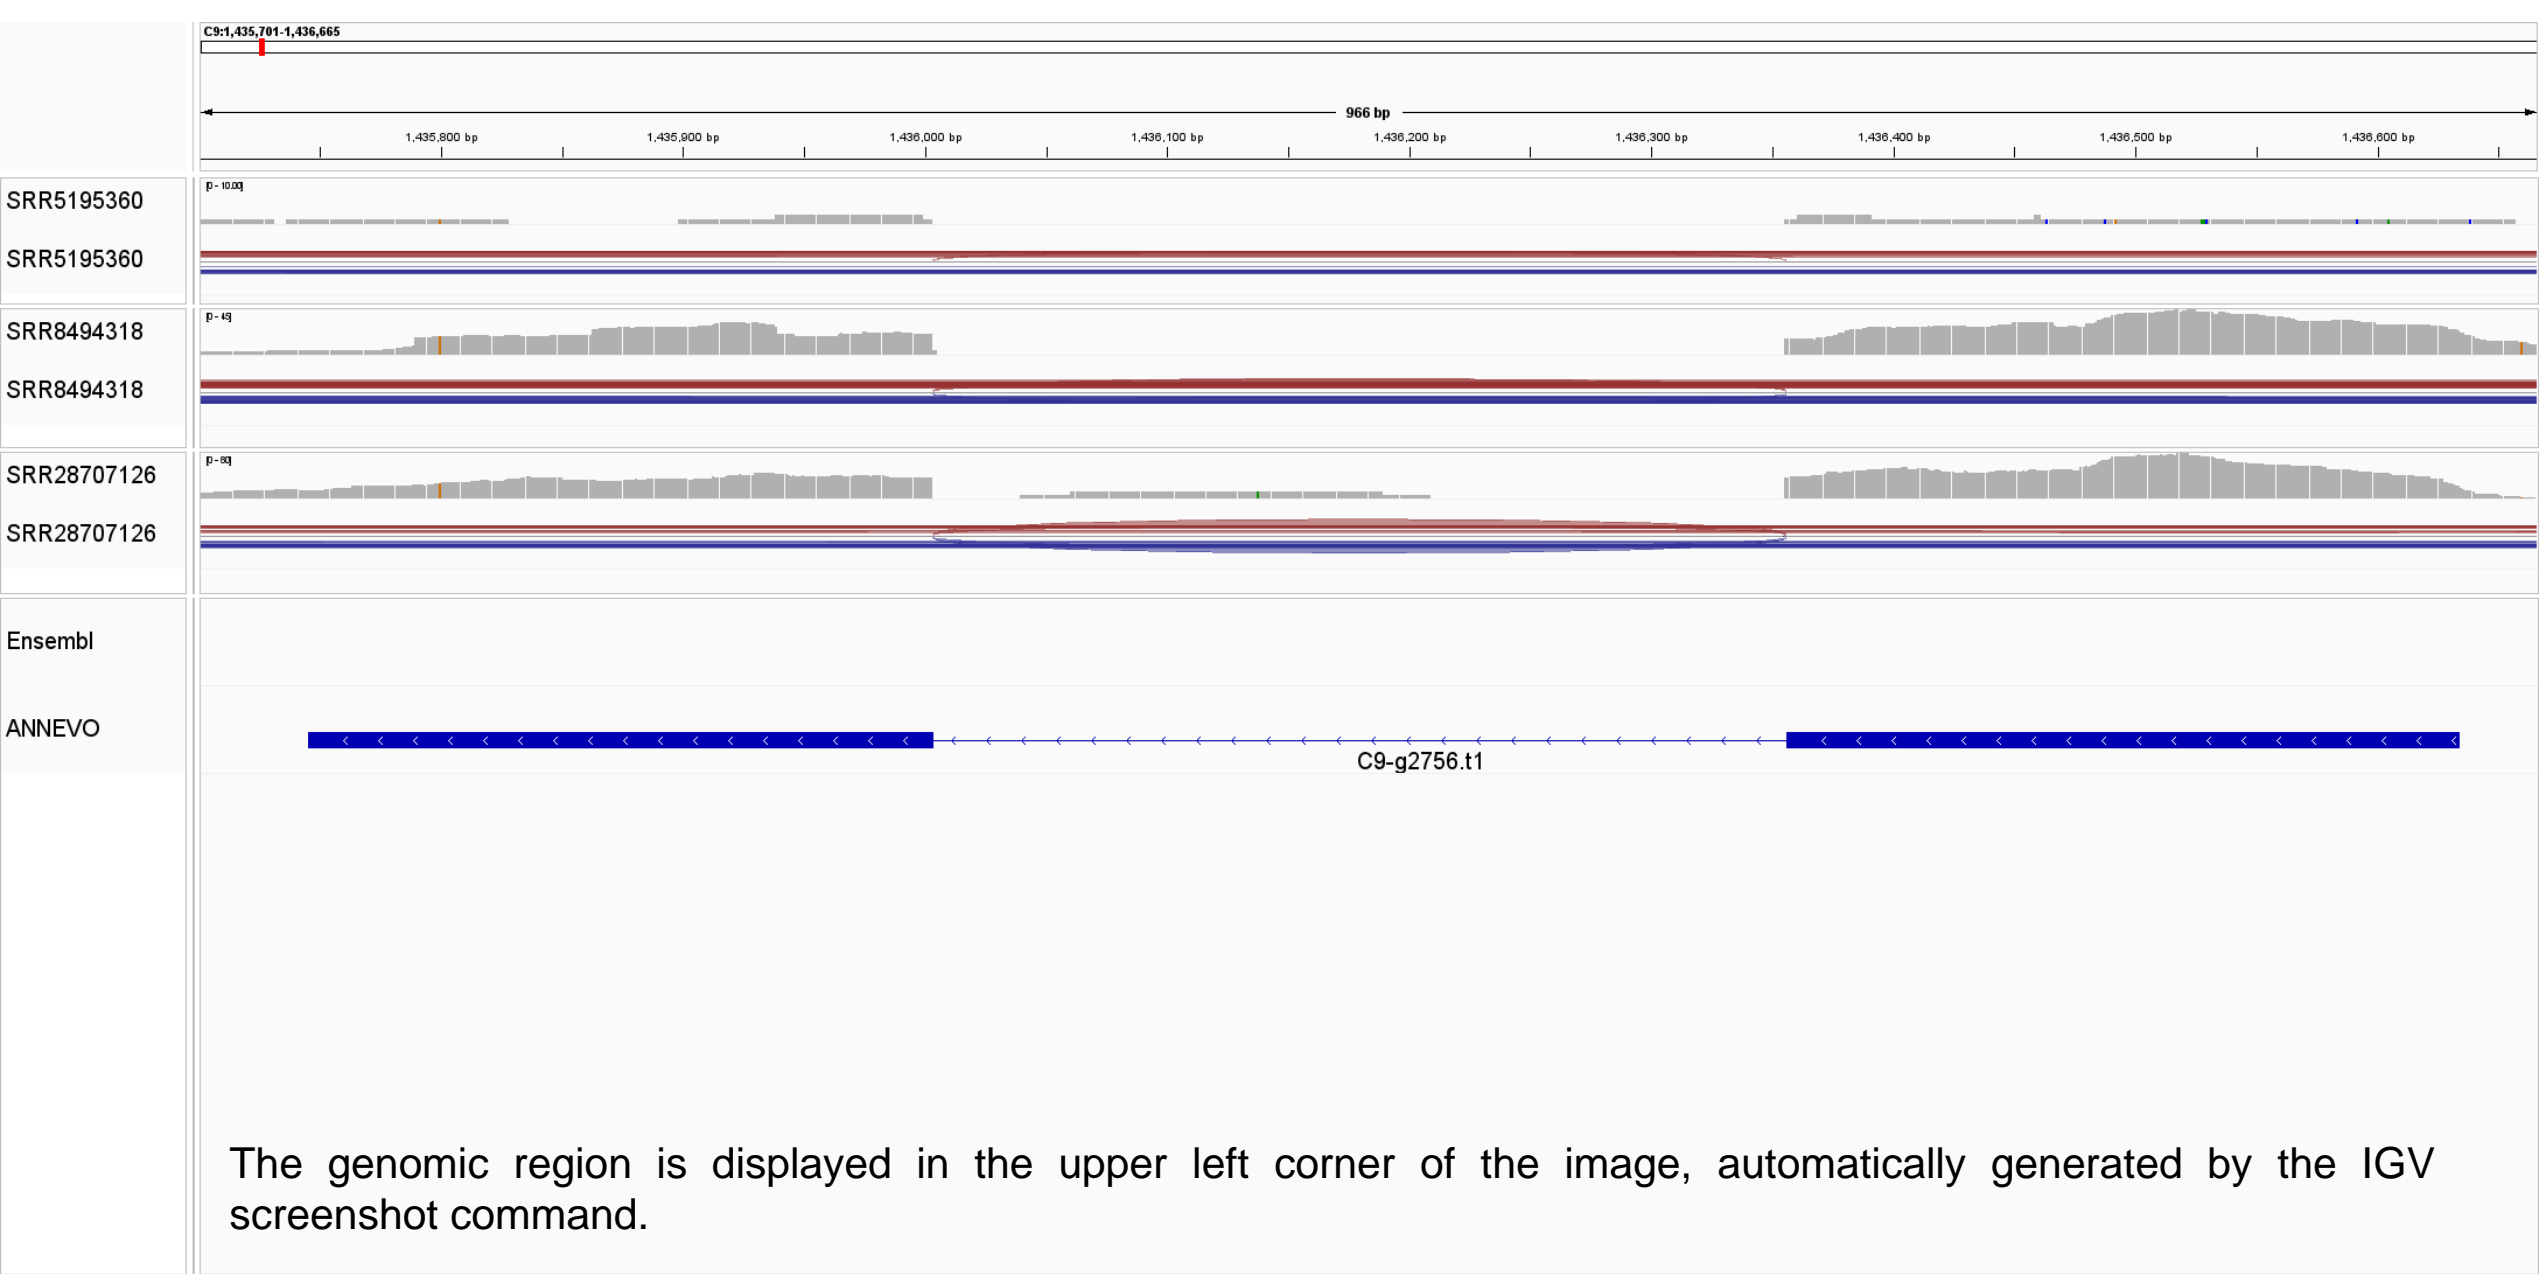



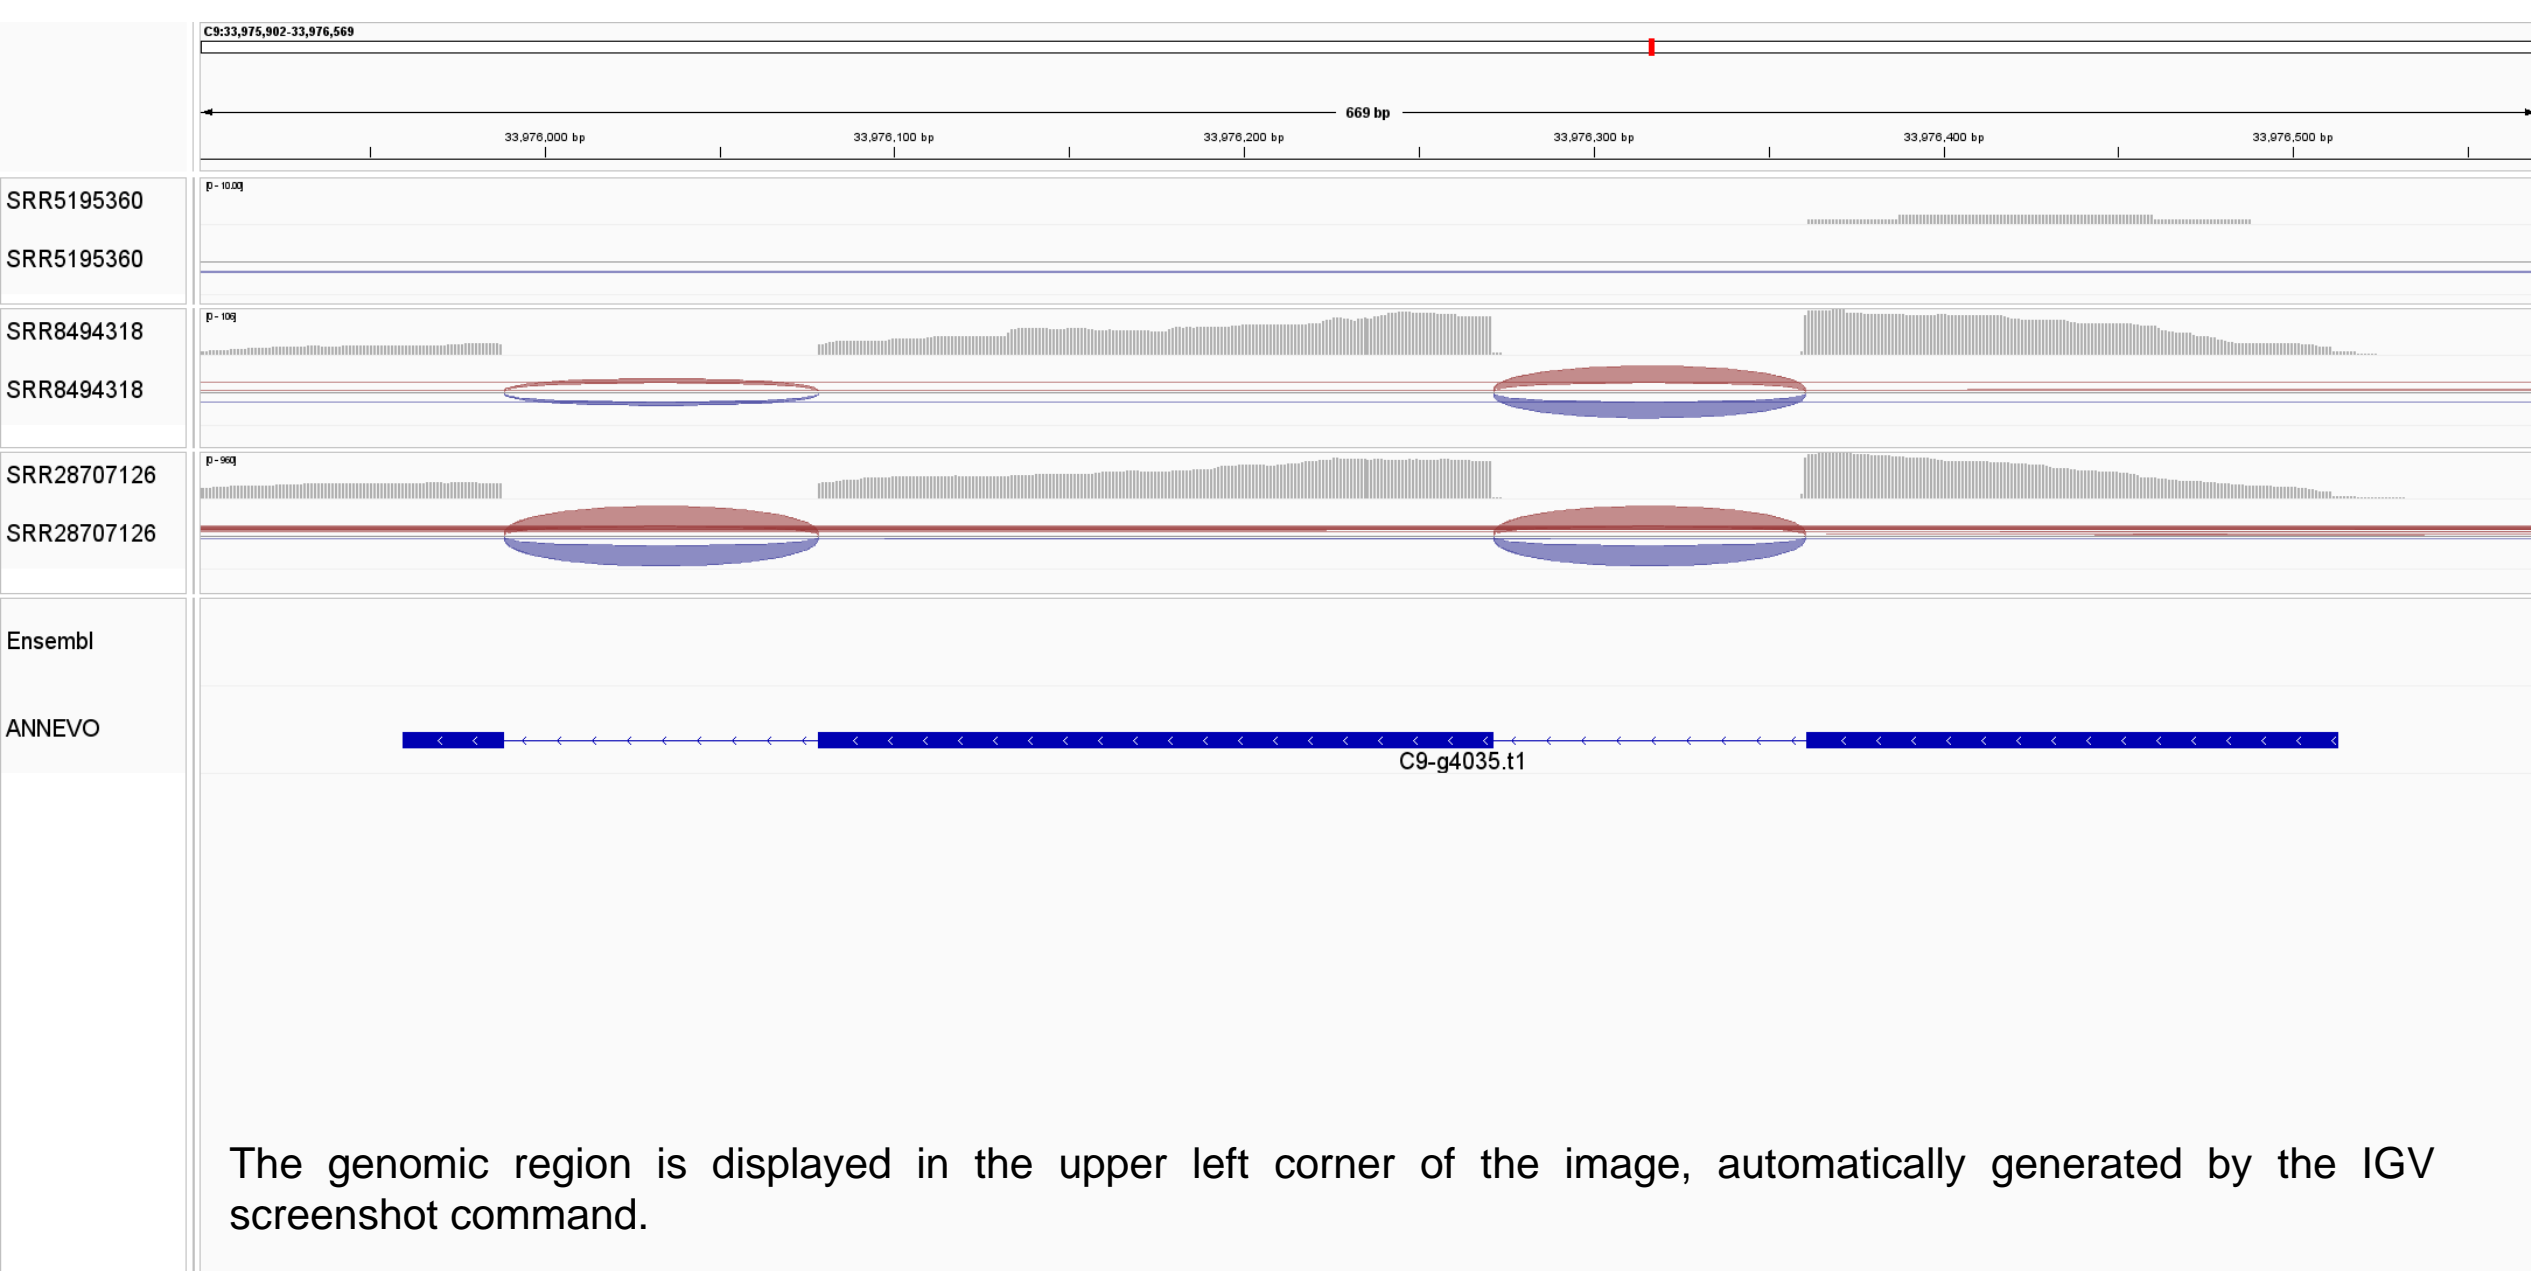

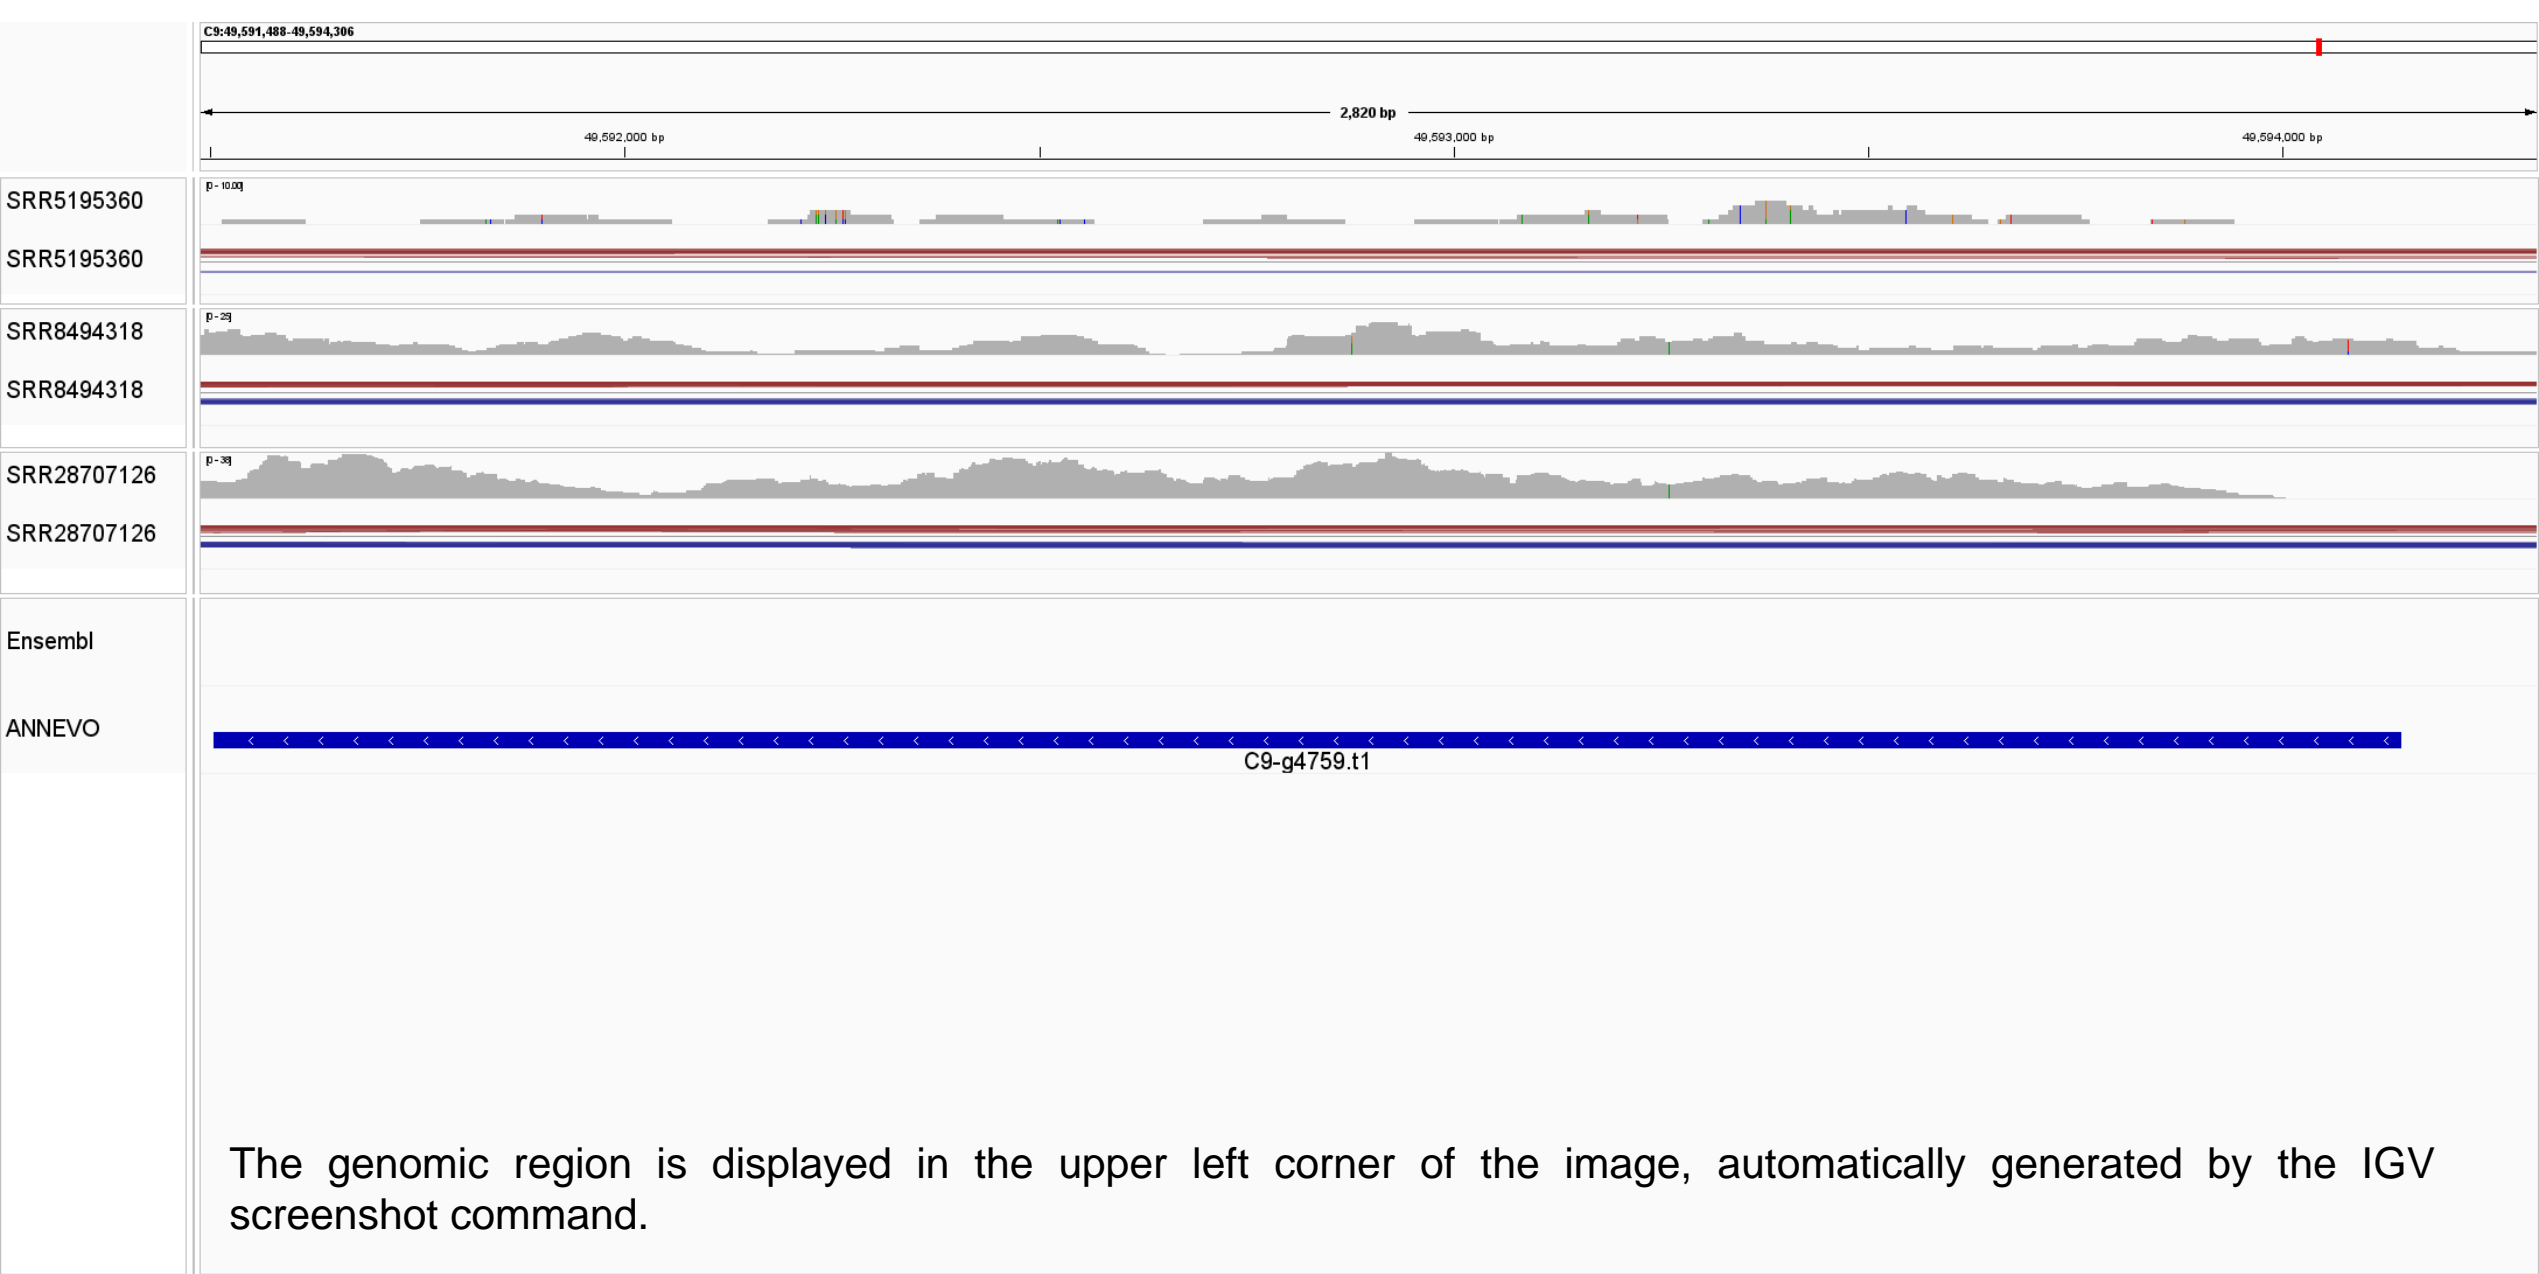

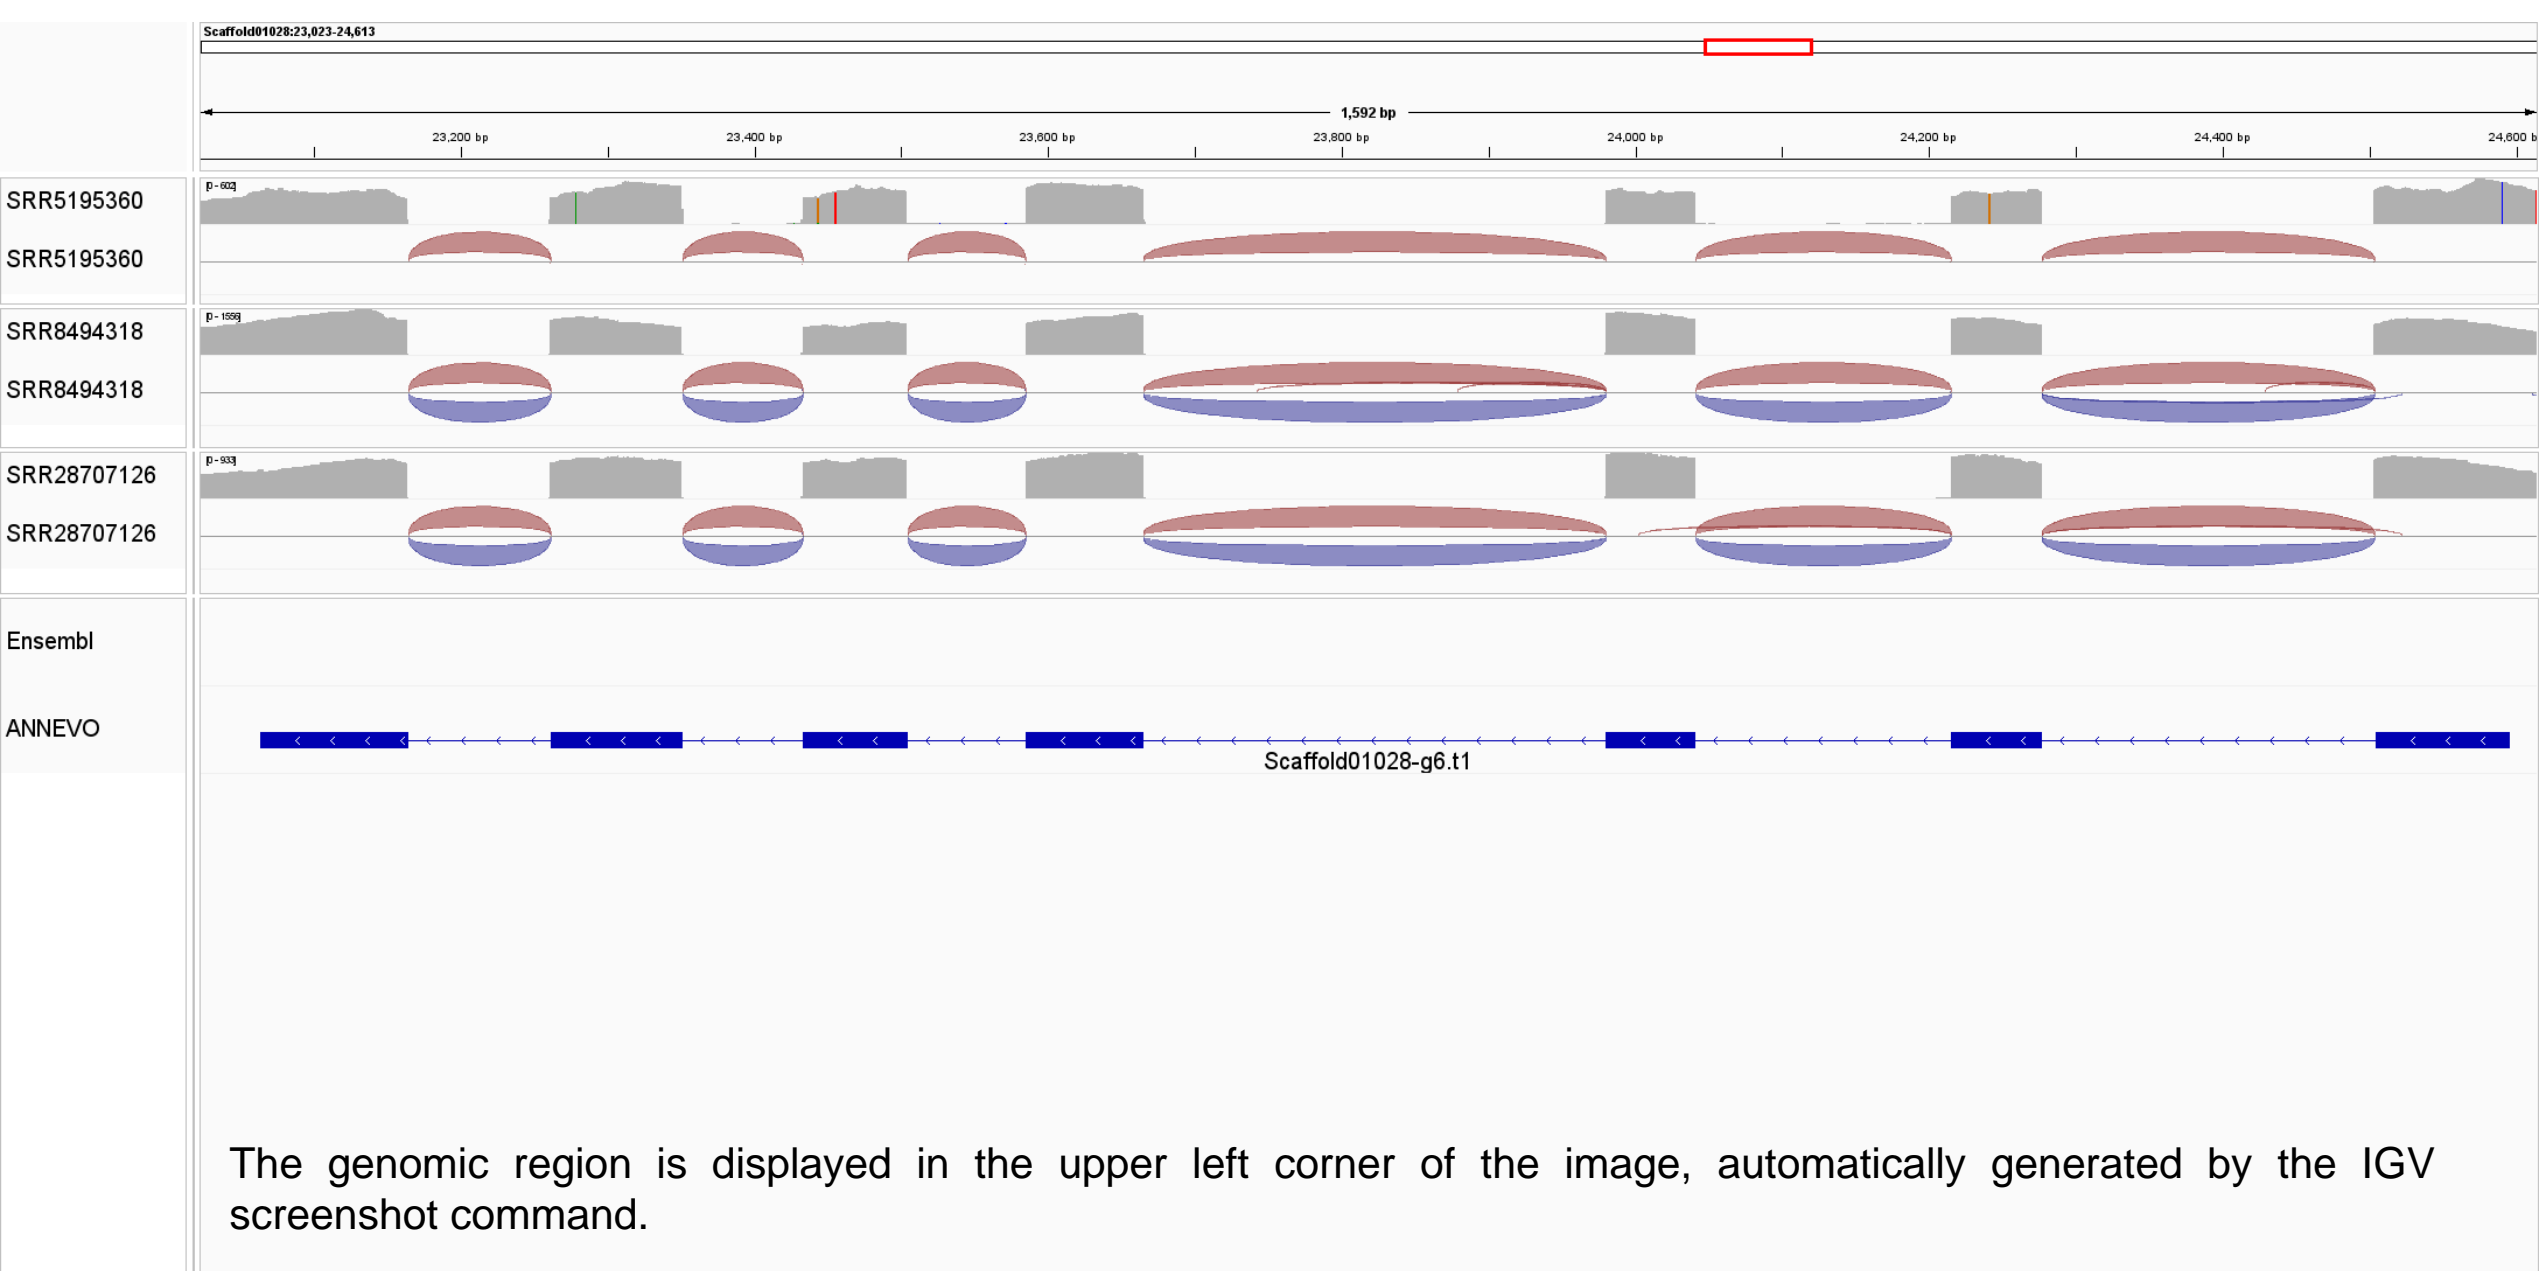

Incomplete Gene in Ensembl

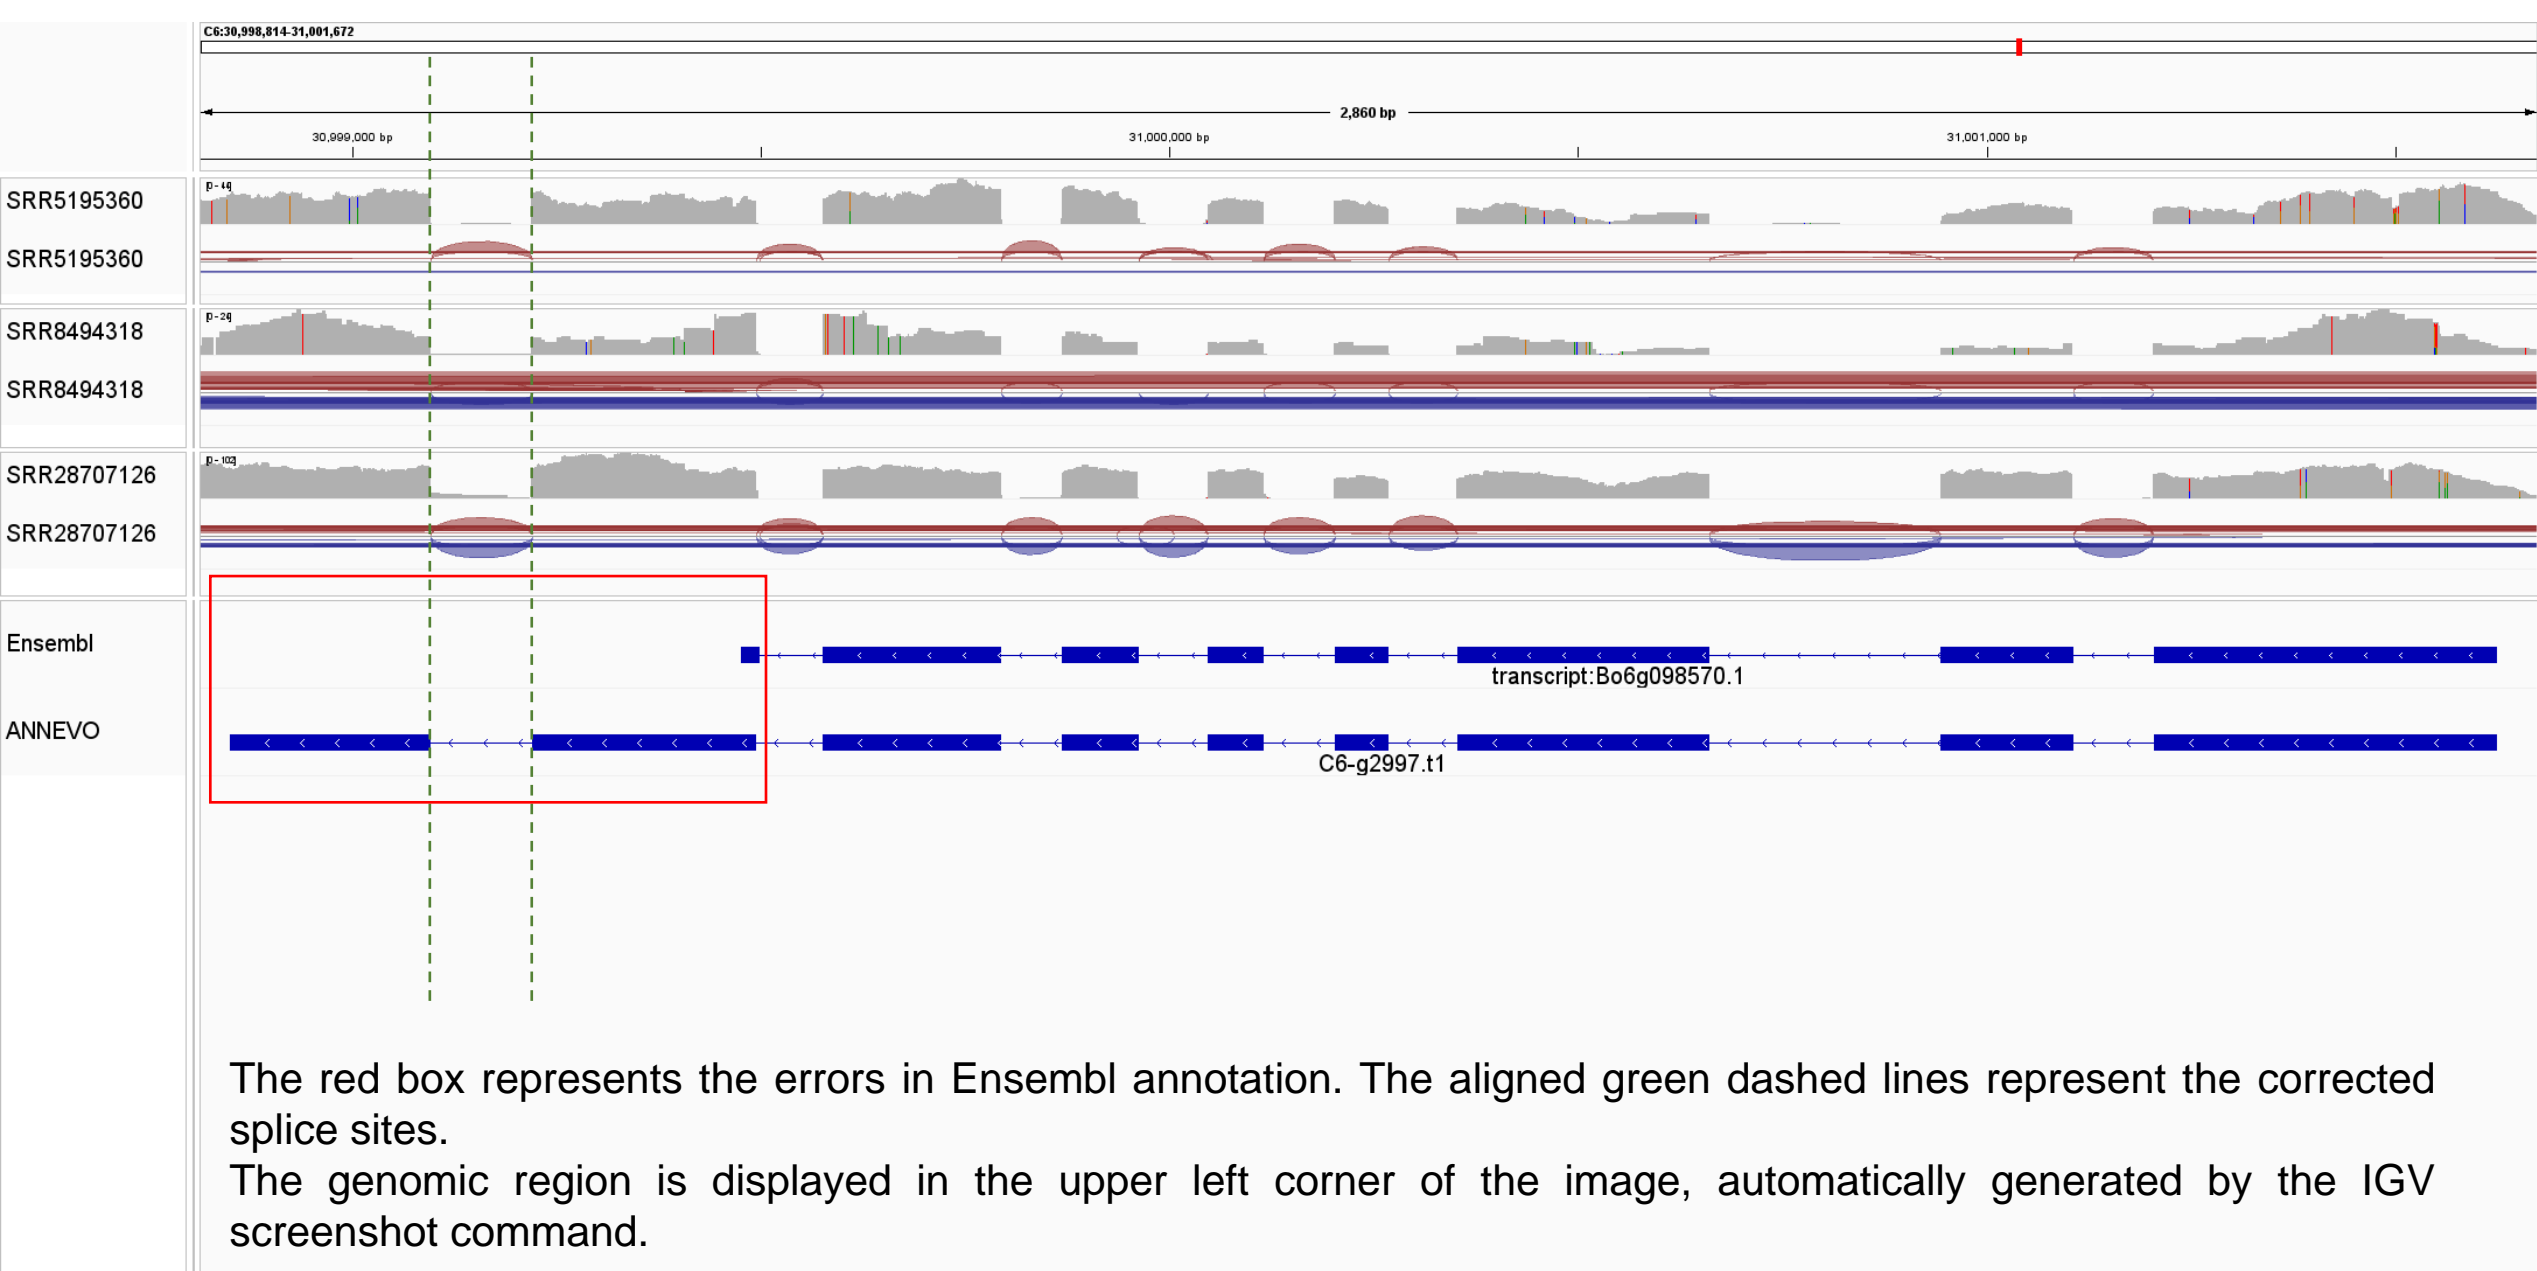

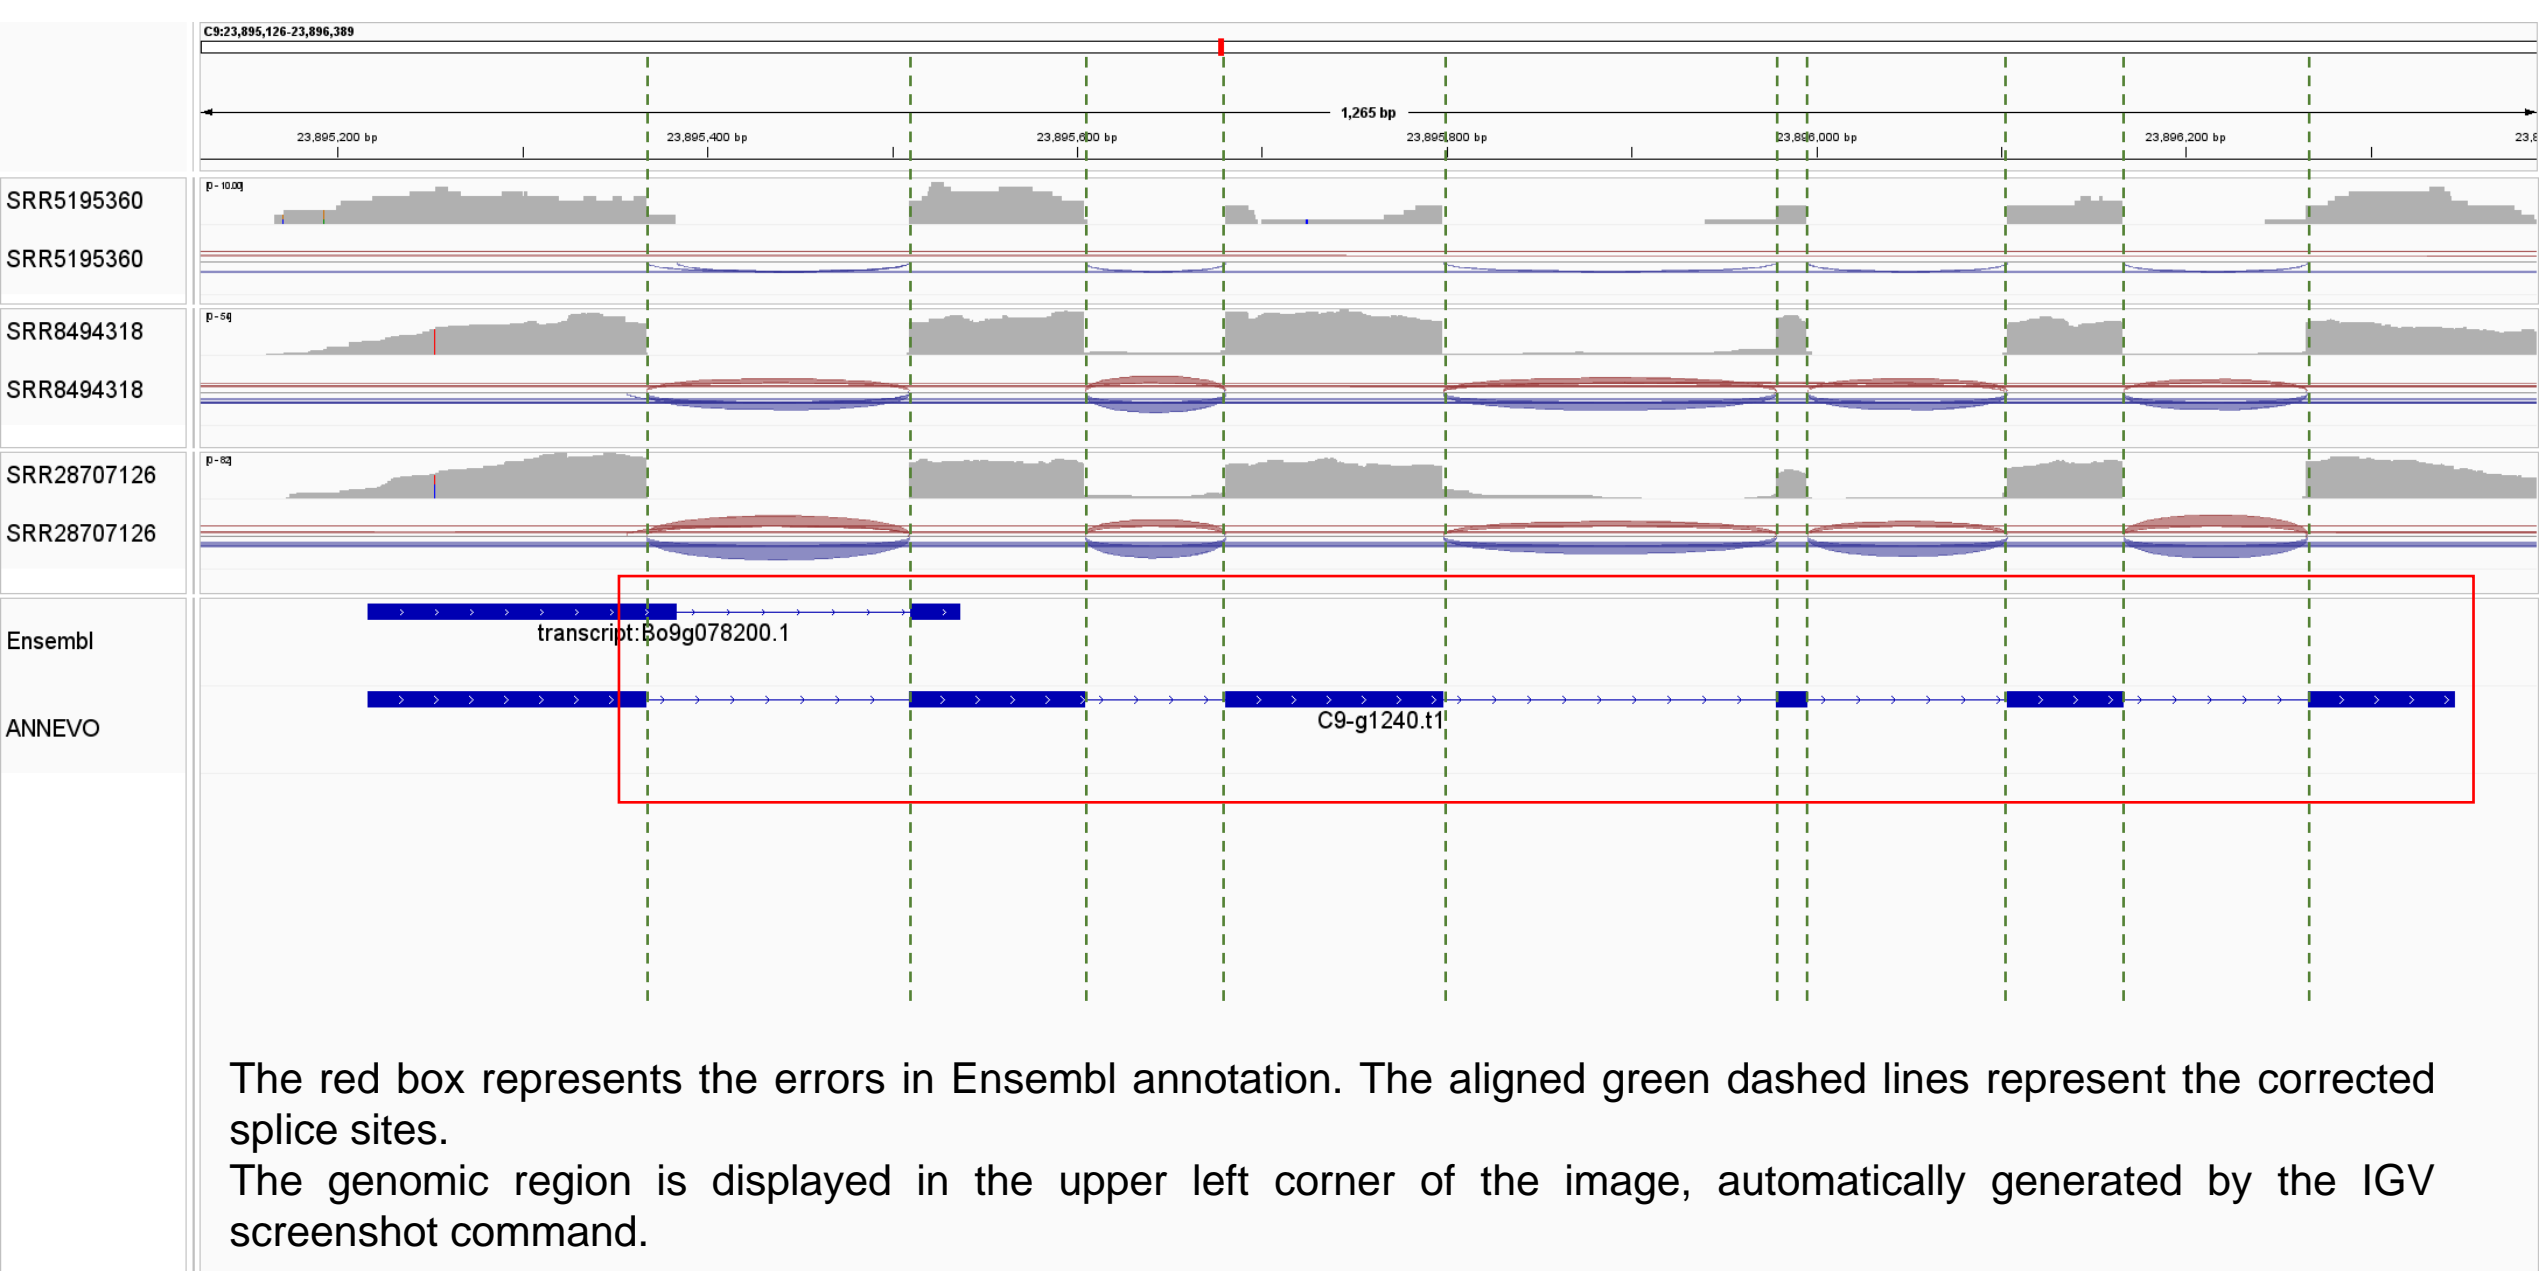

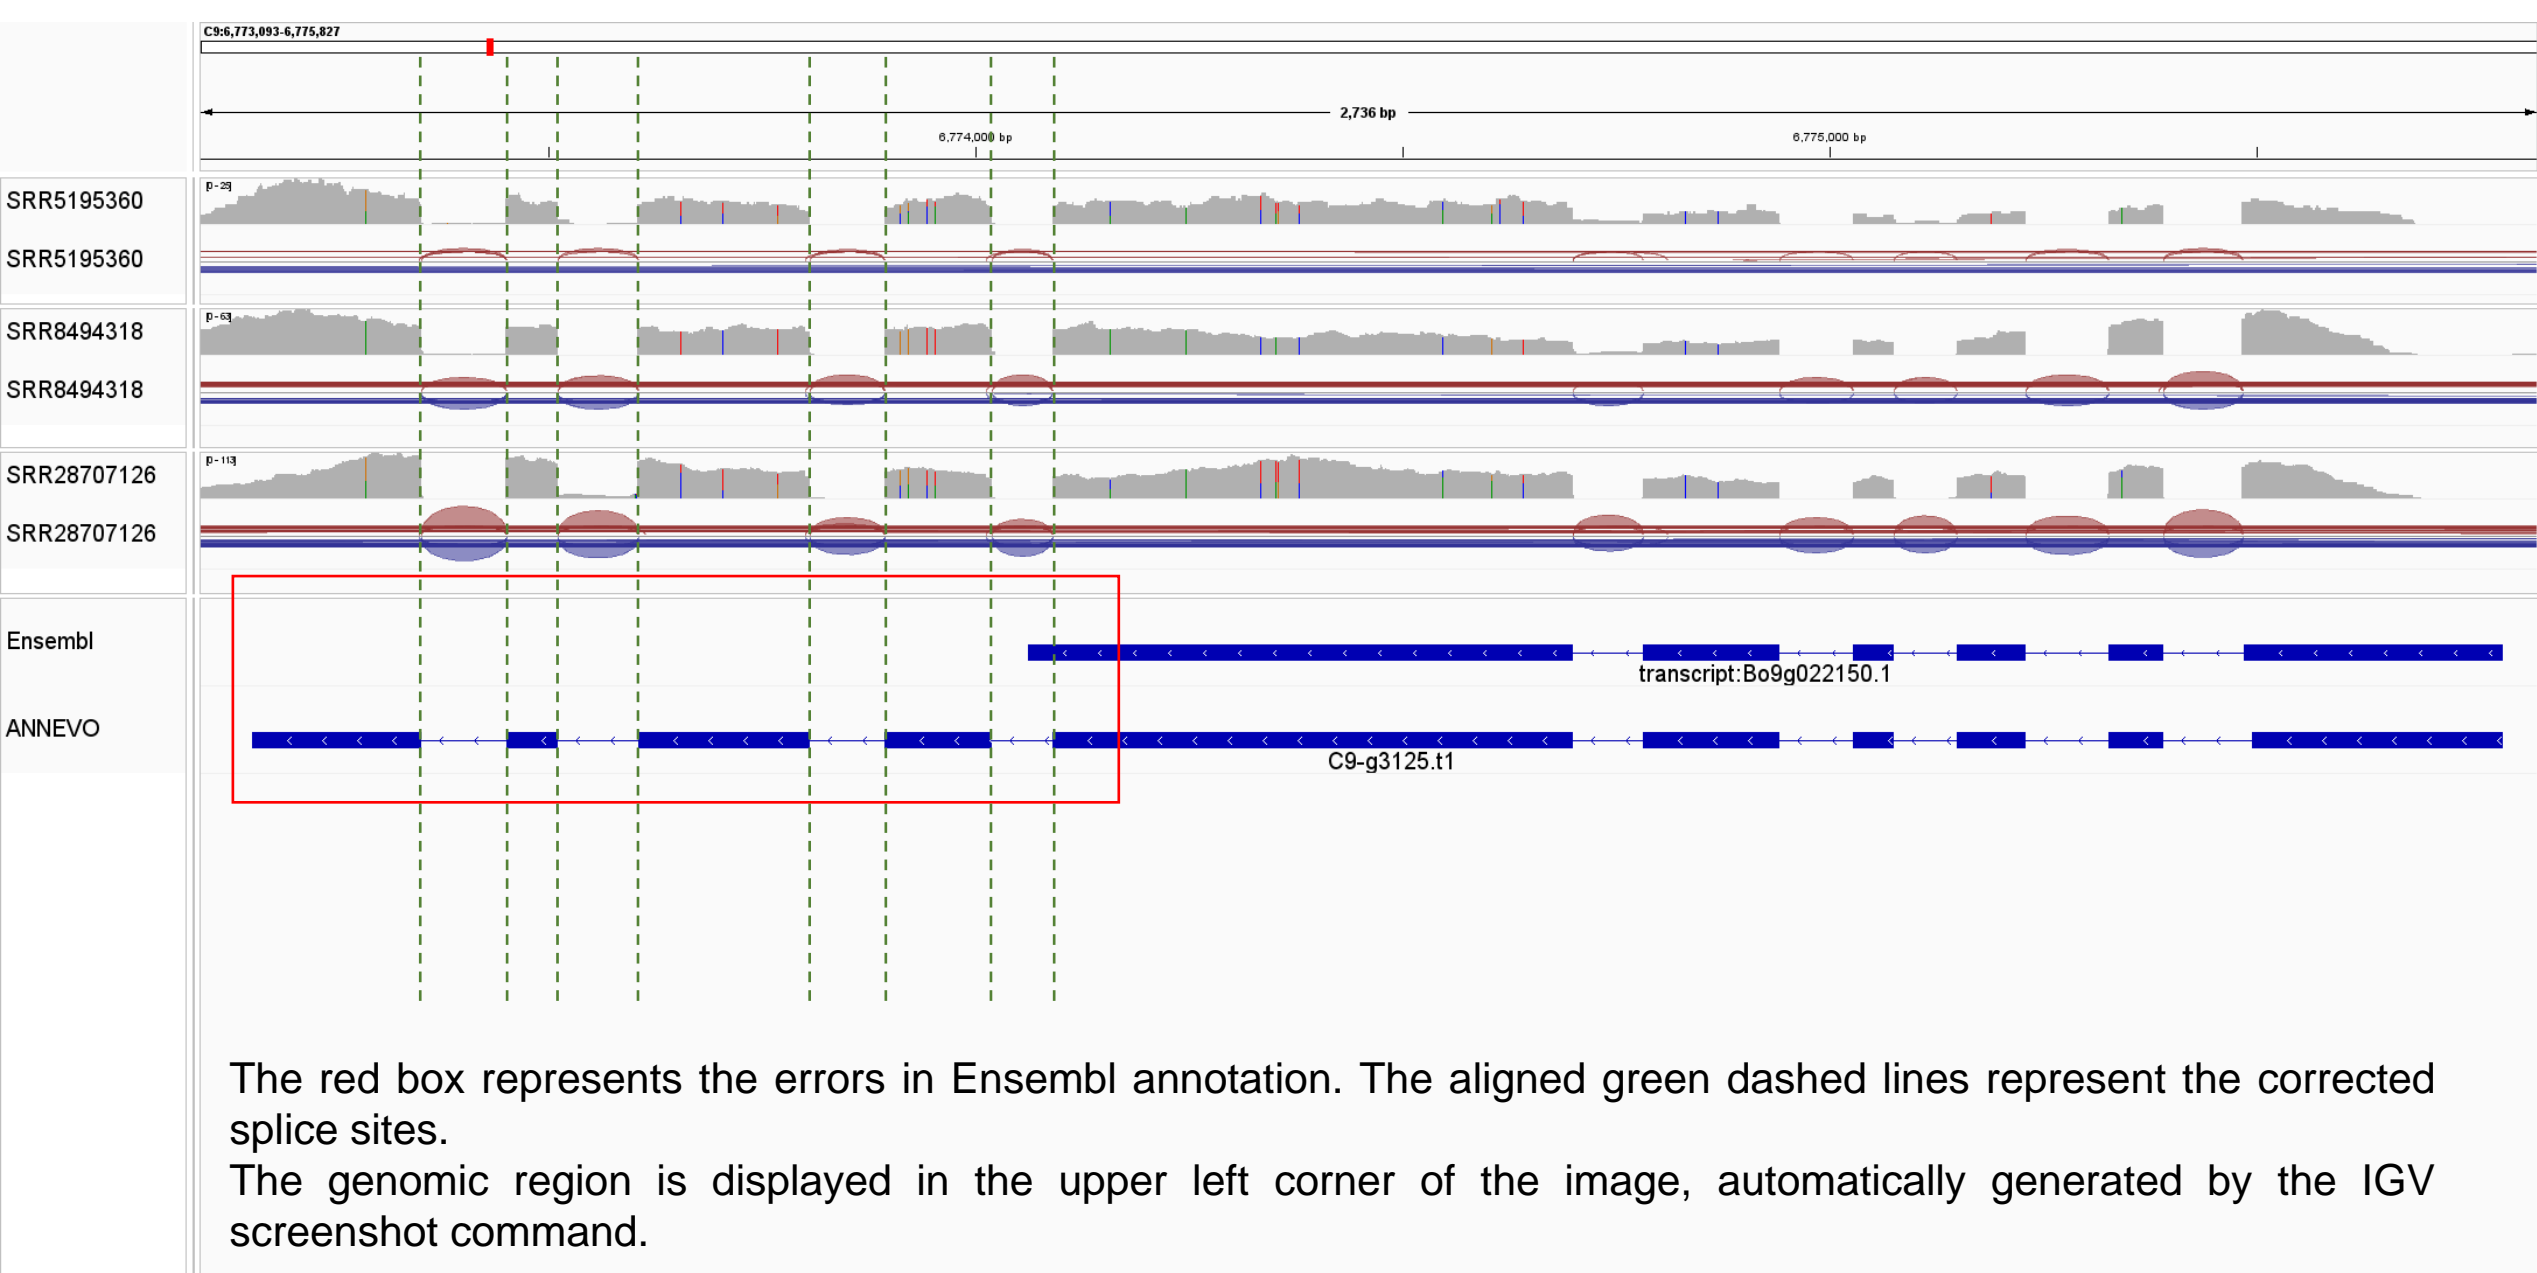

Erroneous Gene Fusion in Ensembl



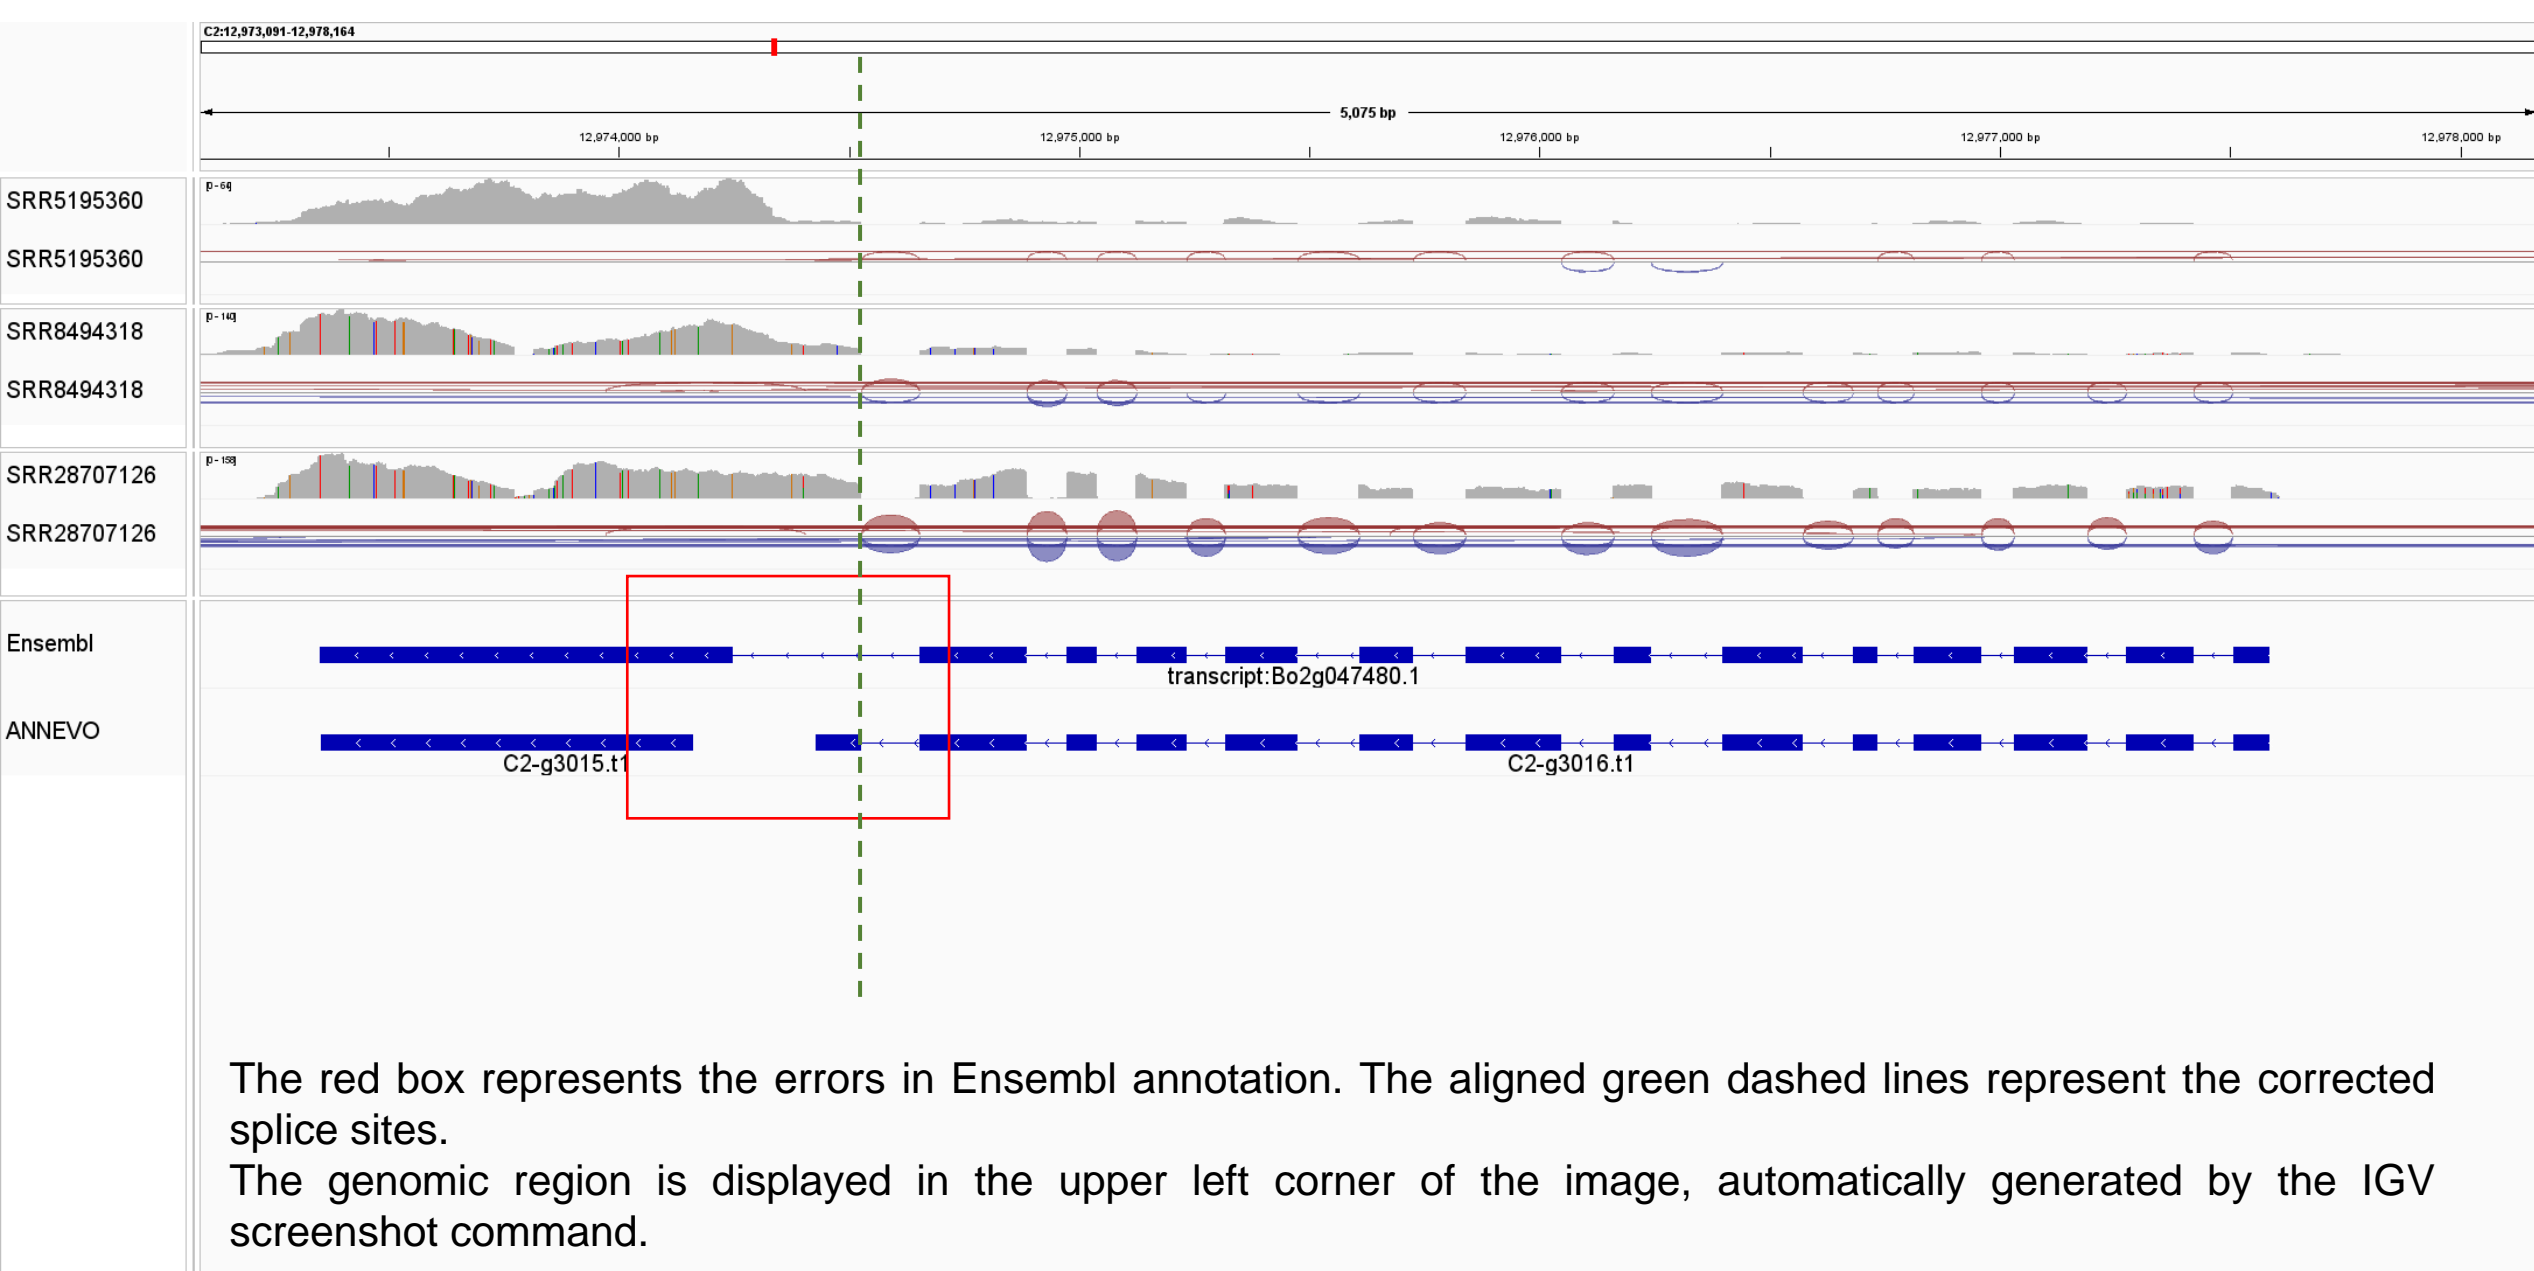

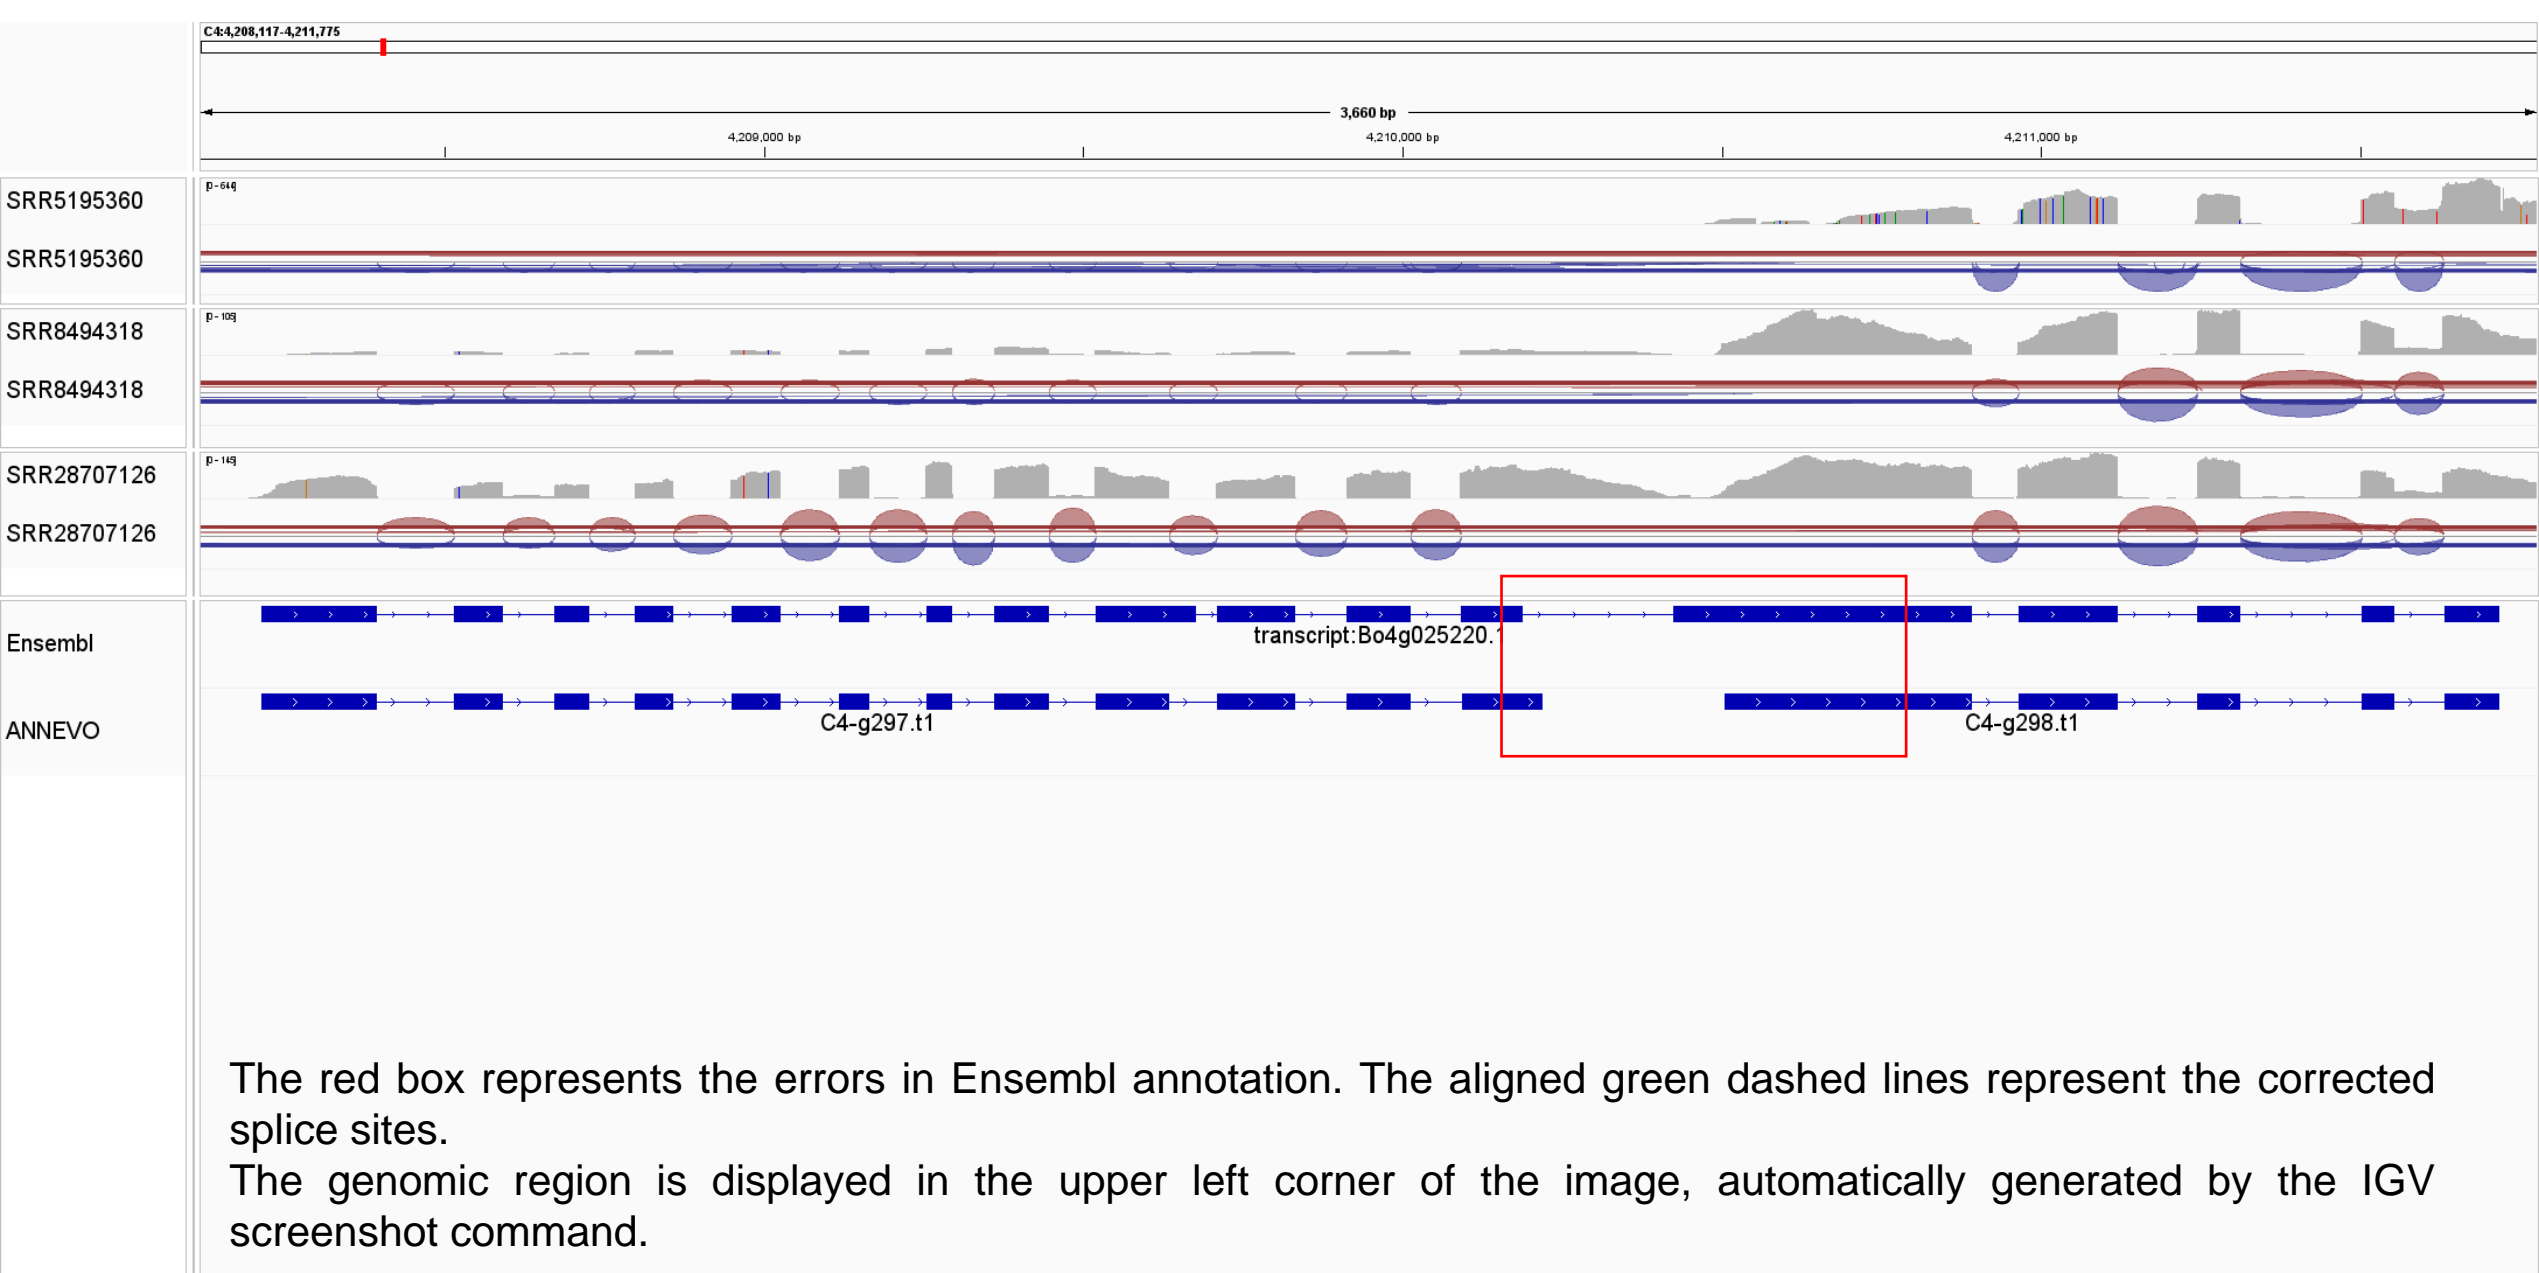

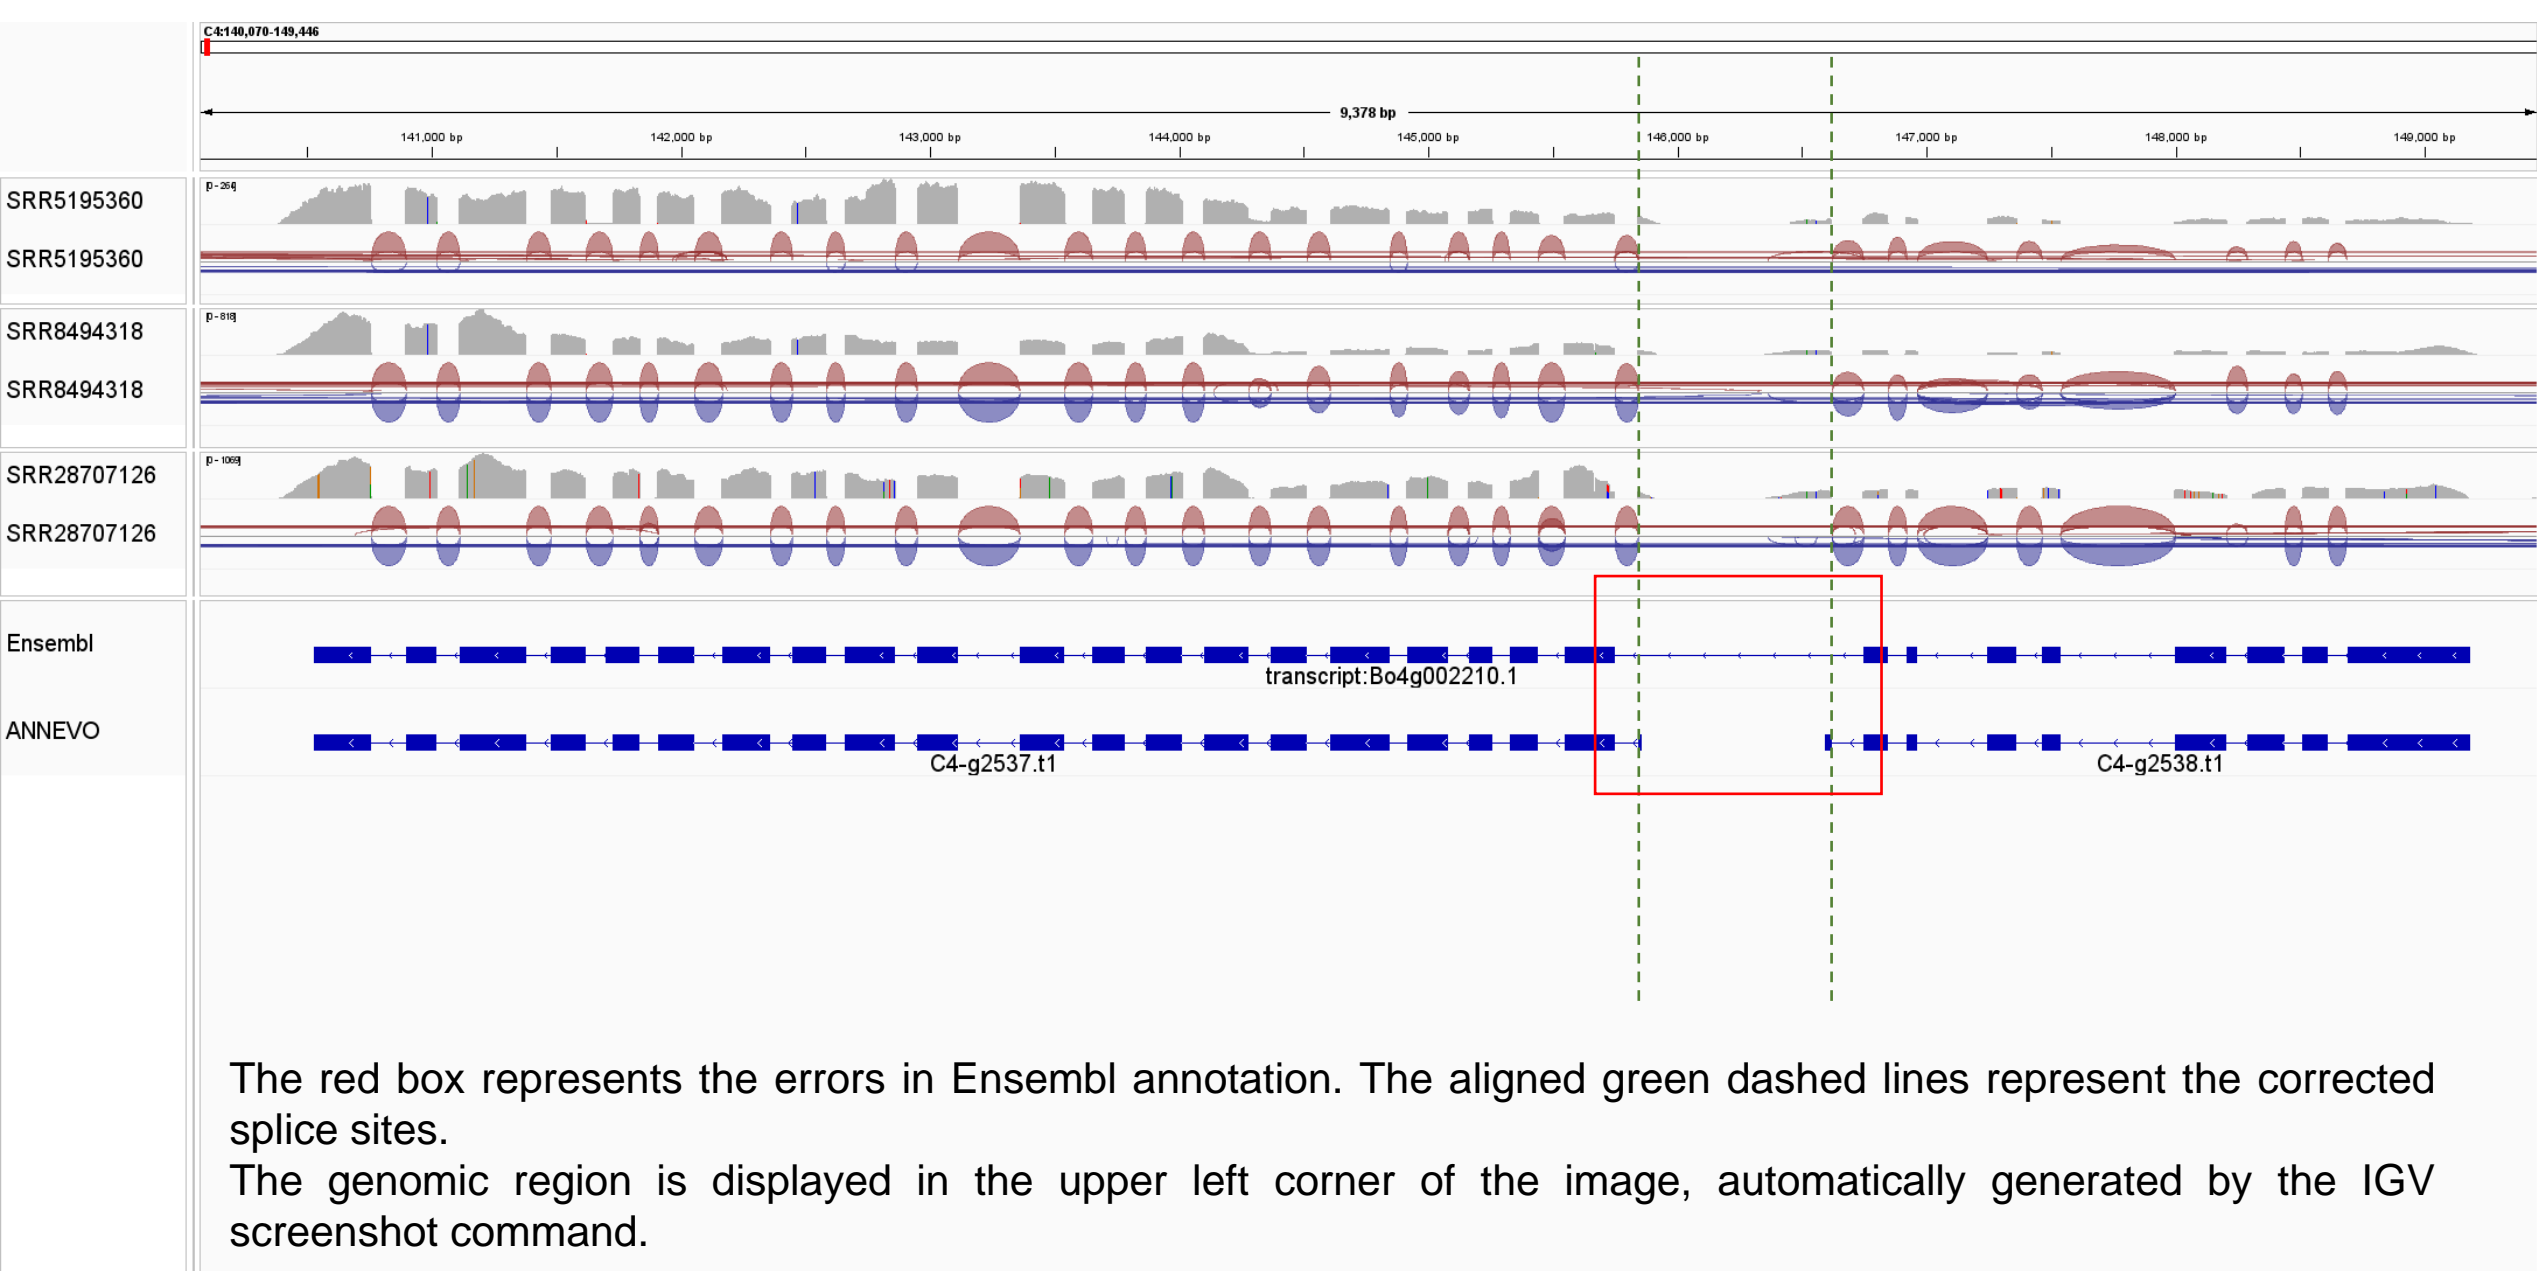

The red box represents the errors in Ensembl annotation. The aligned green dashed lines represent the corrected splice sites.

The genomic region is displayed in the upper left corner of the image, automatically generated by the IGV screenshot command.

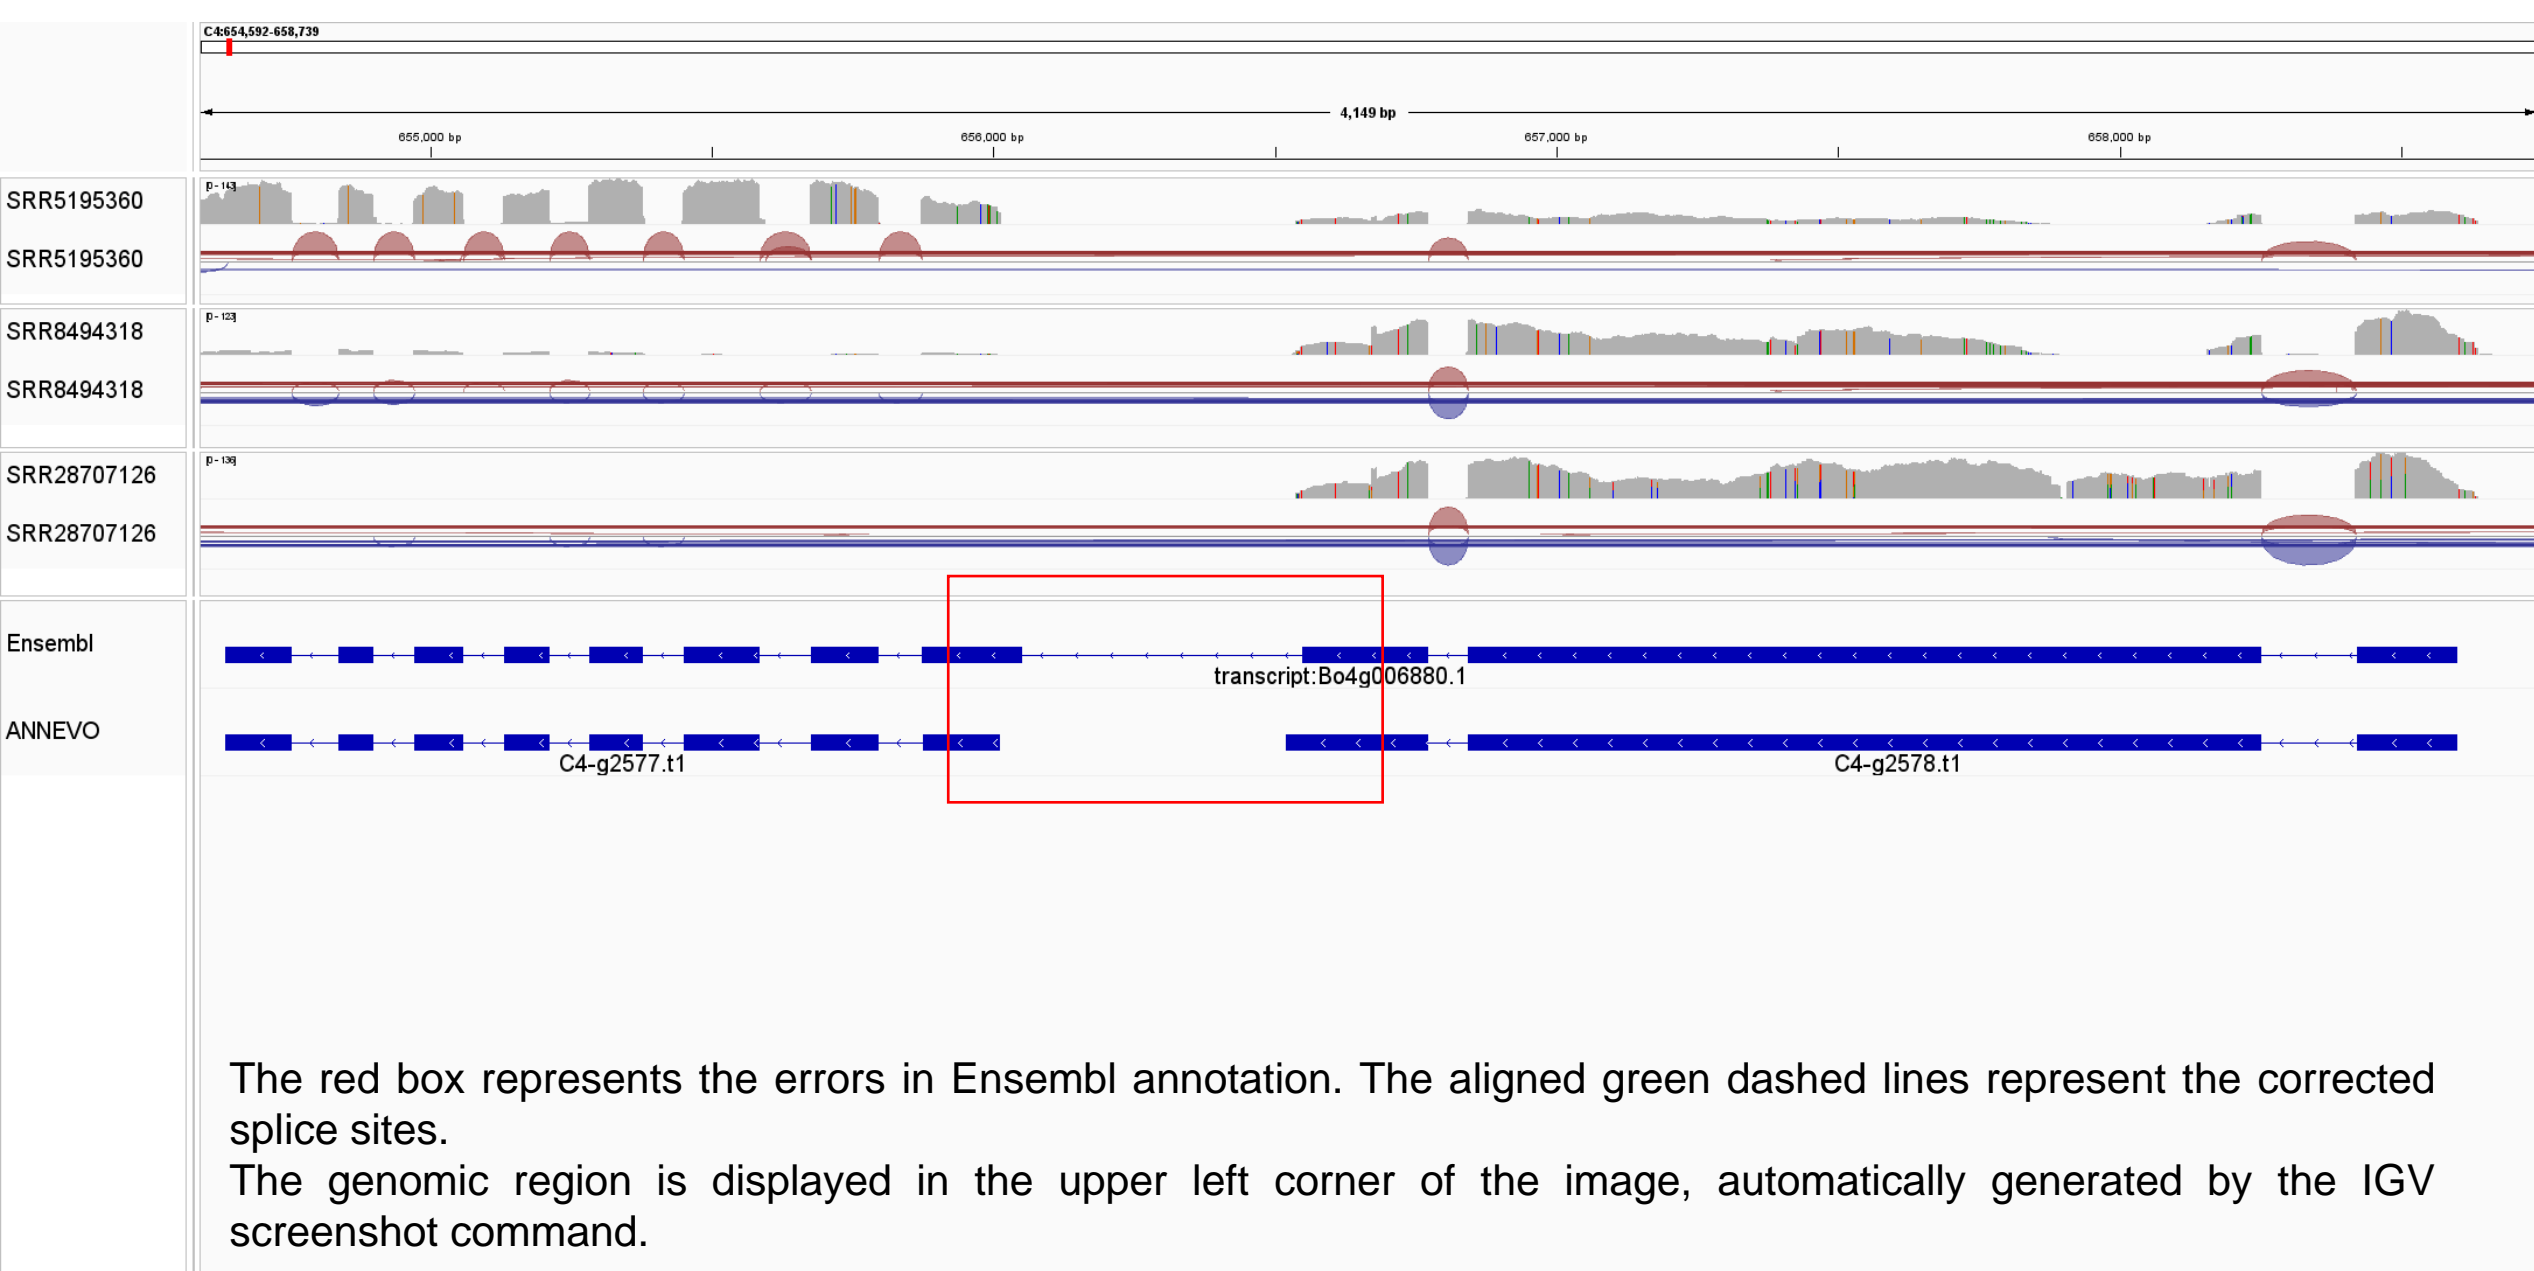

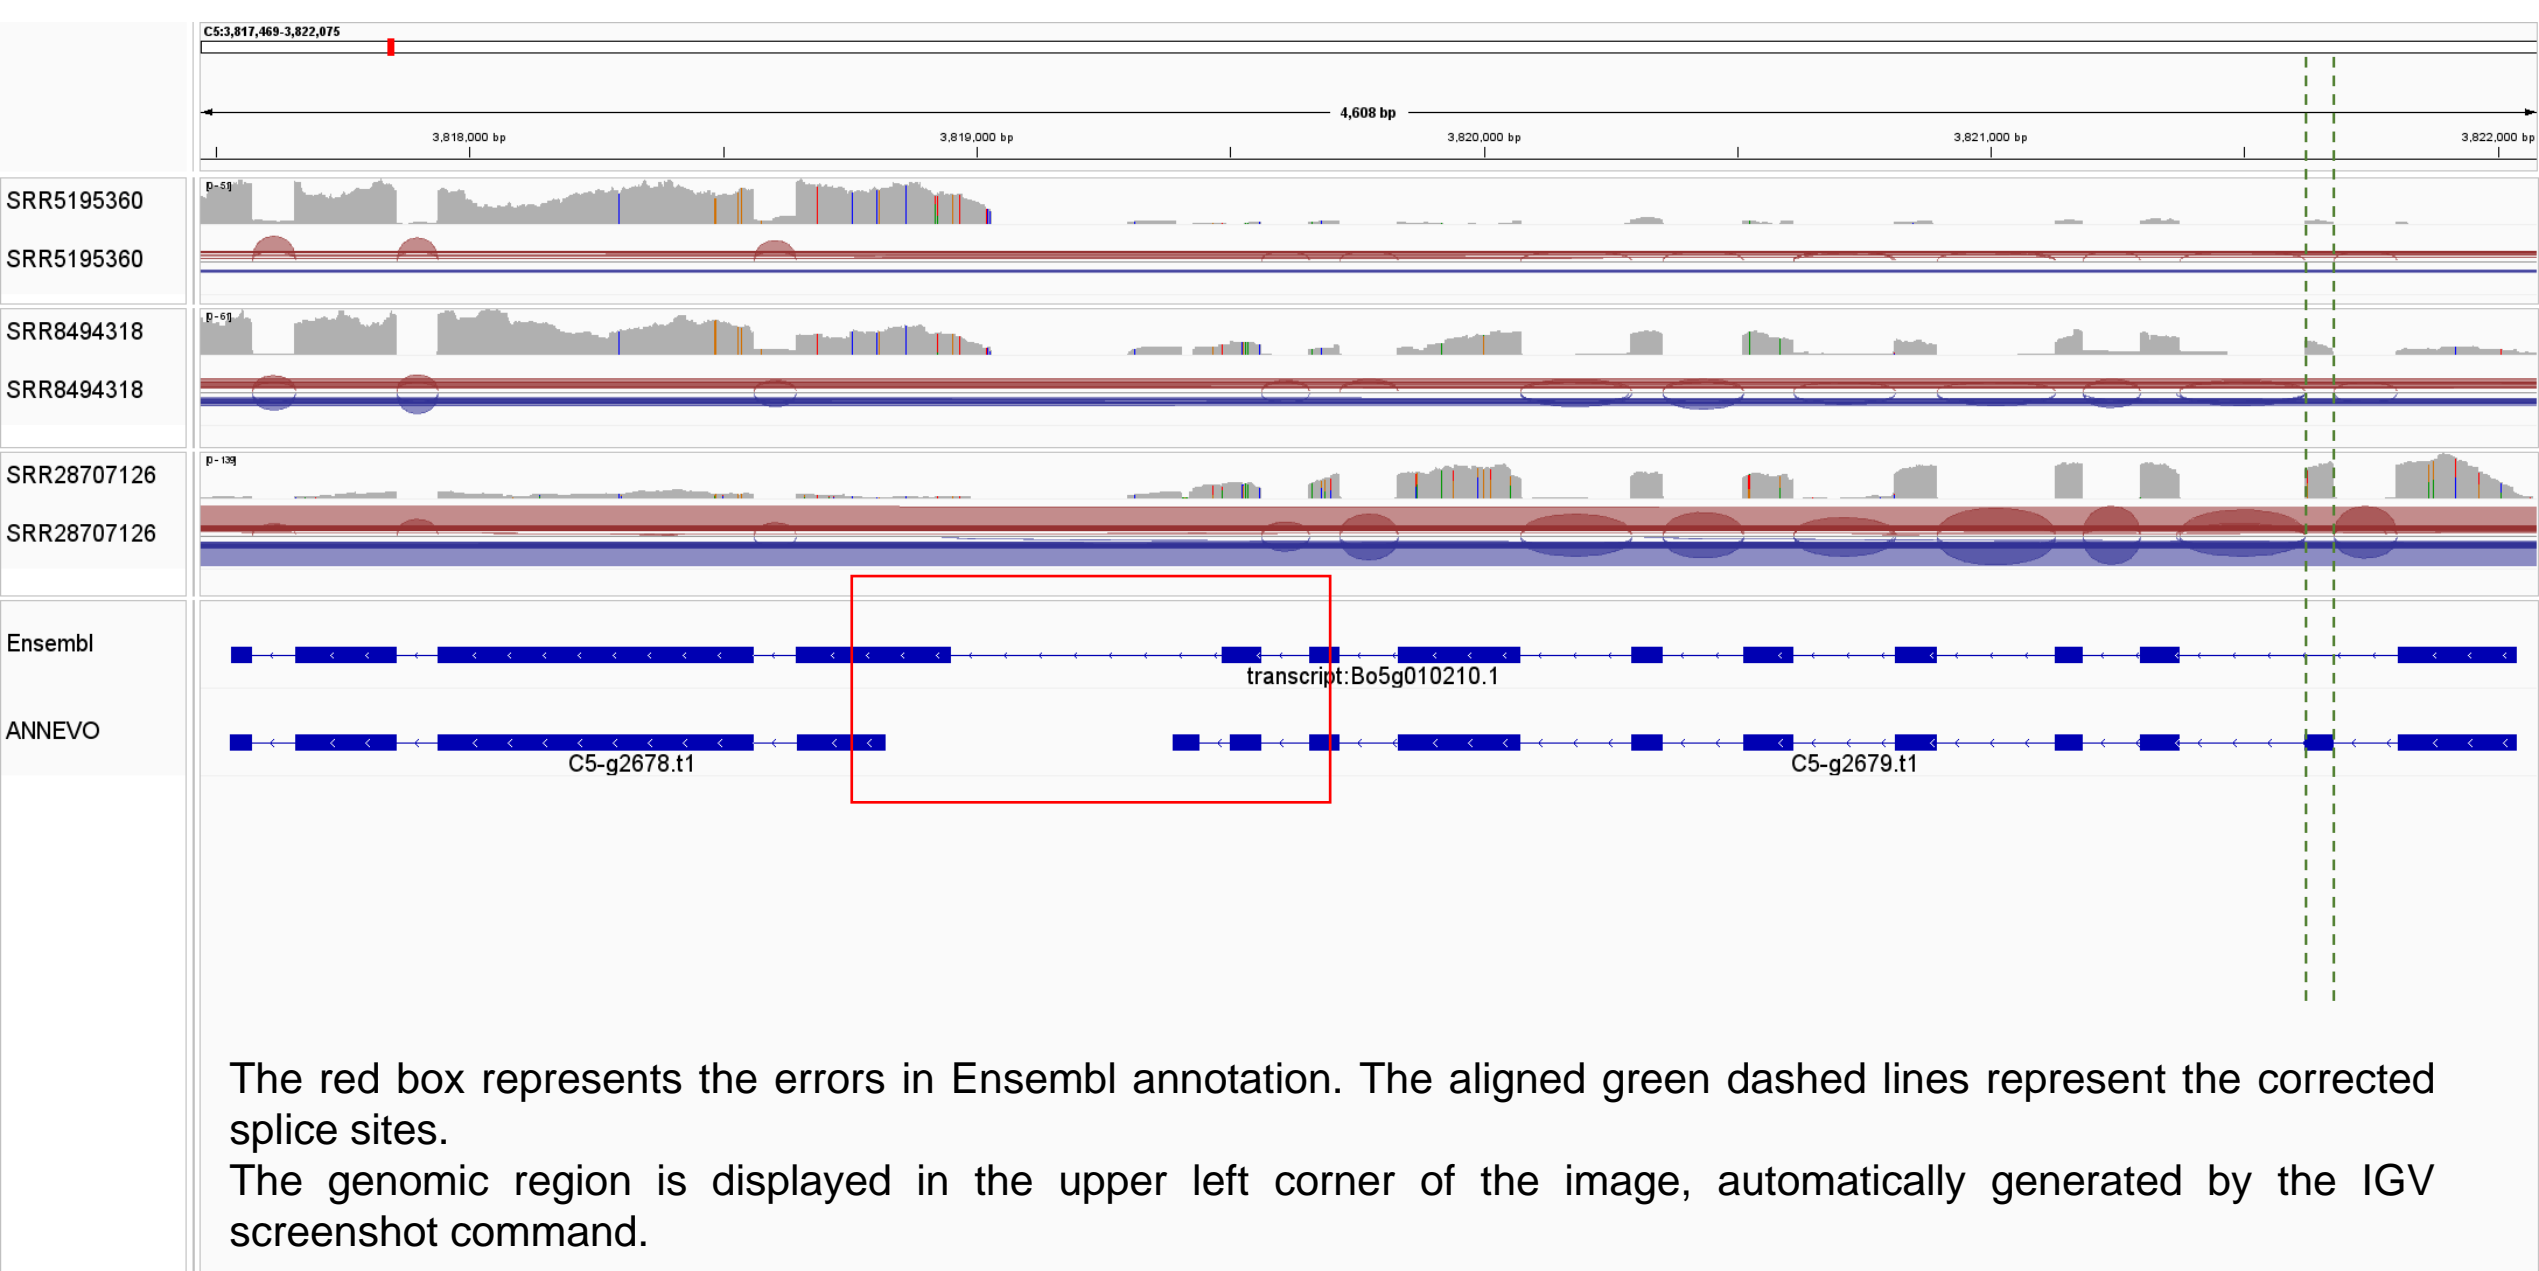

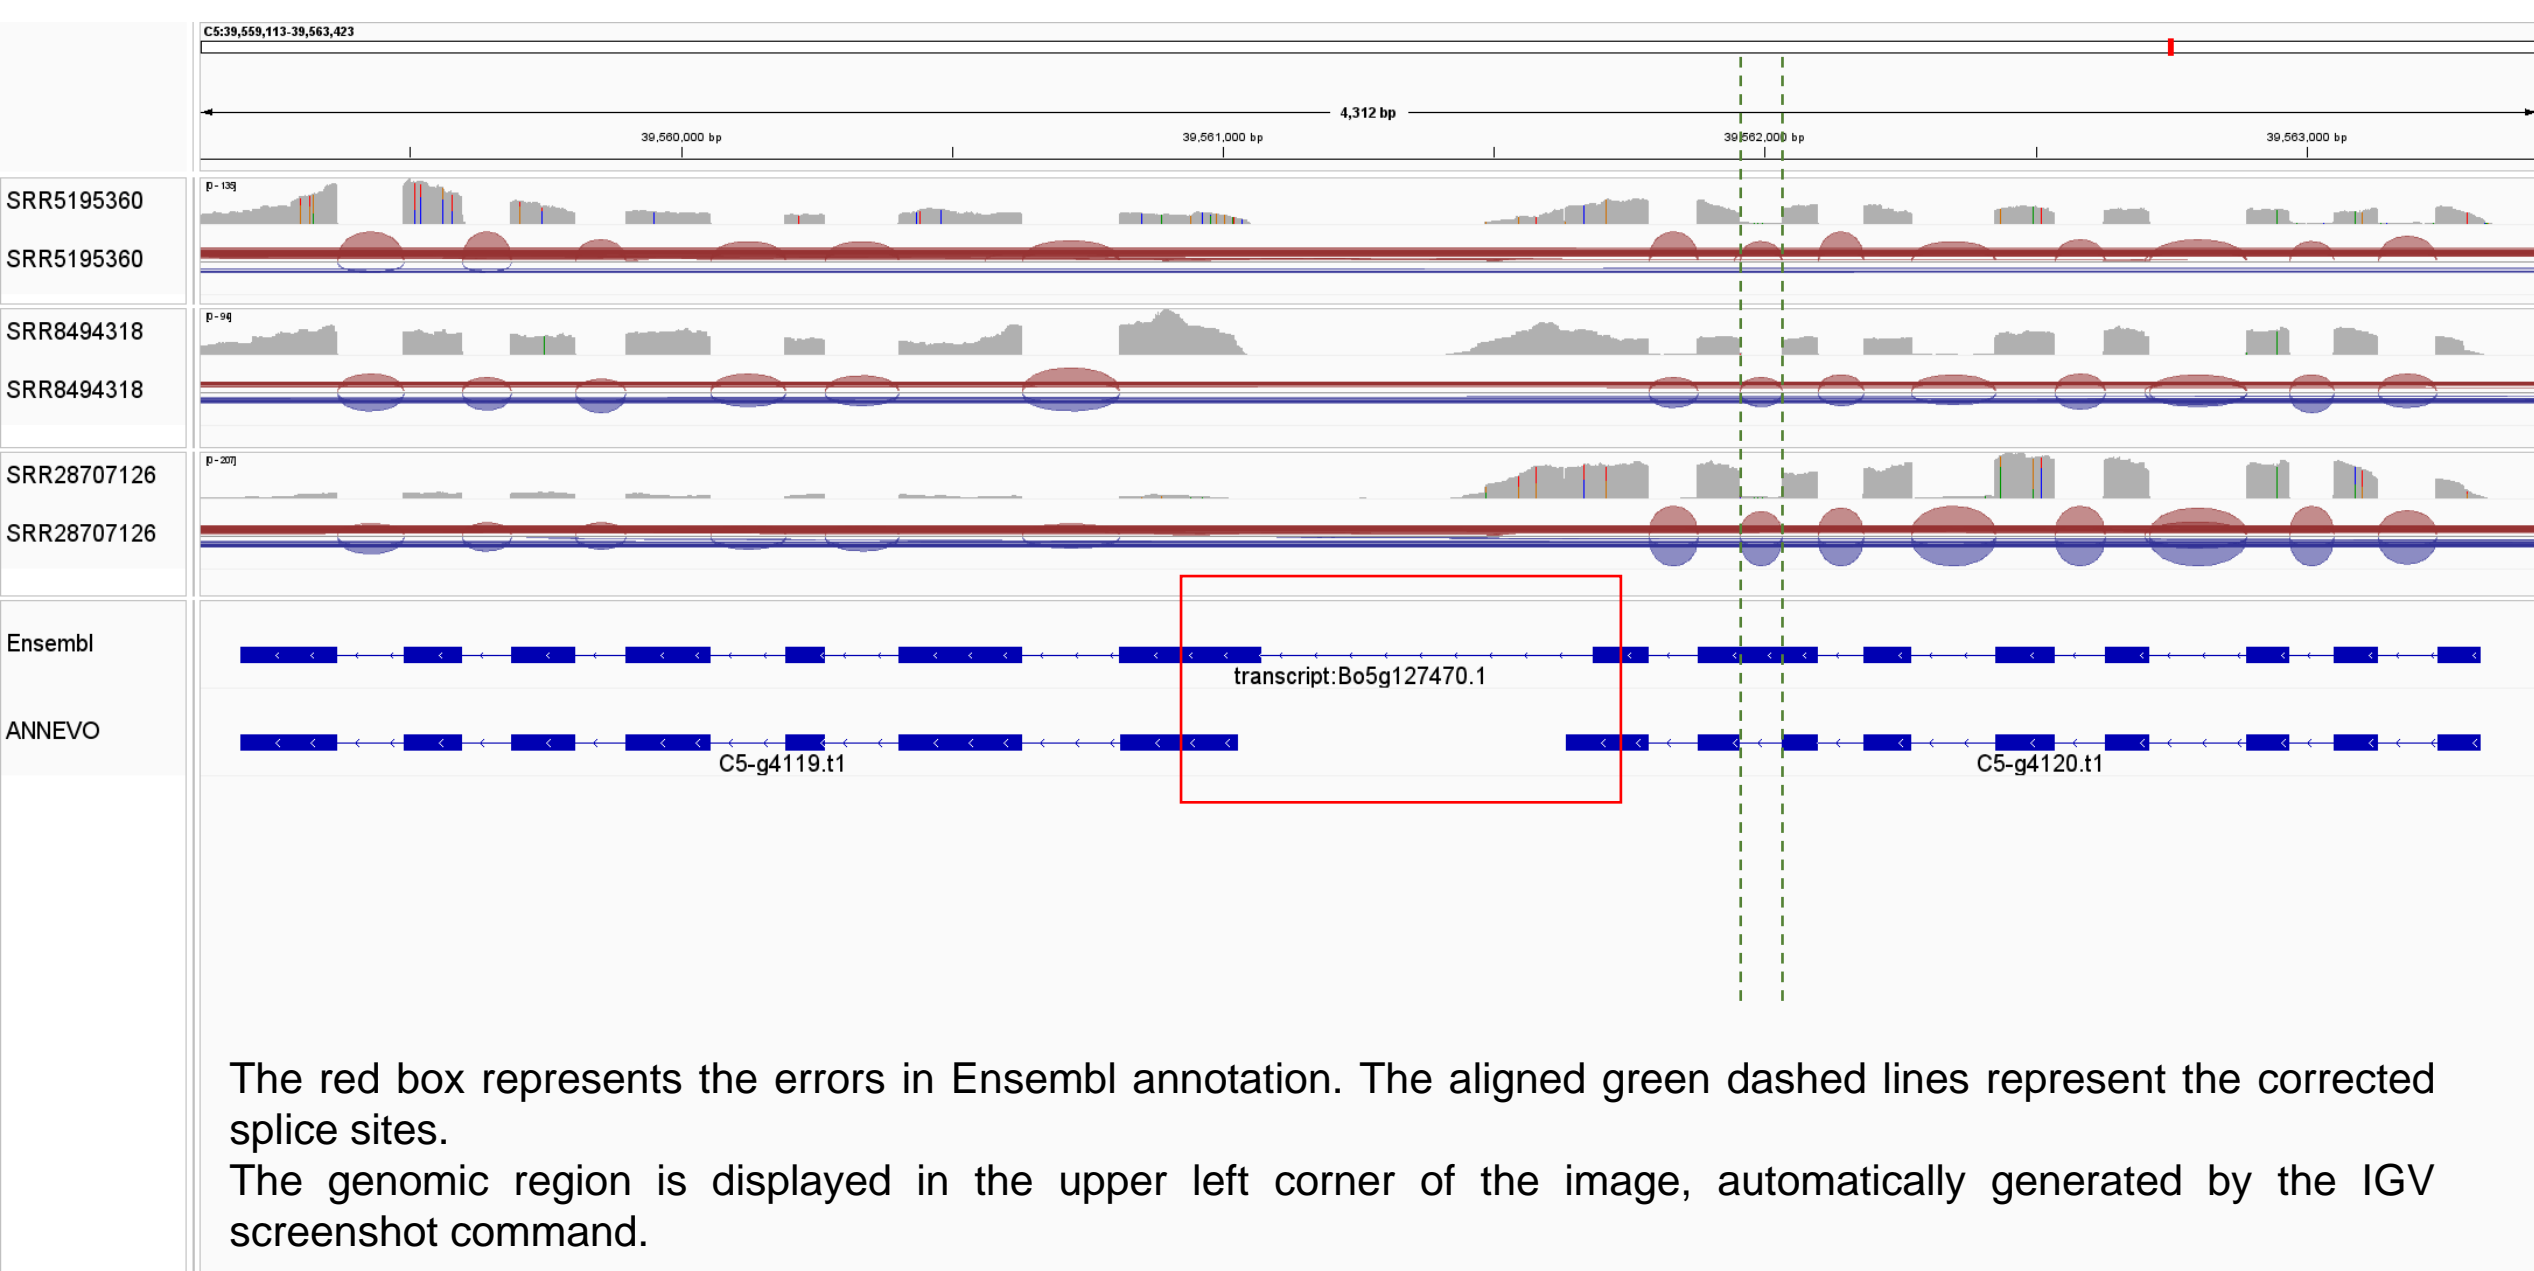

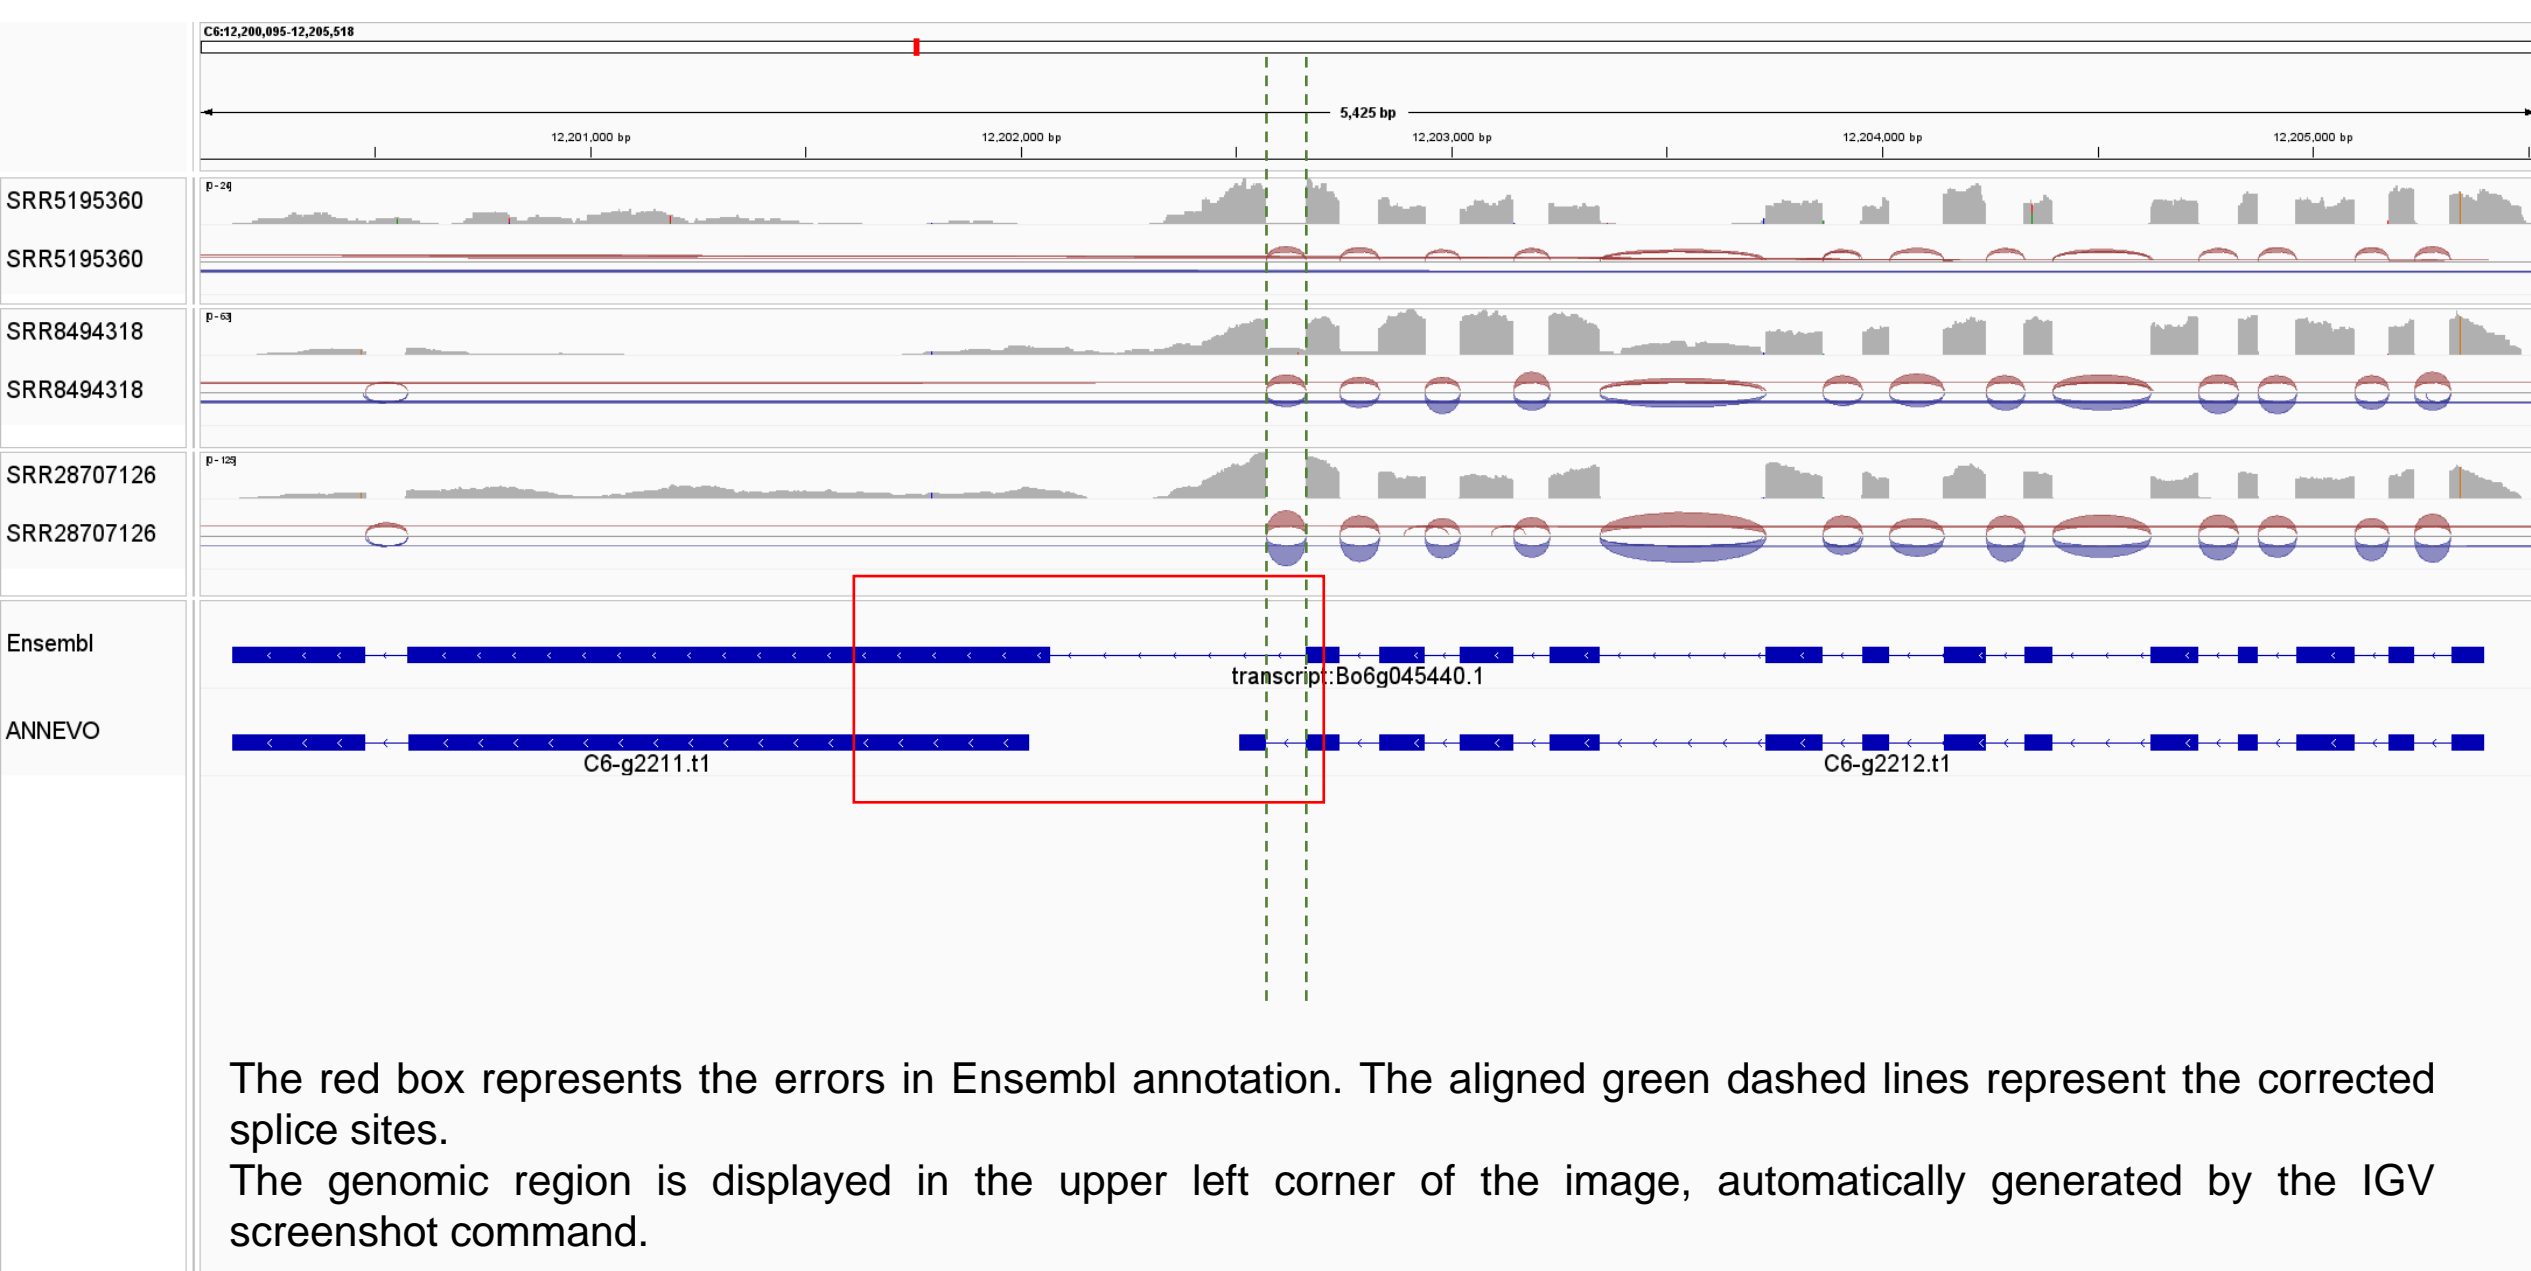

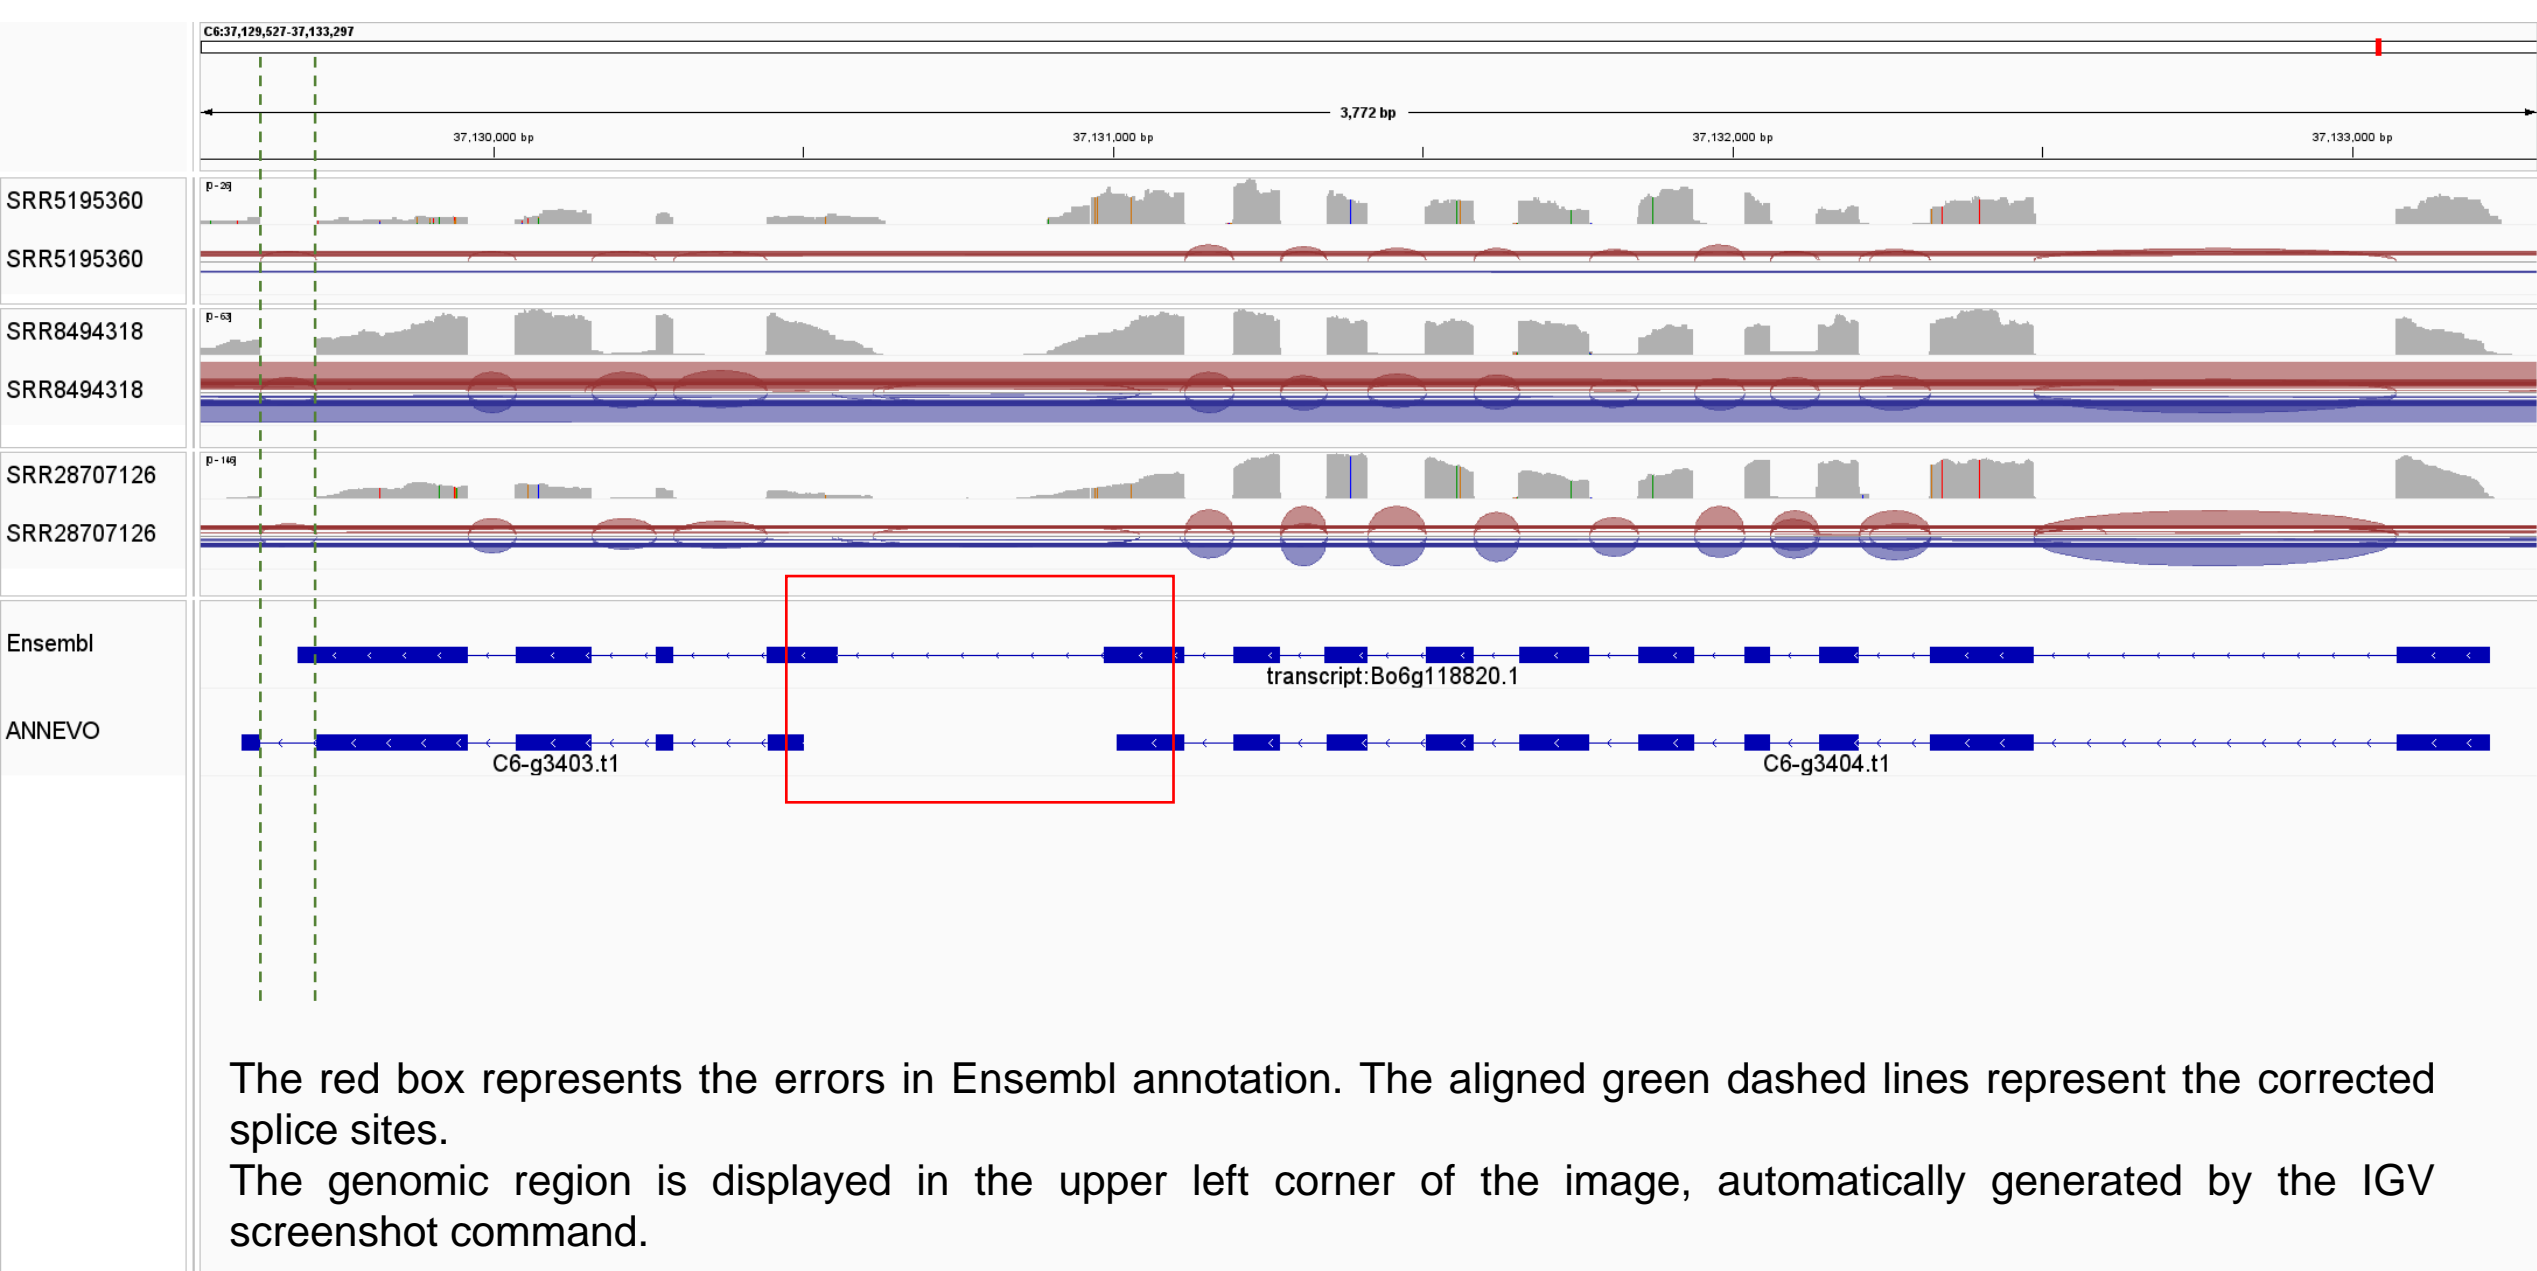

The red box represents the errors in Ensembl annotation. The aligned green dashed lines represent the corrected splice sites.

The genomic region is displayed in the upper left corner of the image, automatically generated by the IGV screenshot command.



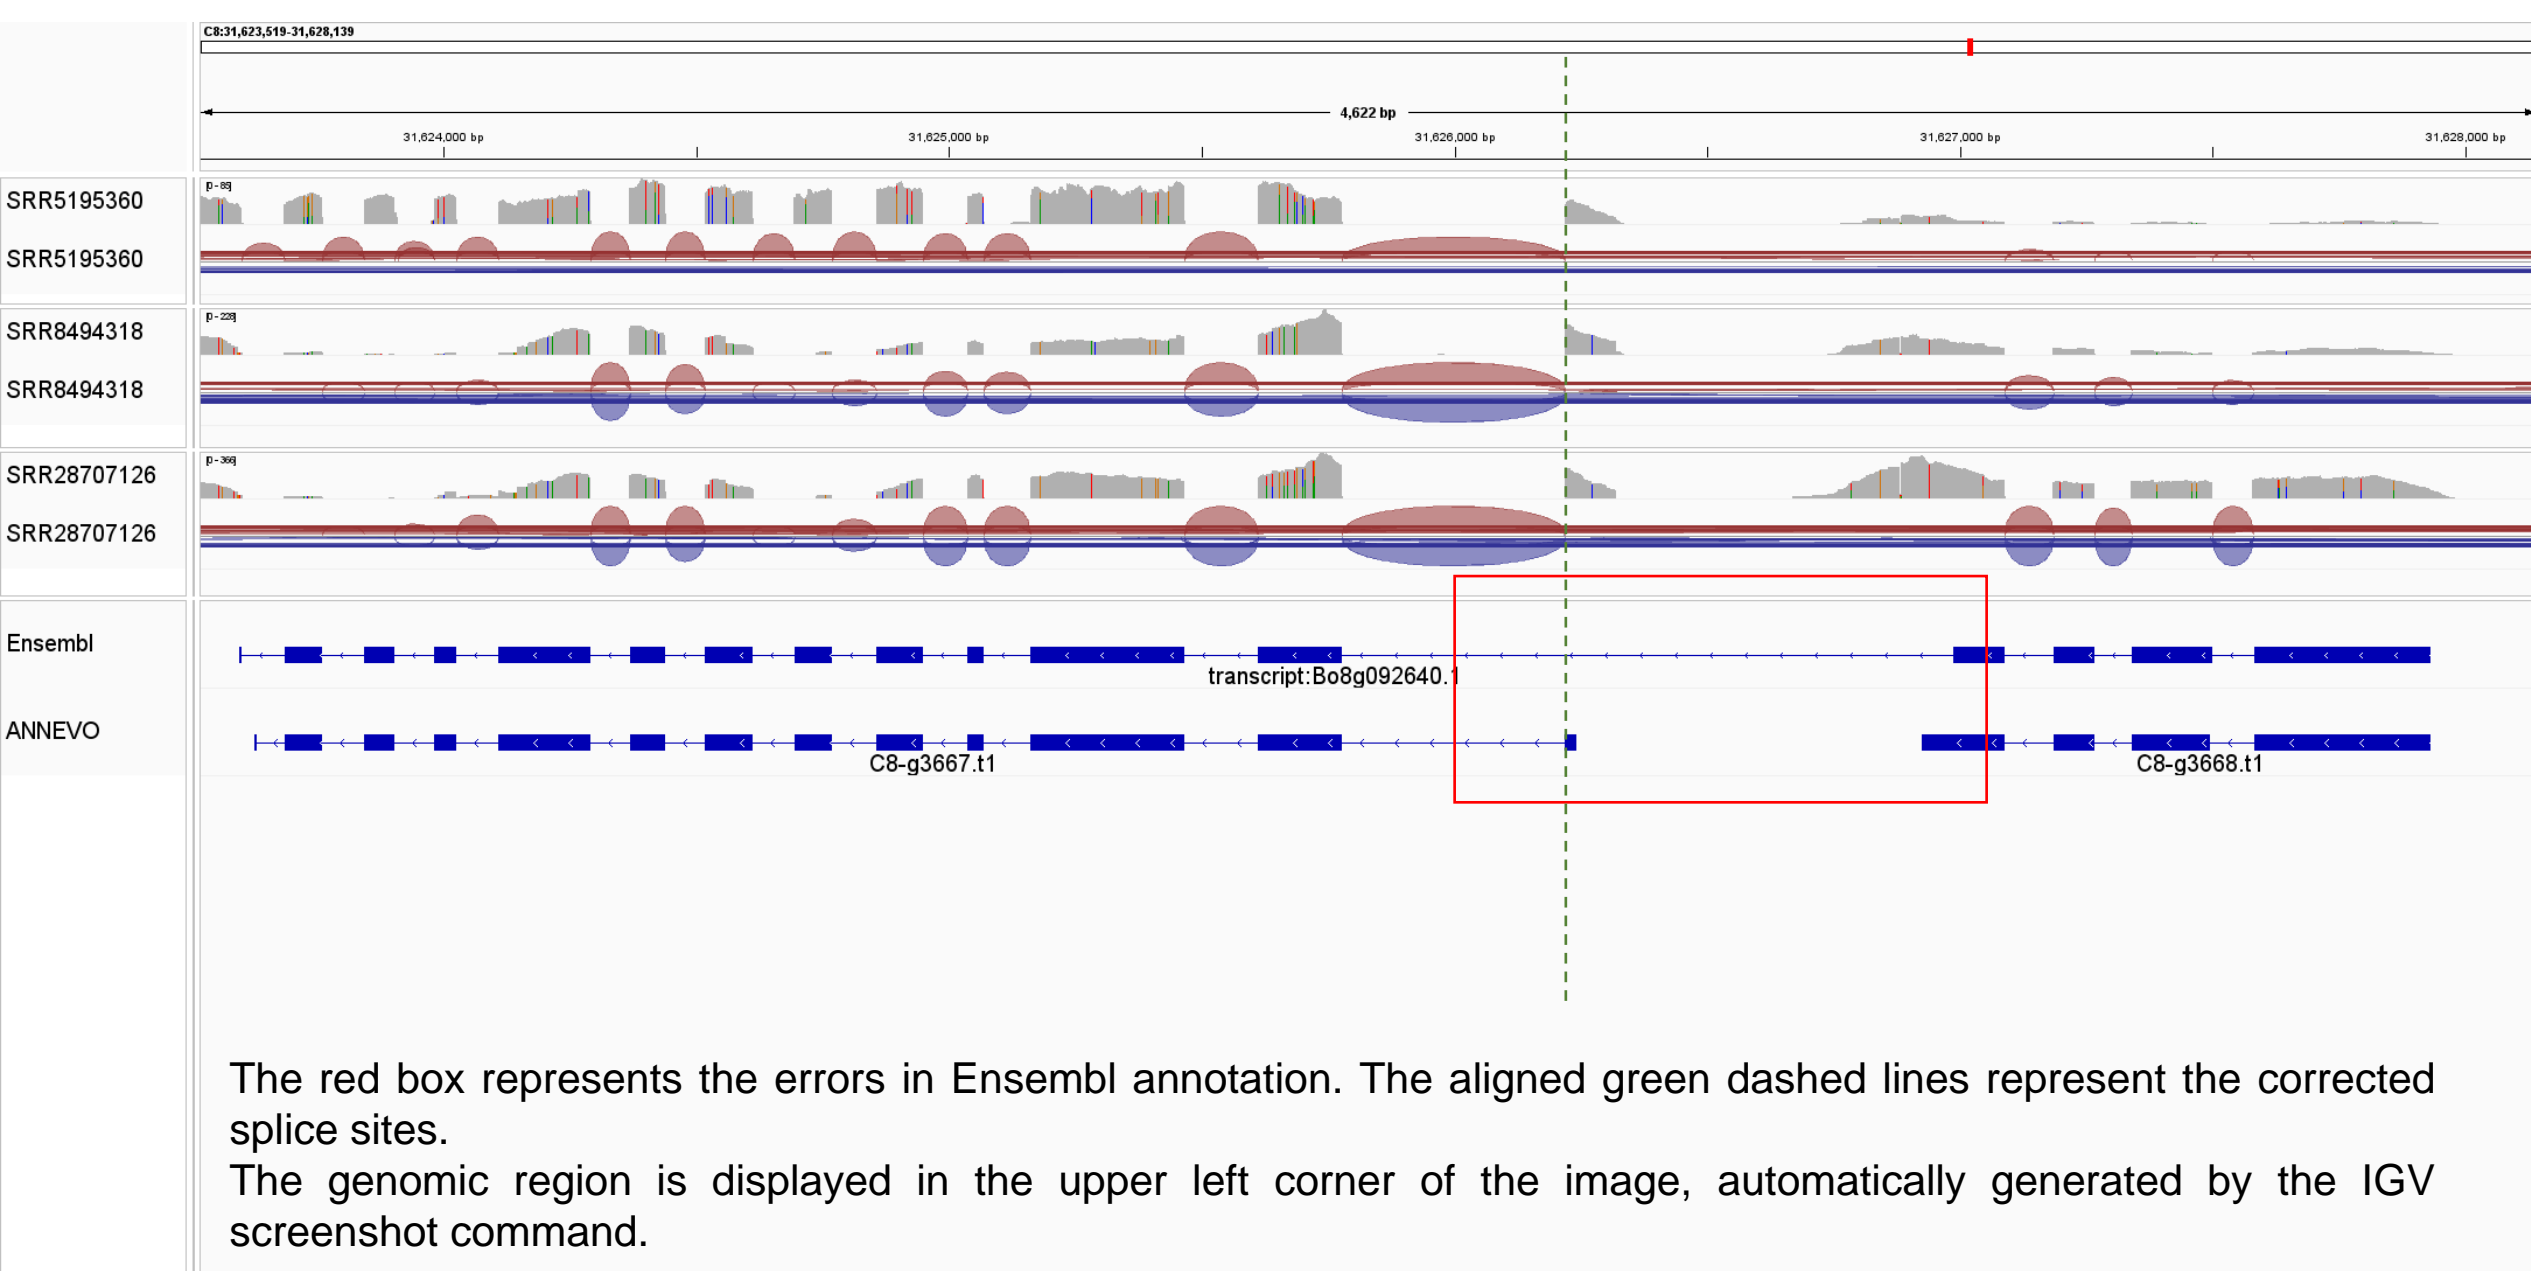

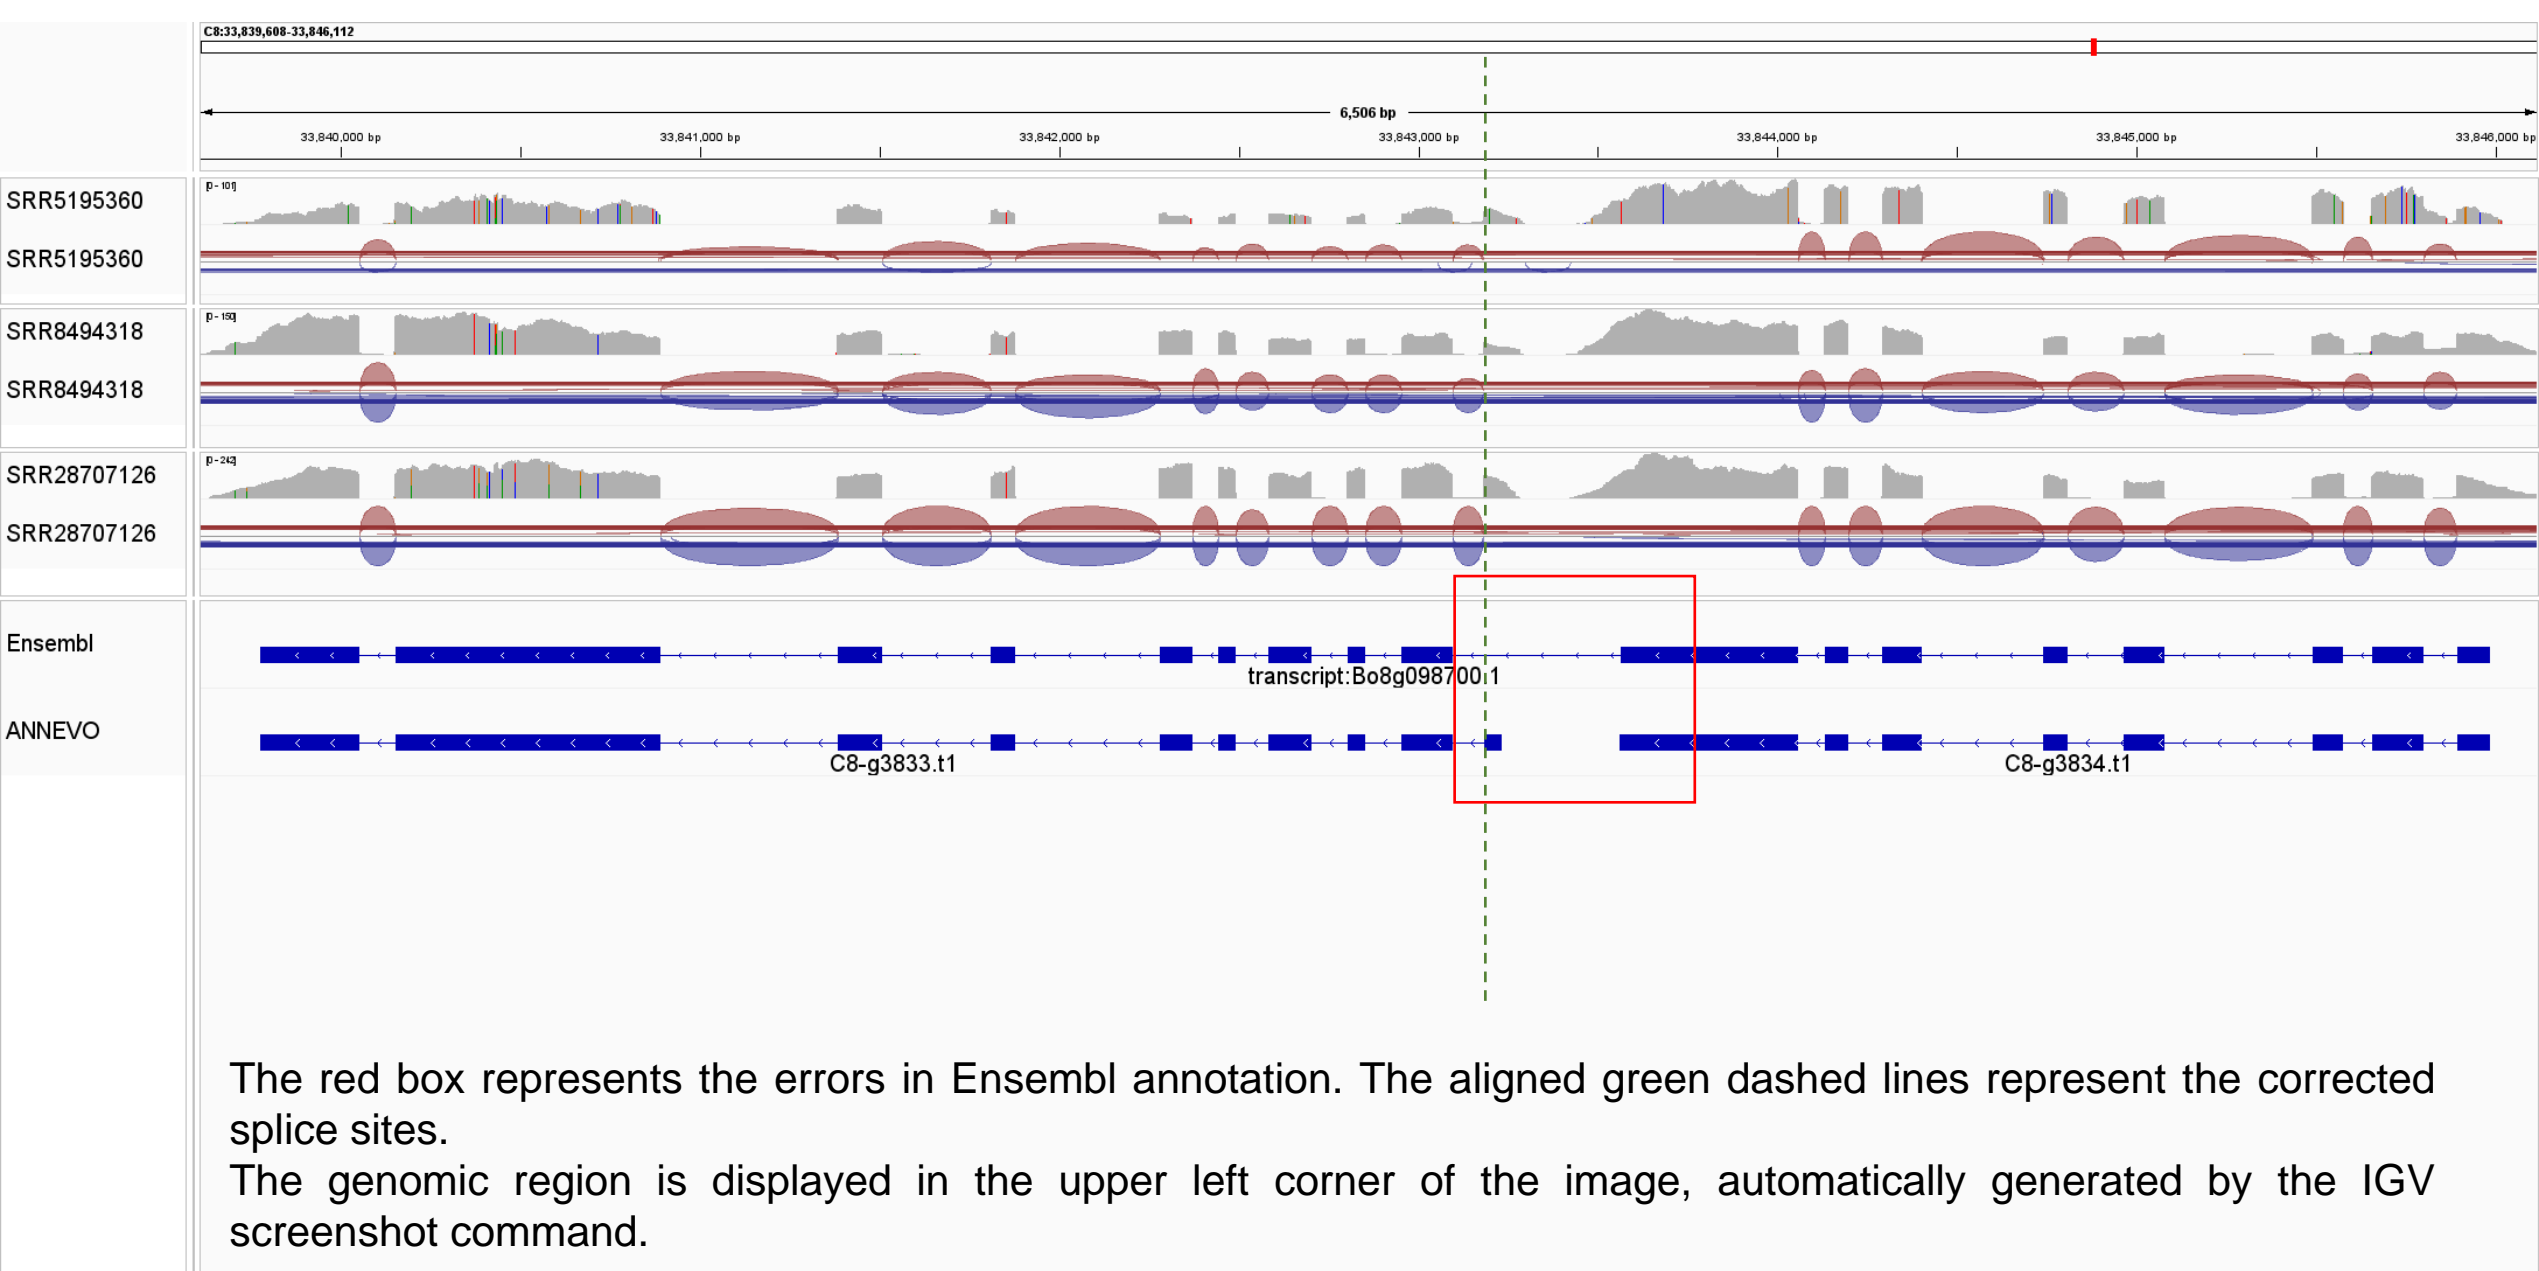

Erroneous Gene Break in Ensembl

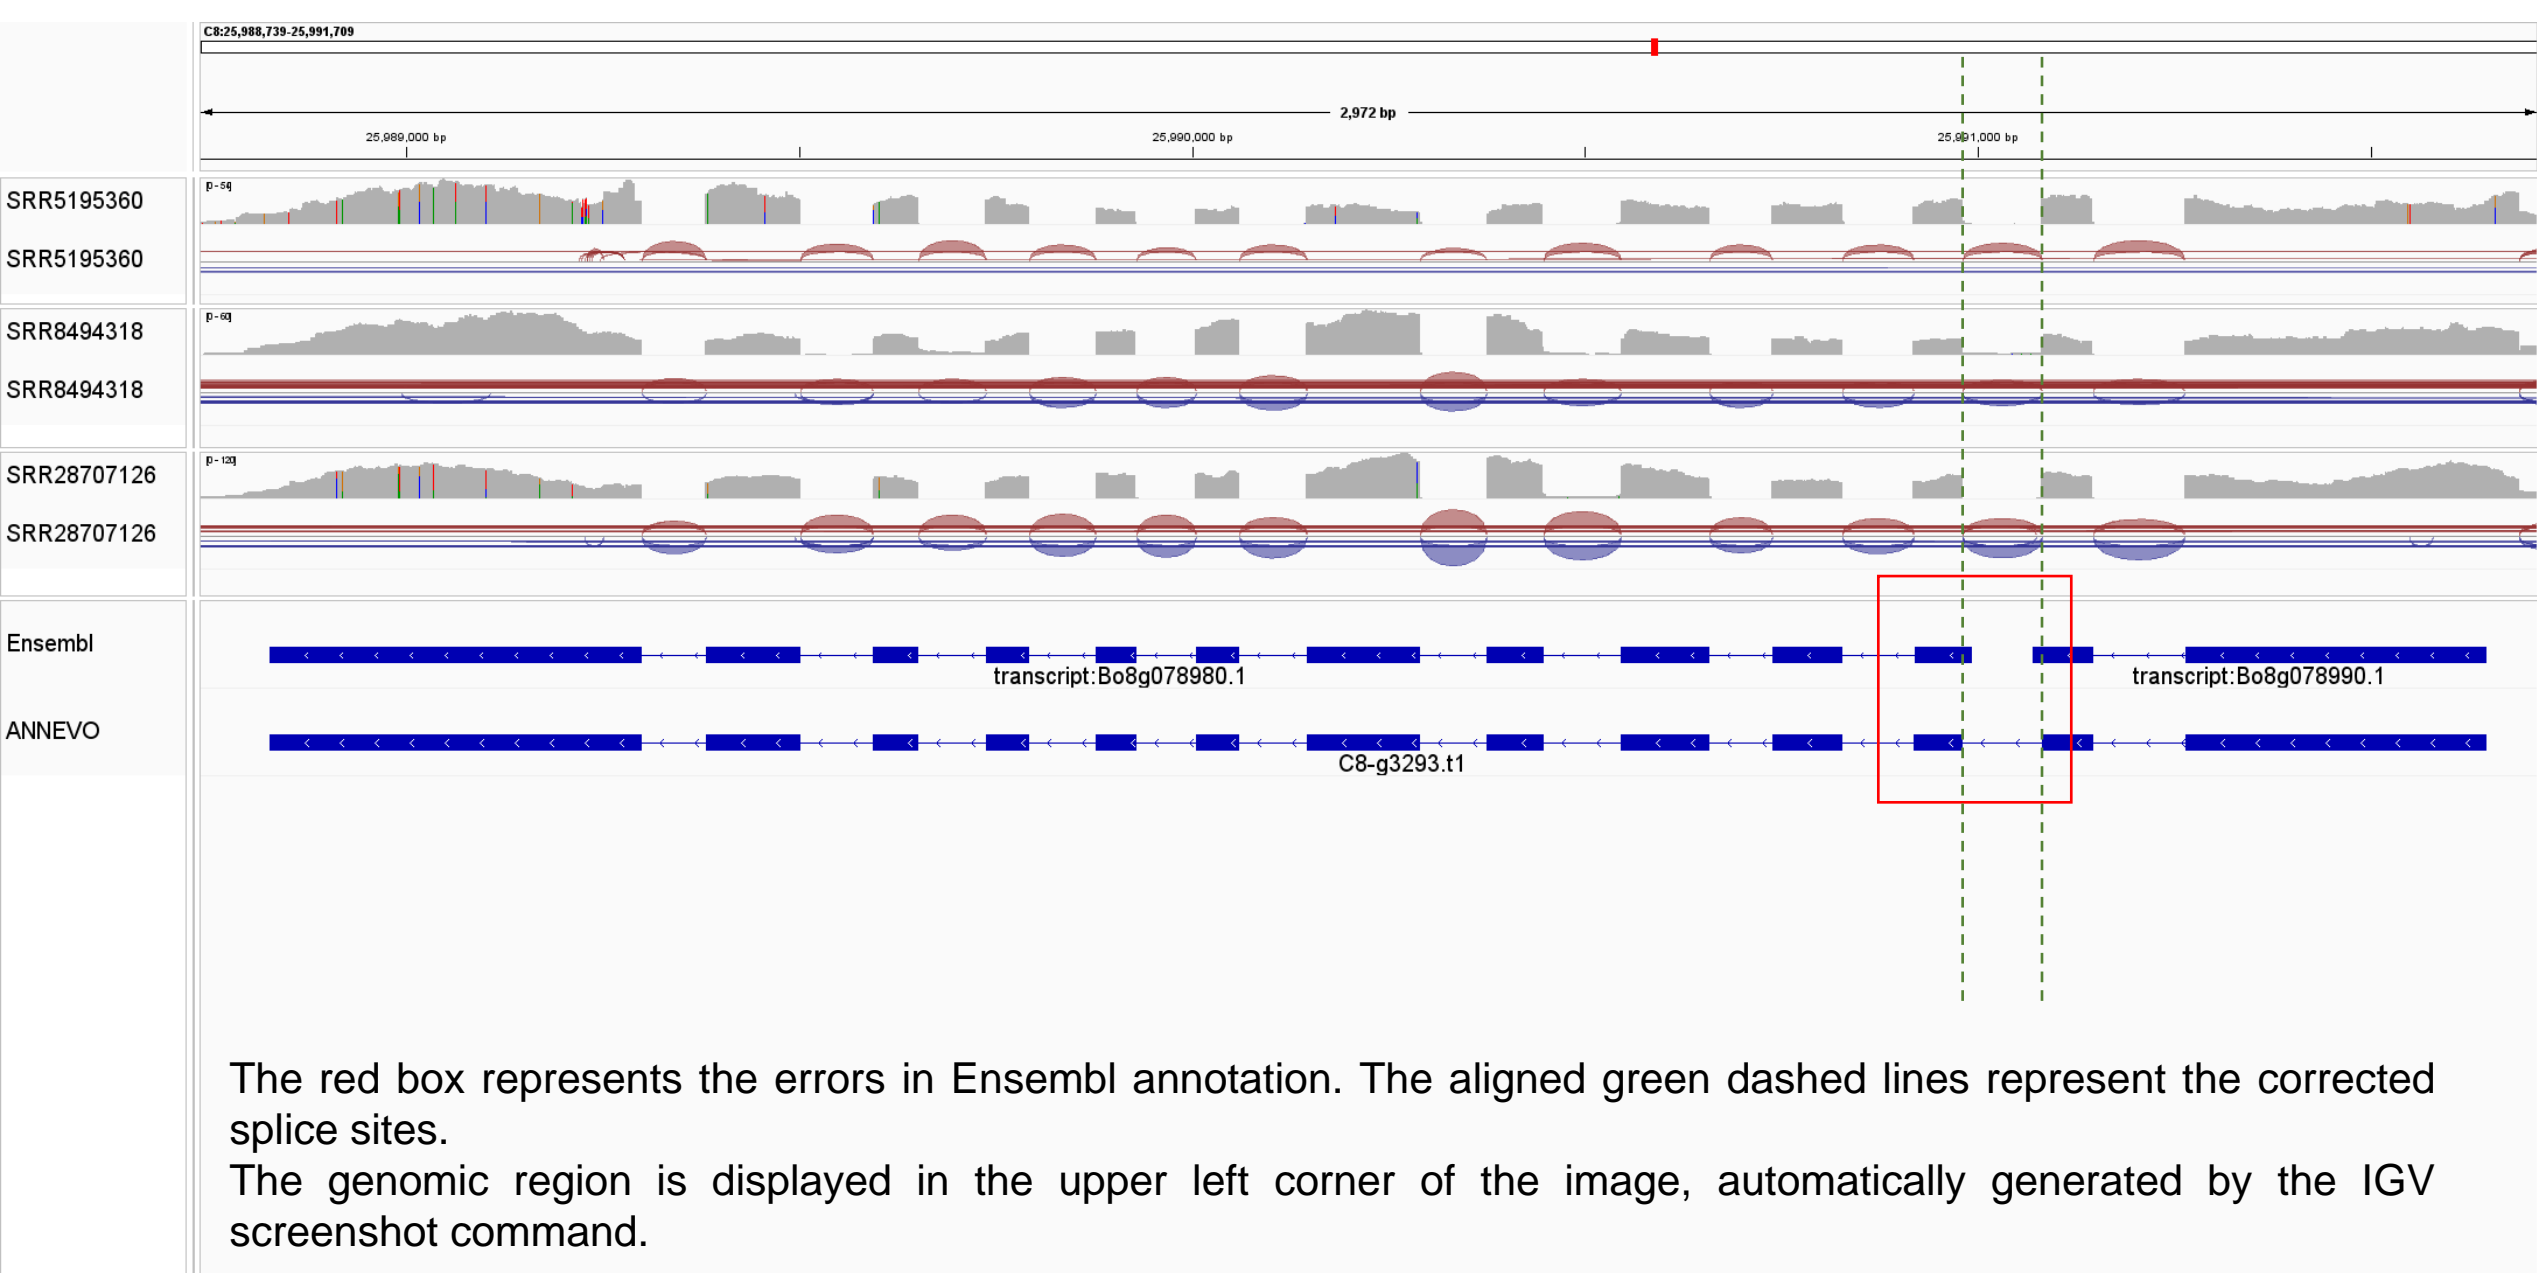

Supplement: Supplementary file 2 [file bf10956fa183545b08316418.pdf]
