# Supplementary material for: Highly accurate ab initio gene annotation with ANNEVO
Source: Research Square preprint supplement (doi:10.21203/rs.3.rs-6402260/v1), 2025-04-24
Supplement: Supplementary file 2 [file a251aff184ea36b0880dbe6a.xlsx]

## Sheet: Table 1
Supplementary Table 1. The performance evaluation of ANNEVO and Augustus on Fungi lineage of RefSeq.
Species name	ANNEVO_NT(CDS)_f1	ANNEVO_gene_f1	ANNEVO_BUSCO	Augustus_NT(CDS)_f1	Augustus_gene_f1	Augustus_BUSCO	RefSeq_BUSCO
Acaromyces_ingoldii	0.917	0.805	89.2	0.6047	0.4266	43.6	94.6
Agaricus_bisporus	0.8659	0.6756	95.8	0.862	0.6284	92.7	94.8
Alternaria_alternata	0.9499	0.8584	99.2	0.924	0.7016	98.7	99.4
Alternaria_arborescens	0.9712	0.8727	99.4	0.9729	0.757	98.7	99.3
Alternaria_arbusti	0.9389	0.8176	99.3	0.9621	0.8228	99.4	98.3
Alternaria_conjuncta	0.9423	0.8244	99.8	0.9602	0.8298	99.4	98.4
Alternaria_ethzedia	0.9302	0.8104	99.7	0.9509	0.8248	99.2	97.1
Alternaria_hordeiaustralica	0.9243	0.7948	99.7	0.9444	0.8026	99.6	98.1
Alternaria_incomplexa	0.9215	0.7944	99.6	0.9491	0.8041	99.2	97.7
Alternaria_infectoria	0.9245	0.7892	99.9	0.9446	0.8043	99.4	97.3
Alternaria_metachromatica	0.9216	0.797	99.8	0.9417	0.8053	99.4	96.7
Alternaria_novae-zelandiae	0.9271	0.8011	99.7	0.9467	0.8186	99.6	97.9
Alternaria_postmessia	0.9418	0.8409	99.5	0.9529	0.7556	98.6	98.4
Alternaria_triticimaculans	0.9297	0.8031	99.6	0.9495	0.8263	99.6	98.1
Alternaria_ventricosa	0.9238	0.7972	99.8	0.9462	0.8071	99.3	97.6
Alternaria_viburni	0.9446	0.8235	99.7	0.9624	0.8271	99.4	98
Apiospora_hydei	0.9398	0.7919	95.7	0.9172	0.737	94.6	96.7
Apiospora_kogelbergensis	0.9435	0.812	96.7	0.9018	0.727	95.1	98
Apiospora_phragmitis	0.9326	0.7727	96.4	0.9035	0.7068	92.2	95.9
Arthroderma_uncinatum	0.9472	0.8057	99.2	0.9475	0.8325	97.9	93.2
Arxiozyma_heterogenica	0.9805	0.9003	91.6	0.8894	0.7564	82.6	93.4
Ascoidea_rubescens	0.6984	0.5524	65.6	0.1845	0.1568	9.5	90.6
Aspergillus_aculeatinus	0.9547	0.8518	99.3	0.9285	0.7585	96	99.6
Aspergillus_affinis	0.9535	0.8225	98.9	0.9007	0.7556	95.2	98
Aspergillus_bombycis	0.9748	0.8669	98.8	0.9494	0.8367	95.5	98.5
Aspergillus_costaricensis	0.9634	0.8708	99.6	0.8813	0.7045	95.4	99.5
Aspergillus_eucalypticola	0.9564	0.8561	99.5	0.8779	0.6872	94.4	98.9
Aspergillus_flavus	0.976	0.8495	98.8	0.8152	0.6071	81	98.3
Aspergillus_fumigatus	0.9687	0.8919	99.5	0.9505	0.8311	96	98.5
Aspergillus_luchuensis	0.9761	0.8759	99.4	0.8917	0.6932	94.8	98.3
Aspergillus_melleus	0.9537	0.8057	99.6	0.9347	0.7442	95.7	96
Aspergillus_mulundensis	0.9769	0.8883	100	0.9789	0.8697	99.2	97.6
Aspergillus_nidulans	0.9462	0.8652	99.2	0.9386	0.7936	97.5	96.2
Aspergillus_niger	0.935	0.7819	96.3	0.8481	0.5949	91.7	94.8
Aspergillus_nomiae	0.9681	0.8119	97.6	0.8186	0.5839	78.5	98.2
Aspergillus_novofumigatus	0.9501	0.8487	98.4	0.9268	0.7742	94.6	98.7
Aspergillus_ochraceoroseus	0.9574	0.841	99	0.9362	0.7732	97.1	98.6
Aspergillus_oryzae	0.9264	0.7243	99.4	0.805	0.542	81.4	93
Aspergillus_pseudonomiae	0.9488	0.8518	98.8	0.8021	0.603	83.1	99.8
Aspergillus_pseudotamarii	0.9514	0.8526	99.6	0.799	0.5901	81.6	98.7
Aspergillus_pseudoviridinutans	0.9814	0.9093	99.7	0.9632	0.8692	97.6	99.3
Aspergillus_ruber	0.9531	0.8394	98.8	0.9311	0.7547	98	99.2
Aspergillus_tanneri	0.9541	0.8141	99.3	0.8206	0.6163	80.7	97.8
Aspergillus_terreus	0.9608	0.8144	99.3	0.9389	0.7229	98	93.3
Aspergillus_thermomutatus	0.9595	0.8411	98.5	0.9552	0.8491	95.7	95.3
Aspergillus_welwitschiae	0.9451	0.8103	99.6	0.8568	0.6392	94.1	98.5
Aureobasidium_subglaciale	0.9493	0.8565	99.6	0.9044	0.7396	97.1	99.6
Bacidia_gigantensis	0.9371	0.7315	96.3	0.6945	0.4855	51.9	91.1
Baudoinia_panamericana	0.9213	0.7272	99	0.8427	0.5822	90.9	97.6
Bipolaris_maydis	0.9588	0.8288	99.6	0.9403	0.7792	98.8	98.5
Bipolaris_sorokiniana	0.9472	0.8224	99.6	0.9277	0.7517	99.2	99.4
Blastomyces_dermatitidis	0.939	0.7984	98.5	0.9319	0.781	97.1	97.6
Blastomyces_gilchristii	0.9448	0.7964	99.3	0.9386	0.7856	97.3	98.3
Brettanomyces_bruxellensis	0.9819	0.8963	89.1	0.7659	0.6551	59.1	91
Brettanomyces_nanus	0.9662	0.86	92.4	0.9318	0.8331	83.5	89.5
Cadophora_gregata	0.9613	0.8562	99.6	0.9356	0.7889	98.3	97.7
Candida_dubliniensis	0.9189	0.7899	82.8	0.9169	0.7727	83.5	88.3
Candida_margitis	0.9855	0.8444	91.7	0.9853	0.9285	95.4	94.9
Candida_oxycetoniae	0.9763	0.8485	89.6	0.9697	0.8837	91.2	93.1
Candida_pseudojiufengensis	0.7157	0.6472	58.6	0.6669	0.5349	51.1	95.3
Candida_theae	0.9851	0.8813	94	0.9846	0.9258	94.6	94.6
Candida_tropicalis	0.9541	0.8466	83.9	0.9474	0.8447	86.5	92.4
Cantharellus_anzutake	0.6653	0.4646	88	0.6216	0.3787	82.1	93.5
Ceraceosorus_guamensis	0.8991	0.7222	84.3	0.2	0.1408	7.1	92
Cercospora_beticola	0.9847	0.8748	98.9	0.978	0.8979	98.8	99.6
Chaetomium_globosum	0.8904	0.7274	91.9	0.8785	0.6677	90.6	88.3
Cladophialophora_immunda	0.8666	0.7814	99.4	0.8356	0.7291	95.2	98.4
Coccidioides_posadasii	0.9619	0.8653	99	0.9624	0.855	98.4	98
Colletotrichum_abscissum	0.9611	0.8085	99.2	0.9345	0.7675	99.8	99.8
Colletotrichum_aenigma	0.9297	0.8291	99.2	0.9432	0.8309	99.6	98.2
Colletotrichum_chrysophilum	0.8828	0.7506	98	0.9395	0.7889	99.4	98.8
Colletotrichum_costaricense	0.9618	0.8016	99.3	0.9345	0.7577	99.8	99.7
Colletotrichum_destructivum	0.9563	0.8698	98.8	0.9448	0.8241	99.8	99.9
Colletotrichum_fioriniae	0.9127	0.7673	98.7	0.9476	0.8192	99.1	97.5
Colletotrichum_fructicola	0.9411	0.8307	99.1	0.9462	0.8257	99.4	99.2
Colletotrichum_gloeosporioides	0.9544	0.8091	99.7	0.9418	0.7854	99.6	98.7
Colletotrichum_higginsianum	0.9646	0.8533	99.5	0.9557	0.8361	99.6	98.7
Colletotrichum_lupini	0.887	0.6598	99.8	0.8633	0.6449	99.7	98.6
Colletotrichum_scovillei	0.958	0.8938	98.9	0.9438	0.836	99.6	98.7
Colletotrichum_siamense	0.9229	0.8379	99.4	0.934	0.84	99.4	98.5
Colletotrichum_spaethianum	0.9074	0.7217	96.1	0.9341	0.7538	96.5	90.3
Colletotrichum_truncatum	0.9518	0.8388	99.7	0.8898	0.7455	97.9	97.1
Coniophora_puteana	0.8793	0.7168	97.5	0.8668	0.6132	92.8	95
Coprinopsis_cinerea	0.9383	0.8084	97.3	0.9321	0.7524	95.8	96.4
Cordyceps_fumosorosea	0.9074	0.7889	89.3	0.9648	0.8543	98.8	97.6
Cordyceps_militaris	0.9372	0.8436	97.6	0.933	0.8123	98.9	95.8
Cryphonectria_parasitica	0.8985	0.7119	99.1	0.8939	0.6965	99.4	94.2
Cryptococcus_depauperatus	0.9724	0.8553	94.3	0.4432	0.3307	25.8	94.8
Cutaneotrichosporon_cavernicola	0.9577	0.8763	87.6	0.9113	0.7423	75	97
Cutaneotrichosporon_oleaginosum	0.8939	0.6993	80.7	0.859	0.6248	74.6	90.9
Dacryopinax_primogenitus	0.8795	0.7051	96.3	0.8606	0.5615	91.1	95
Daldinia_childiae	0.9289	0.8185	98.7	0.9383	0.8285	98	96.5
Daldinia_loculata	0.9651	0.9215	100	0.9629	0.9019	99.6	99.4
Diaporthe_batatas	0.9439	0.866	99	0.9454	0.8466	99.7	98
Diaporthe_citri	0.9591	0.8008	99	0.9693	0.8412	98.9	99.2
Didymosphaeria_variabile	0.9426	0.7854	98.5	0.9577	0.8091	97.6	97.6
Diplodia_seriata	0.8911	0.721	93.8	0.9451	0.7948	98.1	95.2
Dissoconium_aciculare	0.9276	0.7719	98.8	0.9052	0.5849	96.6	98.3
Diutina_rugosa	0.9723	0.8929	88.4	0.4812	0.2257	20.4	89.7
Emericellopsis_cladophorae	0.9502	0.8149	99.2	0.9706	0.8843	98.5	97.4
Endocarpon_pusillum	0.9595	0.8257	95.4	0.8539	0.6954	80.7	92.9
Epithele_typhae	0.7388	0.5975	84.9	0.7588	0.5065	88.2	96.4
Eremomyces_bilateralis	0.9168	0.7716	96.1	0.8514	0.6563	90.7	97.8
Eremothecium_cymbalariae	0.9939	0.7932	90.2	0.9904	0.9217	94	92.4
Exophiala_bonariae	0.9682	0.8855	99.3	0.9347	0.8311	94.5	98.2
Exophiala_mesophila	0.9021	0.8511	99.6	0.8768	0.7844	95.8	98.6
Exserohilum_turcicum	0.9512	0.8331	98.6	0.9313	0.7861	98.1	97.3
Fibroporia_radiculosa	0.9387	0.7849	95.1	0.9085	0.6407	84.3	93
Filobasidium_floriforme	0.8872	0.7469	90.1	0.6846	0.4291	42.7	95
Fomitopsis_serialis	0.7182	0.5589	90.4	0.7074	0.445	87.6	93.2
Fonsecaea_monophora	0.9773	0.8878	98.5	0.9645	0.8825	96.8	97.6
Fonsecaea_nubica	0.9816	0.8894	99.3	0.9668	0.8808	95.9	97.5
Fonsecaea_pedrosoi	0.9884	0.9173	98.9	0.9639	0.8745	96.3	99.3
Fusarium_coffeatum	0.9692	0.884	99.5	0.9752	0.908	99.6	98
Fusarium_falciforme	0.9333	0.8651	99.6	0.9403	0.8679	99.6	97.3
Fusarium_flagelliforme	0.9581	0.8932	99.7	0.9452	0.838	99.5	99.5
Fusarium_graminearum	0.9555	0.8442	99.2	0.9423	0.8073	99.2	98.3
Fusarium_keratoplasticum	0.9381	0.8782	99.1	0.9416	0.8666	99.6	97.4
Fusarium_musae	0.9566	0.8263	100	0.9652	0.8162	99.8	98.9
Fusarium_oxysporum	0.9254	0.793	98.3	0.8962	0.7421	97.9	97.8
Fusarium_poae	0.9543	0.8642	100	0.9442	0.8519	99.4	99.8
Fusarium_solani	0.938	0.8279	98.4	0.9379	0.8286	99	98.7
Fusarium_tjaetaba	0.9729	0.8786	99.5	0.9749	0.9071	99.4	98.7
Geosmithia_morbida	0.9663	0.8465	97.8	0.9564	0.8029	97.8	98.8
Glarea_lozoyensis	0.98	0.8913	98.5	0.866	0.6819	84.4	99.1
Guyanagaster_necrorhizus	0.8778	0.6891	97.1	0.8773	0.6461	96.5	98.5
Henningerozyma_blattae	0.9531	0.902	88	0.8512	0.7177	71.6	94
Hirsutella_rhossiliensis	0.8682	0.7444	99.4	0.8962	0.6989	99.6	98.7
Histoplasma_capsulatum	0.9378	0.805	98	0.9223	0.7622	93.9	96.3
Huiozyma_naganishii	0.9915	0.7591	87.7	0.9736	0.8807	87.3	95.2
Hyaloscypha_bicolor	0.9094	0.7367	99.3	0.8806	0.6654	97.4	98.7
Jaminaea_rosea	0.9087	0.5485	79.9	0.4107	0.2545	21.1	88
Kalmanozyma_brasiliensis	0.9885	0.755	94.6	0.7475	0.5508	62.8	98.6
Knufia_obscura	0.9746	0.8613	98	0.9084	0.7755	89.4	98
Kwoniella_dendrophila	0.952	0.5972	78.1	0.8846	0.7086	67.2	96.7
Kwoniella_pini	0.9476	0.6997	81.2	0.8974	0.7347	73.1	98.1
Lachancea_lanzarotensis	0.9893	0.4048	95.6	0.972	0.4129	94.9	45.8
Lachnellula_hyalina	0.8728	0.7622	98.8	0.8485	0.6717	93.1	96.1
Leptographium_clavigerum	0.9527	0.8151	97.8	0.9379	0.7978	94	97
Letharia_columbiana	0.9562	0.7688	96.7	0.8287	0.6014	78.5	96.9
Letharia_lupina	0.9586	0.8094	97.9	0.8381	0.6633	79.5	98.2
Lichtheimia_ornata	0.9358	0.8442	96.2	0.9508	0.8166	94.7	99.3
Lipomyces_arxii	0.9618	0.9105	96.4	0.9507	0.8168	90.8	97.5
Lithohypha_guttulata	0.9559	0.8373	98	0.8614	0.7338	76.9	93.2
Lodderomyces_beijingensis	0.9821	0.94	94.1	0.9794	0.9242	91.7	94.6
Lodderomyces_elongisporus	0.9703	0.9275	93.7	0.9594	0.9162	93.4	93.7
Malassezia_globosa	0.9592	0.7056	89.4	0.1044	0.0506	2.1	78.1
Malassezia_japonica	0.6973	0.5991	60	0.8419	0.575	63.7	94.6
Malassezia_pachydermatis	0.9212	0.7202	84.8	0.2281	0.1508	8.6	93.7
Malassezia_restricta	0.9242	0.6838	81	0.3494	0.2168	17	95.3
Malassezia_sympodialis	0.7409	0.5479	63.5	0.5247	0.3526	29.2	79.9
Malassezia_vespertilionis	0.8495	0.6917	71.5	0.3331	0.1758	10.4	93.1
Marasmius_oreades	0.9033	0.7473	96.1	0.8841	0.7083	95.5	96.7
Maudiozyma_barnettii	0.9861	0.9172	92.6	0.942	0.8593	90.3	95.9
Meira_miltonrushii	0.932	0.7801	92.5	0.0002	0	0	94.3
Melampsora_laricis-populina	0.6552	0.4765	76.7	0.424	0.2307	17.1	90.3
Metarhizium_acridum	0.9393	0.7391	99.2	0.9346	0.728	97.7	94.6
Metarhizium_album	0.9622	0.8612	98.6	0.9685	0.8627	98.3	97.7
Metarhizium_anisopliae	0.9441	0.7536	99.2	0.941	0.7346	97.7	92
Metschnikowia_bicuspidata	0.9337	0.7673	91.7	0.9226	0.7718	90	92.9
Meyerozyma_guilliermondii	0.976	0.7789	92.6	0.761	0.3309	46.6	92.1
Microdochium_trichocladiopsis	0.9116	0.7654	98.1	0.9029	0.7263	99.6	99
Microsporum_canis	0.9612	0.8876	98.8	0.9497	0.8403	95.6	98.6
Mixia_osmundae	0.9318	0.7291	88.6	0.86	0.5995	56.4	94.6
Moesziomyces_antarcticus	0.9576	0.8195	93.7	0.8711	0.6645	88.6	97.7
Morchella_sextelata	0.904	0.7835	99.2	0.9097	0.791	97.7	97.5
Mycena_indigotica	0.7712	0.6348	94.6	0.7118	0.5528	92.1	94.7
Naumovozyma_castellii	0.9898	0.8579	92.2	0.963	0.8742	93.6	97.2
Neurospora_hispaniola	0.9476	0.8363	99.6	0.9171	0.7559	99.3	99.1
Neurospora_tetrasperma	0.9423	0.8011	99.7	0.9094	0.7262	98.9	96.6
Ogataea_angusta	0.9709	0.792	94.2	0.9588	0.8671	91.3	92.6
Ogataea_haglerorum	0.9683	0.7712	91.6	0.9573	0.855	89.8	90.9
Ogataea_parapolymorpha	0.9881	0.827	93.4	0.9685	0.9029	89.6	94.1
Ogataea_philodendri	0.877	0.6396	93.1	0.8705	0.6963	92.1	93.9
Ogataea_polymorpha	0.9092	0.7571	93.9	0.8976	0.8163	88	90.1
Ophidiomyces_ophidiicola	0.9821	0.8944	99.3	0.9735	0.8658	95.6	97.7
Orbilia_oligospora	0.9852	0.9022	98.5	0.9441	0.8053	93.8	98.2
Paracoccidioides_brasiliensis	0.9625	0.8275	98.5	0.9411	0.7771	94.9	98.3
Paracoccidioides_lutzii	0.959	0.8164	97.9	0.9419	0.7758	95	98.9
Parastagonospora_nodorum	0.9246	0.7033	98.6	0.9258	0.661	97.9	94.2
Penicilliopsis_zonata	0.9555	0.8572	99.6	0.9389	0.7962	97.1	99.4
Penicillium_antarcticum	0.966	0.8723	99.4	0.9463	0.8335	99.4	99.8
Penicillium_arizonense	0.9524	0.8442	99.5	0.9493	0.8392	99.7	98.6
Penicillium_canescens	0.9201	0.8056	98.4	0.9064	0.7866	98.6	98.6
Penicillium_chermesinum	0.9522	0.8244	97.3	0.938	0.7825	93.6	97.5
Penicillium_citrinum	0.9682	0.8548	96.7	0.8809	0.7301	95.4	98.7
Penicillium_cosmopolitanum	0.948	0.8186	97.5	0.9068	0.7597	95.7	97.9
Penicillium_crustosum	0.9736	0.8686	98	0.9467	0.8268	98.3	98.8
Penicillium_diatomitis	0.9636	0.8678	99.1	0.9616	0.8609	98.3	99.4
Penicillium_hordei	0.9712	0.8682	98.3	0.9454	0.8269	98.6	99.5
Penicillium_lagena	0.9574	0.844	99.2	0.9457	0.8038	99	98.3
Penicillium_longicatenatum	0.9719	0.8818	99.6	0.9422	0.8299	98.6	99.8
Penicillium_maclennaniae	0.9611	0.8393	98.4	0.9512	0.8098	95.1	97.5
Penicillium_manginii	0.9562	0.8313	98.1	0.9171	0.7759	96.8	98.7
Penicillium_mononematosum	0.9697	0.8507	98.1	0.9449	0.8079	96.2	98.7
Penicillium_riverlandense	0.9772	0.8749	99.2	0.9637	0.8406	99.4	98.5
Penicillium_rubens	0.9732	0.8729	98.7	0.9703	0.8566	99.2	99.7
Penicillium_samsonianum	0.9634	0.8457	98.9	0.9335	0.801	98.5	98.7
Penicillium_verrucosum	0.9726	0.8606	97.6	0.9511	0.832	98.2	99.2
Penicillium_vulpinum	0.9757	0.8764	98.8	0.9437	0.8266	98.5	99.7
Penicillium_waksmanii	0.9546	0.8366	98.3	0.9184	0.7791	96.8	98.3
Pestalotiopsis_fici	0.9792	0.9125	99.6	0.9758	0.9093	99.6	98.5
Phaeoacremonium_minimum	0.6968	0.553	99.4	0.8844	0.7089	85.3	89.1
Phanerochaete_carnosa	0.8593	0.639	96.8	0.861	0.5563	94.6	89
Phialemonium_atrogriseum	0.9401	0.8388	95.5	0.9123	0.7259	96.1	98.7
Phialophora_attinorum	0.9627	0.8228	95.3	0.9289	0.8024	89.7	90.4
Pichia_kudriavzevii	0.9926	0.8965	87.6	0.5206	0.5204	42.4	90.3
Pichia_membranifaciens	0.9368	0.724	88	0.8025	0.6684	70.7	89.9
Pisolithus_orientalis	0.7602	0.5865	93.2	0.7065	0.4528	90	98
Pneumocystis_carinii	0.7652	0.6657	54.5	0.0035	0	0	90.9
Pneumocystis_jirovecii	0.6897	0.5964	49.9	0.0103	0.0058	0.3	90.7
Pneumocystis_murina	0.7841	0.6852	57.8	0.0022	0	0	90.3
Pochonia_chlamydosporia	0.9407	0.8205	99.2	0.8312	0.6413	93.9	97.7
Podospora_anserina	0.9482	0.7733	93.8	0.7967	0.5063	79.6	96.3
Podospora_bellae-mahoneyi	0.9459	0.8354	96.5	0.7878	0.5254	82.3	97.9
Podospora_pseudoanserina	0.9452	0.8334	95.8	0.7873	0.5222	80.2	97.5
Podospora_pseudocomata	0.9417	0.8332	96.7	0.7797	0.5222	82.3	98.5
Podospora_pseudopauciseta	0.9485	0.8419	97.3	0.7991	0.5398	83	98.6
Protomyces_lactucae-debilis	0.8924	0.6888	94.6	0.7122	0.4686	63.5	93.8
Pseudogymnoascus_destructans	0.9118	0.7808	99	0.8874	0.7492	98.8	98.6
Pseudomicrostroma_glucosiphilum	0.9144	0.6798	85.6	0.2502	0.1911	13.1	90.2
Pseudovirgaria_hyperparasitica	0.9434	0.8441	98.6	0.8158	0.6365	80.2	98.2
Puccinia_graminis	0.8107	0.637	79.9	0.677	0.4502	48.6	90.1
Puccinia_striiformis	0.7633	0.5741	68.9	0.624	0.3994	34.3	92.3
Puccinia_triticina	0.6525	0.4839	80.3	0.5429	0.3484	55.7	91.3
Punctularia_strigosozonata	0.8608	0.6971	93.3	0.8394	0.5197	92.4	95.3
Pyrenophora_tritici-repentis	0.8533	0.686	99.4	0.8876	0.6824	99.1	92.6
Rasamsonia_emersonii	0.9359	0.749	97.6	0.9406	0.738	96	92.6
Recurvomyces_mirabilis	0.9741	0.8534	98.7	0.8603	0.657	82.9	97.8
Rhinocladiella_mackenziei	0.9776	0.8739	98.8	0.8821	0.7518	88.2	99.6
Rhizoctonia_solani	0.8688	0.6668	91.5	0.886	0.6721	81.7	85
Rhodofomes_roseus	0.8928	0.7672	96.6	0.886	0.6506	97.1	99.4
Rhodotorula_graminis	0.4091	0.1562	24.1	0.8928	0.7152	94.2	94.4
Saccharomyces_eubayanus	0.9781	0.8321	91	0.97	0.9066	95.3	94.5
Saccharomycodes_ludwigii	0.9778	0.9207	88.7	0.1407	0.1126	7	90.1
Saccharomycopsis_crataegensis	0.9637	0.9233	92.4	0.6519	0.5933	60.4	93.4
Saxophila_tyrrhenica	0.9739	0.8672	98.8	0.9562	0.5753	91.9	98.3
Scedosporium_apiospermum	0.8487	0.728	99.2	0.8354	0.6917	92.3	85.3
Scheffersomyces_coipomensis	0.8951	0.8724	85.5	0.4372	0.232	23.9	95
Scheffersomyces_spartinae	0.9713	0.8766	93.5	0.894	0.631	75.3	94.1
Schizophyllum_commune	0.8954	0.7186	95	0.9001	0.6571	96.1	98.7
Schizosaccharomyces_osmophilus	0.9902	0.9378	96	0.9655	0.8699	89.9	96.6
Sclerotinia_sclerotiorum	0.9108	0.6573	97.3	0.908	0.6663	96.3	91.7
Serpula_lacrymans	0.8014	0.5719	96.7	0.7974	0.5142	93.3	90.1
Spathaspora_passalidarum	0.9397	0.8349	96.7	0.8985	0.6645	85.2	93.3
Sporisorium_graminicola	0.9791	0.1258	97.3	0.6872	0.0751	63	15
Sporothrix_brasiliensis	0.929	0.8321	91.2	0.9552	0.8526	97.4	96.2
Sporothrix_schenckii	0.9371	0.8291	91.2	0.9378	0.787	97.9	98.5
Sugiyamaella_lignohabitans	0.9089	0.7414	93.2	0.8617	0.6937	85.1	82
Suillus_discolor	0.8033	0.6334	96.1	0.782	0.5581	95	98.2
Suillus_subaureus	0.7831	0.5841	96.1	0.7663	0.5198	94	97.5
Talaromyces_amestolkiae	0.9532	0.8127	99.4	0.9623	0.8359	99	97.9
Talaromyces_atroroseus	0.9719	0.8495	99.3	0.972	0.8674	98.7	97.9
Talaromyces_marneffei	0.9768	0.9169	100	0.9739	0.8928	99.1	98.7
Talaromyces_rugulosus	0.97	0.8272	99.2	0.9728	0.8472	99.6	98.3
Tetrapisispora_phaffii	0.9883	0.9103	91.5	0.9319	0.8457	88.5	96
Thermochaetoides_thermophila	0.9528	0.8507	98.9	0.9054	0.7677	93	97.8
Thermothelomyces_thermophilus	0.9473	0.8268	99.2	0.9476	0.8039	99.6	97
Thermothielavioides_terrestris	0.9379	0.8059	98.7	0.9387	0.7775	99.6	97.8
Thyridium_curvatum	0.9385	0.8281	88	0.9749	0.8934	99.2	98.4
Tilletiaria_anomala	0.9052	0.758	91.2	0.3974	0.2421	20.3	93.5
Tilletiopsis_washingtonensis	0.6625	0.4691	50.8	0.8205	0.6056	74.2	90.9
Tremella_mesenterica	0.8126	0.4621	70.5	0.2415	0.1239	12	95.4
Tricharina_praecox	0.9091	0.7767	95.9	0.8922	0.7155	95.7	96.7
Trichoderma_asperellum	0.9647	0.8631	99.2	0.7238	0.5575	82.3	98.6
Trichoderma_atroviride	0.9509	0.7681	98.3	0.7618	0.5478	86.4	91.2
Trichoderma_citrinoviride	0.9561	0.854	95.3	0.9269	0.7794	96.1	97.3
Trichoderma_gamsii	0.9579	0.8497	99.1	0.7503	0.5901	87.4	95.5
Trichophyton_benhamiae	0.9587	0.8062	98.5	0.9525	0.7959	97.2	91.8
Trichophyton_rubrum	0.9443	0.7577	97.3	0.9372	0.7443	95.4	86.9
Trichophyton_verrucosum	0.9552	0.7776	98.5	0.9525	0.764	97.8	91.6
Trichosporon_asahii	0.9268	0.7783	88.4	0.89	0.7105	83.6	81
Tuber_melanosporum	0.7614	0.6309	97.6	0.7311	0.5587	95.6	93.2
Uncinocarpus_reesii	0.9575	0.787	97	0.956	0.774	94.5	88.3
Vanderwaltozyma_polyspora	0.9545	0.8741	92.1	0.9325	0.8467	90.7	93.1
Vanrija_pseudolonga	0.899	0.74	83.6	0.9283	0.7936	88.5	95.5
Verruconis_gallopava	0.9474	0.8902	98.5	0.9163	0.7869	93.7	98
Verticillium_alfalfae	0.9121	0.7524	75.2	0.9118	0.6673	79.3	75.8
Verticillium_dahliae	0.9353	0.8371	85.7	0.9321	0.7447	93.1	94.2
Verticillium_nonalfalfae	0.94	0.8367	85	0.9578	0.7872	92.7	94.2
Wallemia_ichthyophaga	0.9653	0.8151	86.4	0.8302	0.5692	54.7	88.2
Wallemia_mellicola	0.9206	0.7939	91.3	0.6479	0.3889	36.5	93
Wickerhamiella_sorbophila	0.9812	0.8257	90.4	0.9623	0.9072	87.1	91.8
Wickerhamomyces_ciferrii	0.8085	0.7716	64.9	0.9342	0.7748	91.5	96.7
Xylona_heveae	0.953	0.8626	98.8	0.6666	0.5077	69.1	99.8
Yamadazyma_tenuis	0.967	0.8143	94.3	0.8238	0.4757	58.5	94.3
Zygosaccharomyces_rouxii	0.9929	0.8366	93.3	0.9853	0.9387	96.2	97.9
Zymoseptoria_tritici	0.878	0.6654	98.7	0.854	0.5053	98.3	98.1

## Sheet: Table 2
Supplementary Table 2. The performance evaluation of ANNEVO and Augustus on Embryophyta lineage of RefSeq.
Species name	ANNEVO_NT(CDS)_f1	ANNEVO_gene_f1	ANNEVO_BUSCO	Augustus_NT(CDS)_f1	Augustus_gene_f1	Augustus_BUSCO	RefSeq_BUSCO
Abrus_precatorius	0.9187	0.8763	97	0.7801	0.6195	91	99.1
Actinidia_eriantha	0.8775	0.7792	93.9	0.7415	0.5284	79.3	97.9
Aegilops_tauschii	0.7532	0.6097	94.8	0.4005	0.2272	62.6	99.4
Amaranthus_tricolor	0.8669	0.7815	95.6	0.6537	0.3887	73.2	98.5
Amborella_trichopoda	0.8855	0.7104	84.7	0.6706	0.352	61.1	98.2
Ananas_comosus	0.902	0.7894	91.9	0.6968	0.4198	34.1	99
Andrographis_paniculata	0.9134	0.8572	96.1	0.7536	0.5792	86.2	98.9
Arabidopsis_thaliana	0.9397	0.8706	97.3	0.8619	0.7359	97.9	99.5
Arachis_duranensis	0.8223	0.7035	95.7	0.5029	0.3026	94.9	97.4
Arachis_ipaensis	0.793	0.6406	94.2	0.471	0.2672	93.6	95.1
Arachis_stenosperma	0.8222	0.7154	97.7	0.4918	0.2992	96.1	99.3
Argentina_anserina	0.8989	0.8443	86.8	0.7826	0.6106	81.6	92.5
Benincasa_hispida	0.9064	0.8027	94.7	0.5016	0.2664	80.5	99
Beta_vulgaris	0.8348	0.7206	93.6	0.5626	0.3201	71.7	97.8
Brachypodium_distachyon	0.9023	0.836	96.3	0.7257	0.5218	70.8	99.5
Brassica_napus	0.8461	0.7831	99.3	0.658	0.5252	99.2	99.5
Brassica_oleracea	0.8233	0.6945	98.3	0.5795	0.4139	98.2	99.5
Brassica_rapa	0.8789	0.8377	98.1	0.7426	0.6302	98.3	99.3
Cajanus_cajan	0.8661	0.7272	94.6	0.6487	0.4484	88.9	98.2
Camellia_sinensis	0.7288	0.5156	89.3	0.4269	0.2325	73.1	95.2
Cannabis_sativa	0.8182	0.7288	97.4	0.5139	0.346	93.1	99.2
Capsicum_annuum	0.786	0.5767	91.3	0.4472	0.222	79.7	97.1
Carica_papaya	0.9072	0.7677	76.6	0.7972	0.5186	60.5	79.5
Chenopodium_quinoa	0.8064	0.6971	98.4	0.5729	0.3248	84.6	99.5
Cicer_arietinum	0.9069	0.8201	97.1	0.7676	0.5757	91.8	99.7
Citrus_sinensis	0.8737	0.8321	97.9	0.6895	0.5388	94.5	99.7
Citrus_x_clementina	0.8891	0.8179	97.4	0.7044	0.5303	93.8	99.4
Coffea_arabica	0.8241	0.7343	97	0.6356	0.4626	91.8	98.2
Cornus_florida	0.8284	0.7029	95.6	0.5606	0.35	76.9	99.5
Corylus_avellana	0.888	0.7967	97	0.7146	0.5082	89.1	98.4
Cryptomeria_japonica	0.7659	0.4936	39.5	0.3608	0.1648	17.2	94.6
Cucumis_melo	0.9149	0.8439	95.7	0.6385	0.4227	85.6	98.9
Cucurbita_pepo	0.9295	0.8337	96	0.8692	0.6675	93.1	98.8
Cynara_cardunculus	0.8861	0.7896	93.6	0.6859	0.4929	85.7	99.1
Daucus_carota	0.8639	0.7858	95.8	0.7285	0.5728	88.8	99.5
Dendrobium_catenatum	0.7198	0.4013	70.3	0.5187	0.2683	51.1	91.2
Dioscorea_cayenensis	0.8574	0.7468	93.2	0.6219	0.3788	80.2	96.5
Diospyros_lotus	0.8721	0.8034	93.3	0.5558	0.3378	66.4	98.6
Durio_zibethinus	0.8781	0.7915	97.4	0.8261	0.637	92	98.9
Elaeis_guineensis	0.8899	0.7159	89.1	0.7001	0.3997	61	97.1
Erigeron_canadensis	0.8806	0.7969	95.5	0.6824	0.5033	83.2	99.1
Erythranthe_guttata	0.8678	0.7826	96	0.7355	0.5297	83.6	98.3
Eucalyptus_grandis	0.836	0.7056	94.5	0.7158	0.4757	84.5	98.5
Eutrema_salsugineum	0.8836	0.8328	97.2	0.6889	0.5493	96.9	99.5
Fragaria_vesca	0.8646	0.7771	97.3	0.7553	0.5786	94.6	96.5
Gastrolobium_bilobum	0.853	0.7751	96.3	0.5845	0.4256	86.7	98.9
Glycine_max	0.8906	0.8029	98.7	0.655	0.4565	93.4	99.7
Glycine_soja	0.8872	0.7994	98.6	0.6508	0.454	93.3	99.7
Gossypium_arboreum	0.8885	0.7911	96.1	0.6098	0.3823	92.5	98
Gossypium_raimondii	0.893	0.818	98.1	0.6367	0.4271	94.5	99.2
Helianthus_annuus	0.704	0.5778	89.9	0.4152	0.2828	85.8	98.7
Herrania_umbratica	0.9344	0.8629	90.5	0.8796	0.6833	86.5	94.5
Hibiscus_syriacus	0.7393	0.6607	95.7	0.5236	0.3452	92.1	95.8
Hordeum_vulgare	0.8139	0.6941	97	0.3928	0.1981	54.9	99.3
Humulus_lupulus	0.7509	0.6184	97.1	0.2843	0.1431	88.4	99.4
Impatiens_glandulifera	0.8906	0.8003	96.7	0.681	0.5025	87.7	98.6
Jatropha_curcas	0.9173	0.8339	87.4	0.71	0.4526	83.5	90.1
Juglans_regia	0.8884	0.8122	97.3	0.5869	0.3761	84	99.6
Lactuca_sativa	0.8144	0.691	96	0.4574	0.2784	85.8	99.3
Lolium_perenne	0.799	0.7055	96.7	0.4552	0.2647	73.4	99.4
Lolium_rigidum	0.805	0.7217	97.4	0.4492	0.262	76.2	98.6
Lotus_japonicus	0.831	0.7497	97	0.5693	0.3959	91.3	99.8
Lupinus_angustifolius	0.8997	0.8351	97.7	0.6677	0.4903	93.3	99.2
Lycium_ferocissimum	0.8325	0.7171	93.8	0.5197	0.3252	85.3	97.2
Macadamia_integrifolia	0.8756	0.7476	86.5	0.6817	0.3945	67	95.2
Magnolia_sinica	0.8222	0.598	76	0.5759	0.2939	61.6	98.1
Malania_oleifera	0.882	0.73	85.4	0.6122	0.3169	56.1	98.2
Malus_domestica	0.8766	0.7901	97.1	0.688	0.5038	92.1	98.1
Malus_sylvestris	0.8627	0.8078	98	0.6723	0.5202	94.1	99.3
Mercurialis_annua	0.8538	0.7952	97.2	0.6463	0.5038	94.7	99.4
Miscanthus_floridulus	0.7713	0.6666	95.9	0.4985	0.2637	66.8	97
Momordica_charantia	0.9182	0.8188	93.9	0.7206	0.4901	84.9	96.2
Morus_notabilis	0.8878	0.7343	94.8	0.6613	0.4427	87	98.2
Nicotiana_attenuata	0.7811	0.6585	95.4	0.3492	0.2057	88.2	99.1
Nicotiana_sylvestris	0.7863	0.601	93.1	0.39	0.2076	85.1	96.5
Nicotiana_tabacum	0.8105	0.6526	95.8	0.4093	0.2297	91.4	97.4
Nicotiana_tomentosiformis	0.8222	0.6544	92.5	0.4677	0.2701	85.1	96.1
Nymphaea_colorata	0.8912	0.7951	89.6	0.7132	0.4522	73	97.7
Olea_europaea	0.8216	0.6701	82.8	0.6239	0.4116	71.1	85.7
Oryza_glaberrima	0.8899	0.8209	95.6	0.7713	0.5652	72.4	99.3
Papaver_somniferum	0.7392	0.6077	97.4	0.4827	0.264	85.6	99.1
Phalaenopsis_equestris	0.8435	0.5197	62.6	0.62	0.2822	41.5	91.4
Phaseolus_vulgaris	0.9347	0.8124	96.6	0.6473	0.4514	91.2	96.7
Phoenix_dactylifera	0.8903	0.7896	91.5	0.6369	0.3893	60.4	98.3
Pistacia_vera	0.8421	0.7142	94.5	0.5577	0.3402	91.1	96.4
Populus_alba	0.9033	0.849	96.9	0.7764	0.6058	92.5	98.8
Populus_euphratica	0.9204	0.8561	96.9	0.8473	0.6674	94.3	98.9
Populus_nigra	0.9317	0.8814	97.4	0.7998	0.6321	93.2	98.9
Populus_trichocarpa	0.9061	0.8896	98	0.7861	0.6452	94	99.3
Prosopis_alba	0.8259	0.7419	95.7	0.6612	0.4653	92.1	98.7
Prosopis_cineraria	0.8638	0.7639	95.6	0.6874	0.4499	86.3	98.8
Prunus_avium	0.8775	0.7656	96.8	0.7604	0.5749	92.3	98.4
Prunus_dulcis	0.9035	0.8471	96.9	0.7665	0.6256	92.7	98.1
Prunus_mume	0.8947	0.7985	97	0.7819	0.5978	92	98.7
Punica_granatum	0.9076	0.8437	96.3	0.7948	0.618	91.4	99.1
Pyrus_x_bretschneideri	0.8968	0.8209	97.7	0.7588	0.5807	94.5	99.3
Quercus_lobata	0.8149	0.6966	96.3	0.5379	0.3481	87.2	98.3
Quercus_robur	0.7922	0.7229	97.5	0.5185	0.3562	87.6	99.6
Quercus_suber	0.8069	0.6443	86	0.5466	0.3277	77.8	88.6
Raphanus_sativus	0.8702	0.8099	98.2	0.7217	0.6011	97.7	99.5
Rhodamnia_argentea	0.8631	0.8384	95.4	0.7728	0.618	85.9	99.2
Rhododendron_vialii	0.8359	0.7498	94.7	0.6356	0.4528	86.1	98.9
Rosa_rugosa	0.8546	0.7665	97.8	0.6579	0.4785	92.4	98.8
Salvia_hispanica	0.8813	0.806	93.2	0.7384	0.5692	87	95.7
Salvia_miltiorrhiza	0.8182	0.7544	90.9	0.5715	0.426	87.1	94.1
Salvia_splendens	0.8637	0.7886	97.8	0.6361	0.4803	94.7	99.4
Selaginella_moellendorffii	0.7105	0.5105	61	0.7316	0.5	43.8	88.1
Sesamum_indicum	0.9186	0.8127	95.6	0.8011	0.6029	90.9	97.6
Setaria_italica	0.8961	0.8156	96.6	0.7473	0.5281	66.7	99.1
Setaria_viridis	0.8988	0.8202	97.4	0.7508	0.5373	68.2	99.2
Solanum_pennellii	0.8866	0.7968	96.7	0.5764	0.3469	87.9	99.1
Solanum_stenotomum	0.81	0.7498	95.4	0.5483	0.376	85.9	98.8
Solanum_tuberosum	0.8512	0.7371	95.1	0.5833	0.3731	87.2	98.1
Solanum_verrucosum	0.8221	0.7878	96.7	0.5654	0.3932	86.3	99.1
Sorghum_bicolor	0.8839	0.8095	97.2	0.6506	0.4385	63.1	99.5
Spinacia_oleracea	0.7658	0.6555	95.1	0.5406	0.3275	77.7	99.2
Tarenaya_hassleriana	0.9066	0.8214	95.9	0.7619	0.5962	95.6	99.3
Telopea_speciosissima	0.832	0.7236	87.3	0.5325	0.2972	63.9	98.4
Trifolium_pratense	0.8704	0.7997	98	0.7152	0.5824	94.6	99.7
Tripterygium_wilfordii	0.9008	0.843	97.5	0.7407	0.5408	94.6	99.6
Triticum_dicoccoides	0.753	0.6249	98.5	0.3596	0.1905	68.5	99.1
Triticum_urartu	0.7794	0.6526	89.3	0.3293	0.1678	58.3	91.7
Vigna_angularis	0.8925	0.831	96.4	0.6756	0.468	86.8	99
Vigna_radiata	0.894	0.8143	96.1	0.6919	0.4768	88.7	99.1
Vigna_unguiculata	0.894	0.8293	97.4	0.693	0.4977	92.3	99.7
Vitis_riparia	0.8844	0.7955	96.6	0.6625	0.4278	80.5	99.3
Zea_mays	0.828	0.7204	94.5	0.5135	0.2868	55.9	97.8
Zingiber_officinale	0.881	0.7841	95.8	0.6465	0.3809	62.4	99

## Sheet: Table 3
Supplementary Table 3. The performance evaluation of ANNEVO and Augustus on Invertebrate lineage of RefSeq.
Species name	ANNEVO_NT(CDS)_f1	ANNEVO_gene_f1	ANNEVO_BUSCO	Augustus_NT(CDS)_f1	Augustus_gene_f1	Augustus_BUSCO	RefSeq_BUSCO
Acropora_millepora	0.745	0.5547	78.2	0.7077	0.4728	84	96.8
Aethina_tumida	0.9095	0.7939	92.9	0.7276	0.3896	66	98.8
Anneissia_japonica	0.7383	0.4249	79.9	0.6238	0.2442	51.6	95.3
Anopheles_albimanus	0.9189	0.8009	93.9	0.8707	0.6271	92.9	98.7
Anopheles_gambiae	0.9023	0.7982	96	0.8268	0.6331	94	98.8
Anopheles_moucheti	0.9123	0.7977	93.5	0.8123	0.5877	91	98.2
Anthonomus_grandis	0.8115	0.588	82.7	0.5086	0.195	67.6	99.4
Bombus_pyrosoma	0.9123	0.7903	89.8	0.8095	0.4158	67.9	99.1
Bombyx_mori	0.8506	0.7141	89.8	0.6796	0.4326	63.7	98.9
Branchiostoma_belcheri	0.8306	0.6425	95	0.8072	0.5304	95.4	98.9
Caenorhabditis_briggsae	0.8285	0.4716	63.8	0.8068	0.3934	55.7	76.1
Caenorhabditis_elegans	0.8428	0.536	63.2	0.7944	0.4341	58.5	78.6
Caenorhabditis_remanei	0.8012	0.4949	65.5	0.7252	0.3949	56.3	73.8
Centruroides_vittatus	0.7599	0.5504	74.1	0.4383	0.1535	41.5	99.2
Coccinella_septempunctata	0.8222	0.6383	84.5	0.5581	0.2699	65.3	99.3
Colletes_gigas	0.9009	0.7749	89.8	0.6658	0.2979	28.3	98.9
Culicoides_brevitarsis	0.9	0.7961	89.5	0.8446	0.5797	81.2	96.1
Cydia_amplana	0.8049	0.6623	94.9	0.4312	0.1743	28.3	99
Diabrotica_virgifera	0.6476	0.3982	71.9	0.2898	0.0964	60.6	97.9
Drosophila_eugracilis	0.9312	0.8165	96.2	0.8685	0.6374	92.9	99.2
Drosophila_melanogaster	0.9287	0.8216	97.1	0.8655	0.6936	96.7	99.3
Drosophila_novamexicana	0.9283	0.8244	95.5	0.8563	0.6434	93.2	98.2
Drosophila_obscura	0.9109	0.7943	96.3	0.8267	0.6424	93.4	99.1
Drosophila_serrata	0.921	0.7979	96.3	0.8562	0.6389	94.4	99.1
Drosophila_subobscura	0.9151	0.8291	97.5	0.889	0.741	93.9	98.9
Drosophila_subpulchrella	0.9207	0.8051	97.4	0.7942	0.5915	96.1	99.2
Drosophila_takahashii	0.9224	0.8018	96.6	0.886	0.6993	96	98.4
Drosophila_yakuba	0.9333	0.8373	97.8	0.8746	0.6883	96.8	99.1
Eurosta_solidaginis	0.7264	0.5014	84.5	0.2755	0.1223	91.3	98.8
Eurytemora_carolleeae	0.7097	0.3479	48.9	0.5996	0.2254	37.1	88.4
Frieseomelitta_varia	0.9033	0.7615	87.3	0.7849	0.3807	83.5	98.7
Habropoda_laboriosa	0.9005	0.6965	89.9	0.7161	0.3058	85.7	99.1
Ixodes_scapularis	0.6635	0.4307	83.1	0.3827	0.1832	85.3	99.1
Leptidea_sinapis	0.8258	0.6731	89.8	0.6	0.3253	62	98.3
Leptinotarsa_decemlineata	0.8051	0.4751	73	0.5809	0.2029	61.6	92.2
Linepithema_humile	0.8563	0.7237	95.1	0.6818	0.3423	49.3	99.4
Lottia_gigantea	0.7373	0.4222	83	0.342	0.0918	9.1	96.6
Megachile_rotundata	0.8718	0.68	89.3	0.6267	0.2511	18	98.7
Mytilus_californianus	0.7284	0.5588	84.4	0.5726	0.2955	55.6	96.2
Orussus_abietinus	0.9048	0.7564	89.3	0.5737	0.1381	43.6	98.3
Pecten_maximus	0.799	0.6165	92.1	0.6527	0.3861	89.1	98.1
Pieris_napi	0.8904	0.7774	94.7	0.6669	0.3614	49.6	98.7
Ruditapes_philippinarum	0.8102	0.5971	89.4	0.7006	0.3896	72.7	96
Scylla_paramamosain	0.7782	0.4921	85	0.5717	0.238	64.8	97.5
Sphaeroforma_arctica	0.7732	0.3608	39	0.1865	0.0476	2.7	48.1
Topomyia_yanbarensis	0.7732	0.6146	91.1	0.5401	0.2991	89.9	98.5
Toxorhynchites_rutilus	0.7792	0.6245	91	0.5684	0.3402	89.2	98.9
Venturia_canescens	0.8616	0.7125	89.8	0.7126	0.3831	66.5	99.3
Vespula_pensylvanica	0.9155	0.7977	87	0.5921	0.2375	10.9	99.1
Vollenhovia_emeryi	0.8043	0.5985	92.7	0.729	0.4211	93.1	99.6

## Sheet: Table 4
Supplementary Table 4. The performance evaluation of ANNEVO and Augustus on Vertebrate_other lineage of RefSeq.
Species name	ANNEVO_NT(CDS)_f1	ANNEVO_gene_f1	ANNEVO_BUSCO	Augustus_NT(CDS)_f1	Augustus_gene_f1	Augustus_BUSCO	RefSeq_BUSCO
Archocentrus_centrarchus	0.892	0.8026	96.3	0.7404	0.4556	79.8	99.4
Aythya_fuligula	0.9196	0.8115	93.1	0.7785	0.4903	57.7	98.1
Betta_splendens	0.9287	0.8643	95.9	0.7783	0.4239	75.7	99.4
Calidris_pugnax	0.8859	0.6808	89.8	0.7922	0.4456	63.9	96.5
Calypte_anna	0.9158	0.8037	89.7	0.7628	0.4437	53.2	95.6
Carassius_carassius	0.8839	0.7744	96	0.652	0.3545	87.7	99.1
Caretta_caretta	0.8758	0.7151	93.1	0.7518	0.4291	64.6	99
Centrocercus_urophasianus	0.9219	0.8053	90	0.7759	0.4612	54.1	96.4
Chamaea_fasciata	0.9053	0.7871	93.2	0.7995	0.5119	66.4	98.5
Corapipo_altera	0.9128	0.7533	90.4	0.7874	0.4719	58.7	96.3
Coregonus_clupeaformis	0.8682	0.7154	95.2	0.7148	0.3608	80.1	99
Cottoperca_gobio	0.9293	0.8525	90.4	0.8528	0.558	78.7	93
Crotalus_tigris	0.8879	0.7446	88.5	0.7263	0.4108	56.3	98.7
Cyprinodon_tularosa	0.9052	0.7889	94.3	0.7097	0.4078	82.7	98.8
Cyprinus_carpio	0.8626	0.7452	95.6	0.6675	0.3224	87.7	98.7
Danio_rerio	0.8883	0.7459	93.3	0.7411	0.4203	85.9	96.8
Empidonax_traillii	0.9111	0.7574	89.7	0.7989	0.4948	61.3	95.6
Ficedula_albicollis	0.8836	0.6506	82.7	0.7467	0.3755	52.7	93.5
Gallus_gallus	0.8834	0.7564	92.4	0.7577	0.4493	57.2	98.1
Gasterosteus_aculeatus	0.9328	0.852	95.5	0.8247	0.5096	85.9	98.4
Gopherus_flavomarginatus	0.8659	0.7147	93.1	0.7279	0.4171	65.7	99.1
Haemorhous_mexicanus	0.8996	0.7785	92.9	0.7814	0.486	63.5	98.3
Haplochromis_burtoni	0.9085	0.779	93.7	0.8036	0.4749	78.8	97.7
Lagopus_muta	0.9034	0.7977	92.2	0.751	0.4493	56.3	97.7
Lampris_incognitus	0.8902	0.7585	89.4	0.6154	0.239	61	97.8
Larimichthys_crocea	0.9275	0.8355	97	0.8302	0.5307	90.6	99.6
Leucoraja_erinacea	0.8736	0.6561	83	0.694	0.3194	68	96.2
Malurus_melanocephalus	0.9132	0.7368	88.4	0.7757	0.4402	53.2	94.8
Melopsittacus_undulatus	0.9101	0.7849	93.6	0.7738	0.4779	57.3	99
Melospiza_melodia	0.9034	0.7788	93.8	0.8	0.5131	71.5	98.4
Micropterus_dolomieu	0.8982	0.7665	94.8	0.8054	0.4928	82.3	97.4
Molothrus_aeneus	0.912	0.8051	92.9	0.7855	0.4982	63.7	98.9
Nematolebias_whitei	0.8634	0.6473	84.9	0.3541	0.1136	68.6	91.6
Oncorhynchus_keta	0.8691	0.7249	93.6	0.6653	0.3193	76.7	98.5
Oncorhynchus_nerka	0.865	0.7277	94.2	0.6699	0.3171	76.2	98.7
Oryzias_latipes	0.9185	0.8212	93.4	0.7129	0.3902	82.4	98.2
Osmerus_mordax	0.9093	0.8279	93	0.781	0.4382	73.2	98
Oxyura_jamaicensis	0.9152	0.767	91.1	0.7701	0.4493	54.4	97.2
Parus_major	0.9163	0.7738	89.6	0.7854	0.4737	56.8	95.7
Plectropomus_leopardus	0.9023	0.6786	91.2	0.82	0.4429	82.1	93.9
Pogona_vitticeps	0.887	0.6901	86.8	0.7712	0.4247	62.1	98.1
Prinia_subflava	0.9045	0.7872	91.6	0.7849	0.4901	63.8	97
Serinus_canaria	0.913	0.8004	90.6	0.7759	0.4779	59.4	97
Simochromis_diagramma	0.8915	0.7997	95.6	0.7522	0.4588	80.2	98.9
Sphaeramia_orbicularis	0.9009	0.791	94.7	0.7638	0.4404	77	99.2
Syngnathus_typhle	0.924	0.8301	91.6	0.8366	0.5413	83.6	98.3
Takifugu_rubripes	0.9212	0.849	92.4	0.7942	0.457	72.9	98.1
Tympanuchus_pallidicinctus	0.9102	0.805	91.6	0.7648	0.4575	54.9	97.3
Xenopus_tropicalis	0.8731	0.7269	92.1	0.7123	0.4549	84	98.5
Zootoca_vivipara	0.884	0.7543	92.1	0.8012	0.5349	72.2	99.6

## Sheet: Table 5
Supplementary Table 5. The performance evaluation of ANNEVO and Augustus on Mammalia lineage of RefSeq.
Species name	ANNEVO_NT(CDS)_f1	ANNEVO_gene_f1	ANNEVO_BUSCO	Augustus_NT(CDS)_f1	Augustus_gene_f1	Augustus_BUSCO	RefSeq_BUSCO
Acomys_russatus	0.8957	0.7614	92.1	0.734	0.3888	66	98.8
Apodemus_sylvaticus	0.8848	0.7549	93.3	0.7112	0.3762	66.5	99.5
Balaenoptera_ricei	0.8947	0.747	92.9	0.6671	0.3486	55.8	99
Bos_indicus_x_Bos_taurus	0.8956	0.7633	93.1	0.6916	0.3553	57.8	99.5
Bos_taurus	0.8891	0.7543	93.6	0.6837	0.3522	58.2	99.4
Bubalus_kerabau	0.8906	0.7592	93.5	0.6855	0.3533	57.9	99.6
Budorcas_taxicolor	0.9056	0.7912	93.1	0.6227	0.2444	57.6	99.5
Carlito_syrichta	0.8072	0.5336	80.2	0.5972	0.2436	46.9	87.4
Cebus_imitator	0.8762	0.6949	90.3	0.6523	0.325	51.8	97.8
Cervus_canadensis	0.8919	0.7615	92.7	0.6498	0.3187	55.5	98.6
Cynocephalus_volans	0.8781	0.7291	92.7	0.6487	0.3352	52.5	99.3
Desmodus_rotundus	0.9025	0.7659	92.2	0.7229	0.3962	55.9	98.5
Dipodomys_spectabilis	0.8825	0.7576	93.6	0.6562	0.3365	60.9	98.9
Echinops_telfairi	0.8854	0.6692	82.3	0.6632	0.2924	54.7	93.4
Felis_catus	0.8967	0.7623	93.3	0.6807	0.3348	57	99.7
Halichoerus_grypus	0.89	0.7206	90	0.7004	0.3656	55.5	96.3
Homo_sapiens	0.8432	0.6582	93	0.6379	0.3051	53.5	99.8
Jaculus_jaculus	0.8824	0.7227	90.8	0.6949	0.3599	62.6	98.4
Lontra_canadensis	0.909	0.7653	93.4	0.7221	0.387	57.5	99.3
Lutra_lutra	0.8992	0.76	93.4	0.715	0.3887	57.5	99.6
Macaca_fascicularis	0.8727	0.7099	93.2	0.6416	0.3264	53.6	99.7
Marmota_marmota	0.8803	0.6988	89.1	0.6174	0.2794	53.1	96.5
Miniopterus_natalensis	0.8987	0.7089	86.8	0.7223	0.37	51.5	95.6
Molossus_molossus	0.8692	0.7169	85.1	0.6638	0.331	53.9	99.2
Monodon_monoceros	0.8896	0.7312	91.8	0.6998	0.3488	54.7	98.5
Moschus_berezovskii	0.8954	0.7694	91.7	0.6848	0.3548	56.9	98
Muntiacus_reevesi	0.8889	0.7644	93.8	0.6335	0.2978	55.2	99.6
Mustela_nigripes	0.9007	0.75	93	0.6888	0.3437	57.4	99.3
Myotis_brandtii	0.8421	0.5628	81.2	0.6814	0.3184	47.5	91.5
Myotis_myotis	0.8916	0.7492	91.8	0.7222	0.4049	57.3	99.3
Oryx_dammah	0.9006	0.7561	92.4	0.6975	0.3565	57.2	99.2
Panthera_onca	0.8818	0.6765	87.5	0.6751	0.3182	52.4	93.8
Perognathus_longimembris	0.8841	0.7532	91.3	0.6586	0.33	59.2	97.8
Peromyscus_maniculatus	0.8909	0.7273	91.7	0.7422	0.3975	65.9	98.7
Pipistrellus_kuhlii	0.8904	0.7596	90.3	0.742	0.4403	59.4	99
Pongo_pygmaeus	0.8696	0.7057	93.1	0.6443	0.3245	53.6	99.9
Pteropus_alecto	0.8921	0.6997	90	0.5791	0.2158	49.7	98
Puma_yagouaroundi	0.8984	0.7294	91.1	0.6841	0.3248	55.3	98.7
Rattus_norvegicus	0.8722	0.715	93	0.7086	0.3688	68.1	99.6
Rattus_rattus	0.8956	0.7534	90.3	0.7287	0.3816	64.1	96.5
Rousettus_aegyptiacus	0.9107	0.7854	93.2	0.5575	0.2062	51.7	99.5
Saccopteryx_leptura	0.8802	0.7297	90.1	0.6848	0.363	54.8	99.3
Saimiri_boliviensis	0.8897	0.734	92.3	0.6506	0.3253	52.1	99.5
Sapajus_apella	0.8695	0.6799	91	0.6453	0.3127	52.3	98.4
Sorex_araneus	0.9039	0.78	91.8	0.7413	0.432	66	98.4
Sus_scrofa	0.8893	0.7364	91.6	0.6823	0.3471	55.4	98.7
Symphalangus_syndactylus	0.8716	0.7002	92.3	0.6548	0.328	53.6	99.6
Tachyglossus_aculeatus	0.8841	0.73	84	0.7863	0.4743	61.7	92.3
Tursiops_truncatus	0.8867	0.7363	92.2	0.6922	0.3499	55.1	98.5
Zalophus_californianus	0.8921	0.739	93.1	0.7041	0.3756	56.5	99.6

## Sheet: Table 6
Supplementary Table 6. The computational time of ANNEVO and Augustus.
Species name	Genome size (G)	Augustus time (s)	ANNEVO prediction time (s)	ANNEVO decoding time (s)	ANNEVO time (s)
Abrus_precatorius	0.327445	3747	487.174	378.012	865.186
Acomys_russatus	2.17031	13282	3243.93	6015.9	9259.82
Actinidia_eriantha	0.619777	2844	924.844	736.529	1661.37
Amaranthus_tricolor	0.490569	4401	702.747	1114.37	1817.11
Amborella_trichopoda	0.666882	4184	1149.46	1030.75	2180.21
Ananas_comosus	0.360601	2630	578.702	550.636	1129.34
Andrographis_paniculata	0.268269	1280	394.034	317.194	711.229
Apodemus_sylvaticus	2.72502	22105	4180.68	7831.73	12012.4
Arabidopsis_thaliana	0.112844	2367	190.519	156.093	346.612
Arachis_duranensis	1.02042	19106	1455.76	1283.29	2739.05
Arachis_ipaensis	1.27637	18283	1699.07	1574.1	3273.17
Arachis_stenosperma	1.25319	19916	1701.62	2145.69	3847.31
Argentina_anserina	0.223472	3354	348.061	403.902	751.963
Balaenoptera_ricei	2.52577	33392	3730.21	7452.52	11182.7
Benincasa_hispida	0.861095	9895	1276.89	919.675	2196.57
Beta_vulgaris	0.536803	7660	751.152	780.119	1531.27
Bos_indicus_x_Bos_taurus	2.52826	16362	3744.89	7341.17	11086.1
Bos_taurus	2.613	16487	4073.24	7620.57	11693.8
Brachypodium_distachyon	0.255826	6753	375.756	304.029	679.784
Brassica_napus	0.945144	12498	1396.3	1112.29	2508.59
Brassica_oleracea	0.46546	7572	1535.99	528.721	2064.71
Brassica_rapa	0.332994	3949	500.833	413.573	914.407
Bubalus_kerabau	2.73319	28588	3997.07	8518.46	12515.5
Budorcas_taxicolor	2.68917	22191	3876.93	7495.79	11372.7
Cajanus_cajan	0.560261	6017	1646.4	723.424	2369.82
Camellia_sinensis	2.93003	11418	4270.41	4133.89	8404.3
Cannabis_sativa	0.726731	9147	1015.88	799.369	1815.25
Capsicum_annuum	3.03912	31512	6137.24	5655.4	11792.6
Carica_papaya	0.351224	2006	918.517	860.372	1778.89
Cebus_imitator	2.56362	8944	4037.19	6761.72	10798.9
Cervus_canadensis	2.38253	15070	3606.72	6899.52	10506.2
Chenopodium_quinoa	1.25788	5354	1833.83	1617.66	3451.49
Cicer_arietinum	0.501517	7514	894.608	706.834	1601.44
Citrus_sinensis	0.282681	4545	416.741	303.83	720.571
Citrus_x_clementina	0.28437	4728	465.996	318.227	784.223
Coffea_arabica	1.03245	7085	1481.31	1430.33	2911.64
Cornus_florida	1.18163	14275	1630.83	1724.25	3355.08
Corylus_avellana	0.34884	4653	530.692	377.365	908.056
Cucumis_melo	0.41356	3692	576.33	641.089	1217.42
Cucurbita_pepo	0.248949	2085	1040.34	424.939	1465.28
Cynara_cardunculus	0.684701	9899	1138.46	743.331	1881.79
Cynocephalus_volans	2.65391	30178	4039.83	7436.92	11476.7
Daucus_carota	0.415961	6008	607.158	566.789	1173.95
Dendrobium_catenatum	1.07647	5095	9704.3	2838.7	12543
Desmodus_rotundus	1.99302	22106	3099.39	5483.85	8583.24
Dioscorea_cayenensis	0.551396	3649	846.302	679.378	1525.68
Diospyros_lotus	0.594314	4951	883.051	805.724	1688.78
Dipodomys_spectabilis	2.68277	12839	4040.07	7406.01	11446.1
Durio_zibethinus	0.674528	6924	982.322	1098.9	2081.22
Echinops_telfairi	2.78001	32286	4205.34	7769.92	11975.3
Elaeis_guineensis	1.45163	15154	3011.17	2991.55	6002.72
Erigeron_canadensis	0.40211	5489	579.152	446.818	1025.97
Erythranthe_guttata	0.304064	1613	493.197	477.185	970.381
Eucalyptus_grandis	0.58137	7251	830.798	680.299	1511.1
Eutrema_salsugineum	0.229314	2551	352.308	300.053	652.361
Felis_catus	2.2874	23979	3521.72	6294.26	9815.98
Fragaria_vesca	0.202516	3970	381.148	260.555	641.703
Galeopterus_variegatus	3.02773	10762	9544.8	8792.46	18337.3
Gastrolobium_bilobum	0.55827	1479	900.467	871.969	1772.44
Glycine_max	0.923143	11155	1297.45	1076.27	2373.72
Glycine_soja	0.956084	6109	1389.08	1089.09	2478.18
Gossypium_arboreum	1.529	15369	2198.44	2348.38	4546.82
Gossypium_raimondii	0.708241	6244	1030.99	759.91	1790.9
Halichoerus_grypus	2.20595	6667	3499.23	6124.38	9623.61
Helianthus_annuus	2.83841	24174	3776.97	3631.96	7408.92
Herrania_umbratica	0.221484	1530	489.329	423.819	913.147
Hibiscus_syriacus	1.723	6230	2398.99	1870.41	4269.4
Homo_sapiens	3.11037	36317	4677.12	11839.3	16516.4
Humulus_lupulus	2.34622	31880	3130.82	2522.44	5653.26
Impatiens_glandulifera	0.616841	15774	908.837	606.289	1515.13
Jaculus_jaculus	2.70054	33961	4026.71	7293.24	11319.9
Jatropha_curcas	0.251893	2535	410.435	371.377	781.812
Juglans_regia	0.543312	4683	1470.48	660.012	2130.49
Lactuca_sativa	2.44264	43873	3294.21	2851.45	6145.67
Lolium_perenne	2.14715	39136	2899.77	3561.3	6461.08
Lolium_rigidum	2.29962	45313	3114.45	3208.72	6323.16
Lontra_canadensis	2.26948	16569	3581.14	6006.9	9588.04
Lotus_japonicus	0.522131	12300	741.866	607.631	1349.5
Lupinus_angustifolius	0.576297	3766	1175.53	672.317	1847.85
Lutra_lutra	2.29938	22945	3546.94	6117.98	9664.91
Lycium_ferocissimum	1.1518	8483	1758.32	1980.81	3739.13
Macaca_fascicularis	2.86936	24159	4352.64	10378.3	14730.9
Macadamia_integrifolia	0.702794	5139	1032.73	930.582	1963.31
Magnolia_sinica	1.73373	14838	2347.59	3018.31	5365.9
Malania_oleifera	1.40926	15850	2026.58	1784.52	3811.1
Malus_domestica	0.663363	6612	966.548	912.006	1878.55
Malus_sylvestris	0.60494	5413	834.627	683.012	1517.64
Marmota_marmota	2.36525	17777	3992.23	6326.9	10319.1
Mercurialis_annua	0.42733	7302	611.499	730.689	1342.19
Miniopterus_natalensis	1.70041	7952	2566.32	4617.61	7183.94
Miscanthus_floridulus	2.53178	25140	3436.01	3025.83	6461.84
Molossus_molossus	2.18351	27251	3207.7	6046.98	9254.68
Momordica_charantia	0.269454	1240	433.775	311.174	744.948
Monodon_monoceros	2.22229	18831	3518.15	6396.56	9914.72
Morus_notabilis	0.305389	1136	1324.14	574.502	1898.64
Moschus_berezovskii	2.65325	24624	3956.24	7738.93	11695.2
Muntiacus_reevesi	2.5047	29910	3713.84	7122.54	10836.4
Mustela_nigripes	2.3587	29086	4193.9	6542.2	10736.1
Myotis_brandtii	2.00483	9100	9120.66	7032.5	16153.2
Myotis_myotis	1.88858	23423	3739.66	4919.21	8658.87
Nicotiana_attenuata	2.23465	18737	3962.32	2993.86	6956.18
Nicotiana_sylvestris	2.12364	6218	9777.38	5334.89	15112.3
Nicotiana_tomentosiformis	1.6113	4255	6226.72	4163.37	10390.1
Nymphaea_colorata	0.385678	4105	550.24	519.656	1069.9
Olea_europaea	1.08114	6887	2436.62	1882.47	4319.09
Oryx_dammah	2.55391	21022	3989.2	7300.01	11289.2
Oryza_glaberrima	0.327642	3671	483.819	380.273	864.092
Panthera_onca	2.24937	23940	4317.54	6260.16	10577.7
Papaver_somniferum	2.5652	28511	4426.58	3082.88	7509.47
Perognathus_longimembris	2.08682	17050	3905.24	5566.63	9471.86
Peromyscus_maniculatus	2.37029	23680	3806.98	6473.35	10280.3
Phalaenopsis_equestris	1.01389	11151	3943.58	2401.46	6345.04
Phaseolus_vulgaris	0.491436	7940	699.637	553.102	1252.74
Phoenix_dactylifera	0.729447	4635	1069.63	1108.73	2178.35
Pipistrellus_kuhlii	1.67444	21173	2440.94	4368.28	6809.23
Pistacia_vera	0.633212	2339	930.699	744.46	1675.16
Pongo_pygmaeus	3.03724	23692	4805.66	9726.56	14532.2
Populus_alba	0.393355	1456	613.992	516.748	1130.74
Populus_euphratica	0.467897	1908	917.817	592.004	1509.82
Populus_nigra	0.389658	4602	575.268	715.469	1290.74
Populus_trichocarpa	0.369949	4287	559.388	398.926	958.314
Prosopis_alba	0.667509	1801	1028.03	1106.82	2134.85
Prosopis_cineraria	0.652437	5884	997.447	781.676	1779.12
Prunus_avium	0.258079	908	623.339	471.183	1094.52
Prunus_dulcis	0.214829	3926	351.577	250.605	602.183
Prunus_mume	0.221582	4601	564.328	288.076	852.403
Pteropus_alecto	1.87956	14097	4986.2	5767.37	10753.6
Puma_yagouaroundi	2.33331	19215	3839.24	6531.37	10370.6
Punica_granatum	0.302274	5242	451.424	447.844	899.268
Pyrus_x_bretschneideri	0.48014	2827	676.246	523.859	1200.11
Quercus_lobata	0.79797	9700	1186.05	839.556	2025.6
Quercus_robur	0.744339	9023	1014.33	1280.17	2294.5
Quercus_suber	0.716771	2088	1104.59	784.654	1889.24
Raphanus_sativus	0.40989	4780	731.072	441.759	1172.83
Rattus_norvegicus	2.68706	27257	4057.06	7633.29	11690.4
Rattus_rattus	2.24718	27889	3410.84	6448.48	9859.33
Rhodamnia_argentea	0.326948	3573	460.458	414.919	875.377
Rhododendron_vialii	0.50235	4764	706.698	1015.05	1721.75
Rosa_rugosa	0.393345	6934	564.84	422.522	987.362
Rousettus_aegyptiacus	1.7856	19699	2760.55	4985.48	7746.02
Saccopteryx_leptura	2.42958	42391	3569.86	6459.96	10029.8
Saimiri_boliviensis	2.50004	15716	3812.71	7003.57	10816.3
Salvia_hispanica	0.303358	5247	497.218	331.416	828.634
Salvia_miltiorrhiza	0.50132	7408	709.971	483.596	1193.57
Salvia_splendens	0.760233	4495	1099.18	699.717	1798.9
Sapajus_apella	2.57589	13157	4283.28	6974.29	11257.6
Selaginella_moellendorffii	0.200293	827	290.314	330.336	620.65
Sesamum_indicum	0.261461	2436	832.246	345.87	1178.12
Setaria_italica	0.382762	6148	542.11	446.926	989.036
Setaria_viridis	0.373292	5637	531.22	426.142	957.363
Solanum_pennellii	0.873588	13121	1241.7	1320.66	2562.36
Solanum_stenotomum	0.800248	12248	1558.58	1366.03	2924.6
Solanum_tuberosum	0.667593	2344	1381.91	890.399	2272.31
Solanum_verrucosum	0.624789	2878	897.005	862.495	1759.5
Sorex_araneus	2.26877	46736	3249.5	5833.94	9083.44
Sorghum_bicolor	0.669	8139	917.178	1476.34	2393.52
Spinacia_oleracea	0.843735	18860	1162.21	1272.51	2434.72
Sus_scrofa	2.35929	27409	3485.31	7084.98	10570.3
Symphalangus_syndactylus	3.0768	17809	5986.54	10140.7	16127.3
Tachyglossus_aculeatus	2.08683	18567	3144.65	5758.72	8903.37
Tarenaya_hassleriana	0.237017	2148	703.857	420.94	1124.8
Telopea_speciosissima	0.776311	8481	1096.19	1054.84	2151.03
Trifolium_pratense	0.390424	6858	581.418	466.448	1047.87
Tripterygium_wilfordii	0.328693	1730	501.747	596.952	1098.7
Tursiops_truncatus	2.24291	18330	3375.3	6441.76	9817.06
Vigna_angularis	0.422794	5794	610.228	407.743	1017.97
Vigna_radiata	0.437534	6478	702.69	476.476	1179.17
Vigna_unguiculata	0.489247	6123	766.15	536.02	1302.17
Vitis_riparia	0.471762	3758	703.294	619.653	1322.95
Zalophus_californianus	2.27225	22718	3418.42	6186.4	9604.82
Zea_mays	2.05837	33890	2546.7	2681.82	5228.52
Zingiber_officinale	2.91419	20508	3854.91	4060.95	7915.86

## Sheet: Table 7
Supplementary Table 7. The performance of Augustus modeling genes of different lengths. The numbers in the table represent the number of genes in the corresponding condition.
Species name	RefSeq (0-10kb)	RefSeq (10-40kb)	RefSeq (40-100kb)	RefSeq (over 100kb)	Completed prediction (0-10kb)	Completed prediction (10-40kb)	Completed prediction (40-100kb)	Completed prediction (over 100kb)
Acomys_russatus	9496	6671	2836	1808	5507	3571	1220	646
Apodemus_sylvaticus	10618	6922	2985	1919	5764	3592	1282	666
Balaenoptera_ricei	8517	5969	3064	2238	4670	2623	960	551
Bos_indicus_x_Bos_taurus	9341	6254	2982	2269	5103	2734	931	580
Bos_taurus	10134	6265	3011	2285	5319	2748	942	593
Bubalus_kerabau	10150	6389	3044	2288	5452	2815	952	561
Budorcas_taxicolor	9063	6210	2964	2197	5199	2815	954	539
Carlito_syrichta	8311	6575	3256	1875	3653	2482	885	394
Cebus_imitator	9386	6391	3350	2417	4601	2652	961	513
Cervus_canadensis	10750	6443	2930	2225	5498	2519	854	521
Cynocephalus_volans	9986	6441	3091	2176	5153	2604	884	476
Desmodus_rotundus	8890	6090	2748	1887	4755	2783	930	491
Dipodomys_spectabilis	9525	6638	2803	1666	5612	3256	1048	499
Echinops_telfairi	8869	5931	3047	2160	4657	2519	921	507
Felis_catus	8879	6120	3106	2348	4642	2716	947	590
Halichoerus_grypus	9449	6534	3229	2033	4829	2813	972	538
Homo_sapiens	9854	7348	3492	2618	4771	2951	1009	574
Jaculus_jaculus	8875	6305	3348	2385	5324	3442	1355	732
Lontra_canadensis	9024	6133	3007	2141	4870	2890	1033	580
Lutra_lutra	9504	6113	3004	2266	5044	2848	1064	610
Macaca_fascicularis	9475	6460	3328	2550	4673	2704	1028	588
Marmota_marmota	9839	6360	2902	1913	4797	2543	829	471
Miniopterus_natalensis	7801	6365	2558	1437	3704	2553	806	370
Molossus_molossus	8297	6046	2996	2028	4531	2717	912	437
Monodon_monoceros	7411	5861	2963	2142	3966	2542	897	524
Moschus_berezovskii	9406	6155	3014	2267	5261	2741	956	581
Muntiacus_reevesi	9919	6341	3007	2143	5043	2541	871	485
Mustela_nigripes	9029	6051	3008	2181	4821	2768	1022	572
Myotis_brandtii	8947	6526	2863	1652	3887	2406	823	365
Myotis_myotis	9141	6325	2855	1833	5151	2909	958	463
Oryx_dammah	9689	6254	3010	2208	5244	2726	964	532
Panthera_onca	10072	6022	2889	2088	4902	2491	845	465
Perognathus_longimembris	10054	6571	2676	1582	5763	3158	978	480
Peromyscus_maniculatus	10260	6831	3031	1944	5604	3438	1313	655
Pipistrellus_kuhlii	8608	6437	2652	1632	5010	3092	933	488
Pongo_pygmaeus	9308	6706	3488	2599	4575	2764	1074	583
Pteropus_alecto	7880	6152	2691	1640	3919	2198	676	329
Puma_yagouaroundi	8635	6045	3031	2243	4408	2599	850	547
Rattus_norvegicus	11437	6821	2930	1966	5791	3551	1210	692
Rattus_rattus	10429	6629	2814	1725	5623	3486	1181	615
Rousettus_aegyptiacus	8469	6223	2689	1689	4332	2291	705	363
Saccopteryx_leptura	7722	6256	3179	2269	4189	2885	1076	517
Saimiri_boliviensis	9010	6296	3271	2410	4596	2643	994	502
Sapajus_apella	8695	6252	3210	2407	4290	2706	927	530
Sorex_araneus	9831	6204	2747	1905	6103	3369	1092	553
Sus_scrofa	9085	6185	3157	2247	4500	2711	980	564
Symphalangus_syndactylus	9450	6545	3454	2666	4397	2678	1043	601
Tachyglossus_aculeatus	6694	6999	3180	2056	3916	3967	1573	741
Tursiops_truncatus	8191	5926	3005	2118	4301	2581	952	522
Zalophus_californianus	10042	6104	3047	2204	5176	2669	967	553

## Sheet: Table 8
Supplementary Table 8. The performance of ANNEVO modeling genes of different lengths. The numbers in the table represent the number of genes in the corresponding condition.
Species name	RefSeq (0-10kb)	RefSeq (10-40kb)	RefSeq (40-100kb)	RefSeq (over 100kb)	Completed prediction (0-10kb)	Completed prediction (10-40kb)	Completed prediction (40-100kb)	Completed prediction (over 100kb)
Acomys_russatus	9496	6671	2836	1808	7126	5686	2486	1458
Apodemus_sylvaticus	10618	6922	2985	1919	7939	5849	2559	1641
Balaenoptera_ricei	8517	5969	3064	2238	6238	5010	2605	1855
Bos_indicus_x_Bos_taurus	9341	6254	2982	2269	7137	5247	2519	1864
Bos_taurus	10134	6265	3011	2285	7311	5185	2552	1852
Bubalus_kerabau	10150	6389	3044	2288	7501	5241	2535	1821
Budorcas_taxicolor	9063	6210	2964	2197	7247	5321	2574	1799
Carlito_syrichta	8311	6575	3256	1875	5286	4783	2470	1335
Cebus_imitator	9386	6391	3350	2417	6272	5015	2731	1896
Cervus_canadensis	10750	6443	2930	2225	7897	5288	2522	1794
Cynocephalus_volans	9986	6441	3091	2176	7340	5268	2555	1759
Desmodus_rotundus	8890	6090	2748	1887	6634	5148	2379	1547
Dipodomys_spectabilis	9525	6638	2803	1666	7176	5761	2506	1409
Echinops_telfairi	8869	5931	3047	2160	6278	4558	2339	1468
Felis_catus	8879	6120	3106	2348	6472	5045	2647	1958
Halichoerus_grypus	9449	6534	3229	2033	6692	5238	2620	1580
Homo_sapiens	9854	7348	3492	2618	6816	5604	2802	1928
Jaculus_jaculus	8875	6305	3348	2385	6613	5315	2796	1863
Lontra_canadensis	9024	6133	3007	2141	6823	5187	2612	1797
Lutra_lutra	9504	6113	3004	2266	6911	5083	2602	1910
Macaca_fascicularis	9475	6460	3328	2550	6347	5184	2787	2012
Marmota_marmota	9839	6360	2902	1913	6845	5029	2391	1518
Miniopterus_natalensis	7801	6365	2558	1437	5440	5031	2055	1104
Molossus_molossus	8297	6046	2996	2028	6135	4635	2089	1197
Monodon_monoceros	7411	5861	2963	2142	5408	4845	2526	1724
Moschus_berezovskii	9406	6155	3014	2267	7188	5138	2526	1820
Muntiacus_reevesi	9919	6341	3007	2143	7740	5324	2566	1762
Mustela_nigripes	9029	6051	3008	2181	6733	5115	2600	1847
Myotis_brandtii	8947	6526	2863	1652	5486	4603	2051	1122
Myotis_myotis	9141	6325	2855	1833	6744	5187	2302	1400
Oryx_dammah	9689	6254	3010	2208	7116	5232	2546	1789
Panthera_onca	10072	6022	2889	2088	6755	4740	2362	1656
Perognathus_longimembris	10054	6571	2676	1582	7330	5518	2339	1310
Peromyscus_maniculatus	10260	6831	3031	1944	7408	5602	2535	1562
Pipistrellus_kuhlii	8608	6437	2652	1632	6454	5234	2090	1179
Pongo_pygmaeus	9308	6706	3488	2599	6229	5251	2910	2098
Pteropus_alecto	7880	6152	2691	1640	5646	4869	2172	1283
Puma_yagouaroundi	8635	6045	3031	2243	6222	4890	2519	1860
Rattus_norvegicus	11437	6821	2930	1966	7748	5522	2460	1585
Rattus_rattus	10429	6629	2814	1725	7575	5620	2407	1383
Rousettus_aegyptiacus	8469	6223	2689	1689	6266	5253	2372	1429
Saccopteryx_leptura	7722	6256	3179	2269	5715	5126	2605	1653
Saimiri_boliviensis	9010	6296	3271	2410	6290	5130	2797	1955
Sapajus_apella	8695	6252	3210	2407	5906	5046	2667	1925
Sorex_araneus	9831	6204	2747	1905	7787	5286	2340	1458
Sus_scrofa	9085	6185	3157	2247	6522	5117	2661	1812
Symphalangus_syndactylus	9450	6545	3454	2666	6015	5136	2859	2100
Tachyglossus_aculeatus	6694	6999	3180	2056	4606	5613	2638	1633
Tursiops_truncatus	8191	5926	3005	2118	5719	4837	2582	1724
Zalophus_californianus	10042	6104	3047	2204	6966	5073	2609	1812

## Sheet: Table 9
Supplementary Table 9. Sources of RNA-seq used to assist Augustus predictions.
Species name	Tissue/Phase	SRA Run Accession
Aspergillus_oryzae	1day	DRR530038
	2day	DRR530041
	3day	DRR530044
	4day	DRR530047
	5day	DRR530050
Arabidopsis_thaliana	Stem	SRR30107909
	Leaf	DRR506128
	Flower	ERR6824159
	Root apex	SRR16575076
	Fruit valve	ERR3333401
Zea_mays	Leaf	SRR30201861
	Primary root	SRR26216459
	Ear	SRR30733431
	Tassel	SRR26804886
	Embryo	SRR12487702
Homo_sapiens	Brain	SRR30113657
	Liver	ERR10618615
	Blood	SRR29771747
	Heart	SRR22751669
	Ovary	SRR29876331
Rattus_norvegicus	Brain	SRR17590585
	Liver	SRR17590583
	Blood	SRR25512213
	Heart	SRR17970526
	Ovary	SRR17737372
Sus_scrofa	Brain	SRR28798339
	Liver	SRR28798355
	Blood	SRR24856358
	Heart	SRR28798338
	Ovary	SRR27151803
Danio_rerio	Brain	SRR31179089
	Liver	SRR29290267
	Gonads	SRR24965249
	Gills	ERR4029240
	Blood	SRR24835114
Gallus_gallus	Brain	SRR27904204
	Liver	SRR31145441
	Blood	SRR23944899
	Heart	SRR20750028
	Ovary	SRR25015110
Xenopus_tropicalis	Brain	DRR540395
	Liver	DRR540537
	Skin	DRR540407
	Heart	DRR540501
	Ovary	DRR540466
Oryzias_latipes	Brain	DRR353564
	Liver	SRR23626210
	Gills	SRR1524272
	Heart	DRR400484
	Ovary	DRR400478
Drosophila_melanogaster	Brain	SRR30159208
	Fat Body	SRR28739021
	Wing Discs	SRR19520470
	Heart	SRR25556736
	Ovary	SRR31054591
Bombyx_mori	Silk Gland	DRR551199
	Brain	SRR15602293
	Ovary	SRR24759520
	Midgut	SRR31348790
	Fat Body	SRR31030484

## Sheet: Table 10
Supplementary Table 10. The performance evaluation of ANNEVO, Helixer and evidence-assisted methods in 12 model species.
Species name	Augustus_NT(CDS)_recall	Augustus_NT(CDS)_precision	Augustus_NT(CDS)_f1	Augustus_gene_recall	Augustus_gene_precision	Augustus_gene_f1	Augustus_BUSCO	Augustus-Evidence_NT(CDS)_recall	Augustus-Evidence_NT(CDS)_precision	Augustus-Evidence_NT(CDS)_f1	Augustus-Evidence_gene_recall	Augustus-Evidence_gene_precision	Augustus-Evidence_gene_f1	Augustus-Evidence_BUSCO	GeneMark-ETP_NT(CDS)_recall	GeneMark-ETP_NT(CDS)_precision	GeneMark-ETP_NT(CDS)_f1	GeneMark-ETP_gene_recall	GeneMark-ETP_gene_precision	GeneMark-ETP_gene_f1	GeneMark-ETP_BUSCO	BRAKER3_NT(CDS)_recall	BRAKER3_NT(CDS)_precision	BRAKER3_NT(CDS)_f1	BRAKER3_gene_recall	BRAKER3_gene_precision	BRAKER3_gene_f1	BRAKER3_BUSCO	Helixer_NT(CDS)_recall	Helixer_NT(CDS)_precision	Helixer_NT(CDS)_f1	Helixer_gene_recall	Helixer_gene_precision	Helixer_gene_f1	Helixer_BUSCO	ANNEVO_NT(CDS)_recall	ANNEVO_NT(CDS)_precision	ANNEVO_NT(CDS)_f1	ANNEVO_gene_recall	ANNEVO_gene_precision	ANNEVO_gene_f1	ANNEVO_BUSCO
Aspergillus_oryzae	0.7112	0.9272	0.805	0.4814	0.62	0.542	81.4	0.7581	0.8996	0.8228	0.4998	0.5363	0.5174	84.5	0.9612	0.8964	0.9277	0.7536	0.7194	0.7361	99.7	0.9038	0.8982	0.901	0.7254	0.7214	0.7234	99.6	0.9762	0.8746	0.9226	0.7694	0.6642	0.713	99.7	0.9686	0.8878	0.9264	0.7448	0.7049	0.7243	99.4
Arabidopsis_thaliana	0.9463	0.7914	0.8619	0.7655	0.7085	0.7359	97.9	0.9563	0.7974	0.8697	0.8089	0.7284	0.7666	98.2	0.9551	0.7966	0.8687	0.8648	0.7826	0.8217	99.3	0.9201	0.8977	0.9088	0.848	0.8406	0.8443	99.1	0.957	0.9357	0.9463	0.866	0.8831	0.8745	98.8	0.9407	0.9388	0.9397	0.82	0.9278	0.8706	97.3
Zea_mays	0.8027	0.3775	0.5135	0.5983	0.1886	0.2868	55.9	0.9129	0.4442	0.5976	0.7341	0.2581	0.382	92.3	0.9118	0.1607	0.2733	0.7574	0.1289	0.2203	96.8	0.8342	0.8043	0.819	0.7461	0.664	0.7027	97.4	0.8847	0.5957	0.712	0.7591	0.5092	0.6095	94.3	0.8862	0.7769	0.828	0.7526	0.6908	0.7204	94.5
Rattus_norvegicus	0.765	0.6599	0.7086	0.4856	0.2973	0.3688	68.1	0.9132	0.7296	0.8112	0.7394	0.4456	0.5561	94.3	0.8957	0.5344	0.6694	0.7359	0.2788	0.4044	94.3	0.8065	0.9126	0.8562	0.7367	0.7883	0.7617	93.2	0.844	0.8987	0.8705	0.6738	0.7672	0.7175	90.2	0.8999	0.8462	0.8722	0.7478	0.6849	0.715	93
Homo_sapiens	0.6746	0.6049	0.6379	0.3992	0.247	0.3051	53.5	0.9049	0.7075	0.7941	0.6748	0.4158	0.5145	90.8	0.8991	0.2111	0.342	0.6153	0.0931	0.1617	88.7	0.7422	0.881	0.8057	0.6639	0.7187	0.6902	87.3	0.9105	0.8399	0.8738	0.7483	0.6864	0.716	92.6	0.9182	0.7796	0.8432	0.7357	0.5956	0.6582	93
Sus_scrofa	0.6898	0.675	0.6823	0.4235	0.294	0.3471	55.4	0.9033	0.7812	0.8378	0.711	0.4911	0.5809	88.4	0.8717	0.213	0.3424	0.5886	0.0971	0.1667	81.4	0.6195	0.9023	0.7347	0.6337	0.7213	0.6747	75.9	0.8501	0.8324	0.8412	0.5696	0.4195	0.4832	68.4	0.9173	0.863	0.8893	0.7793	0.698	0.7364	91.6
Danio_rerio	0.895	0.6323	0.7411	0.6034	0.3225	0.4203	85.9	0.9513	0.68	0.7931	0.7713	0.4562	0.5733	95.3	0.9366	0.6472	0.7655	0.7923	0.4422	0.5676	95.6	0.7778	0.929	0.8467	0.7504	0.8547	0.7991	93.1	0.9104	0.8516	0.88	0.7381	0.5677	0.6418	86.3	0.8903	0.8862	0.8883	0.7543	0.7376	0.7459	93.3
Gallus_gallus	0.6844	0.8485	0.7577	0.4247	0.4769	0.4493	57.2	0.9054	0.8656	0.885	0.7248	0.6736	0.6983	94.5	0.9105	0.4062	0.5618	0.7117	0.2116	0.3262	92.9	0.7975	0.8887	0.8406	0.7449	0.7675	0.756	93.5	0.9096	0.8638	0.8861	0.7817	0.7494	0.7652	93.9	0.8721	0.8951	0.8834	0.7234	0.7925	0.7564	92.4
Xenopus_tropicalis	0.8781	0.5992	0.7123	0.6091	0.3631	0.4549	84	0.9421	0.6813	0.7907	0.7887	0.517	0.6246	96	0.9376	0.5891	0.7235	0.8128	0.4173	0.5515	97.4	0.8013	0.8744	0.8363	0.773	0.7932	0.783	96.5	0.8825	0.8098	0.8446	0.6886	0.6105	0.6472	88.1	0.8867	0.8599	0.8731	0.7543	0.7014	0.7269	92.1
Oryzias_latipes	0.901	0.5898	0.7129	0.609	0.2871	0.3902	82.4	0.9562	0.6682	0.7867	0.8031	0.4529	0.5792	95.9	0.9438	0.669	0.783	0.8649	0.4956	0.6301	97.1	0.8447	0.944	0.8916	0.8421	0.8827	0.8619	95.9	0.92	0.8947	0.9072	0.8083	0.6931	0.7462	89.6	0.9201	0.9169	0.9185	0.8337	0.8091	0.8212	93.4
Drosophila_melanogaster	0.9184	0.8183	0.8655	0.731	0.6599	0.6936	96.7	0.936	0.841	0.8859	0.7831	0.7212	0.7509	97.1	0.9241	0.8595	0.8906	0.799	0.7979	0.7985	97.7	0.9041	0.8989	0.9015	0.8371	0.857	0.8469	98.2	0.9644	0.91	0.9364	0.844	0.8423	0.8432	97.8	0.9628	0.897	0.9287	0.8029	0.8412	0.8216	97.1
Bombyx_mori	0.7928	0.5947	0.6796	0.5205	0.3701	0.4326	63.7	0.8801	0.6413	0.742	0.709	0.5164	0.5976	87.4	0.9418	0.5445	0.6901	0.8005	0.4629	0.5866	98.7	0.7661	0.8484	0.8052	0.7287	0.8088	0.7667	97.6	0.8313	0.8684	0.8494	0.6613	0.6313	0.646	83.7	0.8563	0.845	0.8506	0.7006	0.728	0.7141	89.8

[truncated: 17 more sheets: Table 11, Table 12, Table 13, Table 14, Table 15, Table 16, Table 17, Table 18, Table 19, Table 20, Table 21, Table 22, Table 23, Table 24, Table 25, Table 26, Table 27]
